# Supplementary material for: Transcriptome Analysis of Flowering Time Genes under Drought Stress in Maize Leaves
Source: Front Plant Sci. 2017 Mar 1;8:267. doi: 10.3389/fpls.2017.00267 (PMC5331056; doi:10.3389/fpls.2017.00267)
Supplement: Table S3 — GO Slim terms from results of BiNGO. [file Table3.XLSX]

## Sheet: Sheet1
Table S3. GO Slim terms from results of BiNGO
GO ID	p-value	corr p-value	No. of genes	No. gene of cluster	Description	Genes in test set
5737	5.6051e-103	0	241	3832	cytoplasm	GRMZM2G026980|GRMZM2G046849_T01|GRMZM2G142718|GRMZM2G130053|GRMZM2G081114|GRMZM2G400602_T01|GRMZM2G175401|GRMZM2G067042|GRMZM2G033846_T01|XLOC_040321|GRMZM2G365160|GRMZM2G138468|GRMZM2G137498|GRMZM2G050286|GRMZM5G858784|GRMZM2G039828|GRMZM2G170734|GRMZM2G033846|GRMZM2G000587|AC213521.3_FG005|GRMZM2G320373|GRMZM2G125923|GRMZM2G450498_T01|GRMZM2G085967|GRMZM2G155464|GRMZM2G025322_T01|GRMZM2G450125_…
5623	3.1301e-94	1.3616e-92	422	14313	cell	GRMZM2G026980|GRMZM2G046849_T01|GRMZM5G827496|GRMZM2G142718|GRMZM2G081114|GRMZM2G175401|GRMZM2G404977|GRMZM2G067042|GRMZM2G333454|GRMZM2G033846_T01|XLOC_040321|GRMZM2G365160|GRMZM2G138468|GRMZM2G137498|AC234520.1_FG003|GRMZM2G362303_T01|GRMZM2G039828|GRMZM2G000587|GRMZM2G080274|GRMZM2G320373|GRMZM2G085967|GRMZM2G087901|GRMZM5G830545|GRMZM2G025322_T01|GRMZM2G092363|GRMZM2G450125_T01|GRMZM2G127421|…
5575	5.2192e-92	1.5136e-90	426	14823	cellular_component	GRMZM2G026980|GRMZM2G046849_T01|GRMZM5G827496|GRMZM2G142718|GRMZM2G081114|GRMZM2G175401|GRMZM2G404977|GRMZM2G067042|GRMZM2G333454|GRMZM2G033846_T01|XLOC_040321|GRMZM2G365160|GRMZM2G138468|GRMZM2G137498|AC234520.1_FG003|GRMZM2G362303_T01|GRMZM2G039828|GRMZM2G000587|GRMZM2G080274|GRMZM2G320373|GRMZM2G085967|GRMZM2G087901|GRMZM5G830545|GRMZM2G025322_T01|GRMZM2G092363|GRMZM2G450125_T01|GRMZM2G127421|…
9536	1.8993e-89	4.1309e-88	68	140	plastid	GRMZM2G046849_T01|GRMZM2G144083_T01|GRMZM2G171912|DHN1|XLOC_040910|GRMZM2G142718|GRMZM2G155370_T01|GRMZM2G081114|GRMZM2G450125|GRMZM2G049349|GRMZM2G171912_T01|GRMZM2G181607_T01|GRMZM2G181607|GRMZM2G401026|GRMZM2G414192|GRMZM2G058404_T01|TPS1|GRMZM2G365160|GRMZM2G137498|GRMZM5G858784|GRMZM2G039828|AC213521.3_FG005|AC233865.1_FGT001|GRMZM2G125923|GRMZM2G064406|GRMZM2G065214|GRMZM2G163809|GRMZM2G493…
5622	5.0554e-80	8.7964e-79	335	9719	intracellular	GRMZM2G026980|GRMZM2G046849_T01|GRMZM2G176173|GRMZM2G142718|GRMZM2G130053|GRMZM2G081114|GRMZM2G400602_T01|GRMZM2G175401|GRMZM2G358076|GRMZM2G067042|GRMZM2G033846_T01|XLOC_040321|GRMZM2G365160|GRMZM2G138468|GRMZM2G137498|GRMZM2G050286|AC234520.1_FG003|GRMZM5G858784|GRMZM2G039828|GRMZM2G170734|GRMZM2G033846|GRMZM2G000587|GRMZM2G080274|AC213521.3_FG005|GRMZM2G137046_T01|GRMZM2G320373|GRMZM2G125923|G…
19748	2.7896e-50	4.0449e-49	38	78	secondary metabolic process	GRMZM2G095280|GRMZM2G146913|GRMZM2G179147|GRMZM2G137046|GRMZM2G146913_T01|GRMZM2G140355_T01|GRMZM2G475059|GRMZM2G479038_T01|GRMZM2G102079|GRMZM2G120320|GRMZM2G126505|GRMZM2G313184|GRMZM2G067042|GRMZM2G033098|GRMZM2G058404_T01|GRMZM2G179147_T02|GRMZM5G891656|GRMZM5G858784|CYP71C4|GRMZM2G479038|GRMZM2G118610|GRMZM2G126505_T01|GRMZM2G137046_T01|GRMZM2G179092_T01|GRMZM2G007012|GRMZM2G493395|GRMZM2G45…
16020	8.595e-35	1.0682e-33	185	5489	membrane	GRMZM2G110286|GRMZM2G014022_T01|GRMZM2G074540|GRMZM2G097141|GRMZM2G144083_T01|GRMZM2G178074|GRMZM5G827496|GRMZM2G178356|GRMZM2G049349|GRMZM2G400602_T01|GRMZM2G175401|GRMZM2G470882|GRMZM2G130348_T01|GRMZM2G177668|GRMZM5G833406|GRMZM5G805732|GRMZM2G126505|GRMZM2G150864|GRMZM2G404977|GRMZM2G067042|GRMZM2G333454|XLOC_040321|GRMZM6G183316|GRMZM2G050286|GRMZM2G076972|GRMZM2G470882_T01|GRMZM2G362303_T01…
5886	4.0017e-32	4.3518e-31	37	187	plasma membrane	GRMZM2G144083_T01|GRMZM2G118821|GRMZM2G178074|GRMZM2G179349|GRMZM2G157675|GRMZM5G805732|GRMZM2G150864|GRMZM2G145440|GRMZM2G160430|GRMZM2G136300|GRMZM2G135013|GRMZM2G136300_T01|AC233865.1_FGT001|GRMZM2G108537|GRMZM2G362303|GRMZM2G045473|GRMZM2G042364_T02|GRMZM2G042364|GRMZM2G087901|PIP1-6|GRMZM2G047616|XLOC_023695|GRMZM2G023847|GRMZM2G144083|GRMZM2G099619|GRMZM2G088053|GRMZM2G039365|GRMZM2G087901_…
7275	8.2028e-29	7.9294e-28	31	139	multicellular organismal development	GRMZM2G026980|GRMZM2G026980_T01|GRMZM2G154580|GRMZM2G176173|GRMZM2G179147|GRMZM2G137046|GRMZM2G393272_T01|GRMZM2G140355_T01|GRMZM5G853245_T03|GRMZM2G100412|XLOC_019670|GRMZM2G126505|GRMZM2G467695|GRMZM2G021777|GRMZM2G067042|GRMZM2G179147_T02|GRMZM5G801627_T02|GRMZM2G004483_T01|GRMZM2G134941|GRMZM2G126505_T01|GRMZM2G137046_T01|XLOC_035052|GRMZM2G154580_T01|GRMZM2G393272|GRMZM2G004483|GRMZM2G060163…
6350	3.354e-25	2.7488e-24	49	561	transcription	GRMZM2G005939_T01|GRMZM2G003466|GRMZM2G079632|GRMZM2G171912|DHN1|GRMZM2G123119|GRMZM2G142718|GRMZM2G027478|GRMZM2G137046|GRMZM2G171912_T01|GRMZM2G151826_T01|GRMZM2G120320|GRMZM2G079632_T01|GRMZM2G358796|GRMZM2G027478_T02|GRMZM2G167018|AC234520.1_FG003|GRMZM2G437859|GRMZM2G039828|GRMZM2G002128|GRMZM2G170734|GRMZM2G137046_T01|AC233865.1_FGT001|GRMZM2G159500|GRMZM2G039586|GRMZM2G103250_T01|GRMZM2G07…
9719	3.4755e-25	2.7488e-24	25	97	response to endogenous stimulus	GRMZM2G460861|GRMZM2G178074|GRMZM2G137046|GRMZM2G140355_T01|GRMZM5G853245_T03|XLOC_019670|GRMZM2G033098|GRMZM2G038003|GRMZM2G145440|GRMZM2G116614|GRMZM5G801627_T02|GRMZM2G005954|GRMZM2G134941|GRMZM5G838098|GRMZM2G170734|GRMZM2G137046_T01|GRMZM2G362303|GRMZM5G822593|GRMZM2G392101|GRMZM2G466298|GRMZM2G475683|GRMZM5G801627|GRMZM5G853245|GRMZM2G094028|GRMZM2G059138
9791	3.835e-25	2.7804e-24	13	13	post-embryonic development	GRMZM2G004483_T01|GRMZM2G154580|GRMZM2G176173|GRMZM2G137046_T01|GRMZM2G154580_T01|GRMZM2G393272|GRMZM2G004483|GRMZM2G137046|GRMZM2G393272_T01|GRMZM2G140355_T01|GRMZM2G092363|GRMZM2G021777|GRMZM2G021777_T01
9987	3.8766e-23	2.5943e-22	318	15382	cellular process	GRMZM2G026980|GRMZM2G142718|GRMZM2G130053|GRMZM2G081114|GRMZM2G178356|GRMZM2G175401|GRMZM2G358076|GRMZM2G067042|GRMZM2G051943|XLOC_040321|GRMZM2G365160|GRMZM2G138468|GRMZM2G137498|AC234520.1_FG003|GRMZM2G362303_T01|GRMZM5G858784|GRMZM2G039828|GRMZM2G170734|GRMZM2G080274|XLOC_024616|AC213521.3_FG005|GRMZM2G137046_T01|GRMZM2G125923|GRMZM2G450498_T01|GRMZM2G085967|GRMZM2G087901|GRMZM5G830545|GRMZM2G…
5739	3.5891e-22	2.2304e-21	39	395	mitochondrion	GRMZM2G055545|GRMZM2G460861|GRMZM2G133483|GRMZM2G074540|GRMZM2G031637|GRMZM2G146913|GRMZM2G048033|GRMZM2G171912|DHN1|GRMZM2G099003|GRMZM2G106945_T01|GRMZM2G157675|GRMZM2G146913_T01|GRMZM2G171912_T01|GRMZM2G400602_T01|XLOC_036190|GRMZM2G068179|GRMZM2G042539|GRMZM2G358796|GRMZM2G127350|GRMZM2G033098|GRMZM2G007729|XLOC_029302|GRMZM2G039828|GRMZM2G079683|GRMZM2G099454|GRMZM2G444560|GRMZM2G106945|GRMZ…
9908	2.2342e-21	1.2958e-20	11	11	flower development	GRMZM2G004483_T01|GRMZM2G154580|GRMZM2G092363|GRMZM2G176173|GRMZM2G021777|GRMZM2G137046_T01|GRMZM2G154580_T01|GRMZM2G004483|GRMZM2G137046|GRMZM2G021777_T01|GRMZM2G140355_T01
7154	6.669e-20	3.6263e-19	22	108	cell communication	GRMZM2G116614|GRMZM5G801627_T02|GRMZM2G460861|GRMZM2G135013|GRMZM2G005954|GRMZM5G838098|GRMZM2G177050|GRMZM2G178074|GRMZM2G170734|GRMZM2G137046_T01|GRMZM2G137046|GRMZM2G140355_T01|GRMZM2G175995|GRMZM5G853245_T03|XLOC_019670|GRMZM2G392101|GRMZM2G475683|GRMZM2G033098|GRMZM5G801627|GRMZM5G853245|GRMZM2G333448|GRMZM2G059138
6139	3.0238e-17	1.5475e-16	97	2878	nucleobase, nucleoside, nucleotide and nucleic acid metabolic process	GRMZM2G003466|GRMZM2G144083_T01|DHN1|GRMZM2G123119|GRMZM2G142718|GRMZM2G081114|GRMZM2G358076|XLOC_040321|GRMZM2G137498|AC234520.1_FG003|GRMZM2G039828|GRMZM2G002128|GRMZM2G170734|XLOC_024616|GRMZM2G137046_T01|AC233865.1_FGT001|GRMZM2G151826|GRMZM2G120320_T01|XLOC_033242|GRMZM2G301485|GRMZM2G347043|GRMZM2G146614|GRMZM2G400714|GRMZM2G005066|GRMZM2G016997|XLOC_029302|GRMZM2G356714|XLOC_014975|XLOC_01…
9056	4.4171e-17	2.1349e-16	54	1051	catabolic process	GRMZM2G146913|GRMZM2G431006|GRMZM2G130053|GRMZM2G081114|GRMZM2G450125|GRMZM2G120408|GRMZM2G475059|GRMZM2G126505|GRMZM2G427815|GRMZM2G018820_T03|GRMZM2G051943|GRMZM2G055585|GRMZM2G128682|GRMZM2G138468|GRMZM2G005633|GRMZM2G078472|GRMZM2G162359|GRMZM2G134941|GRMZM2G170734|GRMZM2G126505_T01|GRMZM2G450498_T01|GRMZM2G118355|GRMZM2G085967|GRMZM2G450498|GRMZM2G018820|GRMZM2G170692|GRMZM2G018108|GRMZM2G13…
16043	2.7122e-13	1.2419e-12	54	1300	cellular component organization	GRMZM2G026980|GRMZM2G026980_T01|GRMZM2G107073|GRMZM2G094990|GRMZM2G431006|GRMZM2G155370_T01|GRMZM2G027478|GRMZM2G081114|GRMZM2G137046|GRMZM2G151826_T01|GRMZM2G150864|GRMZM2G067042|GRMZM2G027478_T02|GRMZM2G164020|GRMZM2G128682|GRMZM2G137498|GRMZM2G134941|GRMZM2G170734|GRMZM2G080274|GRMZM2G137046_T01|AC233865.1_FGT001|GRMZM2G450498_T01|GRMZM2G085967|GRMZM2G450498|GRMZM2G080274_T02|H4C14|GRMZM2G1518…
5634	3.5425e-13	1.541e-12	96	3295	nucleus	GRMZM5G892308|GRMZM2G005939_T01|GRMZM2G003466|GRMZM2G154580|GRMZM2G079632|GRMZM2G176173|GRMZM2G123119|GRMZM2G142718|GRMZM2G027478|AC193786.3_FG005|GRMZM2G060057|GRMZM2G171912_T01|GRMZM2G177229|GRMZM2G151826_T01|GRMZM5G853245_T03|GRMZM5G827207|GRMZM2G358076|XLOC_019670|GRMZM2G120320|GRMZM2G079632_T01|GRMZM2G021777|GRMZM2G164341|GRMZM2G027478_T02|GRMZM2G164020|GRMZM2G167018|GRMZM2G350312|XLOC_04032…
8152	6.1295e-13	2.5394e-12	315	17438	metabolic process	GRMZM2G026980|GRMZM2G063924|GRMZM2G142718|GRMZM2G130053|GRMZM2G081114|GRMZM2G175401|GRMZM2G358076|GRMZM2G067042|GRMZM2G051943|XLOC_040321|GRMZM2G365160|GRMZM2G013781|GRMZM2G138468|GRMZM2G137498|AC234520.1_FG003|GRMZM2G362303_T01|GRMZM5G858784|GRMZM2G371167|GRMZM2G039828|GRMZM2G170734|GRMZM2G000587|XLOC_024616|AC213521.3_FG005|GRMZM2G137046_T01|GRMZM2G125923|GRMZM2G450498_T01|GRMZM2G085967|GRMZM2G…
9058	1.4697e-12	5.8118e-12	124	4909	biosynthetic process	GRMZM2G003466|GRMZM2G144083_T01|GRMZM2G063924|DHN1|GRMZM2G123119|GRMZM2G142718|GRMZM2G081114|GRMZM2G126505|GRMZM2G150864|GRMZM2G067042|GRMZM2G365160|GRMZM5G891656|GRMZM2G137498|AC234520.1_FG003|GRMZM5G858784|GRMZM2G078472|GRMZM2G039828|GRMZM2G002128|GRMZM2G170734|GRMZM2G003526_T01|GRMZM2G000587|GRMZM2G126505_T01|AC213521.3_FG005|GRMZM2G137046_T01|AC233865.1_FGT001|GRMZM2G125923|GRMZM2G007012|GRMZ…
7049	1.8537e-11	7.0119e-11	12	59	cell cycle	GRMZM2G060163|GRMZM2G016997|GRMZM2G467695|GRMZM2G134941|GRMZM2G103250_T01|GRMZM2G131575_T01|GRMZM2G090865_T03|GRMZM2G059037|GRMZM2G131575_T02|GRMZM2G131575|GRMZM2G431006|GRMZM2G103250
19725	1.1965e-09	4.3372e-09	20	274	cellular homeostasis	GRMZM5G892308|GRMZM2G110286|GRMZM2G413315|GRMZM2G074540|GRMZM2G337706|GRMZM2G059836|GRMZM2G169726|GRMZM2G119967|GRMZM2G055704|GRMZM2G055704_T01|GRMZM2G178356|GRMZM2G018820|GRMZM2G181607_T01|GRMZM5G822593|GRMZM2G181607|GRMZM2G059836_T01|GRMZM2G018820_T03|AC234521.1_FG004|GRMZM2G032763|GRMZM2G052796
3	1.9723e-09	6.8637e-09	17	199	reproduction	GRMZM2G004483_T01|GRMZM2G135013|GRMZM2G154580|GRMZM2G176173|GRMZM2G094990|GRMZM2G137046_T01|GRMZM2G154580_T01|GRMZM2G004483|GRMZM2G087901|GRMZM2G137046|GRMZM2G140355_T01|GRMZM2G087901_T02|GRMZM2G467695|GRMZM2G092363|GRMZM2G021777|GRMZM2G059037|GRMZM2G021777_T01
9607	2.4424e-09	8.1727e-09	9	40	response to biotic stimulus	GRMZM5G822593|GRMZM2G117942|GRMZM2G170734|GRMZM2G099454|GRMZM2G033098|GRMZM2G393272|GRMZM2G312069|GRMZM2G178875|GRMZM2G393272_T01
9605	3.2827e-09	1.0578e-08	8	29	response to external stimulus	GRMZM5G822593|GRMZM2G117942|GRMZM2G170734|GRMZM2G099454|GRMZM2G033098|GRMZM2G393272|GRMZM2G312069|GRMZM2G393272_T01
5576	7.2515e-08	2.2531e-07	27	606	extracellular region	GRMZM2G060837|GRMZM2G026980|GRMZM2G026980_T01|GRMZM2G107073|GRMZM2G482256|GRMZM2G136534|GRMZM2G011523|GRMZM2G094990|GRMZM2G130053|GRMZM2G060837_T05|GRMZM2G011523_T06|GRMZM2G427815|GRMZM2G313184|GRMZM2G073079|GRMZM2G055585|GRMZM2G128682|GRMZM2G136534_T01|GRMZM2G162359|GRMZM2G085967|GRMZM2G094328|GRMZM2G090245|GRMZM2G130053_T01|GRMZM2G090245_T01|GRMZM2G465226|GRMZM2G167220|GRMZM2G117706|GRMZM2G1309…
5829	1.472e-07	4.4161e-07	14	178	cytosol	GRMZM2G142802|GRMZM2G078472|GRMZM2G033846|AC233865.1_FGT001|GRMZM2G450498_T01|GRMZM2G118770|GRMZM2G450498|GRMZM2G060163|GRMZM2G068179|H4C14|GRMZM2G360681|GRMZM2G150864|GRMZM2G053669|GRMZM2G033846_T01
9653	1.5715e-07	4.5573e-07	4	5	anatomical structure morphogenesis	GRMZM2G467695|GRMZM2G393272|GRMZM2G147279|GRMZM2G393272_T01
5773	1.6344e-07	4.5868e-07	8	46	vacuole	H4C14|GRMZM2G130053_T01|GRMZM2G170734|GRMZM2G067042|AC233865.1_FGT001|AC234521.1_FG004|GRMZM2G130053|GRMZM2G329229
5975	3.0562e-07	8.155e-07	53	1875	carbohydrate metabolic process	GRMZM2G095280|GRMZM2G026980|GRMZM2G026980_T01|GRMZM2G107073|GRMZM2G089836|GRMZM2G160506|GRMZM2G431006|GRMZM2G027478|GRMZM2G081114|GRMZM2G450125|GRMZM2G127117|GRMZM2G018820_T03|GRMZM2G067042|GRMZM2G051943|GRMZM2G027478_T02|GRMZM2G055585|GRMZM2G128682|GRMZM2G138468|GRMZM2G005633|GRMZM2G162359|GRMZM2G137535|GRMZM2G000587|GRMZM2G118355|GRMZM2G087901|GRMZM2G007012|GRMZM2G457929|GRMZM2G137535_T01|GRMZM…
30154	3.0933e-07	8.155e-07	5	12	cell differentiation	GRMZM2G039586|GRMZM2G137046_T01|GRMZM2G147279|GRMZM2G137046|GRMZM2G140355_T01
6259	1.7745e-06	4.5405e-06	30	847	DNA metabolic process	XLOC_033242|XLOC_014900|XLOC_040910|XLOC_044042|GRMZM2G046615|GRMZM2G138382_T01|GRMZM2G467695|XLOC_024615|XLOC_009734|XLOC_006322|XLOC_006320|ZMA-MIR528A|XLOC_029302|XLOC_028993|XLOC_024694|GRMZM2G356714|XLOC_014975|XLOC_014979|XLOC_024616|GRMZM2G064406|GRMZM2G060163|GRMZM2G103250_T01|GRMZM2G059037|XLOC_029552|XLOC_029574|XLOC_003487|XLOC_029551|XLOC_029572|XLOC_023395|GRMZM2G103250
7165	6.4079e-06	1.5928e-05	23	591	signal transduction	GRMZM2G116614|GRMZM5G801627_T02|GRMZM2G460861|GRMZM2G005954|GRMZM5G838098|GRMZM2G177050|GRMZM2G178074|GRMZM2G170734|GRMZM2G137046_T01|GRMZM2G431006|GRMZM2G137046|GRMZM2G120408|GRMZM2G140355_T01|GRMZM2G175995|GRMZM5G853245_T03|XLOC_019670|GRMZM2G392101|GRMZM2G475683|GRMZM2G033098|GRMZM5G801627|GRMZM5G853245|GRMZM2G333448|GRMZM2G059138
5618	7.1335e-06	1.7239e-05	12	182	cell wall	GRMZM2G094328|GRMZM2G060837|GRMZM2G090245|GRMZM2G026980|GRMZM2G026980_T01|GRMZM2G090245_T01|GRMZM2G094990|GRMZM2G313184|GRMZM2G060837_T05|GRMZM2G085967|GRMZM2G429842|GRMZM2G128682
30312	1.505e-05	3.5388e-05	13	229	external encapsulating structure	GRMZM2G060837|GRMZM2G026980|GRMZM2G026980_T01|GRMZM2G094990|GRMZM2G060837_T05|GRMZM2G085967|GRMZM2G094328|GRMZM2G090245|GRMZM2G003002_T01|GRMZM2G090245_T01|GRMZM2G313184|GRMZM2G429842|GRMZM2G128682
6950	2.4883e-05	5.6969e-05	69	3107	response to stress	GRMZM2G046849_T01|GRMZM2G144083_T01|GRMZM2G099003|GRMZM2G178875|GRMZM2G120408|GRMZM2G171912_T01|GRMZM2G181607_T01|GRMZM2G181607|GRMZM2G130348_T01|GRMZM2G120320|GRMZM2G427815|GRMZM2G051943|GRMZM2G033846_T01|TPS1|GRMZM2G142802|GRMZM2G116614|GRMZM2G005954|GRMZM2G162359|GRMZM2G117942|GRMZM2G046382|GRMZM2G170734|AC233865.1_FGT001|GRMZM2G064406|GRMZM2G085967|GRMZM2G179092_T01|GRMZM2G080274_T02|GRMZM2G0…
30246	3.3086e-05	7.3808e-05	14	283	carbohydrate binding	GRMZM2G005633|GRMZM2G005633_T02|GRMZM2G362303_T01|GRMZM2G162359|GRMZM2G117942|GRMZM2G134205|GRMZM2G154124|GRMZM2G362303|GRMZM2G400602_T01|GRMZM2G125233|GRMZM2G466298|GRMZM2G051943|GRMZM2G050536|GRMZM2G094028
6629	3.9598e-05	8.6126e-05	32	1096	lipid metabolic process	GRMZM2G044472|GRMZM2G179147|GRMZM2G081114|GRMZM2G100412|GRMZM2G120320|GRMZM2G126505|GRMZM2G018820_T03|GRMZM2G067042|GRMZM2G003526|GRMZM2G033098|GRMZM2G058404_T01|GRMZM2G179147_T02|GRMZM2G102760_T01|GRMZM5G858784|GRMZM2G061419_T01|GRMZM2G164318_T01|GRMZM2G164318|GRMZM2G003526_T01|GRMZM2G126505_T01|GRMZM2G179092_T01|GRMZM2G163809|GRMZM2G493395|GRMZM2G018820|GRMZM5G822593|GRMZM2G394968|GRMZM2G163809…
6519	5.3346e-05	0.0001132	30	1013	cellular amino acid and derivative metabolic process	GRMZM2G095280|GRMZM2G006480_T02|GRMZM2G146913|GRMZM2G137046|GRMZM2G146913_T01|GRMZM2G140355_T01|GRMZM2G475059|GRMZM2G138382_T01|GRMZM2G365160_T01|GRMZM2G479038_T01|GRMZM2G313184|GRMZM2G033098|GRMZM2G053669|GRMZM2G365160|GRMZM2G142802|GRMZM5G894619|GRMZM2G078472|GRMZM2G479038|GRMZM2G118610|GRMZM2G137046_T01|GRMZM2G125923|GRMZM2G450498_T01|GRMZM2G007012|GRMZM2G450498|GRMZM2G457929|GRMZM5G822593|GRM…
5615	8.0233e-05	0.00016385	3	7	extracellular space	GRMZM2G130053_T01|GRMZM2G130053|GRMZM2G167220
9579	8.0985e-05	0.00016385	9	133	thylakoid	GRMZM5G822593|GRMZM2G104549|H4C14|GRMZM2G414192|GRMZM2G054591|GRMZM2G033098|AC233865.1_FGT001|GRMZM2G147279|AC208915.3_FG010
8150	0.0001738	0.00034365	413	28098	biological_process	GRMZM2G026980|GRMZM2G046849_T01|GRMZM2G063924|GRMZM5G827496|GRMZM2G142718|GRMZM2G081114|GRMZM2G175401|GRMZM2G067042|GRMZM2G051943|GRMZM2G033846_T01|XLOC_040321|GRMZM2G365160|GRMZM2G013781|GRMZM2G138468|GRMZM2G137498|AC234520.1_FG003|GRMZM2G362303_T01|GRMZM2G039828|GRMZM2G000587|GRMZM2G080274|GRMZM2G085967|GRMZM2G087901|GRMZM5G830545|GRMZM2G025322_T01|GRMZM2G092363|GRMZM2G450125_T01|GRMZM2G127421|…
5215	0.00046821	0.00090521	53	2459	transporter activity	GRMZM2G055545|GRMZM2G074540|GRMZM2G144083_T01|GRMZM2G001764|GRMZM5G827496|GRMZM2G178356|GRMZM2G400602_T01|GRMZM5G805732|XLOC_040321|GRMZM2G151903_T02|GRMZM2G136300_T01|GRMZM2G437859|GRMZM2G087901|GRMZM6G654251|GRMZM2G329229|GRMZM5G830545|GRMZM2G400602|XLOC_022844|GRMZM2G064563_T01|GRMZM2G151903|GRMZM2G021706|GRMZM2G077669|GRMZM2G122251|GRMZM6G654251_T01|GRMZM2G118821|GRMZM2G088964|GRMZM2G179349|G…
5730	0.00096295	0.0018212	3	15	nucleolus	GRMZM2G358076|H4C14|AC233865.1_FGT001
5783	0.001454	0.0026915	10	237	endoplasmic reticulum	GRMZM2G039365|GRMZM5G833406|GRMZM2G126505|GRMZM2G164318_T01|GRMZM2G179147|GRMZM2G003526_T01|GRMZM2G126505_T01|GRMZM2G039365_T06|GRMZM2G142409_T01|GRMZM2G179147_T02
9628	0.0029655	0.005375	40	1883	response to abiotic stimulus	GRMZM2G046849_T01|GRMZM2G301485|GRMZM2G154580|GRMZM2G176173|AC208204.3_FG006|GRMZM2G137046|GRMZM2G393272_T01|GRMZM2G140355_T01|GRMZM2G134334_T01|GRMZM2G012891_T01|GRMZM2G130348_T01|GRMZM2G175995_T01|GRMZM2G021777|GRMZM2G414192|GRMZM2G033098|GRMZM2G053669|GRMZM2G044359_T01|GRMZM2G007729|GRMZM2G033846_T01|GRMZM5G801627_T02|GRMZM2G004483_T01|GRMZM2G098167|GRMZM2G078472|GRMZM2G046382|GRMZM2G137046_T0…
6810	0.0034379	0.006104	72	3906	transport	GRMZM2G055545|GRMZM2G074540|GRMZM2G144083_T01|GRMZM2G055704|GRMZM2G001764|GRMZM2G055704_T01|GRMZM5G827496|GRMZM2G137046|GRMZM2G178356|GRMZM2G400602_T01|GRMZM5G805732|GRMZM2G059836_T01|XLOC_040321|GRMZM2G151903_T02|GRMZM2G136300_T01|GRMZM2G119967|GRMZM2G437859|GRMZM2G170734|GRMZM2G137046_T01|GRMZM2G118355|GRMZM2G087901|GRMZM6G654251|GRMZM2G329229|GRMZM5G830545|GRMZM2G400602|XLOC_022844|GRMZM2G0645…
5794	0.003882	0.0067547	6	111	Golgi apparatus	GRMZM2G026980|H4C14|GRMZM2G000587|AC233865.1_FGT001|GRMZM2G431006|GRMZM2G015654
15979	0.0050448	0.0086059	7	155	photosynthesis	GRMZM2G137498|GRMZM2G104549|GRMZM2G163809_T02|GRMZM2G414192|GRMZM2G081114|AC208915.3_FG010|GRMZM2G163809
3682	0.0059221	0.0099082	4	54	chromatin binding	GRMZM2G039586|GRMZM2G080274|XLOC_023395|GRMZM2G080274_T02
3677	0.030225	0.049614	83	5069	DNA binding	GRMZM2G078820|GRMZM2G005939_T01|GRMZM2G003466|GRMZM2G079632|GRMZM2G134334|GRMZM2G171912|DHN1|XLOC_040910|GRMZM2G123119|GRMZM2G142718|GRMZM2G155370_T01|GRMZM2G027478|GRMZM2G137046|AC193786.3_FG005|GRMZM2G171912_T01|GRMZM2G177229|GRMZM2G151826_T01|GRMZM5G853245_T03|XLOC_019670|GRMZM2G120320|GRMZM2G079632_T01|GRMZM2G358796|GRMZM2G164341|GRMZM2G027478_T02|GRMZM2G164020|GRMZM2G167018|GRMZM2G137498|GRM…
