# Supplementary material for: Transcriptome Analysis of Flowering Time Genes under Drought Stress in Maize Leaves
Source: Front Plant Sci. 2017 Mar 1;8:267. doi: 10.3389/fpls.2017.00267 (PMC5331056; doi:10.3389/fpls.2017.00267)
Supplement: Table S4 — Expression values of candidate flowering time genes from published data. [file Table4.XLSX]

## Sheet: Sheet1
Table S4. Expression values of candidate flowering time genes from published data.
Gene ID*	Locus	WW expression value	DS expression value	Log2 folding changes	Up/Down regulation	test_stat	p_value	q_value	significant	Annotation in MaizeGDB （http://www.maizegdb.org/)*
GRMZM2G154580	1:90223826-90226112	25.7253	102.977	2.00106	Up	5.65409	5e-05	0.00274723	yes	C5WSC6_SORBI Putative uncharacterized protein Sb01g029080 n=1 (Sorghum bicolor) Exp=4e-44; maizesequence.org: UniGene:Zm.131725; Clone 1561281 mRNA sequence
GRMZM2G062458	1:91197019-91202570	25.8783	65.7374	1.34497	Up	2.56152	5e-05	0.00274723	yes	B8BI66_ORYSI Putative uncharacterized protein n=1 (Oryza sativa subsp. indica) Exp=1e-59
GRMZM2G176173	4:25769174-25770329	5.31361	17.6319	1.73042	Up	4.14764	5e-05	0.00274723	yes	C0PJC1_MAIZE Putative uncharacterized protein n=1 (Zea mays) Exp=2e-89; maizesequence.org: Uniprot/SPTREMBL:C0PJC1; Putative uncharacterized protein | UniGene:Zm.100547; Hypothetical protein LOC100383826 | RefSeq_peptide:NP_001169929; hypothetical protein LOC100383826 | RefSeq_dna:NM_001176458; hypothetical protein LOC100383826 (LOC100383826) mRNA | GO:0008270; zinc ion binding | GO:0005622; intr…
GRMZM2G005459	8:158923100-158935921	30.8877	69.092	1.16149	Up	2.65297	0.0001	0.00509194	yes	B6UFA0_MAIZE RNA binding protein n=1 (Zea mays) Exp=0; maizesequence.org: UniGene:Zm.66849; LOC100286166 | RefSeq_peptide:NP_001152526; LOC100286166 | RefSeq_dna:NM_001159054; LOC100286166 (pco079656) mRNA | GO:0003723; RNA binding | GO:0003676; nucleic acid binding
GRMZM2G134941	8:4969861-4970303	1.06962	3.69772	1.78954	Up	2.21464	0.00145	0.0443486	yes	B6U460_MAIZE FPF1 n=2 (Andropogoneae) Exp=2e-43; maizesequence.org: EntrezGene:100285362; FPF1 | RefSeq_dna:NM_001158254; FPF1 (LOC100285362) mRNA | RefSeq_peptide:NP_001151726; FPF1 | Uniprot/SPTREMBL:B6U460; FPF1
GRMZM2G004483	9:115786739-115795356	38.1946	100.689	1.39847	Up	3.31884	5e-05	0.00274723	yes	C5WSC6_SORBI Putative uncharacterized protein Sb01g029080 n=1 (Sorghum bicolor) Exp=4e-50; maizesequence.org: GO:0016068; type I hypersensitivity
GRMZM2G069146	7:141174420-141175245	0.234143	1.21267	2.37273	Up	2.52392	0.00025	0.0110677	yes	Q3T5N0_SORBI Putative uncharacterized protein Sb02g030330 n=1 (Sorghum bicolor) Exp=2e-79; maizesequence.org: GO:0006355; regulation of transcription DNA-dependent | GO:0003700; transcription factor activity | GO:0003677; DNA binding
GRMZM2G047055	1:269100967-269103693	23.5291	92.4223	1.97379	Up	5.00686	5e-05	0.00274723	yes	No significant hits (1e-5); maizesequence.org: Uniprot/SPTREMBL:B6TQ08; Actin-1 | UniGene:Zm.96019; Transcribed locus strongly similar to NP_001067399.2 Os12g0641000 [Oryza sativa Japonica Group] | UniGene:Zm.95691; Transcribed locus strongly similar to NP_850611.1 ACT2 (ACTIN 2); structural constituent of cytoskeleton [Arabidopsis thaliana] | UniGene:Zm.95593; Transcribed locus strongly similar …
AC208915.3_FG010	3:223539564-223540344	0.25	0.60805	1.28226	Up	5.00686	5e-05	0.00274723	yes	CB48_MAIZE Chlorophyll a-b binding protein 48, chloroplastic n=3 (Zea mays) Exp=2e-135
GRMZM2G104549	3:223616641-223617812	2.74195	5.79535	1.07969	Up	1.99707	0.00095	0.0318984	yes	CB48_MAIZE Chlorophyll a-b binding protein 48, chloroplastic n=3 (Zea mays) Exp=4e-138; maizesequence.org: Uniprot/SPTREMBL:B6T2Y9; Chlorophyll a-b binding protein 2 | RefSeq_peptide:NP_001148439; chlorophyll a-b binding protein 2 | EntrezGene:100282054; chlorophyll a-b binding protein 2
GRMZM2G137046	5:112669914-112675317	13.2459	51.4612	1.95794	Up	5.19599	5e-05	0.00274723	yes	B6STM9_MAIZE Transcription factor HY5 n=3 (Andropogoneae) Exp=6e-52; maizesequence.org: RefSeq_dna:NM_001159011; LOC100286123 (gpm254) mRNA | RefSeq_peptide:NP_001147637; transcription factor HY5 | RefSeq_peptide:NP_001152483; LOC100286123 | UniGene:Zm.33196; LOC100286123 | Uniprot/SPTREMBL:B6STM9; Transcription factor HY5 | Uniprot/SPTREMBL:B6UEP1; Putative uncharacterized proteinTranscription f…
GRMZM2G389155	5:69335953-69337204	4.72081	9.98313	1.08046	Up	2.36612	5e-05	0.00274723	yes	Q6Z7B5_ORYSJ Putative COP1 n=2 (Oryza sativa) Exp=9e-127
GRMZM2G092363	10:54474925-54476332	12.5859	33.5945	1.41642	Up	3.85951	5e-05	0.00274723	yes	B6SZU8_MAIZE CONSTANS-like protein CO8 n=1 (Zea mays) Exp=1e-64; maizesequence.org: Uniprot/SPTREMBL:B6SZU8; CONSTANS-like protein CO8Putative uncharacterized protein ; | UniGene:Zm.143028; Hypothetical protein LOC100382541 | UniGene:Zm.12297; CONSTANS-like protein CO8 | RefSeq_peptide:NP_001168746; hypothetical protein LOC100382541 | RefSeq_peptide:NP_001148275; CONSTANS-like protein CO8 | RefSe…
GRMZM2G021777	5:183418225-183419769	49.8836	16.9691	-1.55566	Down	-4.60627	5e-05	0.00274723	yes	B6SU24_MAIZE CONSTANS-like protein CO5 n=1 (Zea mays) Exp=6e-131; maizesequence.org: Uniprot/SPTREMBL:B6SU24; CONSTANS-like protein CO5 | UniGene:Zm.27242; CONSTANS-like protein CO5 | UniGene:Zm.155913; Full-length cDNA clone ZM_BFb0210F07 | UniGene:Zm.141392; TSA: Zea mays contig15098 mRNA sequence | RefSeq_peptide:NP_001147679; CONSTANS-like protein CO5 | RefSeq_dna:NM_001154207; CONSTANS-like …
GRMZM2G414192	1:247786585-247788296	2.79247	0.950721	-1.55445	Down	-2.41588	5e-05	0.00274723	yes	CB23_ORYSJ Chlorophyll a-b binding protein, chloroplastic n=16 (Spermatophyta) Exp=1e-141; maizesequence.org: Uniprot/SPTREMBL:B6SZT9; Chlorophyll a-b binding proteinPutative uncharacterized protein ; | Uniprot/SPTREMBL:B6T1H1; Chlorophyll a-b binding protein | Uniprot/SPTREMBL:Q08057; Putative light-harvesting chlorophyll A/B binding protein Fragment | Uniprot/SPTREMBL:Q41823; Type II light-harv…
GRMZM2G012717	6:117553451-117557161	8.92389	1.81234	-2.29982	Down	-5.08224	5e-05	0.00274723	yes	C0P687_MAIZE Putative uncharacterized protein n=1 (Zea mays) Exp=0; maizesequence.org: Uniprot/SPTREMBL:C0P687; Putative uncharacterized protein | Uniprot/SPTREMBL:B7ZZ06; Putative uncharacterized protein | Uniprot/SPTREMBL:B4FPT2; Putative uncharacterized protein | UniGene:Zm.35863; Hypothetical protein LOC100272654 | RefSeq_peptide:NP_001140584; hypothetical protein LOC100272654 | RefSeq_dna:NM…
GRMZM2G161680	6:93659874-93665056	14.4088	6.05124	-1.25165	Down	-3.12411	5e-05	0.00274723	yes	B6TGA9_MAIZE Nuclear transcription factor Y subunit C-2 n=4 (Andropogoneae) Exp=2e-81; maizesequence.org: Uniprot/SPTREMBL:C0PEA5; Putative uncharacterized protein | Uniprot/SPTREMBL:B6TGA9; Nuclear transcription factor Y subunit C-2 | UniGene:Zm.100569; Nuclear transcription factor Y subunit C-2 | RefSeq_peptide:NP_001149626; nuclear transcription factor Y subunit C-2 | RefSeq_dna:NM_001156154; …
GRMZM2G107886	9:31881580-31883549	0.295058	0.0558264	-2.40198	Down	-2.42504	0.00085	0.029139	yes	B6TEI1_MAIZE Zinc finger protein CONSTANS-LIKE 16 n=1 (Zea mays) Exp=0; maizesequence.org: Uniprot/SPTREMBL:B6TEI1; Zinc finger protein CONSTANS-LIKE 16 | UniGene:Zm.133548; Zinc finger protein CONSTANS-LIKE 16 | RefSeq_peptide:NP_001149457; zinc finger protein CONSTANS-LIKE 16 | RefSeq_dna:NM_001155985; zinc finger protein CONSTANS-LIKE 16 (LOC100283083) mRNA | GO:0008270; zinc ion binding | GO:…
GRMZM2G142718	10:147840545-147845926	8.22763	3.77576	-1.12371	Down	-2.31482	5e-05	0.00274723	yes	B4FRV3_MAIZE Putative uncharacterized protein n=1 (Zea mays) Exp=3e-78; maizesequence.org: Uniprot/SPTREMBL:B4FRV3; Putative uncharacterized protein | UniGene:Zm.37976; Hypothetical protein LOC100272945 | RefSeq_peptide:NP_001140869; hypothetical protein LOC100272945 | RefSeq_dna:NM_001147397; hypothetical protein LOC100272945 (LOC100272945) mRNA | GO:0045449; regulation of transcription | GO:000…
GRMZM2G401342	1:11295302-11298152	0.0164228	0.00338685	-2.27768		0	1	1	no	C5WXV7_SORBI Putative uncharacterized protein Sb01g046870 n=1 (Sorghum bicolor) Exp=0
GRMZM2G159996	1:195589977-195594661	3.8563	2.22429	-0.793872		-1.72237	0.0031	0.0765419	no	C5YHP5_SORBI Putative uncharacterized protein Sb07g025940 n=1 (Sorghum bicolor) Exp=5e-177; maizesequence.org: GO:0005622; intracellular | GO:0008270; zinc ion binding | Uniprot/SPTREMBL:B8A3E1; Putative uncharacterized protein
AC217050.4_FG006	1:214949993-214953204	103.891	91.4356	-0.184243		-0.559679	0.3357	0.943885	no	14333_ORYSJ 14-3-3-like protein GF14-C n=12 (Poaceae) Exp=3e-131; maizesequence.org: Uniprot/SPTREMBL:Q6PLR9; 14-3-3-like protein | Uniprot/SPTREMBL:B6SRI4; 14-3-3-like proteinPutative uncharacterized protein ; | Uniprot/SPTREMBL:B6SHK4; 14-3-3-like protein | Uniprot/SPTREMBL:B6SHF0; 14-3-3-like protein | RefSeq_peptide:NP_001149400; 14-3-3-like protein | RefSeq_peptide:NP_001105677; 14-3-3-like …
GRMZM2G082484	1:224508801-224512075	2.03439	1.27193	-0.677577		-1.2139	0.03675	0.380672	no	D1IVV3_VITVI Whole genome shotgun sequence of line PN40024, scaffold_44.assembly12x (Fragment) n=1 (Vitis vinifera) Exp=0; maizesequence.org: Uniprot/SPTREMBL:C0HHR4; Putative uncharacterized protein | UniGene:Zm.93786; Transcribed locus strongly similar to NP_196543.1 ACT7 (ACTIN 7); structural constituent of cytoskeleton [Arabidopsis thaliana] | UniGene:Zm.80256; Hypothetical protein LOC1003816…
GRMZM2G449479	1:227642707-227656994	2.41513	2.41362	-0.000902291		-0.000984229	0.99865	0.999733	no	D1MF42_SORBI Actin-1-like protein (Fragment) n=3 (Poaceae) Exp=7e-59; maizesequence.org: GO:0005515; protein binding | GO:0005524; ATP binding
GRMZM2G099522	1:26671504-26681206	0.533664	0.445884	-0.259263		-0.329743	0.558	0.999071	no	Q6PL52_SETIT Leafy hull sterile 1 (Fragment) n=3 (Paniceae) Exp=5e-107; maizesequence.org: Uniprot/SPTREMBL:Q9M4P8; M14 protein Fragment | Uniprot/SPTREMBL:D3YBA5; MADS-domain transcription factor | Uniprot/SPTREMBL:D3YBA4; MADS-domain transcription factor | Uniprot/SPTREMBL:C0PNL1; Putative uncharacterized protein | Uniprot/SPTREMBL:B6T935; MADS-box transcription factor 1 | MaizeGDB_GenBank:AJ00…
GRMZM2G149923	1:275154533-275157007	2.61418	2.67942	0.0355623		0.059166	0.92035	0.999071	no	C5X184_SORBI Putative uncharacterized protein Sb01g008460 n=1 (Sorghum bicolor) Exp=3e-82; maizesequence.org: Uniprot/SPTREMBL:Q4KWL4; Putative calmodulin Fragment | Uniprot/SPTREMBL:B6TGU5; Calmodulin | UniGene:Zm.23479; Calmodulin-like | UniGene:Zm.131174; Transcribed locus strongly similar to NP_001051233.1 Os03g0743500 [Oryza sativa Japonica Group] | UniGene:Zm.131173; Transcribed locus stron…
GRMZM2G478779	1:287371112-287376243	0.0211375	0.25	3.56405		0	1	1	no	ACT11_ARATH Actin-11 n=9 (Viridiplantae) Exp=8e-72; maizesequence.org: GO:0019205; nucleobase nucleoside nucleotide kinase activity | GO:0006139; nucleobase nucleoside nucleotide and nucleic acid metabolic process | GO:0005524; ATP binding | GO:0005515; protein binding
GRMZM2G084540	1:65226515-65231900	71.4364	65.0725	-0.134611		-0.396595	0.4955	0.999071	no	C4J9J4_MAIZE Putative uncharacterized protein n=1 (Zea mays) Exp=0; maizesequence.org: Uniprot/SPTREMBL:C4J9J4; Putative uncharacterized protein | Uniprot/SPTREMBL:C0HIF8; Putative uncharacterized protein | UniGene:Zm.72835; Transcribed locus | GO:0003723; RNA binding
GRMZM2G180909	1:94881327-94884787	31.129	26.6736	-0.222847		-0.690634	0.2228	0.85012	no	B6TJ76_MAIZE Nucleic acid binding protein n=4 (Andropogoneae) Exp=0; maizesequence.org: EntrezGene:100283534; nucleic acid binding protein | GO:0003723; RNA binding | RefSeq_dna:NM_001156434; nucleic acid binding protein (LOC100283534) mRNA | RefSeq_peptide:NP_001149906; nucleic acid binding protein | Uniprot/SPTREMBL:B6TJ76; Nucleic acid binding protein | Uniprot/SPTREMBL:B8A3G9; Putative unchar…
GRMZM2G161913	2:16461517-16484071	14.5857	16.5383	0.181256		0.554974	0.3303	0.938953	no	C5YE49_SORBI Putative uncharacterized protein Sb06g025910 n=1 (Sorghum bicolor) Exp=0; maizesequence.org: UniGene:Zm.36304; Clone 1532203 mRNA sequence | UniGene:Zm.23038; TSA: Zea mays contig61309 mRNA sequence | UniGene:Zm.123709; TSA: Zea mays contig32112 mRNA sequence
GRMZM2G025924	2:170151407-170177849	13.421	14.0387	0.0649172		0.164271	0.7738	0.999071	no	C5X500_SORBI Putative uncharacterized protein Sb02g010210 n=1 (Sorghum bicolor) Exp=0; maizesequence.org: GO:0018024; histone-lysine N-methyltransferase activity | GO:0016568; chromatin modification | GO:0008270; zinc ion binding | GO:0005634; nucleus
GRMZM2G081812	2:199236105-199241897	70.6725	76.0214	0.105257		0.294148	0.6127	0.999071	no	C5X8E5_SORBI Putative uncharacterized protein Sb02g032810 n=2 (Andropogoneae) Exp=2e-169; maizesequence.org: GO:0005622; intracellular | GO:0008270; zinc ion binding
GRMZM2G039996	2:2020584-2022137	210.446	196.887	-0.0960822		-0.24634	0.6601	0.999071	no	Q7XV11_ORYSJ Os04g0457000 protein n=5 (Poaceae) Exp=1e-112; maizesequence.org: Uniprot/SPTREMBL:B4FXB0; Chlorophyll a-b binding protein CP24Putative uncharacterized protein ; | UniGene:Zm.82159; Chlorophyll a-b binding protein CP24 | UniGene:Zm.101882; Hypothetical protein LOC100273752 | RefSeq_peptide:NP_001148406; chlorophyll a-b binding protein CP24 | RefSeq_peptide:NP_001141632; hypothetical …
GRMZM2G360517	2:206714270-206724986	59.4842	55.1766	-0.10845		-0.235728	0.64165	0.999071	no	C5XC97_SORBI Putative uncharacterized protein Sb02g036890 n=1 (Sorghum bicolor) Exp=0; maizesequence.org: Uniprot/SPTREMBL:C0HID9; Putative uncharacterized protein | UniGene:Zm.32316; Transcribed locus moderately similar to XP_002463057.1 hypothetical protein SORBIDRAFT_02g036890 [Sorghum bicolor] | UniGene:Zm.2634; Hypothetical protein LOC100381721 | RefSeq_peptide:NP_001168000; hypothetical pro…
GRMZM2G474468	2:216708663-216709103	1.50017	1.39373	-0.106175		-0.128203	0.82475	0.999071	no	C5X4Y0_SORBI Putative uncharacterized protein Sb02g042480 n=1 (Sorghum bicolor) Exp=3e-46; maizesequence.org: UniGene:Zm.145579; TSA: Zea mays contig46156 mRNA sequence
GRMZM2G033962	2:219403695-219442172	1.83073	2.33784	0.352757		0.665862	0.25025	0.875702	no	PRR37_ORYSJ Two-component response regulator-like PRR37 n=2 (Oryza sativa) Exp=0; maizesequence.org: UniGene:Zm.29366; Transcribed locus weakly similar to XP_002446346.1 hypothetical protein SORBIDRAFT_06g014570 [Sorghum bicolor] | GO:0006355; regulation of transcription DNA-dependent | GO:0000160; two-component signal transduction system (phosphorelay) | GO:0000156; two-component response regula…
GRMZM2G149428	2:220058171-220060652	706.305	781.048	0.14512		0.261142	0.63375	0.999071	no	Q41746_MAIZE Chlorophyll a/b-binding apoprotein CP26 n=4 (Andropogoneae) Exp=7e-140; maizesequence.org: UniGene:Zm.144536; TSA: Zea mays contig54425 mRNA sequence | UniGene:Zm.156721; Chlorophyll a/b-binding apoprotein CP26 precursor | UniGene:Zm.99433; Transcribed locus moderately similar to NP_001067593.1 Os11g0242800 [Oryza sativa Japonica Group] | Uniprot/SPTREMBL:B4FL55; Putative uncharacter…
GRMZM2G008765	2:233063938-233075629	49.83	46.5524	-0.098159		-0.298032	0.6023	0.999071	no	B4FBL9_MAIZE Putative uncharacterized protein n=1 (Zea mays) Exp=6e-144; maizesequence.org: Uniprot/SPTREMBL:B4FBL9; Putative uncharacterized protein | UniGene:Zm.84886; Hypothetical protein LOC100192510 | RefSeq_peptide:NP_001131202; hypothetical protein LOC100192510 | RefSeq_dna:NM_001137730; hypothetical protein LOC100192510 (LOC100192510) mRNA | GO:0006396; RNA processing | EntrezGene:1001925…
GRMZM2G437445	2:233563273-233565668	4.69142	4.63237	-0.0182742		-0.043256	0.94145	0.999071	no	B8AWW7_ORYSI Putative uncharacterized protein n=1 (Oryza sativa subsp. indica) Exp=1e-107; maizesequence.org: GO:0005524; ATP binding | GO:0005515; protein binding
GRMZM2G012546	2:234774051-234776937	28.3803	22.1642	-0.356659		-1.05223	0.0762	0.551552	no	C5XA90_SORBI Putative uncharacterized protein Sb02g003580 n=1 (Sorghum bicolor) Exp=2e-142; maizesequence.org: UniGene:Zm.43396; Hypothetical protein LOC100384704 | RefSeq_peptide:NP_001170650; hypothetical protein LOC100384704 | RefSeq_dna:NM_001177179; hypothetical protein LOC100384704 (LOC100384704) mRNA | GO:0016787; hydrolase activity | GO:0008152; metabolic process
GRMZM2G047590	2:3371443-3377730	37.6758	33.4039	-0.173622		-0.518695	0.3733	0.96482	no	C5Y9Y9_SORBI Putative uncharacterized protein Sb06g031895 (Fragment) n=1 (Sorghum bicolor) Exp=2e-64
GRMZM2G107588	2:52944286-52947699	12.0125	13.1159	0.12678		0.29981	0.59495	0.999071	no	B6SQ52_MAIZE COP9 signalosome complex subunit 8 n=3 (Andropogoneae) Exp=4e-101; maizesequence.org: Uniprot/SPTREMBL:B4FX41; Putative uncharacterized protein | UniGene:Zm.2938; Hypothetical protein LOC100273709 | RefSeq_peptide:NP_001141592; hypothetical protein LOC100273709 | RefSeq_dna:NM_001148120; hypothetical protein LOC100273709 (LOC100273709) mRNA | EntrezGene:100273709; hypothetical protei…
GRMZM2G138750	3:11218170-11221842	0.830999	0.956372	0.202725		0.312477	0.57565	0.999071	no	B6U8A2_MAIZE Cytochrome P450 CYP734A8 n=2 (Andropogoneae) Exp=0; maizesequence.org: Uniprot/SPTREMBL:B6U8A2; Cytochrome P450 CYP734A8 | UniGene:Zm.37378; Hypothetical protein LOC100382270 | GO:0055114; oxidation reduction | GO:0020037; heme binding | GO:0009055; electron carrier activity | GO:0005506; iron ion binding | GO:0004497; monooxygenase activity
GRMZM2G021471	3:134042853-134051194	6.75217	7.7622	0.201114		0.536464	0.3343	0.942562	no	C5YPA1_SORBI Putative uncharacterized protein Sb08g016860 n=3 (Andropogoneae) Exp=0; maizesequence.org: UniGene:Zm.18574; TSA: Zea mays contig11577 mRNA sequence
GRMZM2G336909	3:156842891-156857661	12.2543	11.3669	-0.108449		-0.287743	0.61615	0.999071	no	Q8L821_MAIZE SET domain-containing protein SET118 n=2 (Andropogoneae) Exp=0; maizesequence.org: Uniprot/SPTREMBL:C0PI92; Putative uncharacterized protein | RefSeq_peptide:NP_001169786; hypothetical protein LOC100383674 | RefSeq_dna:NM_001176315; hypothetical protein LOC100383674 (LOC100383674) mRNA | GO:0018024; histone-lysine N-methyltransferase activity | GO:0016568; chromatin modification | GO…
GRMZM2G320013	3:194070043-194076117	20.6086	21.6435	0.0706873		0.2193	0.70305	0.999071	no	B4FKP9_MAIZE Putative uncharacterized protein n=1 (Zea mays) Exp=3e-150; maizesequence.org: Uniprot/SPTREMBL:B4FKP9; Putative uncharacterized protein | UniGene:Zm.94432; Hypothetical protein LOC100216960 | UniGene:Zm.26018; Clone 506757 mRNA sequence | UniGene:Zm.144141; TSA: Zea mays contig57544 mRNA sequence | RefSeq_peptide:NP_001136814; hypothetical protein LOC100216960 | RefSeq_dna:NM_001143…
GRMZM2G055905	3:206930806-206936573	30.501	35.0577	0.200875		0.603145	0.28815	0.908348	no	FYPP1_ARATH Phytochrome-associated serine/threonine protein phosphatase 1 n=16 (Embryophyta) Exp=3e-168; maizesequence.org: Uniprot/SPTREMBL:C0PAS3; Serine/threonine-protein phosphatase (EC 3.1.3.16) | Uniprot/SPTREMBL:B4G063; Putative uncharacterized protein | Uniprot/SPTREMBL:B4FVS0; Serine/threonine-protein phosphatase (EC 3.1.3.16) | UniGene:Zm.16843; Hypothetical protein LOC100382798 | RefSe…
GRMZM2G045275	3:218979524-218985381	42.593	39.7356	-0.100184		-0.304036	0.5936	0.999071	no	C0PGT6_MAIZE Putative uncharacterized protein n=1 (Zea mays) Exp=0; maizesequence.org: Uniprot/SPTREMBL:C0PGT6; Putative uncharacterized protein | UniGene:Zm.96117; Hypothetical protein LOC100383534 | UniGene:Zm.149368; TSA: Zea mays contig17377 mRNA sequence | RefSeq_peptide:NP_001169653; hypothetical protein LOC100383534 | RefSeq_dna:NM_001176182; hypothetical protein LOC100383534 (LOC100383534…
GRMZM2G104262	4:124002435-124006457	25.1479	23.4273	-0.102247		-0.316758	0.5822	0.999071	no	C1KGA5_MAIZE Cryptochrome 1 n=1 (Zea mays) Exp=0; maizesequence.org: GO:0003913; DNA photolyase activity | GO:0006281; DNA repair | Uniprot/SPTREMBL:C9DQ39; Cryptochrome 2
GRMZM2G360389	4:141550232-141554985	0.143218	0.178313	0.316199		0	1	1	no	C5XXR5_SORBI Putative uncharacterized protein Sb04g026310 n=1 (Sorghum bicolor) Exp=7e-118
GRMZM2G015875	4:161101811-161108392	18.0315	20.878	0.211464		0.64538	0.2669	0.891406	no	Q7XXP7_ORYSJ Os02g0709900 protein n=3 (Oryza sativa) Exp=0; maizesequence.org: UniGene:Zm.143177; TSA: Zea mays contig64553 mRNA sequence | UniGene:Zm.94058; TSA: Zea mays contig06959 mRNA sequence
GRMZM2G075124	4:172109686-172119147	95.4368	105.222	0.140819		0.383703	0.50225	0.999071	no	Q6K988_ORYSJ Os02g0810400 protein n=6 (Poaceae) Exp=0; maizesequence.org: UniGene:Zm.132803; TSA: Zea mays contig22665 mRNA sequence | UniGene:Zm.148344; TSA: Zea mays contig22118 mRNA sequence | UniGene:Zm.148430; TSA: Zea mays contig21715 mRNA sequence | UniGene:Zm.6716; Hypothetical protein LOC100192492 | Uniprot/SPTREMBL:B4FBJ3; Putative uncharacterized protein | RefSeq_peptide:NP_001131184; …
GRMZM2G116376	4:213568314-213571277	0.177853	0.33671	0.920821		1.14396	0.05295	0.459605	no	B6TS26_MAIZE Serine/threonine-protein kinase WNK4 n=3 (Andropogoneae) Exp=0; maizesequence.org: Uniprot/SPTREMBL:C4J8T1; Putative uncharacterized protein | Uniprot/SPTREMBL:B6TS26; Serine/threonine-protein kinase WNK4 | UniGene:Zm.17862; Serine/threonine-protein kinase WNK4 | RefSeq_peptide:NP_001150656; serine/threonine-protein kinase WNK4 | RefSeq_dna:NM_001157184; serine/threonine-protein kina…
GRMZM2G169927	4:240029478-240048763	16.3791	15.9675	-0.0367176		-0.10129	0.86	0.999071	no	C5XUJ2_SORBI Putative uncharacterized protein Sb04g003160 n=2 (Andropogoneae) Exp=0; maizesequence.org: Uniprot/SPTREMBL:C0PIU4; Putative uncharacterized protein | UniGene:Zm.24459; Hypothetical protein LOC100383756 | RefSeq_peptide:NP_001169862; hypothetical protein LOC100383756 | RefSeq_dna:NM_001176391; hypothetical protein LOC100383756 (LOC100383756) mRNA | GO:0008168; methyltransferase activ…
GRMZM2G324643	4:37602662-37604582	31.4665	32.9033	0.0644156		0.187213	0.74615	0.999071	no	CML7_ORYSJ Probable calcium-binding protein CML7 n=6 (Poaceae) Exp=4e-76; maizesequence.org: Uniprot/SPTREMBL:B4FNQ8; CalmodulinPutative uncharacterized protein ; | RefSeq_peptide:NP_001140401; hypothetical protein LOC100272455 | GO:0005509; calcium ion binding | EntrezGene:100272455; hypothetical protein LOC100272455
GRMZM2G145213	4:5967056-5972575	1.99291	2.72924	0.453623		0.864487	0.1302	0.698537	no	B6TED9_MAIZE 14-3-3-like protein n=3 (Andropogoneae) Exp=3e-136; maizesequence.org: Uniprot/SPTREMBL:B6TED9; 14-3-3-like protein | Uniprot/SPTREMBL:B4FEW4; Putative uncharacterized protein | UniGene:Zm.4318; 14-3-3-like protein | UniGene:Zm.138361; Hypothetical protein LOC100193401 | RefSeq_peptide:NP_001149445; 14-3-3-like protein | RefSeq_peptide:NP_001131998; hypothetical protein LOC100193401 …
GRMZM2G091155	4:81728689-81732613	343.655	268.8	-0.354428		-0.87238	0.1253	0.686828	no	14333_ORYSJ 14-3-3-like protein GF14-C n=12 (Poaceae) Exp=1e-56; maizesequence.org: GO:0019904; protein domain specific binding | UniGene:Zm.99639; Transcribed locus strongly similar to NP_001061856.1 Os08g0430500 [Oryza sativa Japonica Group]
GRMZM2G459166	5:177714944-177716366	1.03688	1.26068	0.281953		0.4499	0.42265	0.987921	no	B6TE19_MAIZE F-box protein GID2 n=1 (Zea mays) Exp=7e-60; maizesequence.org: Uniprot/SPTREMBL:B6TE19; F-box protein GID2 | UniGene:Zm.124969; F-box protein GID2 | RefSeq_peptide:NP_001149408; F-box protein GID2 | RefSeq_dna:NM_001155936; F-box protein GID2 (LOC100283034) mRNA | EntrezGene:100283034; F-box protein GID2
GRMZM2G380184	5:207105595-207113838	8.06161	9.47462	0.233		0.608017	0.2838	0.904737	no	Q6YWY5_ORYSJ Os02g0746000 protein n=3 (Poaceae) Exp=0; maizesequence.org: UniGene:Zm.84995; Clone EL01T0402H09.c mRNA sequence | UniGene:Zm.145777; TSA: Zea mays contig44725 mRNA sequence | GO:0031625; ubiquitin protein ligase binding | GO:0031461; cullin-RING ubiquitin ligase complex | GO:0006511; ubiquitin-dependent protein catabolic process
GRMZM2G059958	5:208475605-208480259	2.25376	2.32045	0.0420707		0.093304	0.8718	0.999071	no	C5XYD3_SORBI Putative uncharacterized protein Sb04g027490 n=1 (Sorghum bicolor) Exp=0; maizesequence.org: UniGene:Zm.36843; Hypothetical protein LOC100383264 | RefSeq_dna:NM_001175924; hypothetical protein LOC100383264 (LOC100383264) mRNA | GO:0055114; oxidation reduction | GO:0016491; oxidoreductase activity
GRMZM2G030169	5:23036168-23039886	0.661422	0.344587	-0.940703		-1.28507	0.02225	0.28298	no	D1IVV3_VITVI Whole genome shotgun sequence of line PN40024, scaffold_44.assembly12x (Fragment) n=1 (Vitis vinifera) Exp=0; maizesequence.org: Uniprot/SPTREMBL:B6SI11; Actin-2 | UniGene:Zm.98155; Actin-2 | RefSeq_peptide:NP_001146931; actin-2 | RefSeq_dna:NM_001153459; actin-2 (LOC100280540) mRNA | GO:0005524; ATP binding | GO:0005515; protein binding | EntrezGene:100280540; actin-2
GRMZM2G165209	5:2745756-2750912	19.7181	17.2466	-0.193209		-0.562443	0.3306	0.939042	no	C5WV47_SORBI Putative uncharacterized protein Sb01g003500 n=2 (Andropogoneae) Exp=8e-122; maizesequence.org: Uniprot/SPTREMBL:B4FP72; Putative uncharacterized protein | UniGene:Zm.139463; Hypothetical protein LOC100272540 | RefSeq_peptide:NP_001140480; hypothetical protein LOC100272540 | RefSeq_dna:NM_001147008; hypothetical protein LOC100272540 (LOC100272540) mRNA | EntrezGene:100272540; hypothe…
GRMZM2G015861	5:31838647-31848111	18.4827	18.6833	0.0155738		0.0431064	0.94065	0.999071	no	B6TLR0_MAIZE ATARP7 n=1 (Zea mays) Exp=0; maizesequence.org: GO:0005515; protein binding | Uniprot/SPTREMBL:C4JA12; Putative uncharacterized protein
GRMZM2G096972	5:77128764-77133951	9.91246	11.0862	0.16145		0.49848	0.38475	0.970938	no	Q6YXY3_ORYSJ Putative splicing factor 3b, subunit 3, 130kDa n=4 (Poaceae) Exp=0; maizesequence.org: Uniprot/SPTREMBL:B4FNJ3; Putative uncharacterized protein | UniGene:Zm.32175; Transcribed locus strongly similar to NP_001045829.2 Os02g0137400 [Oryza sativa Japonica Group] | UniGene:Zm.16807; Hypothetical protein LOC100272422 | UniGene:Zm.155278; TSA: Zea mays contig30075 mRNA sequence | UniGene:…
GRMZM2G147800	5:80751624-80757053	51.612	59.1751	0.197284		0.588739	0.3009	0.918402	no	C5XUQ2_SORBI Putative uncharacterized protein Sb04g003660 n=1 (Sorghum bicolor) Exp=0; maizesequence.org: UniGene:Zm.25440; TSA: Zea mays contig30718 mRNA sequence | UniGene:Zm.123059; TSA: Zea mays contig41713 mRNA sequence | GO:0005515; protein binding
GRMZM2G425774	5:80864504-80872473	10.4523	9.25451	-0.175592		-0.518653	0.36625	0.959837	no	C5XUQ8_SORBI Putative uncharacterized protein Sb04g003700 n=1 (Sorghum bicolor) Exp=0; maizesequence.org: RefSeq_dna:NM_001138545; hypothetical protein LOC100193423 (LOC100193423) mRNA | UniGene:Zm.137125; Transcribed locus moderately similar to NP_001045918.1 Os02g0152500 [Oryza sativa Japonica Group] | UniGene:Zm.17853; Hypothetical protein LOC100193423 | Uniprot/SPTREMBL:B7ZX21; Putative uncha…
GRMZM2G148772	5:89751515-89753301	82.8914	81.7337	-0.0202914		-0.0632934	0.91295	0.999071	no	C5XW99_SORBI Putative uncharacterized protein Sb04g005250 n=1 (Sorghum bicolor) Exp=4e-95; maizesequence.org: UniGene:Zm.85703; Transcribed locus moderately similar to XP_002451648.1 hypothetical protein SORBIDRAFT_04g005250 [Sorghum bicolor] | UniGene:Zm.155190; TSA: Zea mays contig30451 mRNA sequence | UniGene:Zm.143437; TSA: Zea mays contig62726 mRNA sequence | GO:0016021; integral to membrane…
GRMZM2G148772	5:89751515-89753301	82.8914	81.7337	-0.0202914		-0.0632934	0.91295	0.999071	no	C5XW99_SORBI Putative uncharacterized protein Sb04g005250 n=1 (Sorghum bicolor) Exp=4e-95; maizesequence.org: UniGene:Zm.85703; Transcribed locus moderately similar to XP_002451648.1 hypothetical protein SORBIDRAFT_04g005250 [Sorghum bicolor] | UniGene:Zm.155190; TSA: Zea mays contig30451 mRNA sequence | UniGene:Zm.143437; TSA: Zea mays contig62726 mRNA sequence | GO:0016021; integral to membrane…
GRMZM2G325679	6:110707123-110714886	5.27627	5.93112	0.168786		0.411214	0.47895	0.999071	no	C0PDQ2_MAIZE Putative uncharacterized protein n=1 (Zea mays) Exp=4e-151; maizesequence.org: GO:0003723; RNA binding
GRMZM2G173630	6:146310946-146313512	55.6025	67.5524	0.280857		0.84888	0.1374	0.713737	no	B0S4S8_SORBI Putative GID1-like gibberellin receptor n=4 (Andropogoneae) Exp=0; maizesequence.org: Uniprot/SPTREMBL:B0S4S6; Putative GID1-like gibberellin receptor | UniGene:Zm.141614; TSA: Zea mays contig32337 mRNA sequence | GO:0016787; hydrolase activity | GO:0008152; metabolic process
GRMZM2G363116	6:146755714-146756826	0.858899	0.932378	0.118426		0.155356	0.7828	0.999071	no	C5YXT6_SORBI Putative uncharacterized protein Sb09g020220 n=1 (Sorghum bicolor) Exp=8e-153; maizesequence.org: GO:0008152; metabolic process | GO:0016787; hydrolase activity | UniGene:Zm.37739; Clone 273797 mRNA sequence
AC209636.2_FG003	6:146759981-146761061	0.0841818	0.234328	1.47695		1.1511	0.06905	0.525521	no	B6U9V9_MAIZE Hsr203J n=2 (Andropogoneae) Exp=1e-162; maizesequence.org: Uniprot/SPTREMBL:B6U9V9; Hsr203J | RefSeq_peptide:NP_001152160; hsr203J | GO:0016787; hydrolase activity | GO:0016021; integral to membrane | GO:0008152; metabolic process | GO:0007186; G-protein coupled receptor protein signaling pathway | GO:0004982; N-formyl peptide receptor activity | EntrezGene:100285798; hsr203J
GRMZM2G145556	6:165593301-165602782	10.2599	11.6557	0.184019		0.570683	0.321	0.932981	no	C5YVZ7_SORBI Putative uncharacterized protein Sb09g029030 n=1 (Sorghum bicolor) Exp=0; maizesequence.org: Uniprot/SPTREMBL:C0PMZ9; Putative uncharacterized protein | UniGene:Zm.80907; Hypothetical protein LOC100384276 | RefSeq_peptide:NP_001170311; hypothetical protein LOC100384276 | RefSeq_dna:NM_001176840; hypothetical protein LOC100384276 (LOC100384276) mRNA | GO:0006468; protein amino acid ph…
AC233870.1_FG003	6:167230846-167236984	4.71374	4.42643	-0.0907286		-0.16323	0.77235	0.999071	no	C5YX17_SORBI Putative uncharacterized protein Sb09g030700 n=1 (Sorghum bicolor) Exp=0; maizesequence.org: GO:0006364; rRNA processing
AC233870.1_FG003	6:167230846-167236984	4.71374	4.42643	-0.0907286		-0.16323	0.77235	0.999071	no	C5YX17_SORBI Putative uncharacterized protein Sb09g030700 n=1 (Sorghum bicolor) Exp=0; maizesequence.org: GO:0006364; rRNA processing
GRMZM2G312970	6:39821915-39827376	5.98472	6.56936	0.134469		0.357895	0.5298	0.999071	no	C5YYE0_SORBI Putative uncharacterized protein Sb09g000920 n=1 (Sorghum bicolor) Exp=0; maizesequence.org: UniGene:Zm.60582; Transcribed locus | UniGene:Zm.151060; TSA: Zea mays contig09408 mRNA sequence | UniGene:Zm.12972; TSA: Zea mays contig49768 mRNA sequence | GO:0006468; protein amino acid phosphorylation | GO:0005524; ATP binding | GO:0004707; MAP kinase activity | GO:0004674; protein serin…
GRMZM2G391364	6:4899726-4900501	32.9349	32.1949	-0.032785		-0.0928081	0.8748	0.999071	no	CML7_ORYSJ Probable calcium-binding protein CML7 n=6 (Poaceae) Exp=2e-76; maizesequence.org: Uniprot/SPTREMBL:B6T4U8; Calmodulin | RefSeq_peptide:NP_001148586; LOC100282202 | RefSeq_dna:NM_001155114; LOC100282202 (umc2698) mRNA | GO:0005509; calcium ion binding | EntrezGene:100282202; LOC100282202
GRMZM2G025646	7:106257739-106259917	1.0067	0.671435	-0.584314		-0.878322	0.13365	0.707355	no	B6TE20_MAIZE EARLY flowering 4 protein n=2 (Zea mays) Exp=6e-48; maizesequence.org: Uniprot/SPTREMBL:B6TE20; EARLY flowering 4 protein | Uniprot/SPTREMBL:B4FX35; ELF4-like proteinPutative uncharacterized protein ;
GRMZM2G179024	7:143149722-143155478	137.997	193.957	0.4911		1.22356	0.03345	0.362141	no	B4FWH6_MAIZE Putative uncharacterized protein n=1 (Zea mays) Exp=0; maizesequence.org: Uniprot/SPTREMBL:B4FWH6; Putative uncharacterized protein | UniGene:Zm.118086; Hypothetical protein LOC100273598 | RefSeq_peptide:NP_001141486; hypothetical protein LOC100273598 | RefSeq_dna:NM_001148014; hypothetical protein LOC100273598 (LOC100273598) mRNA | GO:0006355; regulation of transcription DNA-depende…
GRMZM2G161611	7:150696089-150699478	102.113	97.5732	-0.0656097		-0.19875	0.7278	0.999071	no	Q84RS4_ORYSJ Os07g0495100 protein n=10 (Poaceae) Exp=1e-132; maizesequence.org: RefSeq_peptide:NP_001149821; casein kinase II subunit beta-4 | Uniprot/SPTREMBL:B6TGH2; Casein kinase II subunit beta-4 | Uniprot/SPTREMBL:B6TIH0; Casein kinase II subunit beta-4 | Uniprot/SPTREMBL:B6TNU8; Casein kinase II subunit beta-4 | Uniprot/SPTREMBL:C0PC77; Putative uncharacterized protein | Uniprot/SPTREMBL:Q9…
GRMZM2G135790	7:151882165-151890288	22.4661	23.1736	0.0447325		0.130736	0.82155	0.999071	no	C5X9D5_SORBI Putative uncharacterized protein Sb02g034300 n=2 (Andropogoneae) Exp=8e-126; maizesequence.org: Uniprot/SPTREMBL:B8A3R3; Putative uncharacterized protein | Uniprot/SPTREMBL:C0PIP7; Putative uncharacterized protein
GRMZM2G033885	7:157314546-157315990	1334.6	1409.06	0.0783256		0.122047	0.8257	0.999071	no	Q6Z411_ORYSJ Os07g0558400 protein n=7 (Poaceae) Exp=5e-150; maizesequence.org: Uniprot/SPTREMBL:O24561; Chlorophyll a/b-binding protein CP29Putative uncharacterized protein Precursor ; | Uniprot/SPTREMBL:B6TPJ9; Putative uncharacterized protein | Uniprot/SPTREMBL:B4FJG1; Putative uncharacterized protein | RefSeq_peptide:NP_001136606; hypothetical protein LOC100216729 | RefSeq_peptide:NP_001105502…
GRMZM2G072506	7:160281447-160290097	17.117	16.7287	-0.0331045		-0.0889362	0.8759	0.999071	no	B6T544_MAIZE Ubiquitin-conjugating enzyme E2 E3 n=4 (Andropogoneae) Exp=1e-78; maizesequence.org: Uniprot/SPTREMBL:B6SPY0; Putative uncharacterized proteinUbiquitin-conjugating enzyme E2 E3 ; | UniGene:Zm.137655; Ubiquitin-conjugating enzyme E2 E3 | RefSeq_peptide:NP_001147334; ubiquitin-conjugating enzyme E2 E3 | RefSeq_dna:NM_001153862; ubiquitin-conjugating enzyme E2 E3 (LOC100280942) mRNA | G…
GRMZM2G072280	7:160294592-160298064	954.616	1075.48	0.171988		0.292403	0.6021	0.999071	no	B6T892_MAIZE Chlorophyll a-b binding protein n=2 (Zea mays) Exp=8e-124; maizesequence.org: EntrezGene:100282512; chlorophyll a-b binding protein | RefSeq_peptide:NP_001148893; chlorophyll a-b binding protein | Uniprot/SPTREMBL:B4F9W3; Putative uncharacterized protein | Uniprot/SPTREMBL:B6T892; Chlorophyll a-b binding protein
GRMZM2G023444	7:161376265-161378737	1.94506	1.79482	-0.115975		-0.205593	0.71785	0.999071	no	B6U4T7_MAIZE Serine/threonine-protein kinase WNK2 n=3 (Andropogoneae) Exp=6e-168; maizesequence.org: Uniprot/SPTREMBL:B6U4T7; Serine/threonine-protein kinase WNK2 | Uniprot/SPTREMBL:B4FUQ8; Putative uncharacterized protein | UniGene:Zm.117463; Transcribed locus strongly similar to NP_001141251.1 hypothetical protein LOC100273338 [Zea mays] | RefSeq_peptide:NP_001141251; hypothetical protein LOC10…
GRMZM2G342386	7:174486605-174495553	17.4337	17.9848	0.0448993		0.126866	0.8276	0.999071	no	ARP2_ORYSJ Actin-related protein 2 n=6 (Magnoliophyta) Exp=2e-175; maizesequence.org: UniGene:Zm.35337; TSA: Zea mays contig11739 mRNA sequence | UniGene:Zm.152412; TSA: Zea mays contig02884 mRNA sequence | UniGene:Zm.147510; TSA: Zea mays contig25859 mRNA sequence | GO:0005515; protein binding
GRMZM2G134284	7:174832007-174855086	37.0162	36.1665	-0.0335028		-0.0769804	0.8958	0.999071	no	Q69R94_ORYSJ Os07g0693900 protein n=2 (Oryza sativa) Exp=0; maizesequence.org: GO:0005488; binding
AC233961.1_FG001	7:20251125-20258924	16.3775	15.7761	-0.0539745		-0.166229	0.7693	0.999071	no	B8A298_MAIZE Putative uncharacterized protein n=1 (Zea mays) Exp=0; maizesequence.org: GO:0018024; histone-lysine N-methyltransferase activity | Uniprot/SPTREMBL:B8A298; Putative uncharacterized protein | UniGene:Zm.2765; LOC100280164 | RefSeq_peptide:NP_001146568; hypothetical protein LOC100280164 | RefSeq_dna:NM_001153096; LOC100280164 (sdg101) mRNA | GO:0016568; chromatin modification | GO:000…
GRMZM2G142168	7:68467237-68474379	5.59873	7.18453	0.359794		1.04641	0.07105	0.534596	no	C5X5W7_SORBI Putative uncharacterized protein Sb02g011680 n=1 (Sorghum bicolor) Exp=0; maizesequence.org: UniGene:Zm.152150; TSA: Zea mays contig04137 mRNA sequence | UniGene:Zm.155822; Transcribed locus moderately similar to XP_002461984.1 hypothetical protein SORBIDRAFT_02g011680 [Sorghum bicolor] | UniGene:Zm.6861; Hypothetical protein LOC100304225
GRMZM2G406014	7:6922570-6924041	4.69771	4.38622	-0.0989795		-0.214133	0.7006	0.999071	no	C5XA88_SORBI Putative uncharacterized protein Sb02g003560 n=1 (Sorghum bicolor) Exp=5e-67; maizesequence.org: UniGene:Zm.34378; Hypothetical protein LOC100384024 | RefSeq_dna:NM_001176634; hypothetical protein LOC100384024 (LOC100384024) mRNA | GO:0016021; integral to membrane | GO:0007186; G-protein coupled receptor protein signaling pathway | GO:0004938; alpha2-adrenergic receptor activity
GRMZM2G006716	7:6991141-6992292	0.00872272	0.022067	1.33904		0	1	1	no	C5XA92_SORBI Putative uncharacterized protein Sb02g003600 n=1 (Sorghum bicolor) Exp=4e-151; maizesequence.org: GO:0008152; metabolic process | GO:0016787; hydrolase activity
GRMZM2G164454	7:7012086-7013388	19.0286	14.2402	-0.4182		-1.18682	0.0464	0.429718	no	B4FIC9_MAIZE Putative uncharacterized protein n=1 (Zea mays) Exp=0; maizesequence.org: Uniprot/SPTREMBL:B4FIC9; Putative uncharacterized protein | UniGene:Zm.120038; Hypothetical protein LOC100194343 | RefSeq_peptide:NP_001132851; hypothetical protein LOC100194343 | RefSeq_dna:NM_001139379; hypothetical protein LOC100194343 (LOC100194343) mRNA | GO:0016787; hydrolase activity | GO:0008152; metabo…
GRMZM2G106903	7:82745637-82758385	23.601	19.3153	-0.289104		-0.765158	0.12395	0.684149	no	C5X8Y4_SORBI Putative uncharacterized protein Sb02g020460 n=1 (Sorghum bicolor) Exp=0; maizesequence.org: UniGene:Zm.99470; TSA: Zea mays contig63896 mRNA sequence | UniGene:Zm.82385; Hypothetical protein LOC100383418 | UniGene:Zm.6219; Transcribed locus | UniGene:Zm.145526; TSA: Zea mays contig46611 mRNA sequence | GO:0003676; nucleic acid binding
GRMZM2G101852	8:109900130-109904668	17.9346	15.5293	-0.207753		-0.604244	0.29975	0.918308	no	Q60EU0_ORYSJ Os05g0238200 protein n=6 (Poaceae) Exp=3e-173; maizesequence.org: Uniprot/SPTREMBL:B6TPS9; Ubiquitin ligase SINAT3 | Uniprot/SPTREMBL:B3F0K9; SINA5 | UniGene:Zm.67249; SINA5 | RefSeq_peptide:NP_001123594; SINA5 | RefSeq_dna:NM_001130122; SINA5 (LOC100170241) mRNA | GO:0008270; zinc ion binding | GO:0007275; multicellular organismal development | EntrezGene:100170241; SINA5 | GenBank:…
GRMZM2G140577	8:119354311-119364877	17.6001	16.1019	-0.128353		-0.391556	0.4932	0.999071	no	Q8LPU2_MAIZE SET domain protein 105 n=3 (Andropogoneae) Exp=0; maizesequence.org: Uniprot/SPTREMBL:Q8LPU2; SET domain protein 105 | Uniprot/SPTREMBL:B6U899; Histone-lysine N-methyltransferase H3 lysine-9 specific SUVH1 | UniGene:Zm.5630; LOC542085 | RefSeq_peptide:NP_001105189; LOC542085 | RefSeq_dna:NM_001111719; LOC542085 (cl3507_2a) mRNA | GO:0018024; histone-lysine N-methyltransferase activit…
GRMZM2G067985	8:134054892-134084240	306.745	296.986	-0.0466449		-0.112511	0.84755	0.999071	no	B8AWW7_ORYSI Putative uncharacterized protein n=1 (Oryza sativa subsp. indica) Exp=3e-87; maizesequence.org: GO:0005515; protein binding | GO:0005524; ATP binding
GRMZM2G054380	8:159782942-159797629	1.24752	1.02894	-0.277904		-0.171384	0.8115	0.999071	no	Q8L821_MAIZE SET domain-containing protein SET118 n=2 (Andropogoneae) Exp=1e-69; maizesequence.org: Uniprot/SPTREMBL:B8A0N0; Putative uncharacterized protein
GRMZM2G407517	8:18251119-18256611	5.35628	5.07833	-0.0768772		-0.195636	0.73005	0.999071	no	D1MF42_SORBI Actin-1-like protein (Fragment) n=3 (Poaceae) Exp=1e-112; maizesequence.org: GO:0005515; protein binding | GO:0005524; ATP binding
GRMZM2G359322	9:123215069-123216079	1.2997	0.857385	-0.600164		-0.793782	0.166	0.764969	no	C5WWN3_SORBI ELF4-like protein n=4 (Andropogoneae) Exp=6e-49; maizesequence.org: Uniprot/SPTREMBL:B6SH35; EARLY flowering 4 proteinPutative uncharacterized protein ; | RefSeq_peptide:NP_001151033; EARLY flowering 4 protein | EntrezGene:100284666; EARLY flowering 4 protein
GRMZM2G040278	9:149144803-149145737	0.0109971	0.0146322	0.412024		0	1	1	no	B6TRD7_MAIZE F-box protein GID2 n=2 (Zea mays) Exp=3e-43; maizesequence.org: Uniprot/SPTREMBL:C0PDX0; Putative uncharacterized protein | Uniprot/SPTREMBL:B6TRD7; F-box protein GID2 | UniGene:Zm.30720; F-box protein GID2 | RefSeq_peptide:NP_001150591; F-box protein GID2 | RefSeq_dna:NM_001157119; F-box protein GID2 (LOC100284224) mRNA | GO:0050826; response to freezing | GO:0050825; ice binding | …
GRMZM2G057743	9:56072031-56104991	4.51988	4.79343	0.0847739		0.213409	0.71555	0.999071	no	C0PDQ2_MAIZE Putative uncharacterized protein n=1 (Zea mays) Exp=3e-164; maizesequence.org: UniGene:Zm.124246; TSA: Zea mays contig62955 mRNA sequence | GO:0003723; RNA binding
GRMZM2G084547	10:101729923-101733147	32.9806	28.4363	-0.213884		-0.60186	0.2928	0.912769	no	B6TQC5_MAIZE Peptidyl-prolyl cis-trans isomerase 1 n=2 (Andropogoneae) Exp=6e-65; maizesequence.org: EntrezGene:100284136; peptidyl-prolyl cis-trans isomerase 1 | GO:0016853; isomerase activity | RefSeq_dna:NM_001157033; peptidyl-prolyl cis-trans isomerase 1 (LOC100284136) mRNA | RefSeq_peptide:NP_001150505; peptidyl-prolyl cis-trans isomerase 1 | Uniprot/SPTREMBL:B6TQC5; Peptidyl-prolyl cis-tran…
GRMZM2G072107	10:130394406-130402050	3.5877	3.86074	0.105818		0.231356	0.68215	0.999071	no	C0HHQ8_MAIZE Putative uncharacterized protein n=2 (Zea mays) Exp=0; maizesequence.org: GO:0006468; protein amino acid phosphorylation | GO:0005524; ATP binding | GO:0004674; protein serine/threonine kinase activity | GO:0004672; protein kinase activity
GRMZM2G150248	10:147028224-147032518	6.13464	5.7653	-0.089583		-0.224271	0.697	0.999071	no	B6SV76_MAIZE Lysine-specific histone demethylase 1 n=4 (Andropogoneae) Exp=0; maizesequence.org: UniGene:Zm.156045; Hypothetical protein LOC100384102 | UniGene:Zm.8135; Hypothetical protein LOC100384522 | Uniprot/SPTREMBL:B6SV76; Lysine-specific histone demethylase 1 | Uniprot/SPTREMBL:B6SW44; Lysine-specific histone demethylase 1 | Uniprot/SPTREMBL:C0PLI4; Putative uncharacterized protein | Unip…
GRMZM2G018485	10:134624801-134626574	0.0556329	0.124007	1.15641		0	1	1	no	C5YEI6_SORBI Putative uncharacterized protein Sb06g026370 n=1 (Sorghum bicolor) Exp=4e-119; maizesequence.org: GO:0050826; response to freezing | GO:0050825; ice binding | GO:0042309; homoiothermy | GO:0006412; translation | GO:0006355; regulation of transcription DNA-dependent | GO:0005840; ribosome | GO:0005622; intracellular | GO:0003735; structural constituent of ribosome | GO:0003677; DNA bi…
GRMZM2G082227	1:4541345-4544263	0.757491	0.821908	0.117748		0.174164	0.7607	0.999071	no	C5X0X2_SORBI Putative uncharacterized protein Sb01g049150 n=1 (Sorghum bicolor) Exp=5e-100; maizesequence.org: UniGene:Zm.31375; Transcribed locus moderately similar to XP_002468620.1 hypothetical protein SORBIDRAFT_01g049150 [Sorghum bicolor] | GO:0006355; regulation of transcription DNA-dependent | GO:0003677; DNA binding
GRMZM2G099797	1:28417830-28422778	8.77962	9.52158	0.117042		0.306034	0.5944	0.999071	no	Q948L2_MAIZE Response regulator 10 n=4 (Andropogoneae) Exp=0; maizesequence.org: Uniprot/SPTREMBL:Q9AV93; Response regulator 8Two-component response regulator ARR1 ; | Uniprot/SPTREMBL:C0P2S9; Putative uncharacterized protein | UniGene:Zm.5932; Response regulator 8 | RefSeq_peptide:NP_001104861; response regulator 8 | RefSeq_dna:NM_001111391; response regulator 8 (RR8) mRNA | GO:0006355; regulati…
GRMZM2G177220	3:165939857-165943821	5.55486	6.19399	0.157119		0.408845	0.4803	0.999071	no	B6UC09_MAIZE Two-component response regulator ARR11 n=2 (Andropogoneae) Exp=0; maizesequence.org: Uniprot/SPTREMBL:B6UC09; Two-component response regulator ARR11 | UniGene:Zm.97951; Two-component response regulator ARR11 | RefSeq_peptide:NP_001152300; two-component response regulator ARR11 | RefSeq_dna:NM_001158828; two-component response regulator ARR11 (LOC100285939) mRNA | GO:0006355; regulati…
GRMZM2G100318	8:163128903-163133200	15.5642	15.7574	0.0177981		0.0539738	0.9259	0.999071	no	B6UC09_MAIZE Two-component response regulator ARR11 n=2 (Andropogoneae) Exp=0; maizesequence.org: UniGene:Zm.124389; Full-length cDNA clone ZM_BFb0323F19 | GO:0006355; regulation of transcription DNA-dependent | GO:0000160; two-component signal transduction system (phosphorelay) | GO:0000156; two-component response regulator activity
GRMZM2G062541	10:87703634-87706828	12.1477	16.8491	0.471988		1.35091	0.0175	0.244982	no	C5YZL9_SORBI Putative uncharacterized protein Sb09g003090 n=1 (Sorghum bicolor) Exp=4e-111; maizesequence.org: UniGene:Zm.151876; TSA: Zea mays contig05464 mRNA sequence | GO:0045449; regulation of transcription | GO:0030528; transcription regulator activity | GO:0005634; nucleus
GRMZM2G017349	9:16492658-16496592	1.60533	1.2776	-0.329434		-0.592125	0.30455	0.92159	no	B4FE22_MAIZE Putative uncharacterized protein n=1 (Zea mays) Exp=2e-120; maizesequence.org: Uniprot/SPTREMBL:B4FE22; Putative uncharacterized protein | UniGene:Zm.96541; Hypothetical protein LOC100193167 | RefSeq_peptide:NP_001131794; hypothetical protein LOC100193167 | RefSeq_dna:NM_001138322; hypothetical protein LOC100193167 (LOC100193167) mRNA | GO:0045449; regulation of transcription | GO:00…
GRMZM2G080168	4:17257179-17259695	5.8517	7.34936	0.328763		0.808177	0.1573	0.74846	no	B4FIT4_MAIZE Putative uncharacterized protein n=1 (Zea mays) Exp=0; maizesequence.org: Uniprot/SPTREMBL:C0P5U1; Putative uncharacterized protein | Uniprot/SPTREMBL:B4FIT4; Putative uncharacterized protein | UniGene:Zm.18099; Hypothetical protein LOC100216597 | RefSeq_peptide:NP_001136483; hypothetical protein LOC100216597 | RefSeq_dna:NM_001143011; hypothetical protein LOC100216597 (LOC100216597)…
GRMZM2G180406	3:162105904-162109184	7.11611	7.24127	0.0251539		0.0679564	0.9011	0.999071	no	B4G0X6_MAIZE Putative uncharacterized protein n=2 (Zea mays) Exp=0; maizesequence.org: Uniprot/SPTREMBL:B6UFP6; Putative uncharacterized protein | Uniprot/SPTREMBL:B4G0X6; Putative uncharacterized protein | UniGene:Zm.122711; Hypothetical protein LOC100382035 | RefSeq_peptide:NP_001168271; hypothetical protein LOC100382035 | RefSeq_peptide:NP_001145523; hypothetical protein LOC100278938 | RefSeq_…
GRMZM2G171818	2:221338745-221341097	0.882429	1.49223	0.757918		1.27228	0.0286	0.328841	no	B6UBF8_MAIZE BHLH transcription factor n=1 (Zea mays) Exp=0; maizesequence.org: Uniprot/SPTREMBL:B6UBF8; BHLH transcription factor | UniGene:Zm.28345; BHLH transcription factor | RefSeq_peptide:NP_001152266; BHLH transcription factor | RefSeq_dna:NM_001158794; BHLH transcription factor (LOC100285905) mRNA | GO:0045449; regulation of transcription | GO:0030528; transcription regulator activity | G…
GRMZM2G115960	3:48806990-48811144	58.7174	50.1341	-0.227996		-0.677818	0.23475	0.858989	no	C0P7Y0_MAIZE Putative uncharacterized protein n=2 (Zea mays) Exp=0; maizesequence.org: Uniprot/SPTREMBL:C0P7Y0; Putative uncharacterized protein | UniGene:Zm.47586; Transcribed locus | RefSeq_peptide:NP_001168665; hypothetical protein LOC100382453 | RefSeq_dna:NM_001175194; hypothetical protein LOC100382453 (LOC100382453) mRNA | GO:0050826; response to freezing | GO:0050825; ice binding | GO:0045…
GRMZM2G008898	2:233050784-233053965	0.343119	0.202655	-0.759683		-0.846913	0.13575	0.711287	no	C5XCJ1_SORBI Putative uncharacterized protein Sb02g005713 (Fragment) n=1 (Sorghum bicolor) Exp=4e-80; maizesequence.org: UniGene:Zm.86460; Clone 1471495 mRNA sequence | GO:0045449; regulation of transcription | GO:0030528; transcription regulator activity | GO:0005634; nucleus
GRMZM2G478417	1:199519464-199525707	12.0959	8.73064	-0.470359		-1.28952	0.02615	0.312698	no	B4FRB4_MAIZE BZIP transcription factor ABI5 n=1 (Zea mays) Exp=4e-113; maizesequence.org: UniGene:Zm.133210; TSA: Zea mays contig29569 mRNA sequence | GO:0046983; protein dimerization activity | GO:0043565; sequence-specific DNA binding | GO:0006355; regulation of transcription DNA-dependent | GO:0005634; nucleus | GO:0003700; transcription factor activity | GO:0003677; DNA binding
GRMZM2G077124	7:174320995-174323831	0.539908	0.476629	-0.179847		-0.238149	0.68425	0.999071	no	B6UEX5_MAIZE EEL n=2 (Zea mays) Exp=5e-76; maizesequence.org: UniGene:Zm.19325; Hypothetical protein LOC100191211 | RefSeq_dna:NM_001136645; hypothetical protein LOC100191211 (LOC100191211) mRNA | GO:0043565; sequence-specific DNA binding | GO:0006355; regulation of transcription DNA-dependent | GO:0003700; transcription factor activity
GRMZM2G104396	3:123431301-123438348	8.7082	10.6335	0.28817		0.748248	0.19145	0.808551	no	B6TY54_MAIZE Nuclear transcription factor Y subunit A-7 n=3 (Andropogoneae) Exp=2e-92; maizesequence.org: RefSeq_dna:NM_001175907; hypothetical protein LOC100383246 (LOC100383246) mRNA | RefSeq_peptide:NP_001169378; hypothetical protein LOC100383246 | UniGene:Zm.124260; Hypothetical protein LOC100383246 | Uniprot/SPTREMBL:C0PEF7; Putative uncharacterized protein | GO:0016602; CCAAT-binding factor…
GRMZM2G096016	2:235103648-235106245	0.0714829	0.0470723	-0.60272		0	1	1	no	B6TTA2_MAIZE Nuclear transcription factor Y subunit A-10 n=1 (Zea mays) Exp=2e-109; maizesequence.org: Uniprot/SPTREMBL:B6UCQ8; Nuclear transcription factor Y subunit A-10 | Uniprot/SPTREMBL:B6TTA2; Nuclear transcription factor Y subunit A-10 | RefSeq_peptide:NP_001152344; nuclear transcription factor Y subunit A-10 | RefSeq_peptide:NP_001150775; nuclear transcription factor Y subunit A-10 | RefS…
GRMZM2G303465	3:182472590-182474866	21.1114	20.6028	-0.0351818		-0.10051	0.8619	0.999071	no	B6UBN3_MAIZE Nuclear transcription factor Y subunit B-3 n=2 (Andropogoneae) Exp=5e-48; maizesequence.org: GO:0003677; DNA binding | GO:0005622; intracellular | GO:0005634; nucleus | GO:0006355; regulation of transcription DNA-dependent | GO:0043565; sequence-specific DNA binding
GRMZM2G022162	2:189855072-189858562	0.00811154	0.00834763	0.0413908		0	1	1	no	Q0J0W2_ORYSJ Os09g0480700 protein (Fragment) n=2 (Oryza sativa subsp. japonica) Exp=8e-35; maizesequence.org: GO:0003677; DNA binding | GO:0005622; intracellular | GO:0042309; homoiothermy | GO:0043565; sequence-specific DNA binding | GO:0050825; ice binding | GO:0050826; response to freezing
GRMZM2G099461	3:9072833-9073771	0.0703143	0.0601488	-0.225282		0	1	1	no	B6U0K8_MAIZE Histone-like transcription factor and archaeal histone family protein n=1 (Zea mays) Exp=2e-43; maizesequence.org: Uniprot/SPTREMBL:B6U0K8; Histone-like transcription factor and archaeal histone family protein | GO:0043565; sequence-specific DNA binding | GO:0005622; intracellular | GO:0003677; DNA binding
GRMZM2G083964	1:298942486-298959321	2.97516	2.51332	-0.243373		-0.486375	0.404	0.979087	no	C5WS18_SORBI Putative uncharacterized protein Sb01g000900 n=1 (Sorghum bicolor) Exp=3e-42; maizesequence.org: UniGene:Zm.26697; TSA: Zea mays contig16818 mRNA sequence | GO:0043565; sequence-specific DNA binding | GO:0006334; nucleosome assembly | GO:0005622; intracellular | GO:0003677; DNA binding | GO:0000786; nucleosome
GRMZM2G311316	10:57549400-57557195	2.43824	2.68087	0.136861		0.123752	0.8534	0.999071	no	B4FWZ1_MAIZE Nuclear transcription factor Y subunit C-2 n=1 (Zea mays) Exp=3e-97; maizesequence.org: EntrezGene:100273685; hypothetical protein LOC100273685 | Uniprot/SPTREMBL:B4FWZ1; Nuclear transcription factor Y subunit C-2Putative uncharacterized protein ; | UniGene:Zm.38583; Hypothetical protein LOC100273685 | RefSeq_peptide:NP_001141569; hypothetical protein LOC100273685 | RefSeq_dna:NM_001…
GRMZM2G375448	8:163213350-163214685	0.189693	0.0848543	-1.16061		0	1	1	no	B6SZS1_MAIZE Nuclear transcription factor Y subunit C-9 n=1 (Zea mays) Exp=2e-46; maizesequence.org: Uniprot/SPTREMBL:B6SZS1; Nuclear transcription factor Y subunit C-9 | UniGene:Zm.125120; Nuclear transcription factor Y subunit C-9 | RefSeq_peptide:NP_001148266; nuclear transcription factor Y subunit C-9 | RefSeq_dna:NM_001154794; nuclear transcription factor Y subunit C-9 (LOC100281874) mRNA | …
GRMZM2G064426	8:117330070-117333953	20.5968	18.4892	-0.155737		-0.424466	0.46305	0.999071	no	NFYB_MAIZE Nuclear transcription factor Y subunit B n=4 (Zea mays) Exp=2e-77; maizesequence.org: GO:0043565; sequence-specific DNA binding | GO:0006355; regulation of transcription DNA-dependent | GO:0005634; nucleus | GO:0005622; intracellular | GO:0003677; DNA binding
GRMZM2G147712	4:72873165-72879736	10.3666	10.354	-0.00175458		-0.00478462	0.9942	0.999184	no	B6T9D2_MAIZE Repressor protein n=2 (Zea mays) Exp=2e-81; maizesequence.org: Uniprot/SPTREMBL:B6T9D2; Repressor protein | Uniprot/SPTREMBL:B4F864; Putative uncharacterized protein | UniGene:Zm.66861; Hypothetical protein LOC100191260 | RefSeq_peptide:NP_001130166; hypothetical protein LOC100191260 | RefSeq_dna:NM_001136694; hypothetical protein LOC100191260 (LOC100191260) mRNA | GO:0043565; sequen…
GRMZM2G047855	1:279484877-279490883	53.9342	55.4708	0.0405281		0.125882	0.82365	0.999071	no	B6F107_ORYSJ Casein kinase II alpha subunit n=17 (Poaceae) Exp=2e-179; maizesequence.org: Uniprot/SPTREMBL:Q9ZR52; Casein kinase II alpha subunit | Uniprot/SPTREMBL:B6TGC0; Casein kinase II subunit alpha-2Putative uncharacterized protein ; | RefSeq_peptide:NP_001105486; CK2 protein kinase alpha 2 | RefSeq_dna:NM_001112016; CK2 protein kinase alpha 2 (cka2) mRNA | GO:0006468; protein amino acid ph…
GRMZM2G013398	9:39579381-39585286	2.05884	1.97915	-0.0569508		-0.102268	0.85735	0.999071	no	B6TCQ2_MAIZE CCT motif family protein n=2 (Andropogoneae) Exp=2e-41; maizesequence.org: UniGene:Zm.99275; TSA: Zea mays contig26219 mRNA sequence
AC233888.1_FG002	10:127941746-127942849	59.8319	54.5679	-0.132862		-0.406018	0.4804	0.999071	no	C5YBH3_SORBI Putative uncharacterized protein Sb06g021480 n=1 (Sorghum bicolor) Exp=2e-116; maizesequence.org: GO:0005622; intracellular | GO:0008270; zinc ion binding | UniGene:Zm.144681; TSA: Zea mays contig53212 mRNA sequence
AC233888.1_FG002	10:127941746-127942849	59.8319	54.5679	-0.132862		-0.406018	0.4804	0.999071	no	C5YBH3_SORBI Putative uncharacterized protein Sb06g021480 n=1 (Sorghum bicolor) Exp=2e-116; maizesequence.org: GO:0005622; intracellular | GO:0008270; zinc ion binding | UniGene:Zm.144681; TSA: Zea mays contig53212 mRNA sequence
GRMZM2G405368	9:35635307-35639846	23.8102	22.8084	-0.0620145		-0.177812	0.75785	0.999071	no	B5KPX5_MAIZE Hd1 n=3 (Zea mays) Exp=9e-164; maizesequence.org: Uniprot/SPTREMBL:B5KPX5; Hd1 | Uniprot/SPTREMBL:B4FAP7; Putative uncharacterized protein | Uniprot/SPTREMBL:B1NW31; Constans | Uniprot/SPTREMBL:B1NW30; Constans | UniGene:Zm.118116; Constans | RefSeq_peptide:NP_001120722; constans | RefSeq_dna:NM_001127250; constans (conz1) mRNA | GO:0008270; zinc ion binding | EntrezGene:100147736; c…
GRMZM2G162749	1:14850151-14853035	116.186	61.6501	-0.914261		-2.67165	5e-05	0.00274723	yes	B4FDH4_MAIZE Putative uncharacterized protein n=2 (Zea mays) Exp=0; maizesequence.org: Uniprot/SPTREMBL:B6SWQ6; Putative uncharacterized protein | Uniprot/SPTREMBL:B4FDH4; Putative uncharacterized protein | UniGene:Zm.24939; Hypothetical protein LOC100193013 | UniGene:Zm.154390; TSA: Zea mays contig33840 mRNA sequence | RefSeq_peptide:NP_001131653; hypothetical protein LOC100193013 | RefSeq_dna:N…
GRMZM2G171852	5:194883930-194887929	6.58096	7.03602	0.0964615		0.259582	0.651	0.999071	no	C5Y1A1_SORBI Putative uncharacterized protein Sb04g032040 n=3 (Andropogoneae) Exp=1e-109; maizesequence.org: Uniprot/SPTREMBL:B6SPI7; Putative uncharacterized protein | Uniprot/SPTREMBL:B6SN41; Putative uncharacterized protein | UniGene:Zm.143163; TSA: Zea mays contig64662 mRNA sequence | UniGene:Zm.124664; Hypothetical protein LOC100275168 | RefSeq_peptide:NP_001142794; hypothetical protein LOC1…
GRMZM2G017470	1:293404946-293407746	1.82437	2.56634	0.492314		0.975093	0.08965	0.589232	no	B6SV34_MAIZE Putative uncharacterized protein n=1 (Zea mays) Exp=6e-157; maizesequence.org: Uniprot/SPTREMBL:C0P2I6; Putative uncharacterized protein | Uniprot/SPTREMBL:B6SV34; Putative uncharacterized protein | UniGene:Zm.34333; Hypothetical protein LOC100275540 | RefSeq_peptide:NP_001143068; hypothetical protein LOC100275540 | RefSeq_dna:NM_001149596; hypothetical protein LOC100275540 (LOC10027…
AC233935.1_FG005	1:40917125-40919158	7.98387	6.92934	-0.20437		-0.492432	0.3902	0.973207	no	C4J0S6_MAIZE Putative uncharacterized protein n=1 (Zea mays) Exp=1e-128; maizesequence.org: Uniprot/SPTREMBL:C4J0S6; Putative uncharacterized protein | UniGene:Zm.28245; Full-length cDNA clone ZM_BFb0112H18 | GO:0045449; regulation of transcription | GO:0008270; zinc ion binding | GO:0003677; DNA binding
GRMZM2G144172	5:2336486-2338861	0.951103	1.15328	0.278069		0.447781	0.42465	0.98887	no	C5WV12_SORBI Putative uncharacterized protein Sb01g003210 n=1 (Sorghum bicolor) Exp=7e-109; maizesequence.org: UniGene:Zm.34380; Full-length cDNA clone ZM_BFb0218L20 | UniGene:Zm.145186; TSA: Zea mays contig49202 mRNA sequence | GO:0045449; regulation of transcription | GO:0008270; zinc ion binding | GO:0003677; DNA binding
AC209819.3_FG009	8:122590334-122590955	0.0162975	0.0934197	2.51908		0	1	1	no	C5Z0X3_SORBI Putative uncharacterized protein Sb09g025450 n=1 (Sorghum bicolor) Exp=2e-50; maizesequence.org: UniGene:Zm.131948; Clone 439697 mRNA sequence | GO:0045449; regulation of transcription | GO:0008270; zinc ion binding | GO:0003677; DNA binding
AC209819.3_FG009	8:122590334-122590955	0.0162975	0.0934197	2.51908		0	1	1	no	C5Z0X3_SORBI Putative uncharacterized protein Sb09g025450 n=1 (Sorghum bicolor) Exp=2e-50; maizesequence.org: UniGene:Zm.131948; Clone 439697 mRNA sequence | GO:0045449; regulation of transcription | GO:0008270; zinc ion binding | GO:0003677; DNA binding
AC155434.2_FG006	7:173847600-173853199	49.4562	49.7706	0.00914239		0.0274019	0.96295	0.999071	no	C0P8G4_MAIZE Putative uncharacterized protein n=1 (Zea mays) Exp=0; maizesequence.org: Uniprot/SPTREMBL:C0P8G4; Putative uncharacterized protein | Uniprot/SPTREMBL:B6T7K6; Putative uncharacterized protein | UniGene:Zm.19280; Hypothetical protein LOC100276261 | RefSeq_peptide:NP_001143564; hypothetical protein LOC100276261 | RefSeq_dna:NM_001150092; hypothetical protein LOC100276261 (LOC100276261)…
GRMZM2G378490	3:6300723-6302028	6.54926	9.01799	0.461474		1.05125	0.0612	0.495193	no	C5XLX9_SORBI Putative uncharacterized protein Sb03g003050 n=1 (Sorghum bicolor) Exp=1e-62; maizesequence.org: UniGene:Zm.34442; Hypothetical protein LOC100381674 | RefSeq_peptide:NP_001167958; hypothetical protein LOC100381674 | RefSeq_dna:NM_001174487; hypothetical protein LOC100381674 (LOC100381674) mRNA | GO:0045449; regulation of transcription | GO:0008270; zinc ion binding | GO:0004386; heli…
GRMZM2G463525	3:44597813-44601358	1.30265	1.02682	-0.343266		-0.618879	0.28165	0.903637	no	C5XH96_SORBI Putative uncharacterized protein Sb03g011160 n=1 (Sorghum bicolor) Exp=0; maizesequence.org: UniGene:Zm.30240; Full-length cDNA clone ZM_BFb0150D22 | GO:0045449; regulation of transcription | GO:0009424; bacterial-type flagellum hook | GO:0009296; flagellum assembly | GO:0008270; zinc ion binding | GO:0003774; motor activity | GO:0003677; DNA binding
GRMZM2G449950	4:164205528-164206744	21.7903	32.0872	0.558312		1.58062	0.0064	0.12903	no	B6SRT8_MAIZE Putative uncharacterized protein n=1 (Zea mays) Exp=2e-78; maizesequence.org: Uniprot/SPTREMBL:B6SRT8; Putative uncharacterized protein | UniGene:Zm.66956; Hypothetical protein LOC100275361 | RefSeq_peptide:NP_001142926; hypothetical protein LOC100275361 | RefSeq_dna:NM_001149454; hypothetical protein LOC100275361 (LOC100275361) mRNA | GO:0045449; regulation of transcription | GO:000…
GRMZM5G861678	8:158299003-158303170	10.4939	11.8221	0.171935		0.451541	0.4329	0.990381	no	No significant hits (1e-5)
GRMZM2G042756	2:16543814-16545074	0.00632064	0.031088	2.29822		0	1	1	no	B6STH9_MAIZE Dehydration-responsive element-binding protein 1D n=1 (Zea mays) Exp=4e-101; maizesequence.org: Uniprot/SPTREMBL:B6STH9; Dehydration-responsive element-binding protein 1D | UniGene:Zm.1524; Dehydration-responsive element-binding protein 1D | RefSeq_peptide:NP_001147630; dehydration-responsive element-binding protein 1D | RefSeq_dna:NM_001154158; dehydration-responsive element-binding…
GRMZM2G076602	10:144776766-144781012	5.45909	4.27468	-0.352844		-0.810418	0.15995	0.75408	no	C0P327_MAIZE Putative uncharacterized protein n=1 (Zea mays) Exp=2e-84; maizesequence.org: Uniprot/SPTREMBL:C0P327; Putative uncharacterized protein | UniGene:Zm.138897; Hypothetical protein LOC100381947 | RefSeq_peptide:NP_001168191; hypothetical protein LOC100381947 | RefSeq_dna:NM_001174720; hypothetical protein LOC100381947 (LOC100381947) mRNA | GO:0016021; integral to membrane | GO:0007186; …
GRMZM2G069126	7:141170322-141171382	0.0169671	0.0166399	-0.0280932		0	1	1	no	C3UZ68_MAIZE DRE-binding protein 3 n=2 (Zea mays) Exp=2e-82; maizesequence.org: Uniprot/SPTREMBL:C3UZ68; DRE-binding protein 3 | Uniprot/SPTREMBL:B6SLT3; SbCBF6 | UniGene:Zm.149623; TSA: Zea mays contig16236 mRNA sequence | UniGene:Zm.143804; TSA: Zea mays contig59939 mRNA sequence | UniGene:Zm.133840; Clone 377277 mRNA sequence | UniGene:Zm.128370; SbCBF6 | RefSeq_peptide:NP_001147172; sbCBF6 | …
GRMZM2G086573	2:4666314-4671738	0.0175301	0.0231928	0.403843		0	1	1	no	C5Y9G7_SORBI Putative uncharacterized protein Sb06g031120 n=1 (Sorghum bicolor) Exp=8e-154; maizesequence.org: Uniprot/SPTREMBL:C0PLP6; Putative uncharacterized protein | UniGene:Zm.2945; Hypothetical protein LOC100384122 | UniGene:Zm.156780; TSA: Zea mays contig48911 mRNA sequence | UniGene:Zm.151169; TSA: Zea mays contig08828 mRNA sequence | UniGene:Zm.144917; TSA: Zea mays contig51455 mRNA seq…
GRMZM2G069082	7:141162776-141163747	0.0198388	0.0170159	-0.221441		0	1	1	no	B4FP17_MAIZE Putative uncharacterized protein n=1 (Zea mays) Exp=3e-89; maizesequence.org: Uniprot/SPTREMBL:B4FP17; Putative uncharacterized protein | UniGene:Zm.100584; Hypothetical protein LOC100272507 | RefSeq_peptide:NP_001140448; hypothetical protein LOC100272507 | RefSeq_dna:NM_001146976; hypothetical protein LOC100272507 (LOC100272507) mRNA | GO:0006355; regulation of transcription DNA-dep…
GRMZM2G146688	2:237250178-237253121	0.0309146	0.0332359	0.104454		0	1	1	no	C5X8R2_SORBI Putative uncharacterized protein Sb02g002080 n=1 (Sorghum bicolor) Exp=3e-94; maizesequence.org: UniGene:Zm.155808; Full-length cDNA clone ZM_BFb0030E18 | GO:0006355; regulation of transcription DNA-dependent | GO:0003700; transcription factor activity | GO:0003677; DNA binding
GRMZM2G368838	2:16555807-16557224	0.0272024	0.25	3.20012		0	1	1	no	B6SSN6_MAIZE Ap2/EREBP transcription factor n=1 (Zea mays) Exp=7e-52; maizesequence.org: Uniprot/SPTREMBL:B6SSN6; Ap2/EREBP transcription factor | UniGene:Zm.128168; Ap2/EREBP transcription factor | RefSeq_peptide:NP_001147542; ap2/EREBP transcription factor | RefSeq_dna:NM_001154070; ap2/EREBP transcription factor (LOC100281151) mRNA | GO:0050826; response to freezing | GO:0050825; ice binding |…
GRMZM2G129154	8:158560399-158562023	1.10528	1.10731	0.00264728		0.00424186	0.9927	0.999184	no	B6SV05_MAIZE GRAS family transcription factor containing protein n=2 (Andropogoneae) Exp=0; maizesequence.org: GO:0050826; response to freezing | GO:0050825; ice binding | GO:0042309; homoiothermy
GRMZM2G176537	10:117338431-117340217	0.0212506	0.0256798	0.27313		0	1	1	no	UPI0000DD90AE Os04g0432100 n=1 (Oryza sativa subsp. japonica) Exp=1e-103; maizesequence.org: UniGene:Zm.147296; TSA: Zea mays contig26790 mRNA sequence
GRMZM2G051785	9:27346188-27348215	5.06233	5.12943	0.018997		0.0450253	0.93315	0.999071	no	B4FQS8_MAIZE Putative uncharacterized protein n=1 (Zea mays) Exp=0; maizesequence.org: Uniprot/SPTREMBL:B6UAV5; Scarecrow-like 6 | Uniprot/SPTREMBL:B4FQS8; Putative uncharacterized protein | Uniprot/SPTREMBL:B4FQ21; Putative uncharacterized protein | UniGene:Zm.5383; Hypothetical protein LOC100272800 | RefSeq_peptide:NP_001140725; hypothetical protein LOC100272800 | RefSeq_dna:NM_001147253; hypot…
GRMZM2G079470	1:88488421-88491040	30.8717	28.1627	-0.132499		-0.41269	0.4693	0.999071	no	C5WSJ8_SORBI Putative uncharacterized protein Sb01g029650 n=1 (Sorghum bicolor) Exp=0; maizesequence.org: Uniprot/SPTREMBL:B4FZI4; Putative uncharacterized protein | UniGene:Zm.41077; Full-length cDNA clone ZM_BFc0091E14 | UniGene:Zm.152211; TSA: Zea mays contig03833 mRNA sequence | UniGene:Zm.143751; TSA: Zea mays contig60303 mRNA sequence | UniGene:Zm.11682; Hypothetical protein LOC100274201 | …
AC234164.1_FG004	9:24984784-24987244	0.0376012	0.0266965	-0.494128		0	1	1	no	C5Z374_SORBI Putative uncharacterized protein Sb10g001690 n=1 (Sorghum bicolor) Exp=0
GRMZM2G146018	3:142759879-142761574	0.25	0.0047845	-5.70742		0	1	1	no	C5YS98_SORBI Putative uncharacterized protein Sb08g003950 n=1 (Sorghum bicolor) Exp=2e-125
GRMZM2G055263	1:37809277-37810975	0.0376189	0.0180027	-1.06324		0	1	1	no	C5WQ66_SORBI Putative uncharacterized protein Sb01g040270 n=1 (Sorghum bicolor) Exp=0
GRMZM2G013016	3:166194239-166195917	0.0352502	0.0529378	0.586667		0	1	1	no	C5XFG6_SORBI Putative uncharacterized protein Sb03g043030 n=1 (Sorghum bicolor) Exp=0
GRMZM2G046021	5:33838740-33844703	14.3892	15.3215	0.0905712		0.248573	0.6499	0.999071	no	GCN5_ORYSJ Histone acetyltransferase GCN5 n=4 (Poaceae) Exp=0; maizesequence.org: Uniprot/SPTREMBL:Q8VWI2; GCN5 proteinHistone acetyl transferaseHistone acetyltransferasePutative uncharacterized protein ;;; | UniGene:Zm.3085; Histone acetyl transferase GNAT/MYST 101 | RefSeq_peptide:NP_001105145; histone acetyl transferase GNAT/MYST 101 | RefSeq_dna:NM_001111675; histone acetyl transferase GNAT/M…
GRMZM2G004957	10:84240838-84246083	1.45926	1.15106	-0.342274		-0.687735	0.2375	0.862796	no	Q8W0T5_SORBI Putative uncharacterized protein Sb07g002780 n=1 (Sorghum bicolor) Exp=0; maizesequence.org: GO:0043565; sequence-specific DNA binding | GO:0030528; transcription regulator activity | GO:0006355; regulation of transcription DNA-dependent | GO:0005634; nucleus | GO:0003840; gamma-glutamyltransferase activity | GO:0003700; transcription factor activity
GRMZM2G076272	9:58196207-58199144	0.00557419	0.00434147	-0.360579		0	1	1	no	B6U143_MAIZE BEL1-related homeotic protein 13 n=3 (Zea mays) Exp=0; maizesequence.org: Uniprot/SPTREMBL:C4IYV8; Putative uncharacterized protein | Uniprot/SPTREMBL:B6U143; BEL1-related homeotic protein 13 | GO:0043565; sequence-specific DNA binding | GO:0030528; transcription regulator activity | GO:0006355; regulation of transcription DNA-dependent | GO:0005634; nucleus | GO:0003700; transcripti…
GRMZM2G432801	6:160430034-160440597	8.32431	9.46794	0.18572		0.440195	0.4396	0.992864	no	Q8L5G8_MAIZE Hexokinase n=4 (Andropogoneae) Exp=0; maizesequence.org: Uniprot/SPTREMBL:B6U4K6; Hexokinase-2 | Uniprot/SPTREMBL:B3GQB5; Hexokinase | UniGene:Zm.5206; Hexokinase | UniGene:Zm.157565; Hypothetical protein LOC100384667 | RefSeq_peptide:NP_001123599; hexokinase | RefSeq_dna:NM_001130127; hexokinase (LOC100170246) mRNA | GO:0016773; phosphotransferase activity alcohol group as acceptor …
GRMZM2G058745	8:124182496-124187982	20.0447	21.9367	0.130126		0.399547	0.48605	0.999071	no	Q8L5G8_MAIZE Hexokinase n=4 (Andropogoneae) Exp=0; maizesequence.org: RefSeq_dna:NM_001112059; LOC542510 (pco074668) mRNA | RefSeq_peptide:NP_001105529; LOC542510 | UniGene:Zm.95342; LOC542510 | Uniprot/SPTREMBL:C0PIU9; Putative uncharacterized protein | Uniprot/SPTREMBL:Q8L5G8; Hexokinase (EC 2.7.1.1) | GO:0016773; phosphotransferase activity alcohol group as acceptor | GO:0006096; glycolysis | …
GRMZM2G171373	3:201861548-201871591	6.66428	6.48673	-0.0389576		-0.100199	0.8609	0.999071	no	B7ZYX4_MAIZE Putative uncharacterized protein n=2 (Zea mays) Exp=0; maizesequence.org: Uniprot/SPTREMBL:C0P8K7; Putative uncharacterized protein | Uniprot/SPTREMBL:B7ZYX4; Putative uncharacterized protein | UniGene:Zm.34312; Hypothetical protein LOC100279587 | RefSeq_peptide:NP_001146056; hypothetical protein LOC100279587 | RefSeq_dna:NM_001152584; hypothetical protein LOC100279587 (LOC100279587)…
GRMZM2G339379	8:162996602-163003404	0.325807	0.311856	-0.0631376		-0.0991323	0.8621	0.999071	no	C5XFI3_SORBI Putative uncharacterized protein Sb03g043210 n=1 (Sorghum bicolor) Exp=0; maizesequence.org: UniGene:Zm.133468; Clone 394823 mRNA sequence
GRMZM2G171163	4:172386709-172389864	0.00562867	0.0155865	1.46943		0	1	1	no	C5XV72_SORBI Putative uncharacterized protein Sb04g036630 n=1 (Sorghum bicolor) Exp=6e-132
GRMZM2G027075	4:172459735-172468782	10.2591	10.3651	0.0148299		0.0382277	0.94565	0.999071	no	No significant hits (1e-5)
GRMZM2G107109	4:172286684-172295419	0.814024	0.609247	-0.418044		-0.759661	0.1722	0.776152	no	No significant hits (1e-5); maizesequence.org: UniGene:Zm.123799; Clone 1686762 mRNA sequence
GRMZM2G140524	4:172338860-172347926	0.463646	0.426892	-0.119153		-0.192458	0.72305	0.999071	no	C5XV72_SORBI Putative uncharacterized protein Sb04g036630 n=1 (Sorghum bicolor) Exp=2e-109; maizesequence.org: UniGene:Zm.123799; Clone 1686762 mRNA sequence
GRMZM2G036297	2:4265162-4268840	1.10378	0.70024	-0.656531		-1.02778	0.0764	0.552425	no	LG1_MAIZE Protein LIGULELESS 1 n=2 (Zea mays) Exp=1e-174; maizesequence.org: Uniprot/SWISSPROT:O04003; Protein LIGULELESS 1 | Uniprot/SPTREMBL:Q547S5; LIGULELESS1 | UniGene:Zm.328; Liguleless1 | RefSeq_peptide:NP_001105543; protein LIGULELESS 1 | RefSeq_dna:NM_001112073; liguleless1 (lg1) mRNA | MaizeGDB_GenBank:ZMU89496; product:liguleless1 protein | GO:0005634; nucleus | GO:0003677; DNA binding…
AC233912.1_FG001	7:19993627-19995763	0.0310126	0.0490257	0.660684		0	1	1	no	B6TW19_MAIZE MADS-box transcription factor 31 n=3 (Andropogoneae) Exp=2e-67; maizesequence.org: GO:0043565; sequence-specific DNA binding | GO:0006355; regulation of transcription DNA-dependent | GO:0005634; nucleus | GO:0003700; transcription factor activity
GRMZM2G005155	2:10371799-10379775	28.9476	28.1627	-0.0396581		-0.107466	0.8509	0.999071	no	B6TW19_MAIZE MADS-box transcription factor 31 n=3 (Andropogoneae) Exp=9e-136; maizesequence.org: Uniprot/SPTREMBL:B6TW19; MADS-box transcription factor 31 | Uniprot/SPTREMBL:B4FN44; Putative uncharacterized protein | RefSeq_peptide:NP_001140301; hypothetical protein LOC100272346 | GO:0043565; sequence-specific DNA binding | GO:0006355; regulation of transcription DNA-dependent | GO:0005634; nucle…
GRMZM2G028054	8:170725026-170728884	8.09305	8.26079	0.0295962		0.0762194	0.89145	0.999071	no	B4FN81_MAIZE Putative uncharacterized protein n=2 (Zea mays) Exp=0; maizesequence.org: Uniprot/SPTREMBL:C0PLQ7; Putative uncharacterized protein | Uniprot/SPTREMBL:B6U7Q6; Transcription factor GAMYB | Uniprot/SPTREMBL:B4FN81; Putative uncharacterized protein | RefSeq_peptide:NP_001152014; transcription factor GAMYB | RefSeq_dna:NM_001158542; transcription factor GAMYB (LOC100285651) mRNA | GO:000…
GRMZM2G135052	9:27184754-27191507	14.1249	11.9141	-0.245571		-0.644283	0.25945	0.883	no	C5Z255_SORBI Putative uncharacterized protein Sb10g000590 n=1 (Sorghum bicolor) Exp=2e-116; maizesequence.org: GO:0003677; DNA binding | UniGene:Zm.126417; Transcribed locus moderately similar to XP_002437676.1 hypothetical protein SORBIDRAFT_10g000590 [Sorghum bicolor]
GRMZM2G123140	1:100912575-100918541	0.100597	0.0977556	-0.041336		0	1	1	no	Q9LEE7_MAIZE OCL4 protein n=4 (Andropogoneae) Exp=0; maizesequence.org: Uniprot/SPTREMBL:Q9LEE7; OCL4 protein | Uniprot/SPTREMBL:B3GW90; Putative HD-ZIP IV family transcription factor OCL4 | Uniprot/SPTREMBL:B3GW89; Putative HD-ZIP IV family transcription factor OCL4 | RefSeq_peptide:NP_001105126; OCL4 protein | RefSeq_dna:NM_001111656; OCL4 protein (ocl4) mRNA | GO:0043565; sequence-specific DNA…
GRMZM2G124532	1:50022840-50034597	29.2253	26.9107	-0.119038		-0.349908	0.53595	0.999071	no	Q1A5Y4_MAIZE Phytochrome B1 (Fragment) n=1 (Zea mays) Exp=0; maizesequence.org: Uniprot/SPTREMBL:C0PIF4; Putative uncharacterized protein | GO:0016772; transferase activity transferring phosphorus-containing groups | GO:0016310; phosphorylation | GO:0005524; ATP binding
GRMZM2G092174	9:135245566-135251882	5.8854	4.2267	-0.477609		-1.29731	0.02605	0.311904	no	PHYB_SORBI Phytochrome B n=14 (Poaceae) Exp=0; maizesequence.org: Uniprot/SPTREMBL:A0SE15; Phytochrome B2 Fragment | Uniprot/SPTREMBL:A0SE12; Phytochrome B2 Fragment | Uniprot/SPTREMBL:A0SE11; Phytochrome B2 Fragment | Uniprot/SPTREMBL:A0SE10; Phytochrome B2 Fragment | UniGene:Zm.99208; Hypothetical protein LOC100381811 | RefSeq_peptide:NP_001168077; hypothetical protein LOC100381811 | Uniprot/SP…
GRMZM2G700665	8:131576830-131580537	0.777906	0.802197	0.0443607		0.0721526	0.9005	0.999071	no	A6NAX7_MAIZE AP2 domain transcription factor n=2 (Zea mays) Exp=9e-124; maizesequence.org: UniGene:Zm.7856; TSA: Zea mays contig43921 mRNA sequence | GO:0016021; integral to membrane | GO:0015385; sodium:hydrogen antiporter activity | GO:0006885; regulation of pH | GO:0006814; sodium ion transport | GO:0006355; regulation of transcription DNA-dependent | GO:0003700; transcription factor activity …
GRMZM2G156756	1:295502078-295509029	37.2186	39.7332	0.0943212		0.284231	0.6199	0.999071	no	C5WU18_SORBI Putative uncharacterized protein Sb01g002530 n=1 (Sorghum bicolor) Exp=0; maizesequence.org: Uniprot/SPTREMBL:B4FP14; Putative uncharacterized protein | UniGene:Zm.82333; Hypothetical protein LOC100272505 | RefSeq_peptide:NP_001140446; hypothetical protein LOC100272505 | RefSeq_dna:NM_001146974; hypothetical protein LOC100272505 (LOC100272505) mRNA | MaizeGDB_GenBank:AY106181; | GO:0…
GRMZM2G065451	4:238310810-238321628	5.11938	5.38073	0.0718328		0.0706168	0.90305	0.999071	no	C0P9E9_MAIZE Putative uncharacterized protein n=2 (Zea mays) Exp=0; maizesequence.org: Uniprot/SPTREMBL:C0P9E9; Putative uncharacterized protein | Uniprot/SPTREMBL:C0P8B7; Putative uncharacterized protein | UniGene:Zm.35572; Hypothetical protein LOC100382490 | UniGene:Zm.143024; Hypothetical protein LOC100382631 | RefSeq_peptide:NP_001168826; hypothetical protein LOC100382631 | RefSeq_peptide:NP_…
GRMZM2G097275	5:77973104-77978271	5.00183	4.05762	-0.301822		-0.764285	0.186	0.801235	no	B4FQY3_MAIZE Putative uncharacterized protein n=1 (Zea mays) Exp=0; maizesequence.org: Uniprot/SPTREMBL:B4FQY3; Putative uncharacterized protein | RefSeq_peptide:NP_001145727; hypothetical protein LOC100279234 | GO:0005634; nucleus | GO:0003677; DNA binding | EntrezGene:100279234; hypothetical protein LOC100279234
GRMZM2G067624	7:151254397-151256086	5.52507	4.59345	-0.266415		-0.582975	0.30815	0.924633	no	B6TMJ5_MAIZE SBP domain containing protein n=1 (Zea mays) Exp=2e-24; maizesequence.org: GO:0006412; translation | GO:0006566; threonine metabolic process | GO:0042309; homoiothermy | GO:0050825; ice binding | GO:0050826; response to freezing | GO:0005840; ribosome | GO:0005634; nucleus | GO:0005622; intracellular | GO:0005524; ATP binding | GO:0004413; homoserine kinase activity | GO:0003735; str…
GRMZM2G106798	4:17511895-17523810	2.66443	2.79175	0.0673428		0.130297	0.82105	0.999071	no	B6UE84_MAIZE Putative uncharacterized protein n=2 (Zea mays) Exp=4e-41; maizesequence.org: Uniprot/SPTREMBL:C0P8S5; Putative uncharacterized protein | Uniprot/SPTREMBL:B6UE84; Putative uncharacterized protein | UniGene:Zm.24793; Hypothetical protein LOC100278824 | RefSeq_peptide:NP_001145445; hypothetical protein LOC100278824 | RefSeq_dna:NM_001151973; hypothetical protein LOC100278824 (LOC100278…
GRMZM2G160917	1:188215375-188219483	0.00910216	0.0201132	1.14386		0	1	1	no	Q9SM15_MAIZE SBP-domain protein 5 (Fragment) n=1 (Zea mays) Exp=1e-93; maizesequence.org: GO:0005634; nucleus | GO:0003677; DNA binding
GRMZM2G021044	2:21907391-21910615	8.85936	8.85376	-0.000912216		-0.00271347	0.99615	0.999184	no	Q8L820_MAIZE SET domain-containing protein SET104 n=1 (Zea mays) Exp=0; maizesequence.org: RefSeq_peptide:NP_001105193; SET domain-containing protein SET104 | UniGene:Zm.5647; Transcribed locus strongly similar to NP_001105193.1 SET domain-containing protein SET104 [Zea mays] | Uniprot/SPTREMBL:Q8L820; SET domain-containing protein SET104 | GO:0018024; histone-lysine N-methyltransferase activity …
GRMZM2G093895	10:10294381-10296488	4.73592	3.68967	-0.360153		-0.83645	0.1371	0.713385	no	C4IYP4_MAIZE Putative uncharacterized protein n=1 (Zea mays) Exp=1e-121; maizesequence.org: Uniprot/SPTREMBL:C4IYP4; Putative uncharacterized protein | UniGene:Zm.85085; Hypothetical protein LOC100384575 | UniGene:Zm.151215; TSA: Zea mays contig08592 mRNA sequence | UniGene:Zm.128971; Hypothetical protein LOC100193684 | RefSeq_peptide:NP_001170554; hypothetical protein LOC100384575 | RefSeq_dna:N…
GRMZM2G465091	10:132055802-132056847	0.471145	0.792605	0.750431		0.860327	0.1132	0.658683	no	C5YCH8_SORBI Putative uncharacterized protein Sb06g023130 n=1 (Sorghum bicolor) Exp=1e-46
GRMZM2G034638	8:160527350-160529186	1.97811	1.92911	-0.0361872		-0.041426	0.94085	0.999071	no	B6SIN5_MAIZE TCP-domain protein n=6 (Andropogoneae) Exp=2e-84; maizesequence.org: Uniprot/SPTREMBL:B6U4J3; TCP-domain protein | Uniprot/SPTREMBL:B4G202; Putative uncharacterized protein | UniGene:Zm.125548; Hypothetical protein LOC100274570 | UniGene:Zm.119428; TCP-domain protein | RefSeq_peptide:NP_001151775; TCP-domain protein | RefSeq_peptide:NP_001142396; hypothetical protein LOC100274570 | R…
GRMZM2G077755	5:207185178-207187500	0.685077	0.545537	-0.328589		-0.506739	0.38145	0.969038	no	Q6YUX6_ORYSJ Os02g0747400 protein n=2 (Oryza sativa subsp. japonica) Exp=1e-85; maizesequence.org: UniGene:Zm.145645; TSA: Zea mays contig45701 mRNA sequence | UniGene:Zm.139604; TSA: Zea mays contig49910 mRNA sequence
GRMZM2G089638	3:140859691-140861716	0.66404	0.76278	0.199997		0.304527	0.5833	0.999071	no	C4IYP4_MAIZE Putative uncharacterized protein n=1 (Zea mays) Exp=3e-99; maizesequence.org: UniGene:Zm.154943; TSA: Zea mays contig31539 mRNA sequence | GO:0016021; integral to membrane | GO:0007186; G-protein coupled receptor protein signaling pathway | GO:0004966; galanin receptor activity
GRMZM2G096610	10:100088722-100089636	3.66885	3.15751	-0.216541		-0.373056	0.51155	0.999071	no	C5YCQ5_SORBI Putative uncharacterized protein Sb06g002260 n=1 (Sorghum bicolor) Exp=1e-44; maizesequence.org: UniGene:Zm.50462; TSA: Zea mays contig00646 mRNA sequence | UniGene:Zm.90179; Transcribed locus moderately similar to XP_002446141.1 hypothetical protein SORBIDRAFT_06g002260 [Sorghum bicolor]
GRMZM2G092214	3:158493311-158495256	23.5337	23.0917	-0.0273538		-0.0832513	0.88575	0.999071	no	B6SIN5_MAIZE TCP-domain protein n=6 (Andropogoneae) Exp=8e-87; maizesequence.org: Uniprot/SPTREMBL:B6U2U5; TCP-domain protein | Uniprot/SPTREMBL:B6SIN5; TCP-domain protein | Uniprot/SPTREMBL:B4FNI4; Putative uncharacterized protein | UniGene:Zm.5522; Hypothetical protein LOC100272415 | RefSeq_peptide:NP_001140365; hypothetical protein LOC100272415 | RefSeq_dna:NM_001146893; hypothetical protein L…
GRMZM2G113888	9:5004013-5006205	6.74516	8.01123	0.248171		0.65627	0.25325	0.876758	no	B4FQS4_MAIZE Putative uncharacterized protein n=1 (Zea mays) Exp=4e-103; maizesequence.org: Uniprot/SPTREMBL:B4FQS4; Putative uncharacterized protein | UniGene:Zm.99875; Clone 1597176 mRNA sequence | UniGene:Zm.83452; Hypothetical protein LOC100272799 | RefSeq_peptide:NP_001140724; hypothetical protein LOC100272799 | RefSeq_dna:NM_001147252; hypothetical protein LOC100272799 (LOC100272799) mRNA |…
GRMZM2G307588	7:133202775-133206423	0.0445307	0.0628123	0.496247		0	1	1	no	B6U6Y0_MAIZE Squamosa promoter-binding-like protein 9 n=2 (Zea mays) Exp=2e-167; maizesequence.org: Uniprot/SPTREMBL:B6U6Y0; Squamosa promoter-binding-like protein 9 | Uniprot/SPTREMBL:B4FXD9; Putative uncharacterized protein | UniGene:Zm.240; SBP-domain protein 6 | MaizeGDB_GenBank:AJ011619; product:SBP-domain protein 6 | GO:0005634; nucleus | GO:0003677; DNA binding
GRMZM2G052890	6:132008586-132016861	0.0488583	0.0606771	0.312548		0	1	1	no	Q41876_MAIZE ZAG1 protein n=1 (Zea mays) Exp=5e-151; maizesequence.org: RefSeq_dna:NM_001111851; homologue of Arabidopsis gene AGAMOUS (ZAG1) mRNA | RefSeq_peptide:NP_001105321; homologue of Arabidopsis gene AGAMOUS | UniGene:Zm.133; Homologue of Arabidopsis gene AGAMOUS | Uniprot/SPTREMBL:B4FKN5; Putative uncharacterized protein | Uniprot/SPTREMBL:Q41876; ZAG1 protein | MaizeGDB_GenBank:MZEZAG1A…
GRMZM2G108016	5:150036612-150037929	0.0641409	0.25	1.96261		0	1	1	no	A9LLY7_MAIZE ZCN13 n=2 (Andropogoneae) Exp=9e-106; maizesequence.org: Uniprot/SPTREMBL:A9LLY7; ZCN13
GRMZM2G127121	5:181990430-181993244	0.978758	0.596595	-0.7142		-0.963788	0.09235	0.598209	no	A8WES7_MAIZE ZCN16 n=2 (Andropogoneae) Exp=3e-99; maizesequence.org: Uniprot/SPTREMBL:A8WES7; ZCN16 | UniGene:Zm.103286; ZCN16 protein | RefSeq_peptide:NP_001106253; ZCN16 protein | RefSeq_dna:NM_001112782; ZCN16 protein (ZCN16) mRNA | GenBank:EU241931; product:ZCN16 | EntrezGene:100127525; ZCN16 protein
AC214791.2_FG002	10:36388692-36389588	0.25	0.0187307	-3.73845		0	1	1	no	A9LLZ4_MAIZE ZCN20 n=3 (Andropogoneae) Exp=3e-48; maizesequence.org: Uniprot/SPTREMBL:A9LLZ4; ZCN20 | Uniprot/SPTREMBL:A8WET1; ZCN20 Fragment | UniGene:Zm.103284; ZCN20 protein
GRMZM2G440005	7:138923901-138933252	0.102094	0.308254	1.59422		1.17404	0.2313	0.855801	no	A8WES9_MAIZE ZCN18 n=3 (Andropogoneae) Exp=5e-94; maizesequence.org: Uniprot/SPTREMBL:A9LLZ6; ZCN24
AC217051.3_FG006	10:114050160-114051244	0.25	0.019026	-3.71588		0	1	1	no	A8WER6_MAIZE ZCN4 n=5 (Andropogoneae) Exp=1e-91; maizesequence.org: Uniprot/SPTREMBL:A9LLX9; ZCN5 | Uniprot/SPTREMBL:A8WER7; ZCN5 | UniGene:Zm.98503; ZCN5 protein | RefSeq_peptide:NP_001106244; ZCN5 protein | RefSeq_dna:NM_001112773; ZCN5 protein (ZCN5) mRNA | GenBank:EU241921; product:ZCN5 | EntrezGene:100127516; ZCN5 protein
GRMZM2G132880	4:188561913-188563106	0.309766	0.869904	1.48968		1.79493	0.00375	0.0880553	no	A8WER8_MAIZE ZCN6 n=2 (Zea mays) Exp=5e-98; maizesequence.org: Uniprot/SPTREMBL:A9LLY0; RCN1-Corn Centroradialis/TFL1-like proteinZCN6 ; | Uniprot/SPTREMBL:A8WER8; ZCN6 | UniGene:Zm.103290; ZCN6 protein | RefSeq_peptide:NP_001106245; ZCN6 protein | RefSeq_dna:NM_001112774; ZCN6 protein (ZCN6) mRNA | GenBank:EU241922; product:ZCN6 | EntrezGene:100127517; ZCN6 protein
GRMZM2G179264	8:123029155-123042569	7.891	6.0566	-0.3817		-0.380304	0.4536	0.997434	no	A8WER9_MAIZE ZCN7 n=3 (Zea mays) Exp=2e-82; maizesequence.org: Uniprot/SPTREMBL:A9LLY2; ZCN8 | Uniprot/SPTREMBL:A8WES0; ZCN8 | UniGene:Zm.103288; ZCN8 protein | RefSeq_peptide:NP_001106247; ZCN8 protein | RefSeq_dna:NM_001112776; ZCN8 protein (ZCN8) mRNA | GenBank:EU241924; product:ZCN8 | EntrezGene:100127519; ZCN8 protein
GRMZM2G180190	2:12649205-12652213	0.0214975	0.0047722	-2.17144		0	1	1	no	Q5Q1I9_ZEAMP Floricaula/leafy-like 2 n=24 (Zea mays) Exp=2e-136; maizesequence.org: Uniprot/SPTREMBL:Q5Q1K0; Floricaula/leafy-like 2 | Uniprot/SPTREMBL:Q5Q1K1; Floricaula/leafy-like 2 | Uniprot/SPTREMBL:Q5Q1K3; Floricaula/leafy-like 2 | Uniprot/SPTREMBL:Q5Q1K4; Floricaula/leafy-like 2 | Uniprot/SPTREMBL:Q5Q1K5; Floricaula/leafy-like 2 | Uniprot/SPTREMBL:Q5Q1K7; Floricaula/leafy-like 2 | Uniprot/S…
GRMZM2G014902	4:32527447-32560791	1059.01	1082.75	0.031984		0.0351789	0.95065	0.999071	no	No significant hits (1e-5); maizesequence.org: Uniprot/SPTREMBL:C0HDV4; Putative uncharacterized protein | Uniprot/SPTREMBL:B6SS29; LHY protein | UniGene:Zm.94309; LHY protein | RefSeq_peptide:NP_001147482; LHY protein | RefSeq_dna:NM_001154010; LHY protein (LOC100281091) mRNA | GO:0003677; DNA binding | EntrezGene:100281091; LHY protein
GRMZM2G152862	8:102450747-102454585	0.0653453	0.02188	-1.57847		0	1	1	no	B6TDB4_MAIZE MADS-box transcription factor 4 n=6 (Andropogoneae) Exp=5e-120; maizesequence.org: Uniprot/SPTREMBL:Q9AR49; Putative MADS-domain transcription factor | Uniprot/SPTREMBL:B7ZY85; Putative uncharacterized protein | Uniprot/SPTREMBL:B6TDB4; MADS-box transcription factor 4 | RefSeq_peptide:NP_001105137; Zea mays MADS29. | RefSeq_dna:NM_001111667; Zea mays MADS29 (zmm29) mRNA | MaizeGDB_Ge…
GRMZM2G032339	1:277205920-277298925	280.726	309.346	0.140059		0.339558	0.5529	0.999071	no	B4XAV4_MAIZE ZMM15 MADS-box protein n=4 (Andropogoneae) Exp=6e-27; maizesequence.org: GO:0006355; regulation of transcription DNA-dependent | GO:0005634; nucleus | GO:0003700; transcription factor activity
GRMZM2G171365	9:154082656-154102685	2.20051	2.14365	-0.0377686		-0.0704974	0.90425	0.999071	no	Q9FR85_MAIZE Putative uncharacterized protein n=1 (Zea mays) Exp=4e-128; maizesequence.org: Uniprot/SPTREMBL:Q9FR85; M5 proteinMADS box protein 1Putative uncharacterized protein ;; | RefSeq_peptide:NP_001105152; MADS1 | MaizeGDB_GenBank:AF112148; product:MADS box protein 1 | GO:0043565; sequence-specific DNA binding | GO:0006355; regulation of transcription DNA-dependent | GO:0005634; nucleus | G…
GRMZM2G159397	1:194046501-194054589	0.00630637	0.25	5.30897		0	1	1	no	B6T6U6_MAIZE SRF-type transcription factor family protein n=3 (Andropogoneae) Exp=6e-136; maizesequence.org: UniGene:Zm.156720; Zea mays MADS7 | Uniprot/SPTREMBL:B6T6U6; SRF-type transcription factor family protein | Uniprot/SPTREMBL:D3YBA3; MADS-domain transcription factor | Uniprot/SPTREMBL:Q84V70; Putative MADS-domain transcription factorPutative uncharacterized proteinSRF-type transcription f…
GRMZM2G005732	7:174996468-175031029	1.86028	2.57784	0.470643		0.95995	0.093	0.600182	no	PRR37_ORYSJ Two-component response regulator-like PRR37 n=2 (Oryza sativa) Exp=3e-79; maizesequence.org: UniGene:Zm.137838; Transcribed locus weakly similar to NP_001060743.1 Os07g0695100 [Oryza sativa Japonica Group]
GRMZM2G005732	7:174996468-175031029	1.86028	2.57784	0.470643		0.95995	0.093	0.600182	no	PRR37_ORYSJ Two-component response regulator-like PRR37 n=2 (Oryza sativa) Exp=3e-79; maizesequence.org: UniGene:Zm.137838; Transcribed locus weakly similar to NP_001060743.1 Os07g0695100 [Oryza sativa Japonica Group]
GRMZM2G095727	9:138861845-138882844	72.7491	90.3151	0.312038		0.673399	0.2251	0.851147	no	B6SHA1_MAIZE Two-component response regulator-like PRR73 n=3 (Andropogoneae) Exp=0
GRMZM2G057466	1:103624541-103630892	2.09427	2.38319	0.186447		0.438461	0.44455	0.994414	no	C5WQP2_SORBI Putative uncharacterized protein Sb01g027940 n=1 (Sorghum bicolor) Exp=0; maizesequence.org: UniGene:Zm.80663; Transcribed locus strongly similar to NP_001174899.1 Os06g0612150 [Oryza sativa Japonica Group]
GRMZM2G329159	1:10691401-10695297	1.32342	1.74639	0.400105		0.765004	0.18815	0.803705	no	C5WXX2_SORBI Putative uncharacterized protein Sb01g047010 n=1 (Sorghum bicolor) Exp=0; maizesequence.org: GO:0005622; intracellular | GO:0008270; zinc ion binding | UniGene:Zm.39556; Transcribed locus strongly similar to XP_002465852.1 hypothetical protein SORBIDRAFT_01g047010 [Sorghum bicolor]
GRMZM2G004641	1:13640025-13643872	51.8244	41.9628	-0.304521		-0.893123	0.1181	0.669559	no	C5WWV8_SORBI Putative uncharacterized protein Sb01g046170 n=1 (Sorghum bicolor) Exp=0; maizesequence.org: Uniprot/SPTREMBL:C4J2M2; Putative uncharacterized protein | Uniprot/SPTREMBL:C0P3S4; Putative uncharacterized protein | Uniprot/SPTREMBL:B8A3A4; Putative uncharacterized protein | UniGene:Zm.39503; Hypothetical protein LOC100382029 | RefSeq_peptide:NP_001168265; hypothetical protein LOC100382…
GRMZM2G321750	1:153114580-153117656	3.55862	3.38679	-0.0713994		-0.133482	0.81495	0.999071	no	Q6L655_9ASPA Actin (Fragment) n=1 (Gladiolus hybrid cultivar Traveler) Exp=8e-60; maizesequence.org: GO:0005524; ATP binding | GO:0005515; protein binding
GRMZM2G123900	1:154329457-154331722	4.20227	4.63299	0.140775		0.315634	0.57875	0.999071	no	C5YPZ2_SORBI Putative uncharacterized protein Sb08g018760 n=2 (Andropogoneae) Exp=6e-77; maizesequence.org: Uniprot/SPTREMBL:B4FYD9; Putative uncharacterized protein | UniGene:Zm.21747; Hypothetical protein LOC100273972 | RefSeq_peptide:NP_001141831; hypothetical protein LOC100273972 | RefSeq_dna:NM_001148359; hypothetical protein LOC100273972 (LOC100273972) mRNA | GO:0045449; regulation of trans…
GRMZM2G000686	1:15805372-15808648	16.5327	13.9658	-0.243424		-0.661039	0.25545	0.878745	no	B6TQI5_MAIZE Nuclear transcription factor Y subunit A-3 n=3 (Andropogoneae) Exp=6e-104; maizesequence.org: UniGene:Zm.126202; Transcribed locus | GO:0016602; CCAAT-binding factor complex | GO:0006355; regulation of transcription DNA-dependent | GO:0005634; nucleus | GO:0003700; transcription factor activity | GO:0003677; DNA binding
GRMZM2G069454	1:167246975-167251628	0.0402614	0.0138081	-1.54388		0	1	1	no	C5Z082_SORBI Putative uncharacterized protein Sb09g024030 n=1 (Sorghum bicolor) Exp=8e-19
GRMZM2G130095	1:167883377-167889702	63.9849	60.2826	-0.0859898		-0.255104	0.6602	0.999071	no	B6T5L0_MAIZE KH domain containing protein n=2 (Zea mays) Exp=0; maizesequence.org: Uniprot/SPTREMBL:C0P3W2; Putative uncharacterized protein | Uniprot/SPTREMBL:B6T8T7; Putative uncharacterized protein | Uniprot/SPTREMBL:B6T5L0; KH domain containing protein | UniGene:Zm.4640; KH domain containing protein | UniGene:Zm.108958; Transcribed locus | UniGene:Zm.102615; Transcribed locus | RefSeq_peptide…
GRMZM2G018472	1:168430588-168435266	0.25	0.00656277	-5.25148		0	1	1	no	C5YRB0_SORBI Putative uncharacterized protein Sb08g020290 n=1 (Sorghum bicolor) Exp=1e-82; maizesequence.org: GO:0045449; regulation of transcription | GO:0030528; transcription regulator activity | GO:0005634; nucleus
GRMZM2G003509	1:173245311-173257862	5.99206	5.60085	-0.0974063		-0.249536	0.6654	0.999071	no	C5YRY3_SORBI Putative uncharacterized protein Sb08g021350 n=3 (Andropogoneae) Exp=0; maizesequence.org: Uniprot/SPTREMBL:B7ZZY1; Putative uncharacterized protein | Uniprot/SPTREMBL:B6SSK2; Putative uncharacterized protein | UniGene:Zm.25007; Transcribed locus | UniGene:Zm.125800; Hypothetical protein LOC100279785 | RefSeq_peptide:NP_001146215; hypothetical protein LOC100279785 | RefSeq_dna:NM_001…
GRMZM2G361842	1:173335600-173340698	21.7026	22.2711	0.0373049		0.10753	0.8495	0.999071	no	B6TY54_MAIZE Nuclear transcription factor Y subunit A-7 n=3 (Andropogoneae) Exp=4e-71; maizesequence.org: RefSeq_dna:NM_001157752; LOC100284857 (cl982_-1b) mRNA | RefSeq_peptide:NP_001151224; LOC100284857 | UniGene:Zm.27291; LOC100284857 | Uniprot/SPTREMBL:B6TY54; Nuclear transcription factor Y subunit A-7 | GO:0016602; CCAAT-binding factor complex | GO:0006355; regulation of transcription DNA-de…
GRMZM2G099319	1:179614335-179618197	102.014	84.2655	-0.275753		-0.784047	0.1732	0.77789	no	B4FBI0_MAIZE Putative uncharacterized protein n=1 (Zea mays) Exp=0; maizesequence.org: Uniprot/SPTREMBL:B4FBI0; Putative uncharacterized protein | UniGene:Zm.25481; Hypothetical protein LOC100192481 | RefSeq_peptide:NP_001131173; hypothetical protein LOC100192481 | RefSeq_dna:NM_001137701; hypothetical protein LOC100192481 (LOC100192481) mRNA | GO:0043565; sequence-specific DNA binding | GO:00305…
GRMZM2G059102	1:17964694-17986258	0.330317	0.818732	1.30954		1.70574	0.0033	0.0797797	no	Q84V77_MAIZE Putative MADS-domain transcription factor (Fragment) n=1 (Zea mays) Exp=4e-26; maizesequence.org: Uniprot/SPTREMBL:Q84V77; Putative MADS-domain transcription factor Fragment | Uniprot/SPTREMBL:B4FG10; MADS-box transcription factor 47Putative uncharacterized protein ; | UniGene:Zm.5854; LOC542034 | GO:0043565; sequence-specific DNA binding | GO:0006355; regulation of transcription DNA…
GRMZM2G113127	1:183805912-183807419	23.2985	22.8506	-0.028005		-0.0783873	0.8921	0.999071	no	B6UA50_MAIZE Nuclear transcription factor Y subunit C-2 n=2 (Andropogoneae) Exp=2e-64; maizesequence.org: Uniprot/SPTREMBL:B6UA50; Nuclear transcription factor Y subunit C-2 | UniGene:Zm.6676; LOC100285814 | RefSeq_peptide:NP_001152176; LOC100285814 | RefSeq_dna:NM_001158704; LOC100285814 (pco147903a) mRNA | GO:0043565; sequence-specific DNA binding | GO:0015629; actin cytoskeleton | GO:0007155; …
GRMZM2G169270	1:189617160-189623411	38.8419	40.7225	0.0682124		0.199757	0.73085	0.999071	no	C5YIN8_SORBI Putative uncharacterized protein Sb07g027420 n=1 (Sorghum bicolor) Exp=0; maizesequence.org: UniGene:Zm.139912; TSA: Zea mays contig55405 mRNA sequence | UniGene:Zm.138716; TSA: Zea mays contig55885 mRNA sequence | UniGene:Zm.136954; TSA: Zea mays contig43086 mRNA sequence | GO:0016021; integral to membrane | GO:0006813; potassium ion transport | GO:0005634; nucleus | GO:0005249; vol…
AC213524.3_FG003	1:193546928-193548421	0.25	0.010461	-4.57884		0	1	1	no	B6SIN5_MAIZE TCP-domain protein n=6 (Andropogoneae) Exp=2e-28
GRMZM2G060265	1:1953454-1955531	1.05196	1.50463	0.516329		0.50632	0.37465	0.965072	no	B8BI59_ORYSI Putative uncharacterized protein n=1 (Oryza sativa subsp. indica) Exp=4e-135; maizesequence.org: UniGene:Zm.37509; Clone 282885 mRNA sequence
GRMZM2G053027	1:196236197-196247302	28.4689	25.522	-0.157645		-0.481908	0.3919	0.973926	no	B6TEE7_MAIZE VIP2 protein n=3 (Andropogoneae) Exp=0; maizesequence.org: Uniprot/SPTREMBL:B6TEE7; VIP2 protein | Uniprot/SPTREMBL:B4FIF1; Putative uncharacterized protein | UniGene:Zm.84547; Hypothetical protein LOC100194362 | UniGene:Zm.143211; TSA: Zea mays contig64322 mRNA sequence | RefSeq_peptide:NP_001132869; hypothetical protein LOC100194362 | RefSeq_dna:NM_001139397; hypothetical protein L…
GRMZM2G153823	1:196277683-196281261	18.0603	14.1451	-0.352519		-0.992824	0.0852	0.576053	no	14333_ORYSJ 14-3-3-like protein GF14-C n=12 (Poaceae) Exp=3e-127; maizesequence.org: UniGene:Zm.4115; Hypothetical LOC542194 | RefSeq_peptide:NP_001105278; hypothetical protein LOC542194 | RefSeq_dna:NM_001111808; hypothetical LOC542194 (LOC542194) mRNA | GO:0019904; protein domain specific binding | GenBank:AY744160; product:putative 14-3-3 protein | EntrezGene:542194; hypothetical LOC542194 | U…
GRMZM2G107031	1:197227444-197228576	12.3927	12.9557	0.0640964		0.157064	0.7799	0.999071	no	PCF2_ORYSJ Transcription factor PCF2 n=3 (Oryza sativa) Exp=3e-60; maizesequence.org: UniGene:Zm.20665; Clone 288123 mRNA sequence
GRMZM2G175856	1:197306493-197307177	0.25	0.0346747	-2.84997		0	1	1	no	B6SZR2_MAIZE Dehydration-responsive element-binding protein 1B n=1 (Zea mays) Exp=9e-75; maizesequence.org: Uniprot/SPTREMBL:B6SZR2; Dehydration-responsive element-binding protein 1B | RefSeq_peptide:NP_001148263; dehydration-responsive element-binding protein 1B | GO:0006355; regulation of transcription DNA-dependent | GO:0003700; transcription factor activity | GO:0003677; DNA binding | EntrezG…
GRMZM2G055018	1:19772455-19776436	0.0175075	0.0284053	0.698187		0	1	1	no	C5Z568_SORBI Putative uncharacterized protein Sb10g022900 n=1 (Sorghum bicolor) Exp=0; maizesequence.org: Uniprot/SPTREMBL:C0PGV4; Putative uncharacterized protein | UniGene:Zm.36059; Transcribed locus strongly similar to NP_001169661.1 hypothetical protein LOC100383542 [Zea mays] | RefSeq_peptide:NP_001169661; hypothetical protein LOC100383542 | RefSeq_dna:NM_001176190; hypothetical protein LOC1…
GRMZM2G318803	1:201661038-201667170	253.828	242.973	-0.0630552		-0.172029	0.77	0.999071	no	C5YMQ0_SORBI Putative uncharacterized protein Sb07g023480 n=1 (Sorghum bicolor) Exp=0; maizesequence.org: GO:0005634; nucleus | GO:0008270; zinc ion binding | GO:0016568; chromatin modification | GO:0018024; histone-lysine N-methyltransferase activity | UniGene:Zm.126706; Transcribed locus moderately similar to XP_002489116.1 hypothetical protein SORBIDRAFT_0057s002040 [Sorghum bicolor] | UniGene…
GRMZM2G165011	1:201882382-201884831	0.950652	1.38497	0.542866		0.973849	0.089	0.586829	no	C5YMQ8_SORBI Putative uncharacterized protein Sb07g023560 n=1 (Sorghum bicolor) Exp=0; maizesequence.org: Uniprot/SPTREMBL:C0P7T5; Putative uncharacterized protein | UniGene:Zm.64882; Hypothetical protein LOC100382441 | RefSeq_peptide:NP_001168654; hypothetical protein LOC100382441 | RefSeq_dna:NM_001175183; hypothetical protein LOC100382441 (LOC100382441) mRNA | GO:0018024; histone-lysine N-meth…
GRMZM2G106928	1:203627014-203630358	80.7572	95.4849	0.241682		0.741602	0.19585	0.81427	no	C5YN49_SORBI Superoxide dismutase [Cu-Zn] n=3 (Andropogoneae) Exp=9e-84; maizesequence.org: Uniprot/SPTREMBL:B1PEY4; Superoxide dismutase [Cu-Zn] (EC 1.15.1.1) | Uniprot/SPTREMBL:B6T1E2; Superoxide dismutase [Cu-Zn] (EC 1.15.1.1) | Uniprot/SPTREMBL:D1MPZ7; Chloroplastic Cu/Zn superoxide dismutase Precursor; Fragment (EC 1.15.1.1) | Uniprot/SPTREMBL:D1MPZ8; Superoxide dismutase [Cu-Zn] (EC 1.15.1.…
GRMZM2G357804	1:204686876-204692903	37.9472	37.5478	-0.0152651		-0.0466129	0.93695	0.999071	no	C5YN68_SORBI Putative uncharacterized protein Sb07g024110 n=1 (Sorghum bicolor) Exp=0; maizesequence.org: UniGene:Zm.155291; TSA: Zea mays contig30022 mRNA sequence
GRMZM2G460383	1:207364506-207366640	2.76048	3.11596	0.174758		0.358805	0.51805	0.999071	no	B4FWS6_MAIZE Putative uncharacterized protein n=1 (Zea mays) Exp=1e-164; maizesequence.org: Uniprot/SPTREMBL:B4FWS6; Putative uncharacterized protein | UniGene:Zm.17296; Hypothetical protein LOC100273650 | RefSeq_peptide:NP_001141536; hypothetical protein LOC100273650 | RefSeq_dna:NM_001148064; hypothetical protein LOC100273650 (LOC100273650) mRNA | GO:0016787; hydrolase activity | GO:0008152; me…
GRMZM2G153184	1:213699823-213701540	1231.56	1357.28	0.140231		0.21196	0.69405	0.999071	no	B6SZR1_MAIZE Chlorophyll a-b binding protein 4 n=7 (Poaceae) Exp=5e-126; maizesequence.org: Uniprot/SPTREMBL:B6TNZ8; Chlorophyll a-b binding protein 4 | Uniprot/SPTREMBL:B6TFT2; Chlorophyll a-b binding protein 4 | Uniprot/SPTREMBL:B4FV94; Chlorophyll a-b binding protein 4Putative uncharacterized protein ; | UniGene:Zm.94384; Transcribed locus strongly similar to NP_001150371.1 LOC100284001 [Zea m…
GRMZM2G119357	1:216523957-216535607	14.8636	14.9972	0.0129096		0.0340701	0.95075	0.999071	no	B4FDH7_MAIZE DNA binding protein n=1 (Zea mays) Exp=1e-122; maizesequence.org: Uniprot/SPTREMBL:B4FDH7; DNA binding proteinPutative uncharacterized protein ; | UniGene:Zm.118101; LOC100193016 | RefSeq_peptide:NP_001131656; hypothetical protein LOC100193016 | RefSeq_dna:NM_001138184; LOC100193016 (pco138599a) mRNA | GO:0008270; zinc ion binding | GO:0005515; protein binding | GO:0003677; DNA bindi…
GRMZM2G146286	1:219431536-219437566	6.60725	8.34767	0.337324		0.856595	0.1464	0.732289	no	B4FFQ8_MAIZE Putative uncharacterized protein n=2 (Zea mays) Exp=4e-82; maizesequence.org: Uniprot/SPTREMBL:B4FYR5; Putative uncharacterized proteinRepressor protein ; | Uniprot/SPTREMBL:B4FFQ8; Putative uncharacterized protein | RefSeq_peptide:NP_001141894; hypothetical protein LOC100274041 | RefSeq_dna:NM_001148422; hypothetical protein LOC100274041 (LOC100274041) mRNA | GO:0043565; sequence-sp…
GRMZM2G074094	1:220057559-220061382	0.0247228	0.0181993	-0.441959		0	1	1	no	No significant hits (1e-5); maizesequence.org: GO:0018024; histone-lysine N-methyltransferase activity | GO:0016568; chromatin modification | GO:0008270; zinc ion binding | GO:0005634; nucleus
GRMZM2G469551	1:230596367-230608624	5.9199	5.20655	-0.185245		-0.518265	0.36065	0.956522	no	C5WYD4_SORBI Putative uncharacterized protein Sb01g019120 n=1 (Sorghum bicolor) Exp=0; maizesequence.org: Uniprot/SPTREMBL:B4FC19; Putative uncharacterized protein | UniGene:Zm.18857; Hypothetical protein LOC100192627 | RefSeq_peptide:NP_001131313; hypothetical protein LOC100192627 | RefSeq_dna:NM_001137841; hypothetical protein LOC100192627 (LOC100192627) mRNA | GO:0043565; sequence-specific DNA…
GRMZM2G133555	1:234118200-234121258	0.25	0.00453507	-5.78466		0	1	1	no	B6TLA4_MAIZE CCT motif family protein n=2 (Zea mays) Exp=2e-177; maizesequence.org: Uniprot/SPTREMBL:B6TLA4; CCT motif family protein | UniGene:Zm.10448; CCT motif family protein | RefSeq_peptide:NP_001150114; CCT motif family protein | RefSeq_dna:NM_001156642; CCT motif family protein (LOC100283743) mRNA | EntrezGene:100283743; CCT motif family protein
GRMZM2G379656	1:234479743-234481883	1.38047	1.43084	0.0517028		0.0818473	0.8861	0.999071	no	C5WZE9_SORBI Putative uncharacterized protein Sb01g019980 n=1 (Sorghum bicolor) Exp=2e-69
GRMZM2G011357	1:239667868-239671192	1.12156	1.28413	0.195284		0.328747	0.56085	0.999071	no	O65215_MAIZE Zinc finger protein ID1 n=1 (Zea mays) Exp=6e-169; maizesequence.org: Uniprot/SPTREMBL:O65215; Zinc finger protein ID1 | Uniprot/SPTREMBL:B7ZWW0; Putative uncharacterized protein | RefSeq_peptide:NP_001104909; indeterminate growth1 | RefSeq_dna:NM_001111439; indeterminate growth1 (id1) mRNA | GO:0008270; zinc ion binding | GO:0006355; regulation of transcription DNA-dependent | GO:00…
GRMZM2G138455	1:242766582-242768989	42.2164	43.844	0.0545759		0.166124	0.7682	0.999071	no	B6SVL9_MAIZE Putative uncharacterized protein n=1 (Zea mays) Exp=0; maizesequence.org: Uniprot/SPTREMBL:B6SVL9; Putative uncharacterized protein | UniGene:Zm.18635; Hypothetical protein LOC100275567 | UniGene:Zm.155282; TSA: Zea mays contig30063 mRNA sequence | RefSeq_peptide:NP_001143091; hypothetical protein LOC100275567 | RefSeq_dna:NM_001149619; hypothetical protein LOC100275567 (LOC100275567…
AC217264.3_FG005	1:246090025-246092492	0.0188677	0.0260565	0.465725		0	1	1	no	C5WUA4_SORBI Putative uncharacterized protein Sb01g015920 n=1 (Sorghum bicolor) Exp=6e-111; maizesequence.org: UniGene:Zm.120027; Transcribed locus moderately similar to XP_002466889.1 hypothetical protein SORBIDRAFT_01g015920 [Sorghum bicolor] | GO:0003677; DNA binding | UniGene:Zm.100730; Transcribed locus moderately similar to XP_002466889.1 hypothetical protein SORBIDRAFT_01g015920 [Sorghum b…
GRMZM2G441489	1:247676913-247691179	1.91213	2.04151	0.094456		0.0960682	0.87695	0.999071	no	C5WTC6_SORBI Putative uncharacterized protein Sb01g015440 n=1 (Sorghum bicolor) Exp=0; maizesequence.org: UniGene:Zm.36400; Transcribed locus weakly similar to XP_002466865.1 hypothetical protein SORBIDRAFT_01g015440 [Sorghum bicolor]
GRMZM2G140594	1:247676913-247691179	20.8321	17.7463	-0.23129		-0.665401	0.2494	0.874709	no	B6SVW6_MAIZE Putative uncharacterized protein n=1 (Zea mays) Exp=0; maizesequence.org: Uniprot/SPTREMBL:B6SVW6; Putative uncharacterized protein | UniGene:Zm.39973; Hypothetical protein LOC100275579 | RefSeq_peptide:NP_001143102; hypothetical protein LOC100275579 | RefSeq_dna:NM_001149630; hypothetical protein LOC100275579 (LOC100275579) mRNA | EntrezGene:100275579; hypothetical protein LOC100275…
GRMZM2G018627	1:247817663-247819376	2.59646	4.57068	0.815863		1.55613	0.00685	0.135162	no	CB23_ORYSJ Chlorophyll a-b binding protein, chloroplastic n=16 (Spermatophyta) Exp=1e-141; maizesequence.org: Uniprot/SPTREMBL:Q41823; Type II light-harvesting chlorophyll a /b-binding protein | Uniprot/SPTREMBL:Q08057; Putative light-harvesting chlorophyll A/B binding protein Fragment | Uniprot/SPTREMBL:B6T1H1; Chlorophyll a-b binding protein | Uniprot/SPTREMBL:B6SZT9; Chlorophyll a-b binding pr…
GRMZM2G032423	1:24930246-24942070	14.0636	12.7527	-0.141163		-0.392802	0.50085	0.999071	no	B6U6J6_MAIZE ABI3-interacting protein 2 n=3 (Andropogoneae) Exp=4e-110; maizesequence.org: Uniprot/SPTREMBL:C0PL58; Putative uncharacterized protein
GRMZM2G423337	1:251790147-251793176	14.0081	15.8359	0.176938		0.522295	0.36045	0.95649	no	C0PEZ8_MAIZE Putative uncharacterized protein n=1 (Zea mays) Exp=0; maizesequence.org: Uniprot/SPTREMBL:C0PN55; Putative uncharacterized protein | Uniprot/SPTREMBL:C0PEZ8; Putative uncharacterized protein | Uniprot/SPTREMBL:B4FYN4; Putative uncharacterized protein | Uniprot/SPTREMBL:B4FBT2; Putative uncharacterized protein | UniGene:Zm.67116; LOC100192557 | RefSeq_peptide:NP_001141882; hypothetic…
GRMZM2G090217	1:251873299-251887770	14.6354	12.1703	-0.266097		-0.744452	0.18705	0.80274	no	Q10G81_ORYSJ Os03g0640100 protein n=4 (Poaceae) Exp=0
GRMZM2G165042	1:252372665-252437995	33.7392	39.9179	0.24261		0.703084	0.21785	0.843153	no	B6SV80_MAIZE PIL5 n=1 (Zea mays) Exp=0; maizesequence.org: Uniprot/SPTREMBL:B6SV80; PIL5 | RefSeq_peptide:NP_001147809; PIL5 | RefSeq_dna:NM_001154337; PIL5 (LOC100281419) mRNA | GO:0045449; regulation of transcription | GO:0030528; transcription regulator activity | GO:0005634; nucleus | EntrezGene:100281419; PIL5
GRMZM2G045678	1:254619871-254621178	0.00629577	0.00668255	0.0860159		0	1	1	no	B6TQT6_MAIZE Dof domain, zinc finger family protein n=2 (Zea mays) Exp=2e-81; maizesequence.org: RefSeq_peptide:NP_001150537; dof domain zinc finger family protein | UniGene:Zm.136539; Dof domain zinc finger family protein | UniGene:Zm.86626; Dof domain zinc finger family protein | Uniprot/SPTREMBL:B6TEN5; Dof domain zinc finger family protein | Uniprot/SPTREMBL:B6TQT6; Dof domain zinc finger fam…
GRMZM2G011588	1:256542004-256549357	120.464	113.893	-0.080923		-0.201212	0.71795	0.999071	no	B6SWM4_MAIZE BEL1-related homeotic protein 30 n=2 (Andropogoneae) Exp=0; maizesequence.org: Uniprot/SPTREMBL:C0P2J5; Putative uncharacterized protein | Uniprot/SPTREMBL:B6SWM4; BEL1-related homeotic protein 30 | RefSeq_peptide:NP_001147963; BEL1-related homeotic protein 30 | GO:0043565; sequence-specific DNA binding | GO:0030528; transcription regulator activity | GO:0006355; regulation of transc…
GRMZM2G091964	1:263505894-263513358	34.3448	30.9649	-0.149458		-0.454154	0.43305	0.990381	no	B6TAR1_MAIZE Nuclear transcription factor Y subunit A-1 n=1 (Zea mays) Exp=1e-104; maizesequence.org: Uniprot/SPTREMBL:B6TAR1; Nuclear transcription factor Y subunit A-1Putative uncharacterized protein ; | UniGene:Zm.9733; Nuclear transcription factor Y subunit A-1 | RefSeq_peptide:NP_001149098; nuclear transcription factor Y subunit A-1 | RefSeq_dna:NM_001155626; nuclear transcription factor Y s…
GRMZM2G472693	1:26427474-26434152	15.9003	16.3391	0.0392745		0.121619	0.8313	0.999071	no	C0PG52_MAIZE Putative uncharacterized protein n=1 (Zea mays) Exp=0; maizesequence.org: Uniprot/SPTREMBL:C0PG52; Putative uncharacterized protein | UniGene:Zm.21822; Hypothetical protein LOC100383458 | RefSeq_peptide:NP_001169577; hypothetical protein LOC100383458 | RefSeq_dna:NM_001176106; hypothetical protein LOC100383458 (LOC100383458) mRNA | GO:0015629; actin cytoskeleton | GO:0007155; cell ad…
GRMZM2G052701	1:266623075-266627087	0.616908	0.770411	0.320573		0.484355	0.41395	0.983705	no	B4FU21_MAIZE Myosin-like protein n=1 (Zea mays) Exp=1e-79; maizesequence.org: Uniprot/SPTREMBL:B4FU21; Myosin-like proteinPutative uncharacterized protein ; | RefSeq_peptide:NP_001141171; hypothetical protein LOC100273257 | EntrezGene:100273257; hypothetical protein LOC100273257
GRMZM2G144346	1:267460403-267464660	63.566	48.9353	-0.37738		-0.955063	0.09795	0.615414	no	C5WN43_SORBI Putative uncharacterized protein Sb01g010420 n=1 (Sorghum bicolor) Exp=9e-147; maizesequence.org: GO:0005622; intracellular | GO:0008270; zinc ion binding | UniGene:Zm.99087; Transcribed locus
GRMZM2G157727	1:269373170-269395572	93.4128	101.503	0.11983		0.305587	0.58935	0.999071	no	No significant hits (1e-5); maizesequence.org: UniGene:Zm.138874; Hypothetical protein LOC100384268 | RefSeq_peptide:NP_001170304; hypothetical protein LOC100384268 | RefSeq_dna:NM_001176833; hypothetical protein LOC100384268 (LOC100384268) mRNA
GRMZM2G133169	1:270571159-270573052	0.0533423	0.0101501	-2.39379		0	1	1	no	C5WMW5_SORBI Putative uncharacterized protein Sb01g009740 n=1 (Sorghum bicolor) Exp=0; maizesequence.org: GO:0006355; regulation of transcription DNA-dependent | GO:0005634; nucleus | GO:0004879; ligand-dependent nuclear receptor activity | GO:0003677; DNA binding
GRMZM2G092091	1:272109896-272113700	0.339931	0.406154	0.256785		0.346561	0.544	0.999071	no	C5WM06_SORBI Putative uncharacterized protein Sb01g009380 n=2 (Andropogoneae) Exp=5e-168; maizesequence.org: Uniprot/SPTREMBL:B4FE10; Putative uncharacterized protein | UniGene:Zm.138161; LOC100193160 | UniGene:Zm.137297; Transcribed locus strongly similar to NP_001131789.1 hypothetical protein LOC100193160 [Zea mays] | RefSeq_peptide:NP_001131789; hypothetical protein LOC100193160 | RefSeq_dna:N…
GRMZM2G416426	1:273943292-273957883	4.28917	3.17154	-0.435515		-0.867016	0.1012	0.625823	no	C7IVT5_9POAL Putative uncharacterized protein n=1 (Saccharum hybrid cultivar) Exp=0
GRMZM2G058158	1:277041523-277051789	13.568	15.832	0.222635		0.625052	0.28045	0.902794	no	Q0ZQJ9_9POAL EMF2 n=1 (Dendrocalamus latiflorus) Exp=0; maizesequence.org: Uniprot/SPTREMBL:B4FZ76; Putative uncharacterized protein | UniGene:Zm.13557; LOC100274131 | RefSeq_peptide:NP_001141981; hypothetical protein LOC100274131 | RefSeq_dna:NM_001148509; LOC100274131 (gpm623) mRNA | GO:0032259; methylation | GO:0008270; zinc ion binding | GO:0008168; methyltransferase activity | GO:0005622; in…
GRMZM2G057935	1:277059619-277064623	15.9151	17.9817	0.176133		0.542765	0.34475	0.949736	no	PHYC_SORBI Phytochrome C n=12 (Andropogoneae) Exp=0; maizesequence.org: GO:0016020; membrane | GO:0017006; protein-tetrapyrrole linkage | GO:0018298; protein-chromophore linkage | GO:0042803; protein homodimerization activity | GO:0045449; regulation of transcription | UniGene:Zm.117963; TSA: Zea mays contig38917 mRNA sequence | Uniprot/SPTREMBL:Q6XFQ1; Phytochrome C1 apoprotein | GO:0009881; pho…
GRMZM2G087095	1:277377467-277415566	3.70953	4.49291	0.276414		0.592224	0.29715	0.916199	no	B4XAV3_MAIZE MADS-box transcription factor 34 n=6 (Zea mays) Exp=1e-89; maizesequence.org: Uniprot/SPTREMBL:Q84V74; M24 protein | Uniprot/SPTREMBL:B6TIT0; MADS-box transcription factor 34 | Uniprot/SPTREMBL:B4XAV5; ZMM24 MADS-box protein | Uniprot/SPTREMBL:B4FZ68; MADS-box transcription factor 34Putative uncharacterized protein ; | UniGene:Zm.4424; M24 protein | RefSeq_peptide:NP_001105149; m24 p…
GRMZM2G353114	1:280602638-280609457	0.25	0.00710878	-5.13618		0	1	1	no	C0P363_MAIZE Putative uncharacterized protein n=1 (Zea mays) Exp=3e-76; maizesequence.org: GO:0003676; nucleic acid binding | GO:0004386; helicase activity | GO:0005524; ATP binding
GRMZM2G065374	1:283670985-283676031	61.7008	60.3503	-0.0319283		-0.0912027	0.8701	0.999071	no	C5WY93_SORBI Putative uncharacterized protein Sb01g006190 n=1 (Sorghum bicolor) Exp=2e-149; maizesequence.org: Uniprot/SPTREMBL:C0PMM6; Putative uncharacterized protein | UniGene:Zm.84433; TSA: Zea mays contig48466 mRNA sequence | UniGene:Zm.6794; Hypothetical protein LOC100384229 | UniGene:Zm.156921; TSA: Zea mays contig07896 mRNA sequence | GO:0045449; regulation of transcription | GO:0030528; …
GRMZM2G015384	1:2871384-2894252	29.2027	26.68	-0.130343		-0.361165	0.53235	0.999071	no	ARP4_ORYSJ Actin-related protein 4 n=7 (Poaceae) Exp=0; maizesequence.org: Uniprot/SPTREMBL:B4FNB4; Putative uncharacterized protein | EntrezGene:100279759; LOC100279759 | GO:0005515; protein binding | RefSeq_peptide:NP_001146189; hypothetical protein LOC100279759 | Uniprot/SPTREMBL:B6TTQ6; Actin-like protein 6A | Uniprot/SPTREMBL:B7ZZT1; Putative uncharacterized protein
GRMZM2G137358	1:289407543-289418799	12.3789	11.5009	-0.106136		-0.268698	0.6377	0.999071	no	B6TPF3_MAIZE Protein SPATULA n=2 (Andropogoneae) Exp=2e-125; maizesequence.org: Uniprot/SPTREMBL:B6TPF3; Protein SPATULA | UniGene:Zm.66771; LOC100284039 | RefSeq_peptide:NP_001150409; LOC100284039 | RefSeq_dna:NM_001156937; LOC100284039 (pco098673) mRNA | GO:0045449; regulation of transcription | GO:0030528; transcription regulator activity | GO:0005634; nucleus | EntrezGene:100284039; LOC100284…
GRMZM2G151873	1:292486954-292494155	53.6841	34.3329	-0.644903		-1.99407	0.00085	0.029139	yes	C0PJ99_MAIZE Putative uncharacterized protein n=2 (Zea mays) Exp=1e-58; maizesequence.org: Uniprot/SPTREMBL:B4FUT4; Putative uncharacterized protein
GRMZM2G180452	1:29255140-29264299	22.6672	22.3496	-0.0203572		-0.0532176	0.92675	0.999071	no	C0HIR0_MAIZE Putative uncharacterized protein n=1 (Zea mays) Exp=5e-126; maizesequence.org: GO:0045449; regulation of transcription | GO:0030528; transcription regulator activity | GO:0005634; nucleus
GRMZM2G093725	1:293486115-293487783	0.155094	0.293034	0.917925		0.992761	0.0875	0.583795	no	B6SV34_MAIZE Putative uncharacterized protein n=1 (Zea mays) Exp=1e-69; maizesequence.org: GO:0003677; DNA binding | GO:0008270; zinc ion binding | GO:0045449; regulation of transcription
GRMZM2G053803	1:296082218-296088796	20.4814	18.0499	-0.182323		-0.567155	0.31835	0.930974	no	B6U8G5_MAIZE Acyl-CoA binding protein n=3 (Andropogoneae) Exp=0; maizesequence.org: GO:0000062; acyl-CoA binding | GO:0005515; protein binding
GRMZM2G351160	1:296088907-296096795	12.4309	13.6367	0.133564		0.397389	0.4858	0.999071	no	C0PLU8_MAIZE Putative uncharacterized protein n=1 (Zea mays) Exp=0; maizesequence.org: Uniprot/SPTREMBL:C0PLU8; Putative uncharacterized protein | UniGene:Zm.7555; Hypothetical protein LOC100384139 | UniGene:Zm.156875; Transcribed locus strongly similar to NP_001170190.1 hypothetical protein LOC100384139 [Zea mays] | UniGene:Zm.139120; TSA: Zea mays contig27754 mRNA sequence | RefSeq_peptide:NP_0…
GRMZM2G053299	1:296102631-296106489	36.8585	38.5334	0.0641121		0.199163	0.72915	0.999071	no	D1IVV3_VITVI Whole genome shotgun sequence of line PN40024, scaffold_44.assembly12x (Fragment) n=1 (Vitis vinifera) Exp=0; maizesequence.org: Uniprot/SPTREMBL:P93633; Actin Fragment | Uniprot/SPTREMBL:B4FVB1; Putative uncharacterized protein | UniGene:Zm.98690; Transcribed locus strongly similar to NP_001078769.1 ACT4 (ACTIN 4); structural constituent of cytoskeleton [Arabidopsis thaliana] | UniG…
GRMZM2G021642	1:298511150-298517982	27.3986	29.8404	0.123165		0.37755	0.51045	0.999071	no	C5WS28_SORBI Putative uncharacterized protein Sb01g001030 n=1 (Sorghum bicolor) Exp=1e-44; maizesequence.org: GO:0004969; histamine receptor activity | GO:0007186; G-protein coupled receptor protein signaling pathway | GO:0016021; integral to membrane | UniGene:Zm.34920; Transcribed locus moderately similar to XP_002466091.1 hypothetical protein SORBIDRAFT_01g001030 [Sorghum bicolor]
GRMZM2G415077	1:300821341-300824061	0.374265	0.639862	0.773701		0.252066	0.7701	0.999071	no	B6UG21_MAIZE Putative uncharacterized protein n=1 (Zea mays) Exp=2e-86; maizesequence.org: Uniprot/SPTREMBL:B6UG21; Putative uncharacterized protein | UniGene:Zm.142430; Hypothetical protein LOC100278975 | UniGene:Zm.1353; Transcribed locus strongly similar to NP_001145539.1 hypothetical protein LOC100278975 [Zea mays] | RefSeq_peptide:NP_001145539; hypothetical protein LOC100278975 | RefSeq_dna:…
GRMZM2G115070	1:300879226-300880127	0.0977772	0.25	1.35436		0	1	1	no	B6SQ50_MAIZE Putative uncharacterized protein n=1 (Zea mays) Exp=3e-94; maizesequence.org: EntrezGene:100275216; hypothetical protein LOC100275216 | GO:0003677; DNA binding | RefSeq_dna:NM_001149356; hypothetical protein LOC100275216 (LOC100275216) mRNA | RefSeq_peptide:NP_001142828; hypothetical protein LOC100275216 | Uniprot/SPTREMBL:B6SQ50; Putative uncharacterized protein
GRMZM2G089812	1:34599367-34602042	312.01	287.992	-0.115564		-0.311051	0.5925	0.999071	no	Q10P13_ORYSJ Histone-like transcription factor and archaeal histone family protein, expressed n=1 (Oryza sativa subsp. japonica) Exp=5e-62; maizesequence.org: Uniprot/SPTREMBL:B6SWV5; Nuclear transcription factor Y subunit C-1 | UniGene:Zm.37878; Nuclear transcription factor Y subunit C-1 | RefSeq_peptide:NP_001147992; nuclear transcription factor Y subunit C-1 | RefSeq_dna:NM_001154520; nuclear …
GRMZM2G327059	1:5080669-5086704	59.1231	43.4083	-0.445751		-1.25838	0.02695	0.318159	no	B6SYZ7_MAIZE BEL1-related homeotic protein 14 n=2 (Zea mays) Exp=5e-155; maizesequence.org: GO:0003700; transcription factor activity | GO:0005634; nucleus | GO:0006355; regulation of transcription DNA-dependent | GO:0030528; transcription regulator activity | GO:0043565; sequence-specific DNA binding
GRMZM2G317160	1:51014130-51020257	0.0118752	0.00380045	-1.64371		0	1	1	no	C0PPH9_MAIZE Putative uncharacterized protein n=1 (Zea mays) Exp=0; maizesequence.org: Uniprot/SPTREMBL:C0PPH9; Putative uncharacterized protein | UniGene:Zm.36913; Hypothetical protein LOC100384463 | RefSeq_peptide:NP_001170466; hypothetical protein LOC100384463 | RefSeq_dna:NM_001176995; hypothetical protein LOC100384463 (LOC100384463) mRNA | GO:0006355; regulation of transcription DNA-dependen…
GRMZM2G158662	1:57481232-57485126	24.8504	28.5907	0.202277		0.607053	0.28575	0.906125	no	B6U742_MAIZE Photolyase/blue-light receptor PHR2 n=3 (Andropogoneae) Exp=0; maizesequence.org: Uniprot/SPTREMBL:B6U742; Photolyase/blue-light receptor PHR2 | Uniprot/SPTREMBL:B4FBD9; Putative uncharacterized protein | UniGene:Zm.13617; Hypothetical protein LOC100192113 | RefSeq_peptide:NP_001131008; hypothetical protein LOC100192113 | RefSeq_dna:NM_001137536; hypothetical protein LOC100192113 (LO…
GRMZM2G083689	1:59063102-59089085	23.7834	20.1321	-0.240457		-0.746781	0.19035	0.806813	no	C5X0L6_SORBI Putative uncharacterized protein Sb01g035510 n=1 (Sorghum bicolor) Exp=0; maizesequence.org: Uniprot/SPTREMBL:C4IZJ3; Putative uncharacterized protein | UniGene:Zm.31727; TSA: Zea mays contig06439 mRNA sequence | UniGene:Zm.25447; Hypothetical protein LOC100384700 | UniGene:Zm.139093; TSA: Zea mays contig13057 mRNA sequence | GO:0016070; RNA metabolic process | GO:0005515; protein bi…
GRMZM2G134671	1:59766714-59771616	39.3895	44.557	0.177841		0.549338	0.34525	0.949762	no	C0PI33_MAIZE Putative uncharacterized protein n=1 (Zea mays) Exp=0; maizesequence.org: Uniprot/SPTREMBL:C0PI33; Putative uncharacterized protein | UniGene:Zm.26500; Hypothetical protein LOC100383648 | UniGene:Zm.130716; Transcribed locus | RefSeq_peptide:NP_001169764; hypothetical protein LOC100383648 | RefSeq_dna:NM_001176293; hypothetical protein LOC100383648 (LOC100383648) mRNA | GO:0008270; z…
GRMZM2G061624	1:61453634-61457337	5.3024	3.86833	-0.454935		-1.00924	0.0832	0.571283	no	B9F8H4_ORYSJ Putative uncharacterized protein n=2 (Oryza sativa) Exp=4e-168; maizesequence.org: RefSeq_dna:NM_001161349; hypothetical protein LOC100217140 (LOC100217140) mRNA | RefSeq_peptide:NP_001123596; LOC100170243 | RefSeq_peptide:NP_001154821; hypothetical protein LOC100217140 | UniGene:Zm.6074; Hypothetical protein LOC100217140 | UniGene:Zm.95848; LOC100170243 | Uniprot/SPTREMBL:B3F0L2; Pu…
GRMZM2G156827	1:62234033-62246886	6.34073	7.98876	0.333323		0.95028	0.0967	0.611606	no	C5WZM5_SORBI Putative uncharacterized protein Sb01g034875 (Fragment) n=1 (Sorghum bicolor) Exp=0
GRMZM2G382774	1:71219488-71224000	37.6919	47.3085	0.327845		0.875725	0.1297	0.697335	no	C5WWN3_SORBI ELF4-like protein n=4 (Andropogoneae) Exp=9e-45; maizesequence.org: Uniprot/SPTREMBL:B6SXG0; EARLY flowering 4 protein | UniGene:Zm.79494; EARLY flowering 4 protein | RefSeq_peptide:NP_001148036; EARLY flowering 4 protein | RefSeq_dna:NM_001154564; EARLY flowering 4 protein (LOC100281645) mRNA | EntrezGene:100281645; EARLY flowering 4 protein
GRMZM2G137502	1:72625012-72627421	0.0982579	0.109175	0.151997		0	1	1	no	B4FDW7_MAIZE Putative uncharacterized protein n=1 (Zea mays) Exp=4e-131; maizesequence.org: Uniprot/SPTREMBL:B4FDW7; Putative uncharacterized protein | UniGene:Zm.33078; Hypothetical protein LOC100193126 | RefSeq_peptide:NP_001131758; hypothetical protein LOC100193126 | RefSeq_dna:NM_001138286; hypothetical protein LOC100193126 (LOC100193126) mRNA | GO:0045449; regulation of transcription | GO:00…
GRMZM2G477287	1:80875823-80876762	0.0112927	0.25	4.46847		0	1	1	no	C5WUL2_SORBI Putative uncharacterized protein Sb01g031140 n=1 (Sorghum bicolor) Exp=2e-27; maizesequence.org: GO:0050826; response to freezing | GO:0050825; ice binding | GO:0042309; homoiothermy | GO:0006355; regulation of transcription DNA-dependent | GO:0003700; transcription factor activity | GO:0003677; DNA binding
GRMZM2G030529	1:82020740-82030263	3.66601	4.60114	0.327781		0.97329	0.09465	0.605211	no	C5WUG8_SORBI Putative uncharacterized protein Sb01g030750 n=1 (Sorghum bicolor) Exp=0; maizesequence.org: UniGene:Zm.122675; TSA: Zea mays contig45686 mRNA sequence | UniGene:Zm.25053; Transcribed locus moderately similar to XP_002442527.1 hypothetical protein SORBIDRAFT_08g021383 [Sorghum bicolor] | UniGene:Zm.5131; TSA: Zea mays contig26174 mRNA sequence
GRMZM2G064466	1:82921481-82926989	9.15677	8.29366	-0.14283		-0.394788	0.5017	0.999071	no	B6SWE5_MAIZE Bell-like homeodomain protein 3 n=1 (Zea mays) Exp=0; maizesequence.org: Uniprot/SPTREMBL:B6SWE5; Bell-like homeodomain protein 3 | UniGene:Zm.126011; Bell-like homeodomain protein 3 | RefSeq_peptide:NP_001147936; bell-like homeodomain protein 3 | RefSeq_dna:NM_001154464; bell-like homeodomain protein 3 (LOC100281545) mRNA | GO:0043565; sequence-specific DNA binding | GO:0030528; tra…
GRMZM2G125095	1:83653654-83654919	0.86059	0.80924	-0.0887584		-0.122504	0.8283	0.999071	no	C5WUE4_SORBI Putative uncharacterized protein Sb01g030520 n=1 (Sorghum bicolor) Exp=1e-105; maizesequence.org: GO:0006355; regulation of transcription DNA-dependent | GO:0003677; DNA binding
GRMZM2G098208	1:95094429-95100116	53.0538	49.9623	-0.0866162		-0.266243	0.6457	0.999071	no	Q336R5_ORYSJ Casein kinase II beta-4 subunit, putative, expressed n=9 (Poaceae) Exp=1e-125; maizesequence.org: Uniprot/SPTREMBL:Q9FQF7; Protein kinase CK2 regulatory subunit CK2B2 | Uniprot/SPTREMBL:B6SQ06; Casein kinase II subunit beta-4Putative uncharacterized protein ; | RefSeq_peptide:NP_001105624; protein kinase CK2 regulatory subunit CK2B2 | RefSeq_dna:NM_001112154; protein kinase CK2 regul…
GRMZM2G006765	2:140689328-140694012	12.9486	11.1934	-0.210148		-0.481093	0.39485	0.975095	no	ACT11_ARATH Actin-11 n=9 (Viridiplantae) Exp=0
GRMZM2G135446	2:141518104-141523424	18.8862	17.4441	-0.114593		-0.354921	0.5435	0.999071	no	B4FPX9_MAIZE Putative uncharacterized protein n=1 (Zea mays) Exp=0; maizesequence.org: Uniprot/SPTREMBL:B4FPX9; Putative uncharacterized protein | UniGene:Zm.1812; LOC100272683 | UniGene:Zm.126712; TSA: Zea mays contig53959 mRNA sequence | RefSeq_peptide:NP_001140611; hypothetical protein LOC100272683 | RefSeq_dna:NM_001147139; LOC100272683 (TIDP3698) mRNA | EntrezGene:100272683; LOC100272683
GRMZM2G162737	2:146683823-146686291	2.72627	3.97078	0.542494		1.18754	0.0407	0.401114	no	B6TYK2_MAIZE Cytochrome P450 CYP90A22v2 n=1 (Zea mays) Exp=0; maizesequence.org: Uniprot/SPTREMBL:B6TYK2; Cytochrome P450 CYP90A22v2 | UniGene:Zm.76281; Clone 339347 cytochrome P450 CYP90A22v2 | GO:0055114; oxidation reduction | GO:0020037; heme binding | GO:0009055; electron carrier activity | GO:0005506; iron ion binding | GO:0004497; monooxygenase activity
GRMZM2G076415	2:146757560-146761043	2.22602	1.18771	-0.906284		-1.59379	0.00815	0.151158	no	B4FKA1_MAIZE Myosin-like protein n=2 (Andropogoneae) Exp=9e-127; maizesequence.org: EntrezGene:100282581; myosin-like protein | RefSeq_peptide:NP_001148961; myosin-like protein | Uniprot/SPTREMBL:B4FKA1; Myosin-like proteinPutative uncharacterized protein ; | Uniprot/SPTREMBL:C0PE59; Putative uncharacterized protein
GRMZM2G421256	2:14726072-14733163	10.3934	6.64797	-0.644682		-1.4909	0.01285	0.201839	no	C0HI52_MAIZE Putative uncharacterized protein n=1 (Zea mays) Exp=0; maizesequence.org: Uniprot/SPTREMBL:C0HI52; Putative uncharacterized protein | Uniprot/SPTREMBL:B6UHE6; Putative uncharacterized protein | RefSeq_peptide:NP_001145595; hypothetical protein LOC100279070 | RefSeq_dna:NM_001152123; hypothetical protein LOC100279070 (LOC100279070) mRNA | EntrezGene:100279070; hypothetical protein LOC…
GRMZM2G074351	2:148737323-148748187	5.18503	6.28977	0.278655		0.688275	0.2083	0.829441	no	C5Y429_SORBI Putative uncharacterized protein Sb05g002130 n=2 (Andropogoneae) Exp=0; maizesequence.org: GO:0003676; nucleic acid binding | Uniprot/SPTREMBL:C0P363; Putative uncharacterized protein
GRMZM2G115628	2:149302338-149303546	0.237191	0.203603	-0.22029		-0.230331	0.6841	0.999071	no	B6U186_MAIZE Calmodulin n=1 (Zea mays) Exp=1e-85; maizesequence.org: Uniprot/SPTREMBL:B6U186; Calmodulin | UniGene:Zm.122498; Calmodulin | RefSeq_peptide:NP_001151507; calmodulin | RefSeq_dna:NM_001158035; calmodulin (LOC100285141) mRNA | GO:0005509; calcium ion binding | EntrezGene:100285141; calmodulin
GRMZM2G124524	2:149971655-149977527	0.512384	0.560045	0.128317		0.185723	0.74795	0.999071	no	B6T5I4_MAIZE AP2/EREBP transcriptional factor WRI1 n=2 (Zea mays) Exp=0; maizesequence.org: Uniprot/SPTREMBL:B6T5I4; AP2/EREBP transcriptional factor WRI1 | Uniprot/SPTREMBL:B4FM46; Putative uncharacterized protein | UniGene:Zm.8972; Hypothetical protein LOC100217237 | RefSeq_peptide:NP_001137064; hypothetical protein LOC100217237 | RefSeq_dna:NM_001143592; hypothetical protein LOC100217237 (LOC1…
GRMZM2G102059	2:15033724-15039509	5.00295	4.61776	-0.115586		-0.267412	0.6447	0.999071	no	C5YEI6_SORBI Putative uncharacterized protein Sb06g026370 n=1 (Sorghum bicolor) Exp=1e-134; maizesequence.org: UniGene:Zm.33238; Clone 687366 mRNA sequence | UniGene:Zm.152379; TSA: Zea mays contig03018 mRNA sequence | GO:0006355; regulation of transcription DNA-dependent | GO:0003677; DNA binding
GRMZM2G015080	2:150778729-150782555	8.15587	8.03113	-0.0222358		-0.0603241	0.91385	0.999071	no	SCR_MAIZE Protein SCARECROW n=1 (Zea mays) Exp=0; maizesequence.org: UniGene:Zm.14757; Transcribed locus moderately similar to NP_001168484.1 protein SCARECROW [Zea mays] | GO:0009405; pathogenesis | GO:0006355; regulation of transcription DNA-dependent | GO:0005634; nucleus | GO:0004879; ligand-dependent nuclear receptor activity | GO:0003677; DNA binding
GRMZM2G160702	2:1555746-1564733	1.92277	1.42403	-0.433207		-0.98011	0.09395	0.602537	no	Q7XKB3_ORYSJ OSJNBa0064G10.18 protein n=3 (Oryza sativa) Exp=3e-163; maizesequence.org: UniGene:Zm.27559; Transcribed locus weakly similar to NP_001054267.1 Os04g0677700 [Oryza sativa (japonica cultivar-group)] | UniGene:Zm.150706; TSA: Zea mays contig10969 mRNA sequence | UniGene:Zm.145006; TSA: Zea mays contig50669 mRNA sequence | GO:0045449; regulation of transcription | GO:0005634; nucleus
GRMZM2G313944	2:156485749-156539237	10.1395	11.0653	0.126056		0.308477	0.59645	0.999071	no	C5X873_SORBI Putative uncharacterized protein Sb02g019320 n=1 (Sorghum bicolor) Exp=0; maizesequence.org: UniGene:Zm.139627; TSA: Zea mays contig09035 mRNA sequence | UniGene:Zm.153230; TSA: Zea mays contig39180 mRNA sequence
GRMZM2G013936	2:156485749-156539237	10.1395	11.0653	0.126056		0.308477	0.59645	0.999071	no	B9G0E7_ORYSJ Putative uncharacterized protein n=1 (Oryza sativa subsp. japonica) Exp=2e-151; maizesequence.org: GO:0005515; protein binding | GO:0008270; zinc ion binding
GRMZM2G102829	2:163100313-163106027	202.438	174.231	-0.216479		-0.498022	0.3784	0.966904	no	Q6YYV1_ORYSJ Os09g0115400 protein n=2 (Oryza sativa) Exp=0; maizesequence.org: Uniprot/SPTREMBL:C0HIX4; Putative uncharacterized protein | UniGene:Zm.87703; Hypothetical protein LOC100381794 | UniGene:Zm.27104; Full-length cDNA clone ZM_BFb0337L02 | UniGene:Zm.148463; TSA: Zea mays contig21517 mRNA sequence | RefSeq_peptide:NP_001168063; hypothetical protein LOC100381794 | RefSeq_dna:NM_001174592…
GRMZM2G065276	2:163595657-163618909	24.844	23.2196	-0.0975544		-0.26332	0.6479	0.999071	no	C0PDQ9_MAIZE Putative uncharacterized protein n=1 (Zea mays) Exp=0; maizesequence.org: UniGene:Zm.122561; Transcribed locus strongly similar to NP_001169298.1 hypothetical protein LOC100383162 [Zea mays] | GO:0003723; RNA binding | GO:0003676; nucleic acid binding
GRMZM2G462690	2:163671557-163688690	0.00392755	0.00406182	0.0484967		0	1	1	no	C1KGA5_MAIZE Cryptochrome 1 n=1 (Zea mays) Exp=1e-78; maizesequence.org: GO:0016747; transferase activity transferring acyl groups other than amino-acyl groups | GO:0006281; DNA repair | GO:0003913; DNA photolyase activity
GRMZM2G000601	2:173344294-173348659	10.4693	10.4433	-0.00358732		-0.00858128	0.98845	0.999071	no	Q69JN7_ORYSJ Ubiquitin carrier protein n=11 (Spermatophyta) Exp=8e-75; maizesequence.org: Uniprot/SPTREMBL:C0HHI6; Ubiquitin carrier protein (EC 6.3.2.-) | Uniprot/SPTREMBL:B6U4K0; Ubiquitin carrier protein (EC 6.3.2.-) | RefSeq_peptide:NP_001151778; ubiquitin-conjugating enzyme E2-17 kDa | RefSeq_dna:NM_001158306; ubiquitin-conjugating enzyme E2-17 kDa (LOC100285413) mRNA | GO:0051246; regulatio…
GRMZM2G033694	2:174419090-174436402	4.53991	3.77336	-0.266814		-0.618654	0.2798	0.902549	no	Q8H6A9_MAIZE Histone-lysine N-methyltransferase, H3 lysine-36 and H4 lysine-20specific n=3 (Andropogoneae) Exp=0; maizesequence.org: Uniprot/SPTREMBL:B4FVH7; Histone-lysine N-methyltransferase H3 lysine-36 and H4 lysine-20specificPutative uncharacterized protein ; | UniGene:Zm.96327; Histone-lysine N-methyltransferase H3 lysine-36 and H4 lysine-20specific | RefSeq_peptide:NP_001149253; histone-ly…
GRMZM2G138178	2:174739893-174753737	15.7569	17.0529	0.114033		0.354138	0.53315	0.999071	no	Q69KN1_ORYSJ cDNA, clone: J100045B11, full insert sequence n=2 (Oryza sativa) Exp=0; maizesequence.org: GO:0008152; metabolic process | GO:0016740; transferase activity
GRMZM2G300955	2:177370535-177376011	5.12912	5.31883	0.0523976		0.150973	0.79315	0.999071	no	C5XAP1_SORBI Putative uncharacterized protein Sb02g022936 n=1 (Sorghum bicolor) Exp=0; maizesequence.org: UniGene:Zm.24887; Clone 370396 mRNA sequence | GO:0018024; histone-lysine N-methyltransferase activity | GO:0016568; chromatin modification | GO:0008270; zinc ion binding | GO:0005634; nucleus
GRMZM2G117412	2:184661295-184663732	31.2255	32.8553	0.0734014		0.215477	0.70795	0.999071	no	B4FVG9_MAIZE Putative uncharacterized protein n=1 (Zea mays) Exp=4e-140; maizesequence.org: Uniprot/SPTREMBL:C0P520; Putative uncharacterized protein | UniGene:Zm.144212; TSA: Zea mays contig56961 mRNA sequence
GRMZM2G019863	2:18623439-18626564	2.81773	2.73584	-0.0425495		-0.10143	0.8568	0.999071	no	B6SXR1_MAIZE Flowering locus D n=2 (Andropogoneae) Exp=0; maizesequence.org: Uniprot/SPTREMBL:B6SXR1; Flowering locus D | GO:0050661; NADP or NADPH binding | GO:0055114; oxidation reduction | RefSeq_dna:NM_001154598; flowering locus D (LOC100281678) mRNA | RefSeq_peptide:NP_001148070; flowering locus D | UniGene:Zm.127459; Flowering locus D | GO:0050660; FAD binding | GO:0016491; oxidoreductase a…
GRMZM2G002075	2:186805630-186808459	18.2523	13.8555	-0.397619		-1.15652	0.0431	0.415056	no	B4F831_MAIZE BZIP transcription factor n=1 (Zea mays) Exp=5e-101; maizesequence.org: Uniprot/SPTREMBL:B4F831; BZIP transcription factorPutative uncharacterized protein ; | UniGene:Zm.119584; Hypothetical protein LOC100191233 | RefSeq_peptide:NP_001130139; hypothetical protein LOC100191233 | RefSeq_dna:NM_001136667; hypothetical protein LOC100191233 (LOC100191233) mRNA | GO:0046983; protein dimeri…
GRMZM2G137541	2:189054252-189057549	0.00847162	0.00569617	-0.572646		0	1	1	no	B6UFP4_MAIZE DNA binding protein n=2 (Zea mays) Exp=0; maizesequence.org: RefSeq_peptide:NP_001169165; hypothetical protein LOC100383015 | UniGene:Zm.139758; Hypothetical protein LOC100383015 | UniGene:Zm.154582; TSA: Zea mays contig32943 mRNA sequence | UniGene:Zm.31379; DNA binding protein | Uniprot/SPTREMBL:B6UFP4; DNA binding protein | Uniprot/SPTREMBL:C0PCC9; Putative uncharacterized protein…
GRMZM2G009406	2:189176443-189178274	0.745614	0.527617	-0.498938		-0.717837	0.20955	0.831165	no	B6UBV5_MAIZE Dof zinc finger protein MNB1A n=3 (Zea mays) Exp=1e-93; maizesequence.org: RefSeq_peptide:NP_001132540; hypothetical protein LOC100194004 | UniGene:Zm.119857; Hypothetical protein LOC100194004 | UniGene:Zm.94; DNA binding with one finger2 | Uniprot/SPTREMBL:B4FH27; Putative uncharacterized protein | Uniprot/SPTREMBL:B6UBV5; Dof zinc finger protein MNB1A | Uniprot/SPTREMBL:Q41800; Dof…
GRMZM2G126018	2:190489084-190493109	0.0251399	0.0359145	0.514588		0	1	1	no	B4FLF0_MAIZE Putative uncharacterized protein n=1 (Zea mays) Exp=5e-156; maizesequence.org: Uniprot/SPTREMBL:C4IZU2; Putative uncharacterized protein | Uniprot/SPTREMBL:B4FLF0; Putative uncharacterized protein | RefSeq_peptide:NP_001136945; hypothetical protein LOC100217104 | RefSeq_dna:NM_001143473; hypothetical protein LOC100217104 (LOC100217104) mRNA | GO:0005634; nucleus | GO:0003677; DNA bin…
GRMZM2G158884	2:191584857-191589354	2.46366	2.04091	-0.271591		-0.492781	0.39955	0.976711	no	B7ZYR3_MAIZE Putative uncharacterized protein n=1 (Zea mays) Exp=0; maizesequence.org: GO:0003723; RNA binding
GRMZM2G083504	2:192028338-192031016	0.442698	0.329571	-0.425734		-0.534363	0.3545	0.954096	no	B4FIY8_MAIZE Putative uncharacterized protein n=1 (Zea mays) Exp=2e-150; maizesequence.org: Uniprot/SPTREMBL:B4FIY8; Putative uncharacterized protein | UniGene:Zm.100028; Hypothetical protein LOC100216628 | RefSeq_peptide:NP_001136513; hypothetical protein LOC100216628 | RefSeq_dna:NM_001143041; hypothetical protein LOC100216628 (LOC100216628) mRNA | GO:0045449; regulation of transcription | GO:0…
GRMZM2G061734	2:192807844-192812893	0.0726093	0.0584246	-0.313578		0	1	1	no	B7ZX33_MAIZE Putative uncharacterized protein n=1 (Zea mays) Exp=0; maizesequence.org: Uniprot/SPTREMBL:B7ZX33; Putative uncharacterized protein | UniGene:Zm.18751; Hypothetical protein LOC100279240 | RefSeq_peptide:NP_001145733; hypothetical protein LOC100279240 | RefSeq_dna:NM_001152261; hypothetical protein LOC100279240 (LOC100279240) mRNA | GO:0050826; response to freezing | GO:0050825; ice b…
GRMZM2G129034	2:192877044-192885419	0.25	0.0304095	-3.03933		0	1	1	no	B6T736_MAIZE MADS-box transcription factor 8 n=6 (Andropogoneae) Exp=4e-130; maizesequence.org: Uniprot/SPTREMBL:Q84V68; Putative MADS-domain transcription factorPutative uncharacterized protein ; | Uniprot/SPTREMBL:C0PL29; Putative uncharacterized protein | Uniprot/SPTREMBL:B4F8G0; Putative uncharacterized protein | UniGene:Zm.1703; M27 protein | RefSeq_peptide:NP_001105525; m27 protein | RefSeq…
GRMZM2G178182	2:193433357-193435869	0.0168264	0.0162204	-0.0529171		0	1	1	no	B6TV34_MAIZE BHLH transcription factor GBOF-1 n=2 (Zea mays) Exp=6e-113; maizesequence.org: GO:0005634; nucleus | GO:0030528; transcription regulator activity | GO:0045449; regulation of transcription
GRMZM2G158809	2:193839588-193845094	0.182185	0.206998	0.184213		0	1	1	no	A8WES9_MAIZE ZCN18 n=3 (Andropogoneae) Exp=1e-98; maizesequence.org: Uniprot/SPTREMBL:A8WES9; ZCN18 | UniGene:Zm.103093; ZCN18 protein | RefSeq_peptide:NP_001106255; ZCN18 protein | RefSeq_dna:NM_001112784; ZCN18 protein (ZCN18) mRNA | GenBank:EU241933; product:ZCN18 | EntrezGene:100127527; ZCN18 protein
AC199782.5_FG003	2:195005256-195006904	1.7529	1.93024	0.139037		0.247429	0.673	0.999071	no	B4FBV6_MAIZE Putative uncharacterized protein n=1 (Zea mays) Exp=1e-134; maizesequence.org: Uniprot/SPTREMBL:B4FBV6; Putative uncharacterized protein | UniGene:Zm.31339; Hypothetical protein LOC100192578 | RefSeq_peptide:NP_001131265; hypothetical protein LOC100192578 | RefSeq_dna:NM_001137793; hypothetical protein LOC100192578 (LOC100192578) mRNA | EntrezGene:100192578; hypothetical protein LOC1…
GRMZM2G124011	2:195135263-195136246	0.0293541	0.193553	2.72109		0	1	1	no	B6UHM5_MAIZE SbCBF6 n=1 (Zea mays) Exp=4e-82; maizesequence.org: Uniprot/SPTREMBL:B6UHM5; SbCBF6 | UniGene:Zm.32560; SbCBF6 | RefSeq_peptide:NP_001152672; sbCBF6 | RefSeq_dna:NM_001159200; sbCBF6 (LOC100286313) mRNA | GO:0006355; regulation of transcription DNA-dependent | GO:0003700; transcription factor activity | GO:0003677; DNA binding | EntrezGene:100286313; sbCBF6
GRMZM2G105869	2:200022819-200045662	5.59019	4.27578	-0.38671		-0.641343	0.2666	0.890974	no	B6TYP5_MAIZE Histone-lysine N-methyltransferase SUVR3 n=2 (Andropogoneae) Exp=1e-71
GRMZM2G172936	2:20632552-20633410	0.057311	0.0548402	-0.0635782		0	1	1	no	B6TJZ1_MAIZE Dehydration-responsive element-binding protein 1C n=1 (Zea mays) Exp=1e-61; maizesequence.org: GO:0050826; response to freezing | RefSeq_dna:NM_001156520; dehydration-responsive element-binding protein 1C (LOC100283619) mRNA | RefSeq_peptide:NP_001149992; dehydration-responsive element-binding protein 1C | UniGene:Zm.125063; Dehydration-responsive element-binding protein 1C | Uniprot…
GRMZM2G089159	2:207080134-207083546	14.6548	11.2287	-0.384182		-1.16385	0.0411	0.40334	no	C5XCB4_SORBI Putative uncharacterized protein Sb02g037070 n=2 (Andropogoneae) Exp=0; maizesequence.org: Uniprot/SPTREMBL:C0PE74; Putative uncharacterized protein | Uniprot/SPTREMBL:B4FW86; Putative uncharacterized protein | RefSeq_peptide:NP_001141442; hypothetical protein LOC100273552 | GO:0006468; protein amino acid phosphorylation | GO:0005524; ATP binding | GO:0004674; protein serine/threonin…
GRMZM2G325513	2:20726310-20727441	0.468481	0.205283	-1.19038		-1.27826	0.02525	0.306417	no	B6SUC3_MAIZE Dehydration-responsive element-binding protein 1B n=1 (Zea mays) Exp=1e-34; maizesequence.org: GO:0050826; response to freezing | RefSeq_dna:NM_001154241; dehydration-responsive element-binding protein 1B (LOC100281323) mRNA | RefSeq_peptide:NP_001147713; dehydration-responsive element-binding protein 1B | Uniprot/SPTREMBL:B6SUC3; Dehydration-responsive element-binding protein 1B | G…
GRMZM2G113396	2:207562831-207569682	20.4073	16.0536	-0.346188		-0.88945	0.1171	0.668641	no	B6T544_MAIZE Ubiquitin-conjugating enzyme E2 E3 n=4 (Andropogoneae) Exp=6e-78; maizesequence.org: Uniprot/SPTREMBL:C0HHC7; Putative uncharacterized protein | Uniprot/SPTREMBL:B6T544; Ubiquitin-conjugating enzyme E2 E3 | UniGene:Zm.35210; Ubiquitin-conjugating enzyme E2 E3 | RefSeq_peptide:NP_001148609; ubiquitin-conjugating enzyme E2 E3 | RefSeq_dna:NM_001155137; ubiquitin-conjugating enzyme E2 E…
GRMZM2G038519	2:207611860-207618663	1006.9	1175.43	0.223268		0.359218	0.52725	0.999071	no	B6T892_MAIZE Chlorophyll a-b binding protein n=2 (Zea mays) Exp=3e-122; maizesequence.org: EntrezGene:100191715; hypothetical protein LOC100191715 | RefSeq_dna:NM_001137144; hypothetical protein LOC100191715 (LOC100191715) mRNA | RefSeq_peptide:NP_001130616; hypothetical protein LOC100191715 | Uniprot/SPTREMBL:B4F9W3; Putative uncharacterized protein | Uniprot/SPTREMBL:B6TKL9; Chlorophyll a-b bin…
GRMZM2G175718	2:209682964-209689963	5.09588	5.5136	0.113663		0.283308	0.6255	0.999071	no	B4FAW4_MAIZE Putative uncharacterized protein n=1 (Zea mays) Exp=0; maizesequence.org: Uniprot/SPTREMBL:B4FAW4; Putative uncharacterized protein | UniGene:Zm.22654; LOC100191985 | RefSeq_peptide:NP_001130881; hypothetical protein LOC100191985 | RefSeq_dna:NM_001137409; LOC100191985 (si605094e02a) mRNA | EntrezGene:100191985; LOC100191985
GRMZM2G180947	2:211052665-211054021	1.93665	1.24162	-0.64134		-1.02804	0.0714	0.536069	no	C5XDX7_SORBI Putative uncharacterized protein Sb02g038870 n=1 (Sorghum bicolor) Exp=6e-74; maizesequence.org: UniGene:Zm.53881; Transcribed locus | GO:0043565; sequence-specific DNA binding | GO:0006355; regulation of transcription DNA-dependent | GO:0005634; nucleus | GO:0005622; intracellular | GO:0003677; DNA binding
GRMZM2G040349	2:211453450-211457855	11.7269	15.179	0.372255		1.04932	0.0702	0.531654	no	B4FHR0_MAIZE Nuclear transcription factor Y subunit A-3 n=3 (Zea mays) Exp=1e-161; maizesequence.org: Uniprot/SPTREMBL:C0PDN4; Putative uncharacterized protein | Uniprot/SPTREMBL:B6TI90; Nuclear transcription factor Y subunit A-3 | Uniprot/SPTREMBL:B4FHR0; Nuclear transcription factor Y subunit A-3Putative uncharacterized protein ; | RefSeq_peptide:NP_001132701; hypothetical protein LOC100194182 …
GRMZM2G010505	2:217262584-217267899	3.67361	3.64275	-0.0121705		-0.0275096	0.96375	0.999071	no	Q75K43_ORYSJ Putative sentrin-specific protease n=2 (Oryza sativa) Exp=2e-104; maizesequence.org: GO:0006508; proteolysis | GO:0008234; cysteine-type peptidase activity
GRMZM2G395244	2:218313413-218316109	9.52575	11.7155	0.298514		0.778923	0.1765	0.783624	no	UPI0000DD8A7A Os01g0267900 n=1 (Oryza sativa subsp. japonica) Exp=9e-81; maizesequence.org: Uniprot/SPTREMBL:Q43698; Calmodulin | Uniprot/SPTREMBL:D0F042; Calmodulin Fragment | Uniprot/SPTREMBL:B6T148; Calmodulin | Uniprot/SPTREMBL:B4FQS6; Putative uncharacterized protein | Uniprot/SPTREMBL:B4FBW7; CalmodulinPutative uncharacterized protein ; | RefSeq_peptide:NP_001167666; calmodulin | RefSeq_pep…
GRMZM2G062019	2:219824773-219826185	0.0358056	0.25	2.80367		0	1	1	no	B6TWT9_MAIZE Gibberellin receptor GID1L2 n=2 (Andropogoneae) Exp=5e-178; maizesequence.org: Uniprot/SPTREMBL:B6TWT9; Gibberellin receptor GID1L2 | UniGene:Zm.126861; Gibberellin receptor GID1L2 | RefSeq_peptide:NP_001151089; gibberellin receptor GID1L2 | RefSeq_dna:NM_001157617; gibberellin receptor GID1L2 (LOC100284722) mRNA | GO:0016787; hydrolase activity | GO:0008152; metabolic process | Entr…
GRMZM2G067915	2:219837995-219839596	34.0637	31.1344	-0.129726		-0.398574	0.49055	0.999071	no	C5Y862_SORBI Putative uncharacterized protein Sb05g007270 n=1 (Sorghum bicolor) Exp=6e-147; maizesequence.org: UniGene:Zm.29624; TSA: Zea mays contig53780 mRNA sequence | GO:0016787; hydrolase activity | GO:0008152; metabolic process
GRMZM2G105317	2:225260745-225264801	12.7302	13.9749	0.134583		0.370054	0.52325	0.999071	no	B6SI55_MAIZE Repressor protein n=4 (Andropogoneae) Exp=1e-104; maizesequence.org: UniGene:Zm.105066; Transcribed locus | GO:0043565; sequence-specific DNA binding | GO:0005622; intracellular | GO:0003677; DNA binding
GRMZM2G408768	2:225571060-225574852	276.659	237.802	-0.218348		-0.553922	0.33885	0.944521	no	14334_ORYSJ 14-3-3-like protein GF14-D n=11 (Poaceae) Exp=8e-124; maizesequence.org: Uniprot/SWISSPROT:P29306; 14-3-3-like protein Fragment | Uniprot/SPTREMBL:B4FRG1; 14-3-3-like proteinPutative uncharacterized protein ; | UniGene:Zm.95160; Hypothetical LOC542285 | GO:0019904; protein domain specific binding
GRMZM2G107945	2:225575239-225579603	23.1108	19.6375	-0.234956		-0.732823	0.2051	0.826045	no	C5Y3X8_SORBI Putative uncharacterized protein Sb05g021030 n=5 (Poaceae) Exp=0; maizesequence.org: UniGene:Zm.24720; Hypothetical protein LOC100383277 | RefSeq_peptide:NP_001169408; hypothetical protein LOC100383277 | RefSeq_dna:NM_001175937; hypothetical protein LOC100383277 (LOC100383277) mRNA | GO:0007165; signal transduction | GO:0006355; regulation of transcription DNA-dependent | GO:0005515;…
GRMZM2G170934	2:234342801-234349545	52.9981	41.9602	-0.336919		-0.982006	0.08235	0.568536	no	C5XAE2_SORBI Putative uncharacterized protein Sb02g004090 n=1 (Sorghum bicolor) Exp=4e-163; maizesequence.org: Uniprot/SPTREMBL:B7ZY57; Putative uncharacterized protein | UniGene:Zm.97508; Hypothetical protein LOC100279445 | UniGene:Zm.144973; TSA: Zea mays contig50903 mRNA sequence | UniGene:Zm.143486; TSA: Zea mays contig62361 mRNA sequence | RefSeq_peptide:NP_001145922; hypothetical protein LO…
GRMZM2G362718	2:235069697-235079226	9.05508	7.75343	-0.223893		-0.674956	0.2396	0.865449	no	C5XA71_SORBI Putative uncharacterized protein Sb02g003420 n=1 (Sorghum bicolor) Exp=2e-177; maizesequence.org: UniGene:Zm.26131; Transcribed locus weakly similar to NP_001061580.1 Os08g0337300 [Oryza sativa Japonica Group] | UniGene:Zm.143455; TSA: Zea mays contig62621 mRNA sequence | UniGene:Zm.128754; Transcribed locus moderately similar to XP_002461485.1 hypothetical protein SORBIDRAFT_02g0034…
GRMZM2G078033	2:2366061-2369774	65.9138	68.8095	0.0620272		0.184659	0.74215	0.999071	no	B4F9F6_MAIZE Lysine-specific histone demethylase 1 n=3 (Andropogoneae) Exp=0; maizesequence.org: Uniprot/SPTREMBL:B6SZ57; Lysine-specific histone demethylase 1 | Uniprot/SPTREMBL:B4F9F6; Lysine-specific histone demethylase 1Putative uncharacterized protein ; | UniGene:Zm.84880; LOC100191603 | RefSeq_peptide:NP_001130504; hypothetical protein LOC100191603 | RefSeq_dna:NM_001137032; LOC100191603 (p…
GRMZM2G048494	2:236620008-236626349	23.5575	24.6874	0.0675885		0.193958	0.73725	0.999071	no	C5X7A4_SORBI Putative uncharacterized protein Sb02g001060 n=1 (Sorghum bicolor) Exp=0; maizesequence.org: Uniprot/SPTREMBL:B7ZYJ0; Putative uncharacterized protein | UniGene:Zm.12663; Hypothetical protein LOC100279518 | RefSeq_peptide:NP_001145989; hypothetical protein LOC100279518 | RefSeq_dna:NM_001152517; hypothetical protein LOC100279518 (LOC100279518) mRNA | GO:0007155; cell adhesion | GO:00…
GRMZM2G148693	2:236669674-236679078	81.9028	85.3006	0.0586431		0.176384	0.75795	0.999071	no	Q41829_MAIZE MADS box protein n=7 (Panicoideae) Exp=3e-109; maizesequence.org: GO:0043123; positive regulation of I-kappaB kinase/NF-kappaB cascade | GO:0043565; sequence-specific DNA binding | RefSeq_dna:NM_001111863; MADS box protein (ZAP1) mRNA | RefSeq_peptide:NP_001105333; MADS box protein | Uniprot/SPTREMBL:B4F7S9; Putative uncharacterized protein | Uniprot/SPTREMBL:B6TDJ6; MADS-box transcr…
AC212859.3_FG007	2:26355671-26372838	5.15394	5.59813	0.119269		0.292994	0.61385	0.999071	no	C5YB39_SORBI Putative uncharacterized protein Sb06g034000 n=1 (Sorghum bicolor) Exp=0; maizesequence.org: GO:0005488; binding
GRMZM2G357972	2:26628757-26633078	4.56853	4.29678	-0.0884741		-0.229351	0.689	0.999071	no	C5YB47_SORBI Putative uncharacterized protein Sb06g034060 n=1 (Sorghum bicolor) Exp=0; maizesequence.org: Uniprot/SPTREMBL:B4FXV3; Putative uncharacterized protein | UniGene:Zm.34095; Clone 997088 mRNA sequence | UniGene:Zm.12993; LOC100273862 | RefSeq_peptide:NP_001141731; hypothetical protein LOC100273862 | RefSeq_dna:NM_001148259; LOC100273862 (sdg107) mRNA | GO:0018024; histone-lysine N-methy…
GRMZM2G102471	2:2808176-2811018	469.345	438.797	-0.0970951		-0.253148	0.65365	0.999071	no	B9HDK6_POPTR Ubiquitin carrier protein n=1 (Populus trichocarpa) Exp=5e-82; maizesequence.org: Uniprot/SPTREMBL:B6T3C4; Ubiquitin carrier protein (EC 6.3.2.-) | Uniprot/SPTREMBL:B6SZE0; Ubiquitin carrier protein (EC 6.3.2.-) | UniGene:Zm.97432; Transcribed locus moderately similar to NP_564828.1 ubiquitin-conjugating enzyme putative [Arabidopsis thaliana] | UniGene:Zm.94406; Transcribed locus str…
GRMZM2G032694	2:29564493-29569213	7.81647	8.1242	0.0557085		0.154888	0.78275	0.999071	no	C0HHQ8_MAIZE Putative uncharacterized protein n=2 (Zea mays) Exp=0; maizesequence.org: Uniprot/SPTREMBL:C0PGQ7; Putative uncharacterized protein | UniGene:Zm.82819; Hypothetical protein LOC100383522 | RefSeq_peptide:NP_001169641; hypothetical protein LOC100383522 | RefSeq_dna:NM_001176170; hypothetical protein LOC100383522 (LOC100383522) mRNA | GO:0006468; protein amino acid phosphorylation | GO:…
GRMZM2G352129	2:31534331-31539953	63.762	67.2791	0.0774615		0.229356	0.6845	0.999071	no	B6U4M0_MAIZE Polyadenylate-binding protein 2 n=2 (Andropogoneae) Exp=0; maizesequence.org: Uniprot/SPTREMBL:B6U4M0; Polyadenylate-binding protein 2 | Uniprot/SPTREMBL:B4FPM9; Putative uncharacterized protein | UniGene:Zm.87253; LOC100285420 | RefSeq_peptide:NP_001151785; LOC100285420 | RefSeq_dna:NM_001158313; LOC100285420 (AY103944) mRNA | GO:0003723; RNA binding | GO:0003676; nucleic acid bindi…
GRMZM2G095598	2:33216133-33217640	211.061	179.566	-0.233146		-0.663978	0.2443	0.870325	no	C5YBH3_SORBI Putative uncharacterized protein Sb06g021480 n=1 (Sorghum bicolor) Exp=1e-109; maizesequence.org: UniGene:Zm.24658; TSA: Zea mays contig15706 mRNA sequence | UniGene:Zm.121976; Transcribed locus strongly similar to XP_002446734.1 hypothetical protein SORBIDRAFT_06g021480 [Sorghum bicolor] | GO:0008270; zinc ion binding | GO:0005622; intracellular
GRMZM2G135018	2:33468170-33478528	0.0901157	0.0730589	-0.302718		0	1	1	no	B6TW19_MAIZE MADS-box transcription factor 31 n=3 (Andropogoneae) Exp=1e-130; maizesequence.org: GO:0043565; sequence-specific DNA binding | GO:0006355; regulation of transcription DNA-dependent | GO:0005634; nucleus | GO:0003700; transcription factor activity
GRMZM2G021560	2:35890310-35900628	3.16726	2.92327	-0.115652		-0.164276	0.7755	0.999071	no	Q7XUF1_ORYSJ Os04g0488400 protein n=5 (Poaceae) Exp=9e-86; maizesequence.org: Uniprot/SPTREMBL:A8WET2; ZCN25 | UniGene:Zm.103117; ZCN25 protein | RefSeq_peptide:NP_001106257; ZCN25 protein | RefSeq_dna:NM_001112786; ZCN25 protein (ZCN25) mRNA | GenBank:EU241936; product:ZCN25 | EntrezGene:100127530; ZCN25 protein
GRMZM2G045005	2:38044186-38048031	11.4247	7.78478	-0.553428		-1.56226	0.0073	0.140941	no	Q6KF70_MAIZE Transglutaminase n=1 (Zea mays) Exp=8e-109; maizesequence.org: Uniprot/SPTREMBL:Q6KC84; Transglutaminase Fragment (EC 2.3.2.13) | Uniprot/SPTREMBL:B8A2N4; Putative uncharacterized protein | UniGene:Zm.86649; Transglutaminase | MaizeGDB_GenBank:AJ421525; product:transglutaminase | GO:0050826; response to freezing | GO:0050825; ice binding | GO:0042309; homoiothermy | GO:0016021; integ…
GRMZM2G032905	2:42381830-42389036	0.49839	0.385289	-0.371334		-0.221289	0.51375	0.999071	no	UPI0000DD90FB Os04g0461300 n=1 (Oryza sativa subsp. japonica) Exp=1e-38; maizesequence.org: UniGene:Zm.131791; Clone 1706117 mRNA sequence | GO:0043565; sequence-specific DNA binding | GO:0006355; regulation of transcription DNA-dependent | GO:0005634; nucleus | GO:0003700; transcription factor activity
GRMZM2G049549	2:44186480-44190062	47.8674	45.581	-0.0706109		-0.215743	0.7091	0.999071	no	B8A2L5_MAIZE Putative uncharacterized protein n=1 (Zea mays) Exp=0; maizesequence.org: Uniprot/SPTREMBL:C4J5V6; Putative uncharacterized protein | Uniprot/SPTREMBL:B8A2L5; Putative uncharacterized protein | Uniprot/SPTREMBL:B4FHJ0; Putative uncharacterized protein | UniGene:Zm.23913; Hypothetical protein LOC100194126 | RefSeq_peptide:NP_001132651; hypothetical protein LOC100194126 | RefSeq_dna:NM…
GRMZM2G420280	2:51272701-51274207	0.337319	0.151801	-1.15193		-1.22964	0.04505	0.423135	no	C5Y8R5_SORBI Putative uncharacterized protein Sb06g017210 n=1 (Sorghum bicolor) Exp=9e-95
GRMZM2G147619	2:52449214-52456233	10.1902	9.92796	-0.0376132		-0.106888	0.85385	0.999071	no	Q8L819_MAIZE SET domain-containing protein SET102 n=2 (Andropogoneae) Exp=0; maizesequence.org: Uniprot/SPTREMBL:C0PCG6; Putative uncharacterized protein
GRMZM2G174784	2:5520017-5524385	9.44876	6.11373	-0.628072		-1.73392	0.003	0.0748707	no	C5Y928_SORBI Putative uncharacterized protein Sb06g030670 n=2 (Andropogoneae) Exp=5e-125; maizesequence.org: Uniprot/SPTREMBL:C0HEY4; Putative uncharacterized protein | Uniprot/SPTREMBL:B8A3P6; Putative uncharacterized protein | UniGene:Zm.96693; TSA: Zea mays contig10716 mRNA sequence | UniGene:Zm.24062; Hypothetical protein LOC100280414 | RefSeq_peptide:NP_001146809; hypothetical protein LOC100…
GRMZM2G075081	2:58373991-58376007	0.0330421	0.0773906	1.22785		0	1	1	no	A8WER6_MAIZE ZCN4 n=5 (Andropogoneae) Exp=4e-88; maizesequence.org: Uniprot/SPTREMBL:B6T3R1; RCN4-Corn Centroradialis/TFL1-like protein | Uniprot/SPTREMBL:A8WER6; ZCN4 | RefSeq_peptide:NP_001106243; ZCN4 protein | RefSeq_dna:NM_001112772; ZCN4 protein (ZCN4) mRNA | GenBank:EU241920; product:ZCN4 | EntrezGene:100127515; ZCN4 protein
GRMZM2G001289	2:8289422-8295765	2.71892	2.41884	-0.168718		-0.406106	0.4883	0.999071	no	C5YGI2_SORBI Putative uncharacterized protein Sb06g029270 n=1 (Sorghum bicolor) Exp=0; maizesequence.org: Uniprot/SPTREMBL:B8A225; Putative uncharacterized protein | GO:0043565; sequence-specific DNA binding | GO:0030528; transcription regulator activity | GO:0006355; regulation of transcription DNA-dependent | GO:0005634; nucleus | GO:0003700; transcription factor activity
GRMZM2G450273	2:89405466-89406212	26.2709	23.6572	-0.151186		-0.399469	0.4911	0.999071	no	B6SXE5_MAIZE Flowering promoting factor-like 1 n=2 (Andropogoneae) Exp=3e-39; maizesequence.org: Uniprot/SPTREMBL:B6SXE5; Flowering promoting factor-like 1 | UniGene:Zm.32857; Flowering promoting factor-like 1 | RefSeq_peptide:NP_001148034; flowering promoting factor-like 1 | RefSeq_dna:NM_001154562; flowering promoting factor-like 1 (LOC100281643) mRNA | EntrezGene:100281643; flowering promoting…
GRMZM2G000052	2:8996164-9001551	19.3807	21.3628	0.14048		0.411593	0.47055	0.999071	no	Q7X809_ORYSJ Os04g0623300 protein n=5 (Poaceae) Exp=0; maizesequence.org: GO:0055114; oxidation reduction | GO:0009055; electron carrier activity | GO:0016491; oxidoreductase activity
GRMZM2G080054	2:9449187-9452420	17.1935	16.1251	-0.0925551		-0.253622	0.658	0.999071	no	B6SIB8_MAIZE Protein SPATULA n=3 (Andropogoneae) Exp=2e-93; maizesequence.org: Uniprot/SPTREMBL:B6SNH3; Protein SPATULA | Uniprot/SPTREMBL:B6SIB8; Protein SPATULA | UniGene:Zm.15974; Protein SPATULA | UniGene:Zm.137194; Transcribed locus strongly similar to NP_001146943.1 protein SPATULA [Zea mays] | RefSeq_peptide:NP_001147257; protein SPATULA | RefSeq_peptide:NP_001146943; protein SPATULA | Ref…
GRMZM2G008123	3:106966138-106972712	8.61452	8.83912	0.0371323		0.0840469	0.87765	0.999071	no	B4FXK9_MAIZE Putative uncharacterized protein n=1 (Zea mays) Exp=2e-170; maizesequence.org: RefSeq_dna:NM_001148210; hypothetical protein LOC100273809 (LOC100273809) mRNA | RefSeq_peptide:NP_001141682; hypothetical protein LOC100273809 | UniGene:Zm.25309; Hypothetical protein LOC100273809 | Uniprot/SPTREMBL:B4FXK9; Putative uncharacterized proteinUbiquitin-protein ligase/ zinc ion binding protein…
GRMZM2G444621	3:118981073-118981990	0.616248	0.969243	0.653347		0.83135	0.1487	0.736328	no	B6SNK9_MAIZE Calmodulin n=2 (Andropogoneae) Exp=5e-81; maizesequence.org: Uniprot/SPTREMBL:B6TV65; Calmodulin | Uniprot/SPTREMBL:B6SNK9; CalmodulinPutative uncharacterized protein ; | UniGene:Zm.101337; Transcribed locus strongly similar to NP_001146794.1 hypothetical protein LOC100280399 [Zea mays] | RefSeq_peptide:NP_001146794; hypothetical protein LOC100280399 | RefSeq_dna:NM_001153322; LOC100…
GRMZM2G178102	3:123281941-123288759	0.501108	0.808046	0.689316		1.16563	0.0475	0.434121	no	C5YRY3_SORBI Putative uncharacterized protein Sb08g021350 n=3 (Andropogoneae) Exp=0; maizesequence.org: Uniprot/SPTREMBL:C0PGR4; Putative uncharacterized protein | Uniprot/SPTREMBL:B4G1Z6; Putative uncharacterized protein | UniGene:Zm.31413; Hypothetical protein LOC100274567 | RefSeq_peptide:NP_001142394; hypothetical protein LOC100274567 | RefSeq_dna:NM_001148922; hypothetical protein LOC1002745…
GRMZM2G176063	3:126327929-126330315	0.00894233	0.0151944	0.764817		0	1	1	no	C5YPZ2_SORBI Putative uncharacterized protein Sb08g018760 n=2 (Andropogoneae) Exp=4e-73; maizesequence.org: UniGene:Zm.98910; Transcribed locus strongly similar to XP_002442354.1 hypothetical protein SORBIDRAFT_08g018760 [Sorghum bicolor] | GO:0050826; response to freezing | GO:0050825; ice binding | GO:0045449; regulation of transcription | GO:0042309; homoiothermy | GO:0008270; zinc ion binding…
GRMZM2G155375	3:132931960-132944768	4.30627	3.56486	-0.272593		-0.633483	0.27625	0.900071	no	B4FP27_MAIZE Putative uncharacterized protein n=1 (Zea mays) Exp=1e-149; maizesequence.org: GO:0005515; protein binding
GRMZM2G087804	3:1464298-1469099	112.838	98.1533	-0.201144		-0.504955	0.37865	0.966904	no	B6SVM7_MAIZE Transcription factor ZmGLK1 n=3 (Zea mays) Exp=0
GRMZM2G082387	3:150866876-150873771	27.897	30.3788	0.122955		0.369552	0.5265	0.999071	no	B6SV05_MAIZE GRAS family transcription factor containing protein n=2 (Andropogoneae) Exp=0; maizesequence.org: Uniprot/SPTREMBL:B6SV05; GRAS family transcription factor containing protein | UniGene:Zm.33636; GRAS family transcription factor containing protein | RefSeq_peptide:NP_001147776; GRAS family transcription factor containing protein | RefSeq_dna:NM_001154304; GRAS family transcription fac…
GRMZM2G473152	3:154450607-154451831	0.248699	0.17199	-0.532076		-0.557387	0.3341	0.942562	no	C5XH51_SORBI Putative uncharacterized protein Sb03g045150 n=1 (Sorghum bicolor) Exp=8e-53; maizesequence.org: UniGene:Zm.133751; Clone 342117 mRNA sequence | GO:0043565; sequence-specific DNA binding | GO:0006355; regulation of transcription DNA-dependent | GO:0005634; nucleus | GO:0005622; intracellular | GO:0003677; DNA binding
GRMZM2G019686	3:155132783-155133636	4.51616	5.08833	0.172096		0.314938	0.5856	0.999071	no	B6TP05_MAIZE FLP1 n=2 (Andropogoneae) Exp=1e-53; maizesequence.org: EntrezGene:100284002; LOC100284002 | RefSeq_dna:NM_001156900; LOC100284002 (cl18204_1) mRNA | RefSeq_peptide:NP_001150372; LOC100284002 | Uniprot/SPTREMBL:B6TP05; FLP1Putative uncharacterized protein ;
GRMZM2G445261	3:15724893-15726447	0.0879523	0.0416795	-1.07738		0	1	1	no	C5XPB0_SORBI Putative uncharacterized protein Sb03g005590 n=1 (Sorghum bicolor) Exp=1e-63; maizesequence.org: GO:0016787; hydrolase activity | GO:0008152; metabolic process
GRMZM2G065471	3:15871856-15873164	0.914066	0.759927	-0.266438		-0.382131	0.51835	0.999071	no	C5XPB0_SORBI Putative uncharacterized protein Sb03g005590 n=1 (Sorghum bicolor) Exp=1e-112; maizesequence.org: GO:0008152; metabolic process | GO:0016787; hydrolase activity
GRMZM2G309063	3:1615719-1633696	19.6486	21.4946	0.129548		0.355331	0.53545	0.999071	no	B3F0L1_MAIZE SINA1 n=4 (Andropogoneae) Exp=5e-173; maizesequence.org: RefSeq_peptide:NP_001123595; LOC100170242 | UniGene:Zm.150479; TSA: Zea mays contig11968 mRNA sequence | UniGene:Zm.155138; TSA: Zea mays contig30654 mRNA sequence | Uniprot/SPTREMBL:B3F0L1; SINA1 | Uniprot/SPTREMBL:B4FNW4; Putative uncharacterized protein | Uniprot/SPTREMBL:B6UEL6; Ubiquitin ligase SINAT3 | RefSeq_dna:NM_00113…
GRMZM2G110153	3:171471053-171473646	4.12384	4.61104	0.161104		0.352879	0.53245	0.999071	no	MADS2_ORYSJ MADS-box transcription factor 2 n=5 (Poaceae) Exp=7e-108; maizesequence.org: Uniprot/SPTREMBL:Q9AR51; Putative MADS-domain transcription factorPutative uncharacterized protein ; | UniGene:Zm.335; Zea mays MADS16 | RefSeq_peptide:NP_001105136; MADS16 | RefSeq_dna:NM_001111666; Zea mays MADS16 (zmm16) mRNA | MaizeGDB_GenBank:AJ292959; product:putative MADS-domain transcription factor | …
GRMZM2G053284	3:175942134-175945293	10.0503	7.52792	-0.416915		-1.11513	0.0526	0.457859	no	ACT12_ARATH Actin-12 n=187 (Eukaryota) Exp=0; maizesequence.org: UniGene:Zm.155349; TSA: Zea mays contig55950 mRNA sequence | UniGene:Zm.82201; Hypothetical protein LOC100273396 | Uniprot/SPTREMBL:B4FV86; Putative uncharacterized protein | Uniprot/SPTREMBL:B6SZ83; Actin-7Putative uncharacterized protein ; | Uniprot/SPTREMBL:P93634; Actin Fragment | Uniprot/SPTREMBL:P93638; Actin Fragment | UniGen…
GRMZM2G154641	3:179564865-179569669	20.9517	16.2589	-0.365838		-1.01053	0.08265	0.568974	no	C5XPT0_SORBI Putative uncharacterized protein Sb03g039840 n=1 (Sorghum bicolor) Exp=0; maizesequence.org: Uniprot/SPTREMBL:C4JB17; Putative uncharacterized protein | UniGene:Zm.1042; Full-length cDNA clone ZM_BFb0354L21 | GO:0043565; sequence-specific DNA binding | GO:0030528; transcription regulator activity | GO:0006355; regulation of transcription DNA-dependent | GO:0005634; nucleus | GO:00037…
GRMZM2G074908	3:180310732-180312482	0.25	0.00803133	-4.96015		0	1	1	no	Q0JHT1_ORYSJ Os01g0844900 protein n=2 (Oryza sativa) Exp=1e-33
GRMZM2G165511	3:185362260-185366708	53.8981	56.418	0.0659211		0.175938	0.7607	0.999071	no	B9HDK6_POPTR Ubiquitin carrier protein n=1 (Populus trichocarpa) Exp=1e-81; maizesequence.org: Uniprot/SPTREMBL:B4FC97; Ubiquitin carrier protein (EC 6.3.2.-) | UniGene:Zm.92667; Transcribed locus strongly similar to NP_001044640.2 Os01g0819400 [Oryza sativa Japonica Group] | UniGene:Zm.155456; Transcribed locus strongly similar to NP_001044641.1 Os01g0819500 [Oryza sativa Japonica Group] | RefSe…
GRMZM2G451031	3:186781330-186784258	0.0231244	0.0242009	0.0656448		0	1	1	no	C5XN56_SORBI Putative uncharacterized protein Sb03g037750 n=1 (Sorghum bicolor) Exp=7e-122; maizesequence.org: GO:0003677; DNA binding | GO:0003700; transcription factor activity | GO:0006355; regulation of transcription DNA-dependent
GRMZM2G159134	3:186805865-186810898	43.0155	34.2605	-0.32831		-0.866127	0.1325	0.704487	no	C5XN55_SORBI Putative uncharacterized protein Sb03g037740 n=2 (Andropogoneae) Exp=4e-139
GRMZM2G139688	3:187060496-187064561	2.82388	3.83182	0.440351		1.05231	0.0693	0.526703	no	C5XN47_SORBI Putative uncharacterized protein Sb03g037680 n=2 (Andropogoneae) Exp=0; maizesequence.org: Uniprot/SPTREMBL:B4F9Y7; Putative uncharacterized proteinTranscription factor GAMYB ; | UniGene:Zm.24997; Hypothetical protein LOC100191731 | RefSeq_peptide:NP_001130632; hypothetical protein LOC100191731 | RefSeq_dna:NM_001137160; hypothetical protein LOC100191731 (LOC100191731) mRNA | GO:0003…
GRMZM2G139710	3:187086657-187091886	7.53953	9.72787	0.367649		1.07356	0.06115	0.494932	no	Q8H6B0_MAIZE Putative uncharacterized protein n=1 (Zea mays) Exp=0; maizesequence.org: RefSeq_dna:NM_001111633; LOC541980 (sdg113) mRNA | RefSeq_peptide:NP_001105103; LOC541980 | UniGene:Zm.104576; Transcribed locus | UniGene:Zm.12718; LOC541980 | Uniprot/SPTREMBL:Q8H6B0; Putative uncharacterized proteinSET domain protein 113 ; | GO:0018024; histone-lysine N-methyltransferase activity | GO:001656…
GRMZM2G386276	3:189749773-189754836	0.00932831	0.00778101	-0.261658		0	1	1	no	C5XMC4_SORBI Putative uncharacterized protein Sb03g036820 n=1 (Sorghum bicolor) Exp=0; maizesequence.org: GO:0043565; sequence-specific DNA binding | GO:0030528; transcription regulator activity | GO:0006355; regulation of transcription DNA-dependent | GO:0005634; nucleus | GO:0003700; transcription factor activity
GRMZM2G394973	3:195990511-195991615	0.0158994	0.0571616	1.84607		0	1	1	no	C5XKS3_SORBI Putative uncharacterized protein Sb03g035080 n=1 (Sorghum bicolor) Exp=3e-31; maizesequence.org: UniGene:Zm.148384; TSA: Zea mays contig21936 mRNA sequence | GO:0045449; regulation of transcription | GO:0008270; zinc ion binding | GO:0003677; DNA binding
GRMZM2G103666	3:197706352-197708239	17.704	22.8539	0.368365		0.990335	0.08655	0.580522	no	A8WES4_MAIZE ZCN12 n=2 (Andropogoneae) Exp=1e-99; maizesequence.org: Uniprot/SPTREMBL:A8WES4; ZCN12 | UniGene:Zm.103217; LOC100127522 | RefSeq_peptide:NP_001106250; LOC100127522 | RefSeq_dna:NM_001112779; LOC100127522 (gpm811) mRNA | GenBank:EU241928; product:ZCN12 | EntrezGene:100127522; LOC100127522
GRMZM2G079727	3:201371177-201376485	2.53877	1.27631	-0.992151		-1.92651	0.00135	0.041936	yes	B8A0R1_MAIZE Putative uncharacterized protein n=1 (Zea mays) Exp=1e-127; maizesequence.org: Uniprot/SPTREMBL:B8A0R1; Putative uncharacterized protein | UniGene:Zm.103325; Transcribed locus strongly similar to NP_001146353.1 hypothetical protein LOC100279931 [Zea mays] | UniGene:Zm.101916; Hypothetical protein LOC100279931 | RefSeq_peptide:NP_001146353; hypothetical protein LOC100279931 | RefSeq_d…
GRMZM2G079904	3:201394834-201403066	51.2819	53.8473	0.0704243		0.205731	0.7139	0.999071	no	C5XIF4_SORBI Putative uncharacterized protein Sb03g033340 n=1 (Sorghum bicolor) Exp=0; maizesequence.org: UniGene:Zm.94997; Transcribed locus strongly similar to NP_001044115.1 Os01g0725800 [Oryza sativa (japonica cultivar-group)] | UniGene:Zm.153941; TSA: Zea mays contig35816 mRNA sequence
GRMZM2G035994	3:203965360-203967079	0.869409	0.627127	-0.471277		-0.718988	0.20675	0.827774	no	C0PE40_MAIZE Putative uncharacterized protein n=1 (Zea mays) Exp=0; maizesequence.org: Uniprot/SPTREMBL:C0PE40; Putative uncharacterized protein | UniGene:Zm.36744; Hypothetical protein LOC100383200 | RefSeq_peptide:NP_001169333; hypothetical protein LOC100383200 | RefSeq_dna:NM_001175862; hypothetical protein LOC100383200 (LOC100383200) mRNA | EntrezGene:100383200; hypothetical protein LOC100383…
GRMZM2G137965	3:204143322-204150370	16.8949	15.004	-0.171241		-0.515974	0.3649	0.95888	no	B6TD89_MAIZE WD-40 repeat protein MSI4 n=1 (Zea mays) Exp=0; maizesequence.org: Uniprot/SPTREMBL:Q8L8G4; Nucleosome/chromatin assembly factor group CPutative uncharacterized protein ; | Uniprot/SPTREMBL:B6TD89; WD-40 repeat protein MSI4 | RefSeq_peptide:NP_001105191; nucleosome/chromatin assembly factor group C | RefSeq_dna:NM_001111721; nucleosome/chromatin assembly factor group C (nfc101) mRNA …
GRMZM2G466139	3:206391108-206414447	25.0397	21.2789	-0.234794		-0.362904	0.5179	0.999071	no	C5XHH0_SORBI Putative uncharacterized protein Sb03g031920 n=1 (Sorghum bicolor) Exp=0; maizesequence.org: UniGene:Zm.138291; LOC100277716 | UniGene:Zm.2901; TSA: Zea mays contig28121 mRNA sequence
GRMZM2G169654	3:206678254-206680041	32.6712	52.7314	0.690643		2.10604	0.0003	0.0128713	yes	B6TX04_MAIZE DNA-binding protein RAV1 n=1 (Zea mays) Exp=5e-137; maizesequence.org: Uniprot/SPTREMBL:B6TX04; DNA-binding protein RAV1 | UniGene:Zm.84705; DNA-binding protein RAV1 | RefSeq_peptide:NP_001151105; DNA-binding protein RAV1 | RefSeq_dna:NM_001157633; DNA-binding protein RAV1 (LOC100284738) mRNA | GO:0050826; response to freezing | GO:0050825; ice binding | GO:0042309; homoiothermy | GO…
GRMZM2G327189	3:209919637-209921256	3.19389	3.09063	-0.0474137		-0.0845047	0.8858	0.999071	no	B6UIM6_MAIZE Putative uncharacterized protein n=1 (Zea mays) Exp=3e-35; maizesequence.org: GO:0008270; zinc ion binding | GO:0045449; regulation of transcription | RefSeq_dna:NM_001152200; LOC100279174 (IDP472) mRNA | RefSeq_dna:NM_001174396; hypothetical protein LOC100381571 (LOC100381571) mRNA | RefSeq_peptide:NP_001145672; hypothetical protein LOC100279174 | RefSeq_peptide:NP_001167867; hypoth…
GRMZM2G069018	3:210131672-210135228	22.7121	19.456	-0.223246		-0.665823	0.2536	0.876758	no	B4FDK3_MAIZE Fiber protein Fb2 n=4 (Andropogoneae) Exp=2e-82
GRMZM2G429955	3:223492970-223493998	0.140122	0.0844146	-0.731119		0	1	1	no	CB48_MAIZE Chlorophyll a-b binding protein 48, chloroplastic n=3 (Zea mays) Exp=2e-49; maizesequence.org: UniGene:Zm.77645; Chlorophyll a-b binding protein 2 | RefSeq_dna:NM_001154967; chlorophyll a-b binding protein 2 (LOC100282054) mRNA
GRMZM2G365688	3:223690796-223697299	15.6771	14.5494	-0.107699		-0.300711	0.5984	0.999071	no	B6SVD1_MAIZE Two-component response regulator-like PRR1 n=2 (Andropogoneae) Exp=2e-154
GRMZM2G365688	3:223690796-223697299	15.6771	14.5494	-0.107699		-0.300711	0.5984	0.999071	no	B6SVD1_MAIZE Two-component response regulator-like PRR1 n=2 (Andropogoneae) Exp=2e-154
GRMZM2G072052	3:223776105-223777096	0.605329	0.923146	0.608839		0.804155	0.174	0.779119	no	C0HHV7_MAIZE Putative uncharacterized protein n=1 (Zea mays) Exp=8e-77; maizesequence.org: Uniprot/SPTREMBL:C0HHV7; Putative uncharacterized protein | UniGene:Zm.11997; Hypothetical protein LOC100381663 | RefSeq_peptide:NP_001167949; hypothetical protein LOC100381663 | RefSeq_dna:NM_001174478; hypothetical protein LOC100381663 (LOC100381663) mRNA | GO:0005509; calcium ion binding | EntrezGene:100…
GRMZM2G157605	3:223832312-223835666	0.77922	0.933808	0.261095		0.432663	0.45155	0.997011	no	B6UES9_MAIZE Ubiquitin carrier protein n=1 (Zea mays) Exp=0; maizesequence.org: Uniprot/SPTREMBL:C0HEN2; Putative uncharacterized protein | Uniprot/SPTREMBL:B6UES9; Ubiquitin carrier protein (EC 6.3.2.-) | UniGene:Zm.28167; LOC100286132 | RefSeq_peptide:NP_001152492; LOC100286132 | RefSeq_dna:NM_001159020; LOC100286132 (si946044e03) mRNA | GO:0051246; regulation of protein metabolic process | GO:…
GRMZM2G152688	3:230988546-230993854	32.9694	30.0707	-0.132769		-0.413238	0.46365	0.999071	no	B4G1W8_MAIZE Myosin-like protein n=2 (Zea mays) Exp=9e-178; maizesequence.org: Uniprot/SPTREMBL:B6TE01; Myosin-like protein | Uniprot/SPTREMBL:B4G1W8; Myosin-like proteinPutative uncharacterized protein ; | UniGene:Zm.96122; LOC100283029 | RefSeq_peptide:NP_001149403; LOC100283029 | RefSeq_dna:NM_001155931; LOC100283029 (cl30719_1) mRNA | GO:0016192; vesicle-mediated transport | GO:0016020; membr…
GRMZM2G092008	3:231196827-231205880	4.5721	5.30587	0.214732		0.225643	0.6431	0.999071	no	Q53Q71_ORYSJ CEN-like protein 2, putative, expressed n=13 (Poaceae) Exp=1e-93; maizesequence.org: UniGene:Zm.72510; LOC100037785 | Uniprot/SPTREMBL:A8WER3; ZCN1 | Uniprot/SPTREMBL:A8WER5; ZCN3 | Uniprot/SPTREMBL:A9LLX7; ZCN3 | Uniprot/SPTREMBL:Q005X8; Terminal flower 1 | Uniprot/SPTREMBL:Q2LGH3; CEN-like protein Fragment | RefSeq_peptide:NP_001106242; ZCN3 protein | RefSeq_peptide:NP_001105959; L…
GRMZM2G061758	3:25124313-25125954	0.25	0.0161395	-3.95326		0	1	1	no	B6TVG9_MAIZE Ubiquitin-protein ligase/ zinc ion binding protein n=3 (Zea mays) Exp=7e-140; maizesequence.org: Uniprot/SPTREMBL:B8A2F9; Putative uncharacterized protein | Uniprot/SPTREMBL:B6TVG9; Ubiquitin-protein ligase/ zinc ion binding protein | Uniprot/SPTREMBL:B6TLQ5; Putative uncharacterized proteinUbiquitin-protein ligase/ zinc ion binding protein ; | RefSeq_peptide:NP_001150969; ubiquitin-…
GRMZM2G026643	3:27552060-27559751	29.8847	25.285	-0.241125		-0.749401	0.19365	0.811555	no	Q4R0U0_MAIZE Homeobox protein OCL1 n=4 (Andropogoneae) Exp=0; maizesequence.org: GO:0043565; sequence-specific DNA binding | GO:0030528; transcription regulator activity | GO:0006355; regulation of transcription DNA-dependent | GO:0005634; nucleus | GO:0004879; ligand-dependent nuclear receptor activity | GO:0003700; transcription factor activity | GO:0003677; DNA binding
GRMZM2G057150	3:30234359-30239339	47.0595	48.4615	0.0423531		0.124412	0.82585	0.999071	no	Q0JRD5_ORYSJ Os01g0106800 protein n=6 (Poaceae) Exp=2e-56; maizesequence.org: GO:0005515; protein binding | GO:0008270; zinc ion binding
GRMZM2G085266	3:3200657-3210938	41.2034	27.4825	-0.58425		-1.65671	0.0051	0.10966	no	C5XKF7_SORBI Putative uncharacterized protein Sb03g001640 n=1 (Sorghum bicolor) Exp=0; maizesequence.org: UniGene:Zm.18935; Transcribed locus strongly similar to XP_002454931.1 hypothetical protein SORBIDRAFT_03g001640 [Sorghum bicolor] | UniGene:Zm.154463; TSA: Zea mays contig33479 mRNA sequence | GO:0008270; zinc ion binding | GO:0005515; protein binding
GRMZM2G067511	3:38428314-38432905	50.7101	53.6056	0.0801106		0.24662	0.6637	0.999071	no	UPI0000DD8A7A Os01g0267900 n=1 (Oryza sativa subsp. japonica) Exp=6e-80; maizesequence.org: Uniprot/SPTREMBL:Q43699; CalmodulinPutative uncharacterized protein ; | Uniprot/SPTREMBL:B6T376; Calmodulin | Uniprot/SPTREMBL:B6T1V6; Calmodulin | RefSeq_peptide:NP_001105547; calmodulin2 | RefSeq_dna:NM_001112077; calmodulin2 (cal2) mRNA | GO:0005509; calcium ion binding | EntrezGene:542533; calmodulin2
GRMZM2G089949	3:40521476-40522945	4.50578	4.08324	-0.142063		-0.312913	0.5723	0.999071	no	B6SY12_MAIZE Putative uncharacterized protein n=1 (Zea mays) Exp=0; maizesequence.org: Uniprot/SPTREMBL:B6SY12; Putative uncharacterized protein | UniGene:Zm.128918; Hypothetical protein LOC100275712 | RefSeq_peptide:NP_001143209; hypothetical protein LOC100275712 | RefSeq_dna:NM_001149737; hypothetical protein LOC100275712 (LOC100275712) mRNA | GO:0045449; regulation of transcription | GO:000827…
GRMZM2G471089	3:4861538-4871638	40.1493	39.0479	-0.0401299		-0.120351	0.833	0.999071	no	Q84V75_MAIZE M23 protein (Fragment) n=2 (Zea mays) Exp=5e-76; maizesequence.org: GO:0006355; regulation of transcription DNA-dependent | GO:0005634; nucleus | GO:0003700; transcription factor activity
GRMZM2G133646	3:50944446-50952220	11.0329	9.68308	-0.188274		-0.563813	0.3222	0.934078	no	SPL1_ORYSJ Squamosa promoter-binding-like protein 1 n=3 (Oryza sativa) Exp=0; maizesequence.org: GO:0003677; DNA binding | GO:0005634; nucleus
GRMZM2G111593	3:53144188-53151462	0.94015	0.621691	-0.596693		-0.832718	0.15475	0.744302	no	B6SVL3_MAIZE Kelch motif family protein n=5 (Andropogoneae) Exp=2e-166; maizesequence.org: GO:0005515; protein binding
GRMZM2G434506	3:55367302-55375064	2.44841	1.62427	-0.592054		-0.850488	0.14595	0.731381	no	B6SGL8_MAIZE Fb2 n=3 (Zea mays) Exp=4e-73
GRMZM2G088653	3:66185669-66189796	7.46375	8.3059	0.154236		0.387049	0.5082	0.999071	no	B6U6F6_MAIZE SUMO protease n=2 (Zea mays) Exp=0; maizesequence.org: Uniprot/SPTREMBL:C0HDT6; Putative uncharacterized protein | Uniprot/SPTREMBL:B6U6F6; SUMO protease | GO:0008234; cysteine-type peptidase activity | GO:0006508; proteolysis
GRMZM2G001426	3:69955113-69957195	0.842238	0.887899	0.0761676		0.122096	0.83415	0.999071	no	C5XF60_SORBI Putative uncharacterized protein Sb03g029470 n=1 (Sorghum bicolor) Exp=6e-164; maizesequence.org: RefSeq_dna:NM_001177117; hypothetical protein LOC100384621 (LOC100384621) mRNA | UniGene:Zm.83039; Hypothetical protein LOC100384621
GRMZM5G844173	3:9306075-9317285	56.0071	59.3055	0.0825562		0.213362	0.7168	0.999071	no	No significant hits (1e-5); maizesequence.org: Uniprot/SPTREMBL:B4FQT9; Putative uncharacterized protein | Uniprot/SPTREMBL:B1NW89; Gigantea1B Fragment | Uniprot/SPTREMBL:B1H3M1; Gigantea 1B | UniGene:Zm.117501; Hypothetical protein LOC100272803 | UniGene:Zm.117456; Gigantea like1B | RefSeq_peptide:NP_001140728; hypothetical protein LOC100272803 | RefSeq_dna:NM_001147256; hypothetical protein LOC…
GRMZM2G377079	3:96134843-96137556	2.82538	2.94346	0.0590681		0.106422	0.8577	0.999071	no	C5YTS3_SORBI Putative uncharacterized protein Sb08g007190 n=1 (Sorghum bicolor) Exp=7e-103; maizesequence.org: GO:0008270; zinc ion binding | GO:0005515; protein binding
AC198403.3_FG001	4:10908007-10908646	0.258885	0.816623	1.65736		1.56383	0.0126	0.199832	no	B6U616_MAIZE CBF-like protein n=1 (Zea mays) Exp=1e-93; maizesequence.org: Uniprot/SPTREMBL:B6U616; CBF-like protein | UniGene:Zm.132316; CBF-like protein | RefSeq_peptide:NP_001151893; CBF-like protein | RefSeq_dna:NM_001158421; CBF-like protein (LOC100285530) mRNA | GO:0006355; regulation of transcription DNA-dependent | GO:0003700; transcription factor activity | GO:0003677; DNA binding | Entr…
GRMZM2G060464	4:121191322-121193989	7.7172	6.21695	-0.311871		-0.694937	0.23055	0.855047	no	B4FLD7_MAIZE Nucleoside diphosphate kinase n=1 (Zea mays) Exp=4e-100; maizesequence.org: Uniprot/SPTREMBL:B4FLD7; Nucleoside diphosphate kinase (EC 2.7.4.6) | UniGene:Zm.19303; Nucleoside diphosphate kinase | RefSeq_peptide:NP_001148550; nucleoside diphosphate kinase | RefSeq_dna:NM_001155078; nucleoside diphosphate kinase (LOC100282166) mRNA | GO:0006241; CTP biosynthetic process | GO:0006228; U…
GRMZM2G055782	4:126011253-126012505	0.137863	0.201993	0.55107		0	1	1	no	Q84KZ4_MAIZE MADS-box transcription factor MADS2 n=2 (Zea mays) Exp=5e-41; maizesequence.org: GO:0003700; transcription factor activity | GO:0005634; nucleus | GO:0006355; regulation of transcription DNA-dependent | GO:0043565; sequence-specific DNA binding
GRMZM2G019335	4:134046086-134047565	123.882	114.443	-0.114337		-0.340052	0.5527	0.999071	no	B6TXF7_MAIZE Salt tolerance-like protein n=4 (Andropogoneae) Exp=1e-104; maizesequence.org: Uniprot/SPTREMBL:B4FXI0; Putative uncharacterized proteinSalt tolerance-like protein ; | RefSeq_peptide:NP_001141667; hypothetical protein LOC100273793 | RefSeq_dna:NM_001148195; hypothetical protein LOC100273793 (LOC100273793) mRNA | GO:0008270; zinc ion binding | GO:0005622; intracellular | EntrezGene:10…
GRMZM2G067019	4:136097690-136128712	1.60999	1.67217	0.0546698		0.106093	0.8486	0.999071	no	C4J9R4_MAIZE Putative uncharacterized protein n=1 (Zea mays) Exp=1e-101; maizesequence.org: Uniprot/SPTREMBL:B4FI87; Putative uncharacterized protein | RefSeq_peptide:NP_001132822; hypothetical protein LOC100194312 | RefSeq_dna:NM_001139350; hypothetical protein LOC100194312 (LOC100194312) mRNA | GO:0050826; response to freezing | GO:0050825; ice binding | GO:0042309; homoiothermy | GO:0008270; z…
GRMZM2G020081	4:140726568-140729617	0.625257	0.928239	0.570047		0.792038	0.16795	0.767834	no	B6SVD1_MAIZE Two-component response regulator-like PRR1 n=2 (Andropogoneae) Exp=0; maizesequence.org: Uniprot/SPTREMBL:C4J9K5; Putative uncharacterized protein | Uniprot/SPTREMBL:B6SVD1; Two-component response regulator-like PRR1 | UniGene:Zm.36181; LOC100281433 | RefSeq_peptide:NP_001147823; LOC100281433 | RefSeq_dna:NM_001154351; LOC100281433 (TIDP3407) mRNA | GO:0006355; regulation of transcri…
GRMZM2G162637	4:142180852-142188195	14.0477	15.3307	0.12609		0.365269	0.5202	0.999071	no	C5XXS5_SORBI Putative uncharacterized protein Sb04g026400 n=3 (Andropogoneae) Exp=0; maizesequence.org: GO:0004674; protein serine/threonine kinase activity | GO:0005524; ATP binding | GO:0006468; protein amino acid phosphorylation
GRMZM2G078077	4:145641627-145642678	0.18495	0.104131	-0.828736		0	1	1	no	B6TR65_MAIZE TCP-domain protein n=2 (Zea mays) Exp=5e-57; maizesequence.org: Uniprot/SPTREMBL:B6UI34; TCP-domain protein | Uniprot/SPTREMBL:B6TR65; TCP-domain protein | UniGene:Zm.129784; TCP-domain protein | RefSeq_peptide:NP_001150568; TCP-domain protein | RefSeq_dna:NM_001157096; TCP-domain protein (LOC100284201) mRNA | EntrezGene:100284201; TCP-domain protein
GRMZM2G001048	4:14748386-14751912	6.61946	7.3972	0.160266		0.435967	0.45175	0.997011	no	B4FB68_MAIZE Putative uncharacterized protein n=2 (Zea mays) Exp=0; maizesequence.org: Uniprot/SPTREMBL:C0PGW2; Putative uncharacterized protein | Uniprot/SPTREMBL:B6TXS3; Putative uncharacterized protein | Uniprot/SPTREMBL:B4FB68; Putative uncharacterized protein | UniGene:Zm.123575; Hypothetical protein LOC100192062 | UniGene:Zm.118453; Hypothetical protein LOC100277651 | RefSeq_peptide:NP_0011…
GRMZM2G048621	4:152103665-152104731	0.0248992	0.0406604	0.707525		0	1	1	no	B6TYW5_MAIZE Dehydration-responsive element-binding protein 1B n=1 (Zea mays) Exp=2e-88; maizesequence.org: Uniprot/SPTREMBL:B6TYW5; Dehydration-responsive element-binding protein 1B | UniGene:Zm.133642; Dehydration-responsive element-binding protein 1B | RefSeq_peptide:NP_001151300; dehydration-responsive element-binding protein 1B | RefSeq_dna:NM_001157828; dehydration-responsive element-bindin…
GRMZM2G072926	4:152189366-152190424	0.25	0.0161665	-3.95085		0	1	1	no	C5XRY4_SORBI Putative uncharacterized protein Sb04g032940 n=1 (Sorghum bicolor) Exp=3e-37; maizesequence.org: GO:0050826; response to freezing | GO:0050825; ice binding | GO:0042309; homoiothermy | GO:0006355; regulation of transcription DNA-dependent | GO:0003700; transcription factor activity | GO:0003677; DNA binding
GRMZM2G098800	4:153223583-153227388	3.08948	3.73065	0.272063		0.646277	0.2616	0.885548	no	B7ZX85_MAIZE Putative uncharacterized protein n=1 (Zea mays) Exp=0; maizesequence.org: EntrezGene:100279263; hypothetical protein LOC100279263 | RefSeq_dna:NM_001152284; hypothetical protein LOC100279263 (LOC100279263) mRNA | RefSeq_peptide:NP_001145756; hypothetical protein LOC100279263 | UniGene:Zm.83614; Hypothetical protein LOC100279263 | Uniprot/SPTREMBL:B7ZX85; Putative uncharacterized prot…
GRMZM2G084791	4:154875608-154880746	11.8385	13.4504	0.184163		0.509545	0.37525	0.965723	no	B6UH40_MAIZE WNK6 n=2 (Andropogoneae) Exp=0; maizesequence.org: GO:0006468; protein amino acid phosphorylation | GO:0005524; ATP binding | GO:0004674; protein serine/threonine kinase activity | GO:0004672; protein kinase activity
GRMZM2G114998	4:155033561-155038575	10.3439	8.92834	-0.212316		-0.476107	0.3965	0.975912	no	B6U9H0_MAIZE Putative uncharacterized protein n=1 (Zea mays) Exp=6e-121; maizesequence.org: Uniprot/SPTREMBL:B6U9H0; Putative uncharacterized protein | UniGene:Zm.4624; LOC100278484 | RefSeq_peptide:NP_001145220; hypothetical protein LOC100278484 | RefSeq_dna:NM_001151748; LOC100278484 (si606039h07) mRNA | GO:0045449; regulation of transcription | GO:0016068; type I hypersensitivity | GO:0008270;…
GRMZM2G000520	4:155637629-155639087	0.0174913	0.01861	0.0894405		0	1	1	no	Q6EP81_ORYSJ Os02g0676800 protein n=3 (Oryza sativa) Exp=7e-24; maizesequence.org: GO:0050826; response to freezing | GO:0050825; ice binding | GO:0042309; homoiothermy | GO:0006355; regulation of transcription DNA-dependent | GO:0003700; transcription factor activity | GO:0003677; DNA binding
GRMZM2G003514	4:156111148-156118295	0.0677833	0.042469	-0.67452		0	1	1	no	Q41827_MAIZE MADS box protein n=4 (Andropogoneae) Exp=2e-146; maizesequence.org: Uniprot/SPTREMBL:Q41827; MADS box protein | Uniprot/SPTREMBL:C4JAA4; Putative uncharacterized protein | RefSeq_peptide:NP_001105692; MADS box protein | RefSeq_dna:NM_001112222; MADS box protein (ZAG5) mRNA | MaizeGDB_GenBank:MZEMADSB; product:MADS box protein | GO:0043565; sequence-specific DNA binding | GO:0006355; …
GRMZM2G170322	4:156540261-156549720	2.17284	1.44584	-0.587674		-1.06874	0.06685	0.51848	no	B4FFA6_MAIZE Putative uncharacterized protein n=1 (Zea mays) Exp=4e-165; maizesequence.org: GO:0003677; DNA binding | Uniprot/SPTREMBL:B4FFA6; Putative uncharacterized protein
GRMZM2G178758	4:157223227-157260488	15.7982	16.7867	0.0875585		0.213485	0.7108	0.999071	no	C5Y0S9_SORBI Putative uncharacterized protein Sb04g031330 n=1 (Sorghum bicolor) Exp=0; maizesequence.org: UniGene:Zm.104707; Transcribed locus | UniGene:Zm.97709; TSA: Zea mays contig37955 mRNA sequence
GRMZM2G178795	4:159235120-159239080	2.87417	3.15419	0.134124		0.225893	0.696	0.999071	no	B6U8Z8_MAIZE SRR1-like protein n=1 (Zea mays) Exp=2e-107; maizesequence.org: Uniprot/SPTREMBL:B6U8Z8; SRR1-like protein | UniGene:Zm.136052; SRR1-like protein | RefSeq_peptide:NP_001152112; SRR1-like protein | RefSeq_dna:NM_001158640; SRR1-like protein (LOC100285750) mRNA | EntrezGene:100285750; SRR1-like protein
GRMZM2G176289	4:160020999-160024061	11.2858	11.3223	0.00465837		0.0125931	0.98305	0.999071	no	B4FVV0_MAIZE Putative uncharacterized protein n=1 (Zea mays) Exp=5e-141; maizesequence.org: UniGene:Zm.51748; Transcribed locus | UniGene:Zm.144361; TSA: Zea mays contig55725 mRNA sequence | GO:0045449; regulation of transcription | GO:0030528; transcription regulator activity | GO:0005634; nucleus
GRMZM2G361074	4:160590126-160597529	20.6974	21.4335	0.0504179		0.100451	0.8596	0.999071	no	A0ELV2_PETIN RBX1-like protein n=5 (Spermatophyta) Exp=6e-52; maizesequence.org: Uniprot/SPTREMBL:B4FD56; Putative uncharacterized proteinRING-box protein 1a ; | UniGene:Zm.6061; Hypothetical protein LOC100192928 | RefSeq_peptide:NP_001131583; hypothetical protein LOC100192928 | RefSeq_dna:NM_001138111; hypothetical protein LOC100192928 (LOC100192928) mRNA | GO:0008270; zinc ion binding | GO:0005…
GRMZM2G172427	4:160950627-160967363	10.1055	11.2982	0.160952		0.495199	0.3867	0.972052	no	Q84XG3_MAIZE SET domain protein SDG117 n=1 (Zea mays) Exp=0; maizesequence.org: Uniprot/SPTREMBL:Q84XG3; SET domain protein SDG117 | UniGene:Zm.14536; SET domain protein SDG117 | RefSeq_peptide:NP_001105206; SET domain protein SDG117 | RefSeq_dna:NM_001111736; SET domain protein SDG117 (LOC542103) mRNA | GO:0018024; histone-lysine N-methyltransferase activity | GO:0016568; chromatin modification …
GRMZM2G042198	4:162885358-162893494	0.618609	0.549378	-0.171229		-0.266351	0.63985	0.999071	no	C5XZS4_SORBI Putative uncharacterized protein Sb04g029480 n=2 (Andropogoneae) Exp=0; maizesequence.org: Uniprot/SPTREMBL:B4FE60; Putative uncharacterized proteinZinc finger protein CONSTANS-LIKE 11 ; | UniGene:Zm.18250; Hypothetical protein LOC100193195 | RefSeq_peptide:NP_001131822; hypothetical protein LOC100193195 | RefSeq_dna:NM_001138350; hypothetical protein LOC100193195 (LOC100193195) mRNA…
GRMZM2G167560	4:165343972-165348286	0.00354444	0.00764178	1.10835		0	1	1	no	C5XZS4_SORBI Putative uncharacterized protein Sb04g029480 n=2 (Andropogoneae) Exp=0; maizesequence.org: Uniprot/SPTREMBL:B4FE60; Putative uncharacterized proteinZinc finger protein CONSTANS-LIKE 11 ; | RefSeq_peptide:NP_001131822; hypothetical protein LOC100193195 | GO:0008270; zinc ion binding | GO:0005622; intracellular | EntrezGene:100193195; hypothetical protein LOC100193195
GRMZM2G085547	4:170251415-170260080	15.8193	14.4149	-0.134125		-0.215648	0.7074	0.999071	no	C0PKL8_MAIZE Putative uncharacterized protein n=1 (Zea mays) Exp=0; maizesequence.org: Uniprot/SPTREMBL:C0HFC6; Putative uncharacterized protein | Uniprot/SPTREMBL:B6TU45; Putative uncharacterized protein | GO:0006096; glycolysis | GO:0005515; protein binding | GO:0004618; phosphoglycerate kinase activity
GRMZM2G126646	4:177612035-177616331	0.676212	0.536843	-0.332975		-0.505017	0.3536	0.954077	no	C5XTH9_SORBI Putative uncharacterized protein Sb04g034580 n=2 (Andropogoneae) Exp=0; maizesequence.org: Uniprot/SPTREMBL:B6SRL8; Putative uncharacterized protein | UniGene:Zm.38765; Hypothetical protein LOC100275344 | RefSeq_peptide:NP_001142912; hypothetical protein LOC100275344 | RefSeq_dna:NM_001149440; hypothetical protein LOC100275344 (LOC100275344) mRNA | GO:0043565; sequence-specific DNA b…
GRMZM2G126795	4:177676331-177683190	7.69309	8.25901	0.102406		0.285457	0.62275	0.999071	no	C5XTG7_SORBI Putative uncharacterized protein Sb04g034480 n=1 (Sorghum bicolor) Exp=0; maizesequence.org: GO:0016567; protein ubiquitination | RefSeq_dna:NM_001152363; hypothetical protein LOC100279342 (LOC100279342) mRNA | RefSeq_peptide:NP_001145835; hypothetical protein LOC100279342 | UniGene:Zm.41220; Hypothetical protein LOC100279342 | Uniprot/SPTREMBL:B7ZXN2; Putative uncharacterized protei…
GRMZM2G370777	4:178918188-178925234	79.1474	81.9668	0.0504977		0.150746	0.78515	0.999071	no	Q45V73_LOLPR MADS10 n=5 (Poaceae) Exp=2e-33; maizesequence.org: Uniprot/SPTREMBL:Q84V78; Putative MADS-domain transcription factor | Uniprot/SPTREMBL:Q05HM1; Putative MADS-domain transcription factor | Uniprot/SPTREMBL:C0HGC3; Putative uncharacterized protein | UniGene:Zm.96176; M19 protein | RefSeq_peptide:NP_001105148; m19 protein | RefSeq_dna:NM_001111678; m19 protein (m19) mRNA | GO:0043565; …
GRMZM2G089876	4:183908822-183911284	21.607	19.9998	-0.111513		-0.301852	0.60005	0.999071	no	B6T4Y0_MAIZE Zinc finger HIT domain-containing protein 1 n=2 (Zea mays) Exp=3e-54; maizesequence.org: Uniprot/SPTREMBL:B4FH83; Putative uncharacterized protein | UniGene:Zm.39587; Hypothetical protein LOC100194045 | RefSeq_peptide:NP_001132577; hypothetical protein LOC100194045 | RefSeq_dna:NM_001139105; hypothetical protein LOC100194045 (LOC100194045) mRNA | EntrezGene:100194045; hypothetical pr…
GRMZM2G032619	4:184329821-184335489	278.235	181.204	-0.618689		-1.3944	0.01565	0.22828	no	C5Y3F8_SORBI Putative uncharacterized protein Sb05g001070 n=1 (Sorghum bicolor) Exp=3e-136; maizesequence.org: UniGene:Zm.36969; Transcribed locus moderately similar to XP_002450138.1 hypothetical protein SORBIDRAFT_05g001070 [Sorghum bicolor] | GO:0019028; viral capsid | GO:0006796; phosphate metabolic process | GO:0006468; protein amino acid phosphorylation | GO:0005737; cytoplasm | GO:0005524;…
GRMZM2G174834	4:185907960-185912697	2.62246	2.90757	0.148893		0.316364	0.58755	0.999071	no	C0P7H6_MAIZE Putative uncharacterized protein n=1 (Zea mays) Exp=9e-109; maizesequence.org: GO:0006355; regulation of transcription DNA-dependent | GO:0003700; transcription factor activity | GO:0003677; DNA binding
GRMZM2G146720	4:186214190-186221290	0.742778	1.10604	0.574401		0.123447	0.72325	0.999071	no	B6U6F8_MAIZE Calmodulin-related protein n=2 (Andropogoneae) Exp=1e-97; maizesequence.org: Uniprot/SPTREMBL:B6U6F8; Calmodulin-related protein | RefSeq_peptide:NP_001151914; calmodulin-related protein | RefSeq_dna:NM_001158442; calmodulin-related protein (LOC100285551) mRNA | GO:0005509; calcium ion binding | EntrezGene:100285551; calmodulin-related protein
GRMZM2G171660	4:186772240-186782342	14.488	14.9522	0.0454993		0.123951	0.8286	0.999071	no	C5Y429_SORBI Putative uncharacterized protein Sb05g002130 n=2 (Andropogoneae) Exp=0; maizesequence.org: GO:0003676; nucleic acid binding | UniGene:Zm.84176; Hypothetical protein LOC100273316
GRMZM2G140094	4:187219735-187222248	0.333852	0.211576	-0.658033		-0.780442	0.2136	0.837035	no	C5Y470_SORBI Putative uncharacterized protein Sb05g002490 n=1 (Sorghum bicolor) Exp=7e-113
GRMZM2G055538	4:187471054-187477306	88.784	77.4921	-0.19625		-0.56968	0.3281	0.937689	no	B6T731_MAIZE Myosin-like protein n=2 (Zea mays) Exp=8e-64
GRMZM2G012391	4:187530188-187533672	139.798	103.197	-0.437943		-1.21435	0.03505	0.370658	no	B6SWP5_MAIZE Cytochrome P450 CYP90A21 n=4 (Zea mays) Exp=0; maizesequence.org: RefSeq_peptide:NP_001140596; hypothetical protein LOC100272666 | Uniprot/SPTREMBL:B4FPV4; Putative uncharacterized protein | Uniprot/SPTREMBL:B6SWP5; Cytochrome P450 CYP90A21 | Uniprot/SPTREMBL:C0PDL3; Putative uncharacterized protein | Uniprot/SPTREMBL:C0PFJ1; Putative uncharacterized protein | RefSeq_dna:NM_001147124…
GRMZM2G328742	4:189985908-190016570	3.08628	2.84264	-0.118638		-0.24244	0.6765	0.999071	no	B6TDK0_MAIZE B3 DNA binding domain containing protein n=2 (Zea mays) Exp=3e-99; maizesequence.org: Uniprot/SPTREMBL:B6TDK0; B3 DNA binding domain containing protein | Uniprot/SPTREMBL:B4FEK2; Putative uncharacterized protein | UniGene:Zm.39365; B3 DNA binding domain containing protein | UniGene:Zm.139775; Hypothetical protein LOC100193310 | RefSeq_peptide:NP_001149371; B3 DNA binding domain conta…
GRMZM2G091433	4:191046625-191052377	23.1041	23.8461	0.0456044		0.131226	0.81795	0.999071	no	B6SI55_MAIZE Repressor protein n=4 (Andropogoneae) Exp=2e-133; maizesequence.org: RefSeq_peptide:NP_001105089; LOC541965 | Uniprot/SPTREMBL:B6SI55; Repressor protein | Uniprot/SPTREMBL:C0PJ67; Putative uncharacterized protein | Uniprot/SPTREMBL:Q8W0W6; Putative uncharacterized proteinRepressor protein ; | RefSeq_dna:NM_001111619; LOC541965 (cl181_1c) mRNA | GO:0043565; sequence-specific DNA bindi…
GRMZM2G011473	4:193683050-193702464	34.8699	27.8364	-0.32501		-0.980544	0.07995	0.562869	no	B4FIU4_MAIZE Putative uncharacterized protein n=1 (Zea mays) Exp=0; maizesequence.org: Uniprot/SPTREMBL:C4IZP4; Putative uncharacterized protein | Uniprot/SPTREMBL:C0HHI5; Putative uncharacterized protein | Uniprot/SPTREMBL:B4FIU4; Putative uncharacterized protein | UniGene:Zm.98515; Hypothetical protein LOC100216604 | RefSeq_peptide:NP_001136489; hypothetical protein LOC100216604 | RefSeq_dna:NM…
GRMZM2G363038	4:195709573-195718292	25.9261	25.6501	-0.0154408		-0.0469541	0.9336	0.999071	no	C5YLB8_SORBI Putative uncharacterized protein Sb07g000099 n=1 (Sorghum bicolor) Exp=0; maizesequence.org: UniGene:Zm.4927; TSA: Zea mays contig47639 mRNA sequence | UniGene:Zm.153906; TSA: Zea mays contig36003 mRNA sequence | UniGene:Zm.150527; TSA: Zea mays contig11777 mRNA sequence | UniGene:Zm.143805; TSA: Zea mays contig59930 mRNA sequence | GO:0015629; actin cytoskeleton | GO:0007155; cell a…
GRMZM2G140545	4:197081352-197082741	131.047	112.622	-0.218596		-0.668495	0.2413	0.866994	no	14331_ORYSJ 14-3-3-like protein GF14-A n=7 (Poaceae) Exp=5e-112; maizesequence.org: Uniprot/SPTREMBL:C4IY62; Putative uncharacterized protein | Uniprot/SPTREMBL:C0P6T1; Putative uncharacterized protein | Uniprot/SPTREMBL:B6TFS9; 14-3-3-like protein A | UniGene:Zm.8899; 14-3-3-like protein A | UniGene:Zm.137840; Transcribed locus strongly similar to NP_001149589.1 14-3-3-like protein A [Zea mays] …
GRMZM2G002220	4:197541789-197546600	25.7944	25.7845	-0.000553819		-0.00171544	0.99765	0.999426	no	Q6ZCV7_ORYSJ Os08g0487800 protein n=4 (Poaceae) Exp=0; maizesequence.org: RefSeq_peptide:NP_001169899; hypothetical protein LOC100383793 | UniGene:Zm.138058; Hypothetical protein LOC100383793 | UniGene:Zm.154594; TSA: Zea mays contig32887 mRNA sequence | UniGene:Zm.84967; Transcribed locus strongly similar to XP_002444835.1 hypothetical protein SORBIDRAFT_07g028940 [Sorghum bicolor] | Uniprot/SPT…
GRMZM2G174776	4:198165813-198167061	7.52315	7.11419	-0.0806374		-0.185258	0.7436	0.999071	no	B6UA50_MAIZE Nuclear transcription factor Y subunit C-2 n=2 (Andropogoneae) Exp=1e-55; maizesequence.org: Uniprot/SPTREMBL:B6TWB9; Putative uncharacterized protein | UniGene:Zm.22940; Hypothetical protein LOC100277570 | RefSeq_peptide:NP_001144564; hypothetical protein LOC100277570 | RefSeq_dna:NM_001151092; hypothetical protein LOC100277570 (LOC100277570) mRNA | GO:0050826; response to freezing …
GRMZM2G083411	4:198579834-198590297	0.00421689	0.25	5.8896		0	1	1	no	Q6ZJZ9_ORYSJ Os08g0502000 protein n=3 (Oryza sativa) Exp=2e-180; maizesequence.org: UniGene:Zm.20591; Clone 424887 mRNA sequence
GRMZM2G460544	4:199456663-199460958	0.0530649	0.0441377	-0.265746		0	1	1	no	B7ZYE2_MAIZE Putative uncharacterized protein n=1 (Zea mays) Exp=1e-173; maizesequence.org: Uniprot/SPTREMBL:Q9SM13; SBP-domain protein 7 Fragment | Uniprot/SPTREMBL:B7ZYE2; Putative uncharacterized protein | UniGene:Zm.11846; SBP-domain protein 7 | GO:0005634; nucleus | GO:0005578; proteinaceous extracellular matrix | GO:0005201; extracellular matrix structural constituent | GO:0003677; DNA bind…
GRMZM2G098557	4:200132271-200137588	24.0028	21.2689	-0.174457		-0.534895	0.3484	0.950497	no	C5YIN8_SORBI Putative uncharacterized protein Sb07g027420 n=1 (Sorghum bicolor) Exp=0; maizesequence.org: GO:0016021; integral to membrane | GO:0006813; potassium ion transport | GO:0005634; nucleus | GO:0005249; voltage-gated potassium channel activity | GO:0003677; DNA binding | UniGene:Zm.13184; TSA: Zea mays contig01856 mRNA sequence
GRMZM2G003944	4:205135011-205137037	0.0354191	0.0138358	-1.35612		0	1	1	no	C0P563_MAIZE Putative uncharacterized protein n=1 (Zea mays) Exp=1e-112; maizesequence.org: Uniprot/SPTREMBL:C0P563; Putative uncharacterized protein | UniGene:Zm.99859; Hypothetical protein LOC100382180 | RefSeq_peptide:NP_001168411; hypothetical protein LOC100382180 | RefSeq_dna:NM_001174940; hypothetical protein LOC100382180 (LOC100382180) mRNA | MaizeGDB_GenBank:DQ123899; | GO:0050826; respon…
GRMZM2G106424	4:209972407-209975654	201.715	190.146	-0.0852108		-0.238537	0.6801	0.999071	no	14334_ORYSJ 14-3-3-like protein GF14-D n=11 (Poaceae) Exp=3e-125; maizesequence.org: Uniprot/SPTREMBL:B6T7L9; 14-3-3-like protein | Uniprot/SPTREMBL:B6SZB9; 14-3-3-like protein | Uniprot/SPTREMBL:B4FT47; Putative uncharacterized protein | UniGene:Zm.141167; LOC100282460 | RefSeq_peptide:NP_001148842; LOC100282460 | RefSeq_peptide:NP_001141053; hypothetical protein LOC100273134 | RefSeq_dna:NM_001…
GRMZM2G106363	4:209980832-209983942	3.21992	2.12907	-0.596801		-1.26984	0.0221	0.281975	no	C5Y3X8_SORBI Putative uncharacterized protein Sb05g021030 n=5 (Poaceae) Exp=0; maizesequence.org: Uniprot/SPTREMBL:C0PGG9; Putative uncharacterized protein | Uniprot/SPTREMBL:B7ZZM2; Putative uncharacterized protein | RefSeq_peptide:NP_001146157; hypothetical protein LOC100279726 | RefSeq_dna:NM_001152685; hypothetical protein LOC100279726 (LOC100279726) mRNA | GO:0007165; signal transduction | G…
GRMZM2G458728	4:212853640-212859445	123.974	115.079	-0.107413		-0.288147	0.612	0.999071	no	C5Y550_SORBI Putative uncharacterized protein Sb05g003750 n=1 (Sorghum bicolor) Exp=0; maizesequence.org: UniGene:Zm.150439; TSA: Zea mays contig12213 mRNA sequence | UniGene:Zm.138989; TSA: Zea mays contig25098 mRNA sequence | GO:0043565; sequence-specific DNA binding | GO:0030528; transcription regulator activity | GO:0006355; regulation of transcription DNA-dependent | GO:0005634; nucleus | GO…
GRMZM2G126190	4:214771573-214774269	229.751	215.744	-0.0907507		-0.234635	0.6855	0.999071	no	D1IVV3_VITVI Whole genome shotgun sequence of line PN40024, scaffold_44.assembly12x (Fragment) n=1 (Vitis vinifera) Exp=0; maizesequence.org: UniGene:Zm.97875; Transcribed locus strongly similar to NP_001172758.1 Os01g0964400 [Oryza sativa Japonica Group] | UniGene:Zm.99505; Transcribed locus strongly similar to NP_196543.1 ACT7 (ACTIN 7); structural constituent of cytoskeleton [Arabidopsis thali…
GRMZM2G180054	4:215439894-215440599	0.544784	0.518326	-0.0718246		-0.0791935	0.8902	0.999071	no	C0HHV7_MAIZE Putative uncharacterized protein n=1 (Zea mays) Exp=2e-59; maizesequence.org: GO:0005509; calcium ion binding
GRMZM2G342217	4:21604763-21607924	0.00347574	0.25	6.16846		0	1	1	no	C5Y2P6_SORBI Putative uncharacterized protein Sb05g018070 n=1 (Sorghum bicolor) Exp=0
GRMZM2G051101	4:220528264-220532967	7.53126	8.79962	0.22455		0.582965	0.30795	0.924633	no	B3F0L0_MAIZE SINA3 n=4 (Andropogoneae) Exp=0; maizesequence.org: Uniprot/SPTREMBL:B7ZZQ3; Putative uncharacterized protein | UniGene:Zm.117514; Hypothetical protein LOC100279741 | RefSeq_peptide:NP_001146171; hypothetical protein LOC100279741 | RefSeq_dna:NM_001152699; hypothetical protein LOC100279741 (LOC100279741) mRNA | GO:0050826; response to freezing | GO:0050825; ice binding | GO:0042309; …
GRMZM2G125342	4:221183887-221194638	11.778	12.4473	0.0797383		0.244501	0.6668	0.999071	no	Q7XEZ9_ORYSJ Putative uncharacterized protein n=2 (Oryza sativa) Exp=0; maizesequence.org: UniGene:Zm.47709; Transcribed locus | UniGene:Zm.153753; TSA: Zea mays contig36789 mRNA sequence | UniGene:Zm.153657; TSA: Zea mays contig37343 mRNA sequence | UniGene:Zm.150157; TSA: Zea mays contig13595 mRNA sequence | UniGene:Zm.12793; Clone 394742 mRNA sequence | GO:0016021; integral to membrane | GO:00…
GRMZM2G040320	4:234867574-234878958	10.439	11.4066	0.127885		0.370773	0.5174	0.999071	no	C4J9I2_MAIZE Putative uncharacterized protein n=2 (Zea mays) Exp=0; maizesequence.org: Uniprot/SPTREMBL:C4J9I2; Putative uncharacterized protein | Uniprot/SPTREMBL:B6T7K5; Putative uncharacterized protein | UniGene:Zm.81374; Hypothetical protein LOC100276260 | RefSeq_peptide:NP_001143563; hypothetical protein LOC100276260 | RefSeq_dna:NM_001150091; hypothetical protein LOC100276260 (LOC100276260)…
GRMZM2G163813	4:236142130-236146366	5.84675	6.10695	0.0628171		0.129223	0.82545	0.999071	no	B6TJ35_MAIZE Putative uncharacterized protein n=2 (Zea mays) Exp=2e-68; maizesequence.org: Uniprot/SPTREMBL:B6TJ35; Putative uncharacterized protein | Uniprot/SPTREMBL:B4FF91; Putative uncharacterized protein | UniGene:Zm.5134; LOC100193507 | RefSeq_peptide:NP_001132092; hypothetical protein LOC100193507 | RefSeq_dna:NM_001138620; LOC100193507 (pco114323) mRNA | GO:0005634; nucleus | GO:0003677; …
GRMZM2G036880	4:236369091-236370422	101.161	98.0909	-0.044462		-0.117235	0.8319	0.999071	no	Q5ZA98_ORYSJ Os06g0320500 protein n=6 (Poaceae) Exp=4e-119; maizesequence.org: Uniprot/SPTREMBL:B4FZL4; Chlorophyll a-b binding protein 6APutative uncharacterized protein ; | UniGene:Zm.126340; Chlorophyll a-b binding protein 6A | RefSeq_peptide:NP_001149586; chlorophyll a-b binding protein 6A | RefSeq_dna:NM_001156114; chlorophyll a-b binding protein 6A (LOC100283212) mRNA | EntrezGene:100283212…
GRMZM2G166162	4:237991958-237997623	13.7907	11.1453	-0.30726		-0.93097	0.10185	0.627857	no	C5XUQ8_SORBI Putative uncharacterized protein Sb04g003700 n=1 (Sorghum bicolor) Exp=0; maizesequence.org: UniGene:Zm.141069; Transcribed locus | UniGene:Zm.21829; Full-length cDNA clone ZM_BFb0116B16 | UniGene:Zm.26675; TSA: Zea mays cultivar W22 CL174Contig1.betc mRNA sequence | Uniprot/SPTREMBL:C4J9S3; Putative uncharacterized protein
AC233922.1_FG008	4:238584690-238585814	27.3156	36.2879	0.409763		1.15258	0.0467	0.430631	no	Q6YUS2_ORYSJ Ubiquitin carrier protein n=4 (Poaceae) Exp=1e-60; maizesequence.org: Uniprot/SPTREMBL:B4FSG6; Ubiquitin carrier protein (EC 6.3.2.-) | UniGene:Zm.27068; TSA: Zea mays contig35265 mRNA sequence | GO:0051246; regulation of protein metabolic process | GO:0043687; post-translational protein modification | GO:0019787; small conjugating protein ligase activity
GRMZM2G090156	4:238707294-238712177	11.7199	11.6573	-0.00772658		-0.0226088	0.971	0.999071	no	C5XT05_SORBI Putative uncharacterized protein Sb04g001730 n=2 (Andropogoneae) Exp=0; maizesequence.org: Uniprot/SPTREMBL:C0HIH0; Putative uncharacterized protein | Uniprot/SPTREMBL:B6SXP1; Putative uncharacterized protein | UniGene:Zm.17206; Hypothetical protein LOC100275693 | RefSeq_peptide:NP_001143191; hypothetical protein LOC100275693 | RefSeq_dna:NM_001149719; hypothetical protein LOC1002756…
GRMZM2G106766	4:26526922-26539686	3.56664	3.35504	-0.0882356		-0.221452	0.70455	0.999071	no	C0HEQ7_MAIZE Putative uncharacterized protein n=2 (Zea mays) Exp=0; maizesequence.org: UniGene:Zm.98702; Transcribed locus moderately similar to XP_002444029.1 hypothetical protein SORBIDRAFT_07g006110 [Sorghum bicolor] | UniGene:Zm.98374; Transcribed locus strongly similar to XP_002444029.1 hypothetical protein SORBIDRAFT_07g006110 [Sorghum bicolor] | UniGene:Zm.57909; Transcribed locus
GRMZM2G126552	4:2769171-2772923	15.0239	11.7483	-0.354807		-0.987323	0.08775	0.584202	no	C5Y7G6_SORBI Putative uncharacterized protein Sb05g026120 n=2 (Andropogoneae) Exp=4e-149; maizesequence.org: Uniprot/SPTREMBL:B4FCM3; Putative uncharacterized protein | UniGene:Zm.85936; Hypothetical protein LOC100192788 | RefSeq_peptide:NP_001131453; hypothetical protein LOC100192788 | RefSeq_dna:NM_001137981; hypothetical protein LOC100192788 (LOC100192788) mRNA | EntrezGene:100192788; hypothet…
GRMZM2G007734	4:28943451-28953047	13.4479	13.6648	0.0230834		0.0567981	0.92135	0.999071	no	C5YI06_SORBI Putative uncharacterized protein Sb07g005190 n=1 (Sorghum bicolor) Exp=0
GRMZM2G130442	4:29008616-29014841	12.5732	10.8994	-0.206103		-0.625983	0.27945	0.902549	no	Q9LEE6_MAIZE OCL5 protein n=4 (Andropogoneae) Exp=0; maizesequence.org: MaizeGDB_GenBank:AJ250987; product:OCL5 protein | RefSeq_dna:NM_001111657; OCL5 protein (ocl5) mRNA | RefSeq_peptide:NP_001105127; OCL5 protein | UniGene:Zm.95348; OCL5 protein | Uniprot/SPTREMBL:C0PDK7; Putative uncharacterized protein | Uniprot/SPTREMBL:Q9LEE6; OCL5 protein | GO:0043565; sequence-specific DNA binding | GO:0…
GRMZM2G444073	4:30460408-30461221	1.58337	1.44323	-0.133697		-0.178343	0.7432	0.999071	no	C5YHV2_SORBI Putative uncharacterized protein Sb07g004740 n=1 (Sorghum bicolor) Exp=6e-61; maizesequence.org: GO:0043565; sequence-specific DNA binding | GO:0006355; regulation of transcription DNA-dependent | GO:0005634; nucleus | GO:0005622; intracellular | GO:0003677; DNA binding
GRMZM2G126253	4:30499282-30503694	24.6704	23.098	-0.0950132		-0.29487	0.60725	0.999071	no	C5YHJ0_SORBI Putative uncharacterized protein Sb07g004560 n=1 (Sorghum bicolor) Exp=0; maizesequence.org: UniGene:Zm.82588; Clone 18921 mRNA sequence | UniGene:Zm.36278; Hypothetical protein LOC100384196 | UniGene:Zm.137477; Transcribed locus strongly similar to XP_002445129.1 hypothetical protein SORBIDRAFT_07g004560 [Sorghum bicolor] | RefSeq_dna:NM_001176771; hypothetical protein LOC100384196 …
GRMZM2G055520	4:32811848-32818488	10.6357	10.8745	0.0320341		0.094985	0.8689	0.999071	no	C5YH07_SORBI Putative uncharacterized protein Sb07g003820 n=1 (Sorghum bicolor) Exp=0; maizesequence.org: UniGene:Zm.152502; TSA: Zea mays contig02414 mRNA sequence
GRMZM2G070553	4:3464416-3471903	1.71399	1.23831	-0.468986		-0.952278	0.0964	0.610782	no	B7ZYL1_MAIZE Putative uncharacterized protein n=1 (Zea mays) Exp=0; maizesequence.org: UniGene:Zm.81218; LOC100279529 | RefSeq_dna:NM_001152527; LOC100279529 (cl68462_1) mRNA | GO:0006412; translation | GO:0005840; ribosome | GO:0005622; intracellular | GO:0005515; protein binding | GO:0003735; structural constituent of ribosome
GRMZM2G101511	4:44534641-44539570	2.44515	2.50651	0.035757		0.0696945	0.90055	0.999071	no	Q49I54_MAIZE Teosinte glume architecture 1 n=3 (Zea mays) Exp=3e-159; maizesequence.org: Uniprot/SPTREMBL:Q49IC9; Teosinte glume architecture 1 Fragment | Uniprot/SPTREMBL:Q49IC8; Teosinte glume architecture 1 Fragment | Uniprot/SPTREMBL:Q49IC6; Teosinte glume architecture 1 Fragment | Uniprot/SPTREMBL:Q49IC5; Teosinte glume architecture 1 Fragment | Uniprot/SPTREMBL:Q49IC3; Teosinte glume archit…
AC233751.1_FG002	4:44776397-44811049	0.330823	0.18602	-0.830602		-0.372283	0.5442	0.999071	no	Q49I54_MAIZE Teosinte glume architecture 1 n=3 (Zea mays) Exp=2e-102; maizesequence.org: GO:0003677; DNA binding | GO:0005634; nucleus
GRMZM2G145579	4:47618439-47620839	0.00960802	0.00899163	-0.0956565		0	1	1	no	C4JAG6_MAIZE Putative uncharacterized protein n=1 (Zea mays) Exp=4e-127; maizesequence.org: Uniprot/SPTREMBL:C4JAG6; Putative uncharacterized protein | UniGene:Zm.80918; Full-length cDNA clone ZM_BFb0210J01 | GO:0045449; regulation of transcription | GO:0030528; transcription regulator activity | GO:0005634; nucleus
GRMZM2G157722	4:57698283-57703583	6.50394	6.76902	0.057633		0.150779	0.79325	0.999071	no	B4FRB4_MAIZE BZIP transcription factor ABI5 n=1 (Zea mays) Exp=3e-126; maizesequence.org: Uniprot/SPTREMBL:B4FRB4; BZIP transcription factor ABI5Putative uncharacterized protein ; | GO:0046983; protein dimerization activity | GO:0043565; sequence-specific DNA binding | GO:0006355; regulation of transcription DNA-dependent | GO:0005634; nucleus | GO:0003700; transcription factor activity | GO:0003…
GRMZM2G419409	4:74664864-74666967	0.00306995	0.25	6.34757		0	1	1	no	C5YKQ2_SORBI Putative uncharacterized protein Sb07g019830 n=1 (Sorghum bicolor) Exp=3e-120; maizesequence.org: UniGene:Zm.26418; Transcribed locus weakly similar to XP_002444301.1 hypothetical protein SORBIDRAFT_07g019830 [Sorghum bicolor] | UniGene:Zm.35358; Transcribed locus weakly similar to NP_001061748.1 Os08g0399500 [Oryza sativa Japonica Group]
GRMZM2G160268	4:83199335-83201355	548.514	602.62	0.13572		0.270633	0.62665	0.999071	no	B6SZR1_MAIZE Chlorophyll a-b binding protein 4 n=7 (Poaceae) Exp=2e-138
GRMZM2G152328	5:10234131-10236831	1.13675	1.46833	0.369261		0.590436	0.2984	0.917103	no	ACT11_ARATH Actin-11 n=9 (Viridiplantae) Exp=0; maizesequence.org: EntrezGene:100284092; LOC100284092 | GO:0005515; protein binding | GO:0005524; ATP binding | RefSeq_peptide:NP_001150462; LOC100284092 | Uniprot/SPTREMBL:B6TQ08; Actin-1
GRMZM2G045319	5:110046680-110049528	0.101022	0.080747	-0.323189		0	1	1	no	C5XXX8_SORBI Putative uncharacterized protein Sb04g007150 n=1 (Sorghum bicolor) Exp=0; maizesequence.org: GO:0055114; oxidation reduction | GO:0020037; heme binding | GO:0009055; electron carrier activity | GO:0005506; iron ion binding | GO:0004497; monooxygenase activity
GRMZM2G052821	5:110498743-110551861	9.84111	7.50117	-0.391705		-1.012	0.08075	0.563573	no	B8A2K1_MAIZE Putative uncharacterized protein n=1 (Zea mays) Exp=0; maizesequence.org: UniGene:Zm.136956; Transcribed locus strongly similar to XP_002451747.1 hypothetical protein SORBIDRAFT_04g007140 [Sorghum bicolor] | GO:0006281; DNA repair | GO:0003913; DNA photolyase activity
GRMZM2G114137	5:11383615-11385590	135.891	119.815	-0.181641		-0.522499	0.37325	0.96482	no	B6TFB2_MAIZE CCT motif family protein n=1 (Zea mays) Exp=0; maizesequence.org: Uniprot/SPTREMBL:B6TFB2; CCT motif family protein | UniGene:Zm.127528; CCT motif family protein | RefSeq_peptide:NP_001149548; CCT motif family protein | RefSeq_dna:NM_001156076; CCT motif family protein (LOC100283174) mRNA | GO:0008270; zinc ion binding | GO:0005622; intracellular | EntrezGene:100283174; CCT motif fam…
GRMZM2G024973	5:11793472-11795945	36.4878	33.4129	-0.127009		-0.398592	0.4873	0.999071	no	DWRF8_MAIZE DELLA protein DWARF8 n=6 (Andropogoneae) Exp=0; maizesequence.org: Uniprot/SPTREMBL:Q6R4G6; Gibberelin response modulator dwarf 8 Fragment | Uniprot/SPTREMBL:Q06F07; Dwarf plant9 Fragment | Uniprot/SPTREMBL:Q06F06; Dwarf plant9 Fragment | UniGene:Zm.6402; Dwarf plant9 | UniGene:Zm.149040; TSA: Zea mays contig18854 mRNA sequence
GRMZM2G081075	5:130395455-130399380	6.28714	7.95572	0.339589		0.866055	0.1348	0.710197	no	B3F0L0_MAIZE SINA3 n=4 (Andropogoneae) Exp=0; maizesequence.org: Uniprot/SPTREMBL:O81232; Seven in absentia homolog Fragment | Uniprot/SPTREMBL:C0HEH6; Putative uncharacterized protein | Uniprot/SPTREMBL:B3F0L0; SINA3 | UniGene:Zm.27605; LOC541698 | UniGene:Zm.100870; Transcribed locus strongly similar to XP_002457058.1 hypothetical protein SORBIDRAFT_03g000630 [Sorghum bicolor] | GO:0008270; zin…
GRMZM2G148098	5:13671440-13677614	30.1754	30.0897	-0.00410317		-0.0125585	0.982	0.999071	no	B6SWM4_MAIZE BEL1-related homeotic protein 30 n=2 (Andropogoneae) Exp=0; maizesequence.org: UniGene:Zm.141858; TSA: Zea mays contig48249 mRNA sequence | GO:0043565; sequence-specific DNA binding | GO:0030528; transcription regulator activity | GO:0006355; regulation of transcription DNA-dependent | GO:0005634; nucleus | GO:0003700; transcription factor activity
GRMZM2G176688	5:14609874-14626616	19.2501	17.0474	-0.175314		-0.364435	0.5228	0.999071	no	C5WQC9_SORBI Putative uncharacterized protein Sb01g012610 n=1 (Sorghum bicolor) Exp=1e-169; maizesequence.org: UniGene:Zm.17924; TSA: Zea mays contig13245 mRNA sequence
GRMZM2G161435	5:152442184-152445449	0.0589197	0.0674158	0.194337		0	1	1	no	B6SW91_MAIZE Homeodomain protein JUBEL1 n=2 (Zea mays) Exp=0; maizesequence.org: Uniprot/SPTREMBL:B6SW91; Homeodomain protein JUBEL1 | Uniprot/SPTREMBL:B4FX36; Putative uncharacterized protein | RefSeq_peptide:NP_001141591; hypothetical protein LOC100273707 | GO:0043565; sequence-specific DNA binding | GO:0030528; transcription regulator activity | GO:0006355; regulation of transcription DNA-depe…
GRMZM2G160273	5:158850576-158857975	13.3345	13.0544	-0.0306276		-0.0785071	0.88995	0.999071	no	B4FRH9_MAIZE Fiber protein Fb2 n=1 (Zea mays) Exp=4e-108
GRMZM2G025598	5:161503525-161518350	39.7846	52.3176	0.395086		1.15962	0.04665	0.430631	no	C5XRT8_SORBI Putative uncharacterized protein Sb04g019560 n=4 (Poaceae) Exp=0; maizesequence.org: Uniprot/SPTREMBL:C0PKY4; Putative uncharacterized protein | Uniprot/SPTREMBL:C0PEB6; Putative uncharacterized protein | Uniprot/SPTREMBL:C0HHZ2; Putative uncharacterized protein | UniGene:Zm.31894; Hypothetical protein LOC100381672 | RefSeq_peptide:NP_001167956; hypothetical protein LOC100381672 | Re…
GRMZM2G165488	5:16480096-16484858	1.04898	1.38798	0.404		0.688766	0.2395	0.865425	no	B6SYP8_MAIZE Nuclear transcription factor Y subunit A-10 n=2 (Zea mays) Exp=2e-152; maizesequence.org: GO:0003700; transcription factor activity | GO:0005634; nucleus | GO:0006355; regulation of transcription DNA-dependent | Uniprot/SPTREMBL:B6SYP8; Nuclear transcription factor Y subunit A-10 | Uniprot/SPTREMBL:C0PNR4; Putative uncharacterized protein
GRMZM2G099334	5:167468451-167473891	12.0267	11.0065	-0.127885		-0.367731	0.5264	0.999071	no	C5XTB5_SORBI Putative uncharacterized protein Sb04g021350 n=2 (Andropogoneae) Exp=0; maizesequence.org: Uniprot/SPTREMBL:Q6VGS4; Putative uncharacterized proteinWD40 repeat protein ; | UniGene:Zm.34259; Hypothetical protein LOC100383192 | RefSeq_peptide:NP_001169326; hypothetical protein LOC100383192 | RefSeq_dna:NM_001175855; hypothetical protein LOC100383192 (LOC100383192) mRNA | EntrezGene:100…
GRMZM2G352431	5:172608301-172623007	8.45364	8.19901	-0.044123		-0.136149	0.8138	0.999071	no	C5XU86_SORBI Putative uncharacterized protein Sb04g022620 n=1 (Sorghum bicolor) Exp=0; maizesequence.org: Uniprot/SPTREMBL:B4FHC8; Putative uncharacterized protein | UniGene:Zm.28911; Hypothetical protein LOC100194077 | UniGene:Zm.150859; TSA: Zea mays contig10299 mRNA sequence | RefSeq_peptide:NP_001132605; hypothetical protein LOC100194077 | RefSeq_dna:NM_001139133; hypothetical protein LOC1001…
GRMZM2G417223	5:17290144-17296942	18.8595	15.5817	-0.275439		-0.827315	0.15255	0.742506	no	B6U2B4_MAIZE Nucleic acid binding protein n=1 (Zea mays) Exp=0; maizesequence.org: Uniprot/SPTREMBL:B6U2B4; Nucleic acid binding protein | UniGene:Zm.92858; Hypothetical protein LOC100280160 | UniGene:Zm.67854; Nucleic acid binding protein | UniGene:Zm.30579; Transcribed locus moderately similar to NP_001146564.1 hypothetical protein LOC100280160 [Zea mays] | RefSeq_peptide:NP_001151605; nucleic …
GRMZM2G024739	5:175774996-175794903	74.4791	67.2418	-0.147477		-0.411866	0.4731	0.999071	no	C1KGA5_MAIZE Cryptochrome 1 n=1 (Zea mays) Exp=0; maizesequence.org: Uniprot/SPTREMBL:C1KGA5; Cryptochrome 1 | Uniprot/SPTREMBL:C0HH38; Putative uncharacterized protein | UniGene:Zm.85725; Cryptochrome 1 | RefSeq_peptide:NP_001170477; cryptochrome 1 | RefSeq_dna:NM_001177006; cryptochrome 1 (LOC100384475) mRNA | GO:0006281; DNA repair | GO:0003913; DNA photolyase activity | GenBank:FJ825147; prod…
GRMZM2G061292	5:18177710-18179160	0.25	0.0105889	-4.5613		0	1	1	no	C5WSA3_SORBI Putative uncharacterized protein Sb01g014530 n=1 (Sorghum bicolor) Exp=6e-45; maizesequence.org: GO:0045449; regulation of transcription | GO:0008270; zinc ion binding | GO:0003677; DNA binding
GRMZM2G095299	5:182486592-182488058	263.526	230.396	-0.19383		-0.531901	0.34845	0.950497	no	B6TXF7_MAIZE Salt tolerance-like protein n=4 (Andropogoneae) Exp=8e-108; maizesequence.org: UniGene:Zm.93727; LOC100284784 | RefSeq_peptide:NP_001151151; LOC100284784 | RefSeq_dna:NM_001157679; LOC100284784 (gpm454) mRNA | GO:0008270; zinc ion binding | GO:0005622; intracellular
GRMZM2G138421	5:1843396-1853085	8.26809	9.47156	0.196048		0.541622	0.3429	0.947927	no	C5WU18_SORBI Putative uncharacterized protein Sb01g002530 n=1 (Sorghum bicolor) Exp=0; maizesequence.org: Uniprot/SPTREMBL:B4F8U1; Putative uncharacterized protein | UniGene:Zm.118458; Hypothetical protein LOC100191441 | RefSeq_peptide:NP_001130346; hypothetical protein LOC100191441 | RefSeq_dna:NM_001136874; hypothetical protein LOC100191441 (LOC100191441) mRNA | MaizeGDB_GenBank:AY105715; | GO:…
GRMZM2G148453	5:185461760-185465012	3.32343	3.23605	-0.0384391		-0.0812527	0.8853	0.999071	no	B6SVD1_MAIZE Two-component response regulator-like PRR1 n=2 (Andropogoneae) Exp=2e-125; maizesequence.org: UniGene:Zm.139029; TSA: Zea mays contig10791 mRNA sequence | UniGene:Zm.97178; TSA: Zea mays contig04061 mRNA sequence
GRMZM2G111504	5:186117898-186119612	0.25	0.00688574	-5.18217		0	1	1	no	C5YYQ0_SORBI Putative uncharacterized protein Sb09g021580 n=1 (Sorghum bicolor) Exp=2e-12; maizesequence.org: GO:0045449; regulation of transcription | GO:0003677; DNA binding
GRMZM2G075683	5:186164619-186171926	12.4468	11.8638	-0.0692087		-0.201403	0.729	0.999071	no	C5XXS5_SORBI Putative uncharacterized protein Sb04g026400 n=3 (Andropogoneae) Exp=0; maizesequence.org: Uniprot/SPTREMBL:B4FLT3; Putative uncharacterized protein | UniGene:Zm.118228; Hypothetical protein LOC100217181 | RefSeq_peptide:NP_001137014; hypothetical protein LOC100217181 | RefSeq_dna:NM_001143542; hypothetical protein LOC100217181 (LOC100217181) mRNA | GO:0006468; protein amino acid pho…
GRMZM2G095382	5:186287766-186289446	0.00673244	0.25	5.21465		0	1	1	no	Q0DZF3_ORYSJ Os02g0623400 protein n=3 (Oryza sativa) Exp=2e-66; maizesequence.org: Uniprot/SPTREMBL:B6UCZ4; Putative uncharacterized protein | UniGene:Zm.22048; Hypothetical protein LOC100278742 | RefSeq_peptide:NP_001145392; hypothetical protein LOC100278742 | RefSeq_dna:NM_001151920; hypothetical protein LOC100278742 (LOC100278742) mRNA | EntrezGene:100278742; hypothetical protein LOC100278742
GRMZM2G178603	5:188505433-188506555	0.276864	0.391612	0.500247		0.512499	0.3607	0.956522	no	C5XY73_SORBI Putative uncharacterized protein Sb04g026970 n=1 (Sorghum bicolor) Exp=6e-39; maizesequence.org: GO:0050826; response to freezing | GO:0050825; ice binding | GO:0042309; homoiothermy
GRMZM2G041839	5:191904538-191906156	0.0131346	0.25	4.25048		0	1	1	no	B6TYW5_MAIZE Dehydration-responsive element-binding protein 1B n=1 (Zea mays) Exp=3e-86; maizesequence.org: GO:0006355; regulation of transcription DNA-dependent | GO:0003700; transcription factor activity | GO:0003677; DNA binding
GRMZM2G403218	5:19263505-19277452	8.86559	9.22623	0.0575246		0.123225	0.8294	0.999071	no	C5WTC5_SORBI Putative uncharacterized protein Sb01g015430 n=1 (Sorghum bicolor) Exp=6e-163; maizesequence.org: UniGene:Zm.135603; Clone 460444 mRNA sequence | UniGene:Zm.123731; Transcribed locus weakly similar to XP_002466864.1 hypothetical protein SORBIDRAFT_01g015430 [Sorghum bicolor]
GRMZM2G434203	5:195729656-195730672	0.0366568	0.00938273	-1.966		0	1	1	no	Q6EP81_ORYSJ Os02g0676800 protein n=3 (Oryza sativa) Exp=5e-41; maizesequence.org: GO:0050826; response to freezing | GO:0050825; ice binding | GO:0042309; homoiothermy | GO:0006355; regulation of transcription DNA-dependent | GO:0003700; transcription factor activity | GO:0003677; DNA binding
GRMZM2G137341	5:195885969-195887098	0.25	0.0158297	-3.98122		0	1	1	no	B6TU97_MAIZE Dehydration-responsive element-binding protein 1A n=2 (Andropogoneae) Exp=2e-84; maizesequence.org: Uniprot/SPTREMBL:B6TU97; Dehydration-responsive element-binding protein 1A | UniGene:Zm.132134; Dehydration-responsive element-binding protein 1A | RefSeq_peptide:NP_001150858; dehydration-responsive element-binding protein 1A | RefSeq_dna:NM_001157386; dehydration-responsive element-b…
GRMZM2G160565	5:196601245-196608839	0.00535485	0.00609794	0.187476		0	1	1	no	Q41827_MAIZE MADS box protein n=4 (Andropogoneae) Exp=6e-129; maizesequence.org: RefSeq_dna:NM_001111862; MADS box protein (ZAG3) mRNA | RefSeq_peptide:NP_001105332; MADS box protein | UniGene:Zm.292; MADS box protein | Uniprot/SPTREMBL:Q41826; MADS box proteinPutative uncharacterized protein ; | MaizeGDB_GenBank:MZEMADSA; product:MADS box protein | GO:0043565; sequence-specific DNA binding | GO:…
GRMZM2G058292	5:196661198-196666224	7.01331	6.9057	-0.0223078		-0.0568671	0.91905	0.999071	no	Q3V810_MAIZE Anthocyanin biosynthetic gene regulator PAC1 n=2 (Andropogoneae) Exp=0; maizesequence.org: UniGene:Zm.28312; Full-length cDNA clone ZM_BFc0125I24 | Uniprot/SPTREMBL:Q3V810; Anthocyanin biosynthetic gene regulator PAC1
GRMZM2G024948	5:196723521-196731533	3.99476	4.09621	0.0361808		0.0770711	0.8947	0.999071	no	C5Y0X5_SORBI Putative uncharacterized protein Sb04g031710 n=2 (Andropogoneae) Exp=9e-130; maizesequence.org: GO:0042309; homoiothermy | GO:0003677; DNA binding | GO:0006355; regulation of transcription DNA-dependent | GO:0008270; zinc ion binding | Uniprot/SPTREMBL:C4JC54; Putative uncharacterized protein | GO:0050825; ice binding | GO:0050826; response to freezing | UniGene:Zm.33144; Full-length…
GRMZM2G029850	5:197640907-197660350	4.42311	2.8921	-0.612944		-1.22852	0.03575	0.374358	no	C0HJ55_MAIZE Putative uncharacterized protein n=2 (Zea mays) Exp=2e-102; maizesequence.org: GO:0016068; type I hypersensitivity
GRMZM2G428242	5:198096736-198128436	7.04818	8.38726	0.250949		0.758174	0.19075	0.807646	no	Q6ZGY4_ORYSJ Putative photoperiod independent early flowering1 n=2 (Oryza sativa subsp. japonica) Exp=0; maizesequence.org: GO:0009405; pathogenesis | GO:0005524; ATP binding | GO:0004386; helicase activity | GO:0003677; DNA binding | GO:0003676; nucleic acid binding
GRMZM2G060919	5:199272242-199280212	0.354656	0.218877	-0.6963		-0.9424	0.10335	0.632058	no	B9F1Y1_ORYSJ Putative uncharacterized protein n=2 (Oryza sativa) Exp=0; maizesequence.org: GO:0005634; nucleus
GRMZM2G101350	5:200990644-200996157	6.03828	8.41724	0.47921		0.926343	0.11315	0.65853	no	C4IY39_MAIZE Putative uncharacterized protein n=1 (Zea mays) Exp=8e-120; maizesequence.org: GO:0005634; nucleus | GO:0030528; transcription regulator activity | GO:0045449; regulation of transcription | Uniprot/SPTREMBL:C4IY39; Putative uncharacterized protein
GRMZM2G140694	5:201437665-201441763	0.405195	0.423544	0.0638955		0.0837883	0.88865	0.999071	no	B4FAN2_MAIZE Putative uncharacterized protein n=2 (Zea mays) Exp=1e-140; maizesequence.org: Uniprot/SPTREMBL:B6UAM8; Putative uncharacterized protein | Uniprot/SPTREMBL:B4FAN2; Putative uncharacterized protein | UniGene:Zm.4429; Hypothetical protein LOC100216759 | UniGene:Zm.153145; TSA: Zea mays contig39497 mRNA sequence | RefSeq_peptide:NP_001136632; hypothetical protein LOC100216759 | RefSeq_d…
GRMZM2G125432	5:201650008-201664712	8.18606	8.01683	-0.0301374		-0.0555931	0.92355	0.999071	no	C5Y097_SORBI Putative uncharacterized protein Sb04g030350 n=1 (Sorghum bicolor) Exp=0; maizesequence.org: GO:0018024; histone-lysine N-methyltransferase activity | GO:0016568; chromatin modification | GO:0008270; zinc ion binding | GO:0005634; nucleus | GO:0005622; intracellular
GRMZM2G070523	5:20219034-20221972	0.0328557	0.0503301	0.615278		0	1	1	no	B4FZJ9_MAIZE Putative uncharacterized protein n=1 (Zea mays) Exp=6e-153; maizesequence.org: GO:0003677; DNA binding | UniGene:Zm.87986; Transcribed locus strongly similar to NP_001142050.1 hypothetical protein LOC100274206 [Zea mays]
GRMZM2G075562	5:204223653-204228519	8.07604	10.0404	0.314097		0.892593	0.11785	0.669559	no	C0HFL0_MAIZE Putative uncharacterized protein n=1 (Zea mays) Exp=0; maizesequence.org: Uniprot/SPTREMBL:C0HFL0; Putative uncharacterized protein | RefSeq_peptide:NP_001159328; hypothetical protein LOC100304421 | RefSeq_dna:NM_001165856; hypothetical protein LOC100304421 (LOC100304421) mRNA | GO:0008270; zinc ion binding | GO:0005622; intracellular | EntrezGene:100304421; hypothetical protein LOC1…
GRMZM2G394941	5:204262760-204341577	7.29318	6.37367	-0.194424		-0.228085	0.6938	0.999071	no	C5XZQ2_SORBI Putative uncharacterized protein Sb04g029300 n=1 (Sorghum bicolor) Exp=9e-40; maizesequence.org: GO:0050826; response to freezing | GO:0050825; ice binding | GO:0045449; regulation of transcription | GO:0042309; homoiothermy | GO:0008270; zinc ion binding | GO:0003677; DNA binding
GRMZM2G041991	5:204659224-204661268	17.825	9.73401	-0.872796		-2.50849	5e-05	0.00274723	yes	C5XZC4_SORBI Putative uncharacterized protein Sb04g028920 n=1 (Sorghum bicolor) Exp=7e-179; maizesequence.org: UniGene:Zm.145712; TSA: Zea mays contig45196 mRNA sequence | RefSeq_dna:NM_001153267; hypothetical protein LOC100280341 (LOC100280341) mRNA | GO:0008270; zinc ion binding | GO:0005622; intracellular
GRMZM2G046885	5:209573311-209581383	42.259	41.9907	-0.00918879		-0.0283977	0.95835	0.999071	no	Q45V73_LOLPR MADS10 n=5 (Poaceae) Exp=8e-95; maizesequence.org: Uniprot/SPTREMBL:Q84V69; Putative MADS-domain transcription factor | Uniprot/SPTREMBL:B4FE82; MADS-box transcription factor 22Putative uncharacterized protein ; | UniGene:Zm.14824; M26 protein | UniGene:Zm.120155; Hypothetical protein LOC100217247 | RefSeq_peptide:NP_001105154; m26 protein | RefSeq_dna:NM_001111684; m26 protein (m26)…
GRMZM2G103101	5:209922349-209924302	91.2128	93.0785	0.0292117		0.0864575	0.882	0.999071	no	B6SZ37_MAIZE Chlorophyll a-b binding protein 4 n=3 (Andropogoneae) Exp=5e-87; maizesequence.org: UniGene:Zm.8907; LOC100281795
GRMZM2G479760	5:210071232-210100876	42.053	63.0168	0.583528		1.69972	0.0036	0.0854716	no	B6TVC2_MAIZE BZIP transcription factor ABI5 n=2 (Andropogoneae) Exp=6e-114; maizesequence.org: GO:0043565; sequence-specific DNA binding | GO:0016021; integral to membrane | GO:0007186; G-protein coupled receptor protein signaling pathway | GO:0006355; regulation of transcription DNA-dependent | GO:0003700; transcription factor activity
GRMZM2G104920	5:210789840-210798455	27.8125	31.8554	0.195805		0.597457	0.2992	0.918141	no	C5XTG7_SORBI Putative uncharacterized protein Sb04g034480 n=1 (Sorghum bicolor) Exp=0; maizesequence.org: GO:0050826; response to freezing | GO:0050825; ice binding | GO:0042309; homoiothermy | GO:0016567; protein ubiquitination | GO:0008270; zinc ion binding | GO:0005515; protein binding | GO:0004842; ubiquitin-protein ligase activity | GO:0000151; ubiquitin ligase complex
GRMZM2G145690	5:211123233-211127092	0.0469905	0.0822071	0.806894		0	1	1	no	C5XTH9_SORBI Putative uncharacterized protein Sb04g034580 n=2 (Andropogoneae) Exp=0; maizesequence.org: UniGene:Zm.41296; Full-length cDNA clone ZM_BFb0035G13 | GO:0043565; sequence-specific DNA binding | GO:0030528; transcription regulator activity | GO:0006355; regulation of transcription DNA-dependent | GO:0005634; nucleus | GO:0003700; transcription factor activity
GRMZM2G333565	5:212127073-212129332	0.25	0.00431974	-5.85484		0	1	1	no	B6SW91_MAIZE Homeodomain protein JUBEL1 n=2 (Zea mays) Exp=2e-104; maizesequence.org: GO:0043565; sequence-specific DNA binding | GO:0030528; transcription regulator activity | GO:0006355; regulation of transcription DNA-dependent | GO:0005634; nucleus | GO:0003700; transcription factor activity
GRMZM2G479110	5:213780788-213786044	30.6152	22.983	-0.413681		-1.25746	0.0281	0.32623	no	C5XUH1_SORBI Putative uncharacterized protein Sb04g035980 n=1 (Sorghum bicolor) Exp=0; maizesequence.org: Uniprot/SPTREMBL:B4FYK6; Putative uncharacterized protein | UniGene:Zm.3355; LOC100274010 | UniGene:Zm.118817; Transcribed locus strongly similar to XP_002454708.1 hypothetical protein SORBIDRAFT_04g035980 [Sorghum bicolor] | RefSeq_peptide:NP_001141867; hypothetical protein LOC100274010 | Re…
GRMZM2G030744	5:214476566-214480784	4.68511	4.4379	-0.0782058		-0.186568	0.7493	0.999071	no	B6TQ92_MAIZE Putative uncharacterized protein n=3 (Zea mays) Exp=4e-120; maizesequence.org: Uniprot/SPTREMBL:B4FIY1; Putative uncharacterized protein | UniGene:Zm.81320; Hypothetical protein LOC100216625 | GO:0045449; regulation of transcription | GO:0030528; transcription regulator activity | GO:0005634; nucleus
GRMZM2G150932	5:215066100-215070502	29.1893	29.7512	0.0275082		0.0832721	0.8891	0.999071	no	Q6K988_ORYSJ Os02g0810400 protein n=6 (Poaceae) Exp=0; maizesequence.org: Uniprot/SPTREMBL:C0PI64; Putative uncharacterized protein | Uniprot/SPTREMBL:B8A0Q0; Putative uncharacterized protein | Uniprot/SPTREMBL:B8A0J6; Putative uncharacterized protein | Uniprot/SPTREMBL:B6U2J8; Casein kinase I isoform delta-like | RefSeq_peptide:NP_001151631; casein kinase I isoform delta-like | GO:0006468; prote…
GRMZM2G445944	5:216655507-216657979	7.94346	8.89582	0.16336		0.381903	0.50575	0.999071	no	B6U4G2_MAIZE Putative uncharacterized protein n=1 (Zea mays) Exp=2e-65; maizesequence.org: Uniprot/SPTREMBL:B6U4G2; Putative uncharacterized protein | UniGene:Zm.124672; Hypothetical protein LOC100278144 | RefSeq_peptide:NP_001144989; hypothetical protein LOC100278144 | RefSeq_dna:NM_001151517; hypothetical protein LOC100278144 (LOC100278144) mRNA | EntrezGene:100278144; hypothetical protein LOC1…
GRMZM2G120973	5:25816169-25825972	30.9552	36.4385	0.235282		0.624549	0.27805	0.901078	no	B6UDK8_MAIZE Nucleic acid binding protein n=1 (Zea mays) Exp=0; maizesequence.org: GO:0003723; RNA binding | UniGene:Zm.118320; TSA: Zea mays contig12318 mRNA sequence
GRMZM2G018336	5:28659784-28661138	0.846461	0.389325	-1.12047		-1.51942	0.0143	0.215718	no	B6TX04_MAIZE DNA-binding protein RAV1 n=1 (Zea mays) Exp=2e-79; maizesequence.org: GO:0006355; regulation of transcription DNA-dependent | UniGene:Zm.144802; TSA: Zea mays contig52290 mRNA sequence | GO:0005634; nucleus | GO:0004879; ligand-dependent nuclear receptor activity | GO:0003677; DNA binding
GRMZM2G075039	5:34000925-34011511	0.147623	0.0520305	-1.50449		0	1	1	no	B4F9P2_MAIZE Putative uncharacterized protein n=1 (Zea mays) Exp=0; maizesequence.org: Uniprot/SPTREMBL:B4F9P2; Putative uncharacterized protein | UniGene:Zm.35426; Hypothetical protein LOC100191666 | RefSeq_peptide:NP_001130567; hypothetical protein LOC100191666 | RefSeq_dna:NM_001137095; hypothetical protein LOC100191666 (LOC100191666) mRNA | GO:0003723; RNA binding | EntrezGene:100191666; hypo…
GRMZM2G012958	5:39916761-39930253	51.393	52.1461	0.0209875		0.0557552	0.9169	0.999071	no	C5WP79_SORBI Putative uncharacterized protein Sb01g026590 n=2 (Andropogoneae) Exp=2e-145; maizesequence.org: Uniprot/SPTREMBL:B4FHR5; Putative uncharacterized proteinRAB member of RAS oncogene family-like 3 ; | UniGene:Zm.145818; TSA: Zea mays contig44377 mRNA sequence | RefSeq_peptide:NP_001132705; hypothetical protein LOC100194186 | RefSeq_dna:NM_001139233; hypothetical protein LOC100194186 (LO…
GRMZM2G161512	5:41714514-41716637	0.0411447	0.0368344	-0.159653		0	1	1	no	B4FNN5_MAIZE Putative uncharacterized protein n=1 (Zea mays) Exp=8e-173; maizesequence.org: Uniprot/SPTREMBL:Q9SQB8; R2R3MYB-domain protein Fragment | UniGene:Zm.98627; R2R3MYB-domain protein | GO:0008152; metabolic process | GO:0003824; catalytic activity | GO:0003677; DNA binding
GRMZM2G152432	5:43950422-43955157	3.17774	3.99707	0.330942		0.770161	0.186	0.801235	no	B6UHC3_MAIZE Calmodulin n=1 (Zea mays) Exp=1e-72; maizesequence.org: Uniprot/SPTREMBL:B6UHC3; Calmodulin | UniGene:Zm.127642; Calmodulin | RefSeq_peptide:NP_001152651; calmodulin | RefSeq_dna:NM_001159179; calmodulin (LOC100286292) mRNA | GO:0005509; calcium ion binding | EntrezGene:100286292; calmodulin
GRMZM2G180086	5:44657284-44663403	1.76452	2.28622	0.373688		0.846664	0.138	0.714724	no	C5WQP2_SORBI Putative uncharacterized protein Sb01g027940 n=1 (Sorghum bicolor) Exp=0; maizesequence.org: UniGene:Zm.99751; Clone 660718 mRNA sequence | GO:0005634; nucleus
GRMZM2G124229	5:4606299-4612442	11.3394	8.34286	-0.44273		-1.22941	0.03545	0.372058	no	B4FQ89_MAIZE Putative uncharacterized protein n=1 (Zea mays) Exp=0; maizesequence.org: Uniprot/SPTREMBL:B4FQ89; Putative uncharacterized protein | UniGene:Zm.37466; Hypothetical protein LOC100274216 | RefSeq_peptide:NP_001142060; hypothetical protein LOC100274216 | RefSeq_dna:NM_001148588; hypothetical protein LOC100274216 (LOC100274216) mRNA | GO:0016787; hydrolase activity | GO:0008152; metabol…
GRMZM2G117100	5:46291472-46296611	14.7485	15.7898	0.0984247		0.290103	0.611	0.999071	no	Q8LK11_MAIZE Putative uncharacterized protein n=1 (Zea mays) Exp=2e-153; maizesequence.org: Uniprot/SPTREMBL:Q8LK11; Chromdomain-containing protein CRD101Putative uncharacterized protein ; | UniGene:Zm.2879; Chromdomain-containing protein CRD101 | RefSeq_peptide:NP_001105093; chromdomain-containing protein CRD101 | RefSeq_dna:NM_001111623; chromdomain-containing protein CRD101 (crd101) mRNA | GO:…
GRMZM2G016756	5:5102184-5106618	73.6735	82.053	0.15541		0.435973	0.44015	0.992913	no	C5WY93_SORBI Putative uncharacterized protein Sb01g006190 n=1 (Sorghum bicolor) Exp=2e-141; maizesequence.org: GO:0005634; nucleus | GO:0030528; transcription regulator activity | GO:0045449; regulation of transcription | UniGene:Zm.37440; Transcribed locus
GRMZM2G414805	5:58084256-58089101	7.70013	6.83867	-0.171167		-0.455252	0.4406	0.992913	no	B6TF72_MAIZE Squamosa promoter-binding-like protein 11 n=1 (Zea mays) Exp=1e-105
GRMZM2G141903	5:6381907-6387449	45.807	44.0653	-0.0559251		-0.173711	0.7659	0.999071	no	B6F107_ORYSJ Casein kinase II alpha subunit n=17 (Poaceae) Exp=8e-178; maizesequence.org: Uniprot/SPTREMBL:B4FFH1; Putative uncharacterized protein | GO:0006468; protein amino acid phosphorylation | GO:0005524; ATP binding | GO:0004674; protein serine/threonine kinase activity | GO:0004672; protein kinase activity
GRMZM2G145041	5:64145457-64148638	56.2775	62.0099	0.13994		0.424052	0.4581	0.998202	no	B5TVL7_MAIZE MYB-like protein E1 n=2 (Zea mays) Exp=0; maizesequence.org: Uniprot/SPTREMBL:B6SW63; Putative uncharacterized protein | Uniprot/SPTREMBL:B5TVL7; MYB-like protein E1 | UniGene:Zm.5979; LOC100280442 | RefSeq_peptide:NP_001146835; LOC100280442 | RefSeq_dna:NM_001153363; LOC100280442 (si606002e05) mRNA | GO:0003677; DNA binding | GenBank:FJ024049; product:MYB-like protein E1 | EntrezGen…
GRMZM2G466292	5:65453014-65484296	16.1079	17.4439	0.114954		0.241273	0.6729	0.999071	no	C5Z2N4_SORBI Putative uncharacterized protein Sb10g031260 n=1 (Sorghum bicolor) Exp=0; maizesequence.org: UniGene:Zm.17436; Transcribed locus strongly similar to XP_002437651.1 hypothetical protein SORBIDRAFT_10g031260 [Sorghum bicolor] | GO:0023034; intracellular signaling pathway | GO:0008270; zinc ion binding | GO:0005622; intracellular | GO:0005515; protein binding | GO:0003677; DNA binding
GRMZM2G466270	5:65453014-65484296	16.1079	17.4439	0.114954		0.241273	0.6729	0.999071	no	C5Z2N5_SORBI Putative uncharacterized protein Sb10g031265 (Fragment) n=1 (Sorghum bicolor) Exp=0; maizesequence.org: Uniprot/SPTREMBL:C0HE54; Putative uncharacterized protein | UniGene:Zm.152059; TSA: Zea mays contig04562 mRNA sequence | GO:0008270; zinc ion binding | GO:0005634; nucleus | GO:0005515; protein binding
GRMZM2G071620	5:6925446-6932470	39.3657	33.7288	-0.222958		-0.683417	0.23705	0.862018	no	B4XAV3_MAIZE MADS-box transcription factor 34 n=6 (Zea mays) Exp=1e-135; maizesequence.org: Uniprot/SPTREMBL:Q84V72; M31 proteinMADS-box transcription factor 34Putative uncharacterized protein ;; | Uniprot/SPTREMBL:B4XAV3; MADS-box transcription factor 34ZMM31 MADS-box protein ; | UniGene:Zm.6382; M31 protein | RefSeq_peptide:NP_001105150; m31 protein | RefSeq_dna:NM_001111680; m31 protein (m31) …
GRMZM2G129889	5:7129936-7134953	3.27047	3.49221	0.0946423		0.251474	0.6577	0.999071	no	PHYC_SORBI Phytochrome C n=12 (Andropogoneae) Exp=0; maizesequence.org: GO:0017006; protein-tetrapyrrole linkage | GO:0018298; protein-chromophore linkage | GO:0042803; protein homodimerization activity | GO:0045449; regulation of transcription | RefSeq_dna:NM_001138150; hypothetical protein LOC100192976 (LOC100192976) mRNA | RefSeq_peptide:NP_001131622; hypothetical protein LOC100192976 | UniGen…
GRMZM2G030013	5:73080140-73085773	0.551635	0.236441	-1.22223		-1.57575	0.00815	0.151158	no	B4FCA6_MAIZE Putative uncharacterized protein n=1 (Zea mays) Exp=7e-164; maizesequence.org: GO:0003723; RNA binding
GRMZM2G146354	5:74320935-74324084	18.5098	16.3495	-0.179043		-0.520563	0.36015	0.95649	no	B3F0L4_MAIZE Ubiquitin ligase SINAT2 n=1 (Zea mays) Exp=6e-170; maizesequence.org: Uniprot/SPTREMBL:B3F0L4; SINA2Ubiquitin ligase SINAT2 ; | UniGene:Zm.98552; Transcribed locus moderately similar to NP_001173420.1 Os03g0356414 [Oryza sativa Japonica Group] | UniGene:Zm.73744; SINA2 | RefSeq_peptide:NP_001123598; SINA2 | RefSeq_dna:NM_001130126; SINA2 (LOC100170245) mRNA | GO:0008270; zinc ion bin…
GRMZM2G312738	5:8185471-8196608	9.34825	8.36348	-0.160593		-0.481801	0.40575	0.979295	no	Q6TUB6_ORYSJ Putative uncharacterized protein n=1 (Oryza sativa subsp. japonica) Exp=0; maizesequence.org: UniGene:Zm.17458; Transcribed locus moderately similar to NP_001051200.1 Os03g0737200 [Oryza sativa (japonica cultivar-group)] | UniGene:Zm.98365; TSA: Zea mays contig06901 mRNA sequence
GRMZM2G092311	5:85425434-85426742	1147.4	1189.62	0.0521324		0.0851165	0.87675	0.999071	no	Q5ZA98_ORYSJ Os06g0320500 protein n=6 (Poaceae) Exp=1e-131; maizesequence.org: Uniprot/SPTREMBL:C0P9F5; Putative uncharacterized protein | Uniprot/SPTREMBL:B6SSN3; Chlorophyll a-b binding protein 6APutative uncharacterized protein ; | UniGene:Zm.101204; Transcribed locus moderately similar to NP_001148183.1 chlorophyll a-b binding protein 6A [Zea mays] | RefSeq_peptide:NP_001148183; chlorophyll a…
GRMZM2G126827	5:86820670-86824256	0.25	0.00978264	-4.67556		0	1	1	no	C5XW64_SORBI Putative uncharacterized protein Sb04g004940 n=3 (Andropogoneae) Exp=7e-153; maizesequence.org: EntrezGene:100191346; hypothetical protein LOC100191346 | GO:0003677; DNA binding | GO:0005634; nucleus | RefSeq_dna:NM_001136780; hypothetical protein LOC100191346 (LOC100191346) mRNA | RefSeq_peptide:NP_001130252; hypothetical protein LOC100191346 | UniGene:Zm.98911; Hypothetical protein…
GRMZM2G385543	5:9129442-9131483	0.0298835	0.0352203	0.237058		0	1	1	no	C5WM06_SORBI Putative uncharacterized protein Sb01g009380 n=2 (Andropogoneae) Exp=4e-146; maizesequence.org: UniGene:Zm.103201; Transcribed locus | MaizeGDB_GenBank:AY111937; | GO:0045449; regulation of transcription | GO:0030528; transcription regulator activity | GO:0005634; nucleus
GRMZM2G060485	5:93274266-93277868	9.05098	9.53742	0.075525		0.215894	0.7066	0.999071	no	Q94LW1_MAIZE Response regulator 9 n=2 (Andropogoneae) Exp=0; maizesequence.org: Uniprot/SPTREMBL:C0HHQ1; Putative uncharacterized protein
GRMZM2G104342	5:9827130-9829504	0.0672195	0.0724527	0.10816		0	1	1	no	C5WMW5_SORBI Putative uncharacterized protein Sb01g009740 n=1 (Sorghum bicolor) Exp=5e-176; maizesequence.org: UniGene:Zm.24071; Transcribed locus strongly similar to XP_002466548.1 hypothetical protein SORBIDRAFT_01g009740 [Sorghum bicolor]
GRMZM2G156517	6:110559542-110562813	17.4418	16.3944	-0.0893458		-0.248572	0.666	0.999071	no	B9HDK6_POPTR Ubiquitin carrier protein n=1 (Populus trichocarpa) Exp=1e-81; maizesequence.org: Uniprot/SPTREMBL:B4FBW4; Ubiquitin carrier protein (EC 6.3.2.-) | RefSeq_peptide:NP_001131272; hypothetical protein LOC100192585 | RefSeq_dna:NM_001137800; hypothetical protein LOC100192585 (LOC100192585) mRNA | GO:0051246; regulation of protein metabolic process | GO:0043687; post-translational protein…
GRMZM2G008166	6:111882465-111885951	4.23723	3.72689	-0.185149		-0.378826	0.5114	0.999071	no	B6TJN2_MAIZE BZIP transcription factor family protein n=1 (Zea mays) Exp=5e-67; maizesequence.org: GO:0043565; sequence-specific DNA binding | GO:0006355; regulation of transcription DNA-dependent | GO:0003700; transcription factor activity
GRMZM2G142751	6:112768125-112770230	4.96356	3.65797	-0.440332		-1.04294	0.0726	0.538973	no	C5Z727_SORBI Putative uncharacterized protein Sb10g008030 n=2 (Andropogoneae) Exp=4e-108; maizesequence.org: Uniprot/SPTREMBL:B7ZYZ0; Putative uncharacterized protein | UniGene:Zm.79824; Hypothetical protein LOC100279595 | RefSeq_peptide:NP_001146064; hypothetical protein LOC100279595 | RefSeq_dna:NM_001152592; hypothetical protein LOC100279595 (LOC100279595) mRNA | EntrezGene:100279595; hypothet…
GRMZM2G156910	6:116642509-116661660	13.0536	14.4832	0.149933		0.410488	0.47945	0.999071	no	Q53WJ1_ORYSJ Os05g0196500 protein n=3 (Oryza sativa) Exp=0; maizesequence.org: Uniprot/SPTREMBL:C0PJT4; Putative uncharacterized protein | UniGene:Zm.28189; Hypothetical protein LOC100383891 | RefSeq_peptide:NP_001169988; hypothetical protein LOC100383891 | RefSeq_dna:NM_001176517; hypothetical protein LOC100383891 (LOC100383891) mRNA | GO:0005634; nucleus | GO:0003677; DNA binding | EntrezGene:1…
GRMZM2G075628	6:120144-129443	12.027	13.5067	0.167398		0.519612	0.3626	0.958099	no	C5YLB8_SORBI Putative uncharacterized protein Sb07g000099 n=1 (Sorghum bicolor) Exp=0; maizesequence.org: Uniprot/SPTREMBL:C4IYG5; Putative uncharacterized protein | UniGene:Zm.66963; Hypothetical protein LOC100384540 | RefSeq_peptide:NP_001170526; hypothetical protein LOC100384540 | RefSeq_dna:NM_001177055; hypothetical protein LOC100384540 (LOC100384540) mRNA | GO:0015629; actin cytoskeleton | …
GRMZM2G117057	6:121720042-121721582	0.322499	0.637205	0.982463		0.894083	0.08605	0.578704	no	A8WES3_MAIZE ZCN11 n=1 (Zea mays) Exp=6e-82; maizesequence.org: Uniprot/SPTREMBL:A8WES3; ZCN11 | RefSeq_peptide:NP_001106264; ZCN11 protein | RefSeq_dna:NM_001112793; ZCN11 protein (ZCN11) mRNA | GenBank:EU241927; product:ZCN11 | EntrezGene:100127538; ZCN11 protein
GRMZM2G153250	6:127140346-127150036	40.4043	34.3577	-0.233875		-0.715612	0.20825	0.829441	no	C5Z0H8_SORBI Putative uncharacterized protein Sb09g004190 n=2 (Andropogoneae) Exp=0; maizesequence.org: EntrezGene:100280330; LOC100280330 | Uniprot/SPTREMBL:B8A386; Putative uncharacterized protein | UniGene:Zm.136975; LOC100280330 | RefSeq_peptide:NP_001146728; hypothetical protein LOC100280330 | RefSeq_dna:NM_001153256; LOC100280330 (pco126290a) mRNA | GO:0008270; zinc ion binding | GO:0005515…
GRMZM2G124915	6:134014021-134023125	35.75	30.288	-0.239197		-0.690742	0.23145	0.855801	no	C0PNI5_MAIZE Putative uncharacterized protein n=1 (Zea mays) Exp=3e-176; maizesequence.org: Uniprot/SPTREMBL:B4FCG7; Putative uncharacterized proteinUbiquitin ligase SINAT3 ; | UniGene:Zm.117517; Hypothetical protein LOC100192741 | RefSeq_peptide:NP_001131412; hypothetical protein LOC100192741 | RefSeq_dna:NM_001137940; hypothetical protein LOC100192741 (LOC100192741) mRNA | GO:0008270; zinc ion …
GRMZM2G044301	6:134321281-134327453	2.87946	3.06854	0.0917541		0.226301	0.69475	0.999071	no	Q0DJC2_ORYSJ Os05g0302300 protein n=3 (Oryza sativa) Exp=0; maizesequence.org: GO:0003677; DNA binding | GO:0005634; nucleus | UniGene:Zm.100197; Clone 305622 mRNA sequence
GRMZM2G177001	6:136594022-136599094	0.290196	0.374775	0.368997		0.477887	0.4044	0.979087	no	C5YX95_SORBI Putative uncharacterized protein Sb09g018610 n=1 (Sorghum bicolor) Exp=0; maizesequence.org: GO:0003723; RNA binding | GO:0003676; nucleic acid binding
GRMZM2G013657	6:143487794-143494583	1.09889	0.764132	-0.524153		-0.751114	0.1546	0.744302	no	B4FT20_MAIZE AP2 domain transcription factor n=2 (Zea mays) Exp=0; maizesequence.org: Uniprot/SPTREMBL:B8A329; Putative uncharacterized protein | Uniprot/SPTREMBL:B4FT20; AP2 domain transcription factorPutative uncharacterized protein ; | UniGene:Zm.83210; Hypothetical protein LOC100279334 | RefSeq_peptide:NP_001145827; hypothetical protein LOC100279334 | RefSeq_dna:NM_001152355; hypothetical pro…
GRMZM2G398055	6:147211659-147218885	44.8947	43.235	-0.0543454		-0.154066	0.7959	0.999071	no	C4J6Z1_MAIZE Putative uncharacterized protein n=1 (Zea mays) Exp=8e-106; maizesequence.org: Uniprot/SPTREMBL:C4J6Z1; Putative uncharacterized protein | UniGene:Zm.148525; TSA: Zea mays contig21259 mRNA sequence | GO:0016021; integral to membrane | GO:0007186; G-protein coupled receptor protein signaling pathway | GO:0004930; G-protein coupled receptor activity
GRMZM2G129247	6:150274417-150276924	8.77508	6.02817	-0.541692		-1.31036	0.0245	0.299538	no	B4FSP5_MAIZE Putative uncharacterized protein n=1 (Zea mays) Exp=5e-63; maizesequence.org: Uniprot/SPTREMBL:B4FSP5; Putative uncharacterized protein | GO:0043565; sequence-specific DNA binding | GO:0006355; regulation of transcription DNA-dependent | GO:0003700; transcription factor activity
GRMZM2G125976	6:151227593-151231779	1.06413	1.15465	0.117781		0.214774	0.70205	0.999071	no	C5YZ69_SORBI Putative uncharacterized protein Sb09g022270 n=2 (Andropogoneae) Exp=0; maizesequence.org: Uniprot/SPTREMBL:C4J9N0; Putative uncharacterized protein | Uniprot/SPTREMBL:B4FP92; Putative uncharacterized protein | UniGene:Zm.12357; Hypothetical protein LOC100272551 | RefSeq_peptide:NP_001140490; hypothetical protein LOC100272551 | RefSeq_dna:NM_001147018; hypothetical protein LOC1002725…
GRMZM2G037286	6:155175170-155176649	0.25	0.00659463	-5.24449		0	1	1	no	C5YZV9_SORBI Putative uncharacterized protein Sb09g023750 n=1 (Sorghum bicolor) Exp=0
GRMZM2G117458	6:155657315-155676463	11.3966	12.2099	0.0994479		0.293095	0.61315	0.999071	no	Q84XG4_MAIZE SET domain protein SDG111 n=2 (Zea mays) Exp=0; maizesequence.org: UniGene:Zm.103556; Clone EL01N0414B01 mRNA sequence | GO:0018024; histone-lysine N-methyltransferase activity | GO:0016568; chromatin modification | GO:0008270; zinc ion binding | GO:0005634; nucleus
GRMZM2G117582	6:155708189-155712626	77.0733	76.8289	-0.00458207		-0.0142332	0.98035	0.999071	no	UPI0000DD8A7A Os01g0267900 n=1 (Oryza sativa subsp. japonica) Exp=3e-80; maizesequence.org: RefSeq_peptide:NP_001105490; calmodulin | UniGene:Zm.95895; Calmodulin | Uniprot/SPTREMBL:D0F042; Calmodulin Fragment | Uniprot/SPTREMBL:O22641; Calmodulin | Uniprot/SPTREMBL:Q7DLR7; CalmodulinPutative uncharacterized protein ; | Uniprot/SWISSPROT:P41040; Calmodulin (CaM) | RefSeq_peptide:NP_001105455; cal…
GRMZM2G440949	6:155856084-155863018	5.86395	6.65772	0.183155		0.231379	0.6866	0.999071	no	B6TRK1_MAIZE Dr1-associated corepressor n=2 (Zea mays) Exp=3e-129; maizesequence.org: Uniprot/SPTREMBL:B8A1P0; Putative uncharacterized protein | Uniprot/SPTREMBL:B6TRK1; Dr1-associated corepressor | UniGene:Zm.94965; Dr1-associated corepressor | RefSeq_peptide:NP_001150607; dr1-associated corepressor | RefSeq_dna:NM_001157135; dr1-associated corepressor (LOC100284240) mRNA | GO:0043565; sequence…
AC226373.2_FG010	6:156597736-156613859	20.8434	24.0779	0.208119		0.609913	0.2937	0.913003	no	B6SYE3_MAIZE Zinc finger C-x8-C-x5-C-x3-H type family protein n=1 (Zea mays) Exp=0; maizesequence.org: UniGene:Zm.150549; TSA: Zea mays contig11684 mRNA sequence | UniGene:Zm.147440; TSA: Zea mays contig26173 mRNA sequence | UniGene:Zm.141503; TSA: Zea mays contig27659 mRNA sequence | GO:0009405; pathogenesis | GO:0008270; zinc ion binding | GO:0005576; extracellular region | GO:0003676; nucleic …
GRMZM2G006207	6:157773295-157775678	0.00565628	0.00695813	0.298846		0	1	1	no	14333_ORYSJ 14-3-3-like protein GF14-C n=12 (Poaceae) Exp=8e-123; maizesequence.org: UniGene:Zm.47450; Transcribed locus | GO:0019904; protein domain specific binding
GRMZM2G141756	6:159397187-159400713	6.82372	9.60166	0.492725		0.501381	0.41395	0.983705	no	A8WER9_MAIZE ZCN7 n=3 (Zea mays) Exp=3e-86; maizesequence.org: Uniprot/SPTREMBL:A8WER9; ZCN7 | UniGene:Zm.103289; ZCN7 protein | RefSeq_peptide:NP_001106246; ZCN7 protein | RefSeq_dna:NM_001112775; ZCN7 protein (ZCN7) mRNA | GenBank:EU241923; product:ZCN7 | EntrezGene:100127518; ZCN7 protein
GRMZM2G059939	6:162767826-162769490	21.7536	17.3229	-0.328574		-0.924191	0.1077	0.645639	no	B4FXX4_MAIZE Putative uncharacterized protein n=1 (Zea mays) Exp=2e-75; maizesequence.org: UniGene:Zm.144775; TSA: Zea mays contig52504 mRNA sequence | UniGene:Zm.144737; TSA: Zea mays contig52817 mRNA sequence | GO:0006355; regulation of transcription DNA-dependent | GO:0003700; transcription factor activity | GO:0003677; DNA binding
GRMZM2G038284	6:164572346-164575688	321.163	252.807	-0.345269		-0.878739	0.1205	0.675704	no	C0PCP3_MAIZE Putative uncharacterized protein n=1 (Zea mays) Exp=3e-101; maizesequence.org: Uniprot/SPTREMBL:C0PCP3; Putative uncharacterized protein
GRMZM2G402936	6:165101051-165102377	3330.48	3391.16	0.0260487		0.0246934	0.9674	0.999071	no	B4FGG4_MAIZE Putative uncharacterized protein n=1 (Zea mays) Exp=2e-39; maizesequence.org: UniGene:Zm.132911; Transcribed locus moderately similar to XP_002440263.1 hypothetical protein SORBIDRAFT_09g028720 [Sorghum bicolor] | UniGene:Zm.128422; Light harvesting chlorophyll a /b binding protein | UniGene:Zm.126656; Transcribed locus moderately similar to NP_001105427.1 light harvesting chlorophyl…
GRMZM2G366778	6:165198081-165211593	0.00374437	0.25	6.06106		0	1	1	no	14334_ORYSJ 14-3-3-like protein GF14-D n=11 (Poaceae) Exp=9e-45; maizesequence.org: GO:0019904; protein domain specific binding
GRMZM2G402002	6:167630051-167639191	27.3903	24.7866	-0.144105		-0.447179	0.4339	0.99089	no	C5YX01_SORBI Putative uncharacterized protein Sb09g030580 n=1 (Sorghum bicolor) Exp=0; maizesequence.org: Uniprot/SPTREMBL:B7ZY61; Putative uncharacterized protein | UniGene:Zm.87679; Hypothetical protein LOC100279448 | RefSeq_peptide:NP_001145925; hypothetical protein LOC100279448 | RefSeq_dna:NM_001152453; hypothetical protein LOC100279448 (LOC100279448) mRNA | MaizeGDB_GenBank:AY105594; | GO:0…
GRMZM2G416701	6:29008564-29013707	17.8975	14.2673	-0.327046		-0.982431	0.0916	0.596129	no	Q2TQ34_ORYSJ Transcription factor AP2D23-like n=3 (Oryza sativa) Exp=2e-103; maizesequence.org: UniGene:Zm.99687; Hypothetical protein LOC100384775 | RefSeq_peptide:NP_001170700; hypothetical protein LOC100384775 | RefSeq_dna:NM_001177229; hypothetical protein LOC100384775 (LOC100384775) mRNA | GO:0006355; regulation of transcription DNA-dependent | GO:0003700; transcription factor activity | GO:…
GRMZM2G179069	6:36946637-36948605	8.53211	10.7511	0.33351		0.867686	0.12865	0.695185	no	Q41801_MAIZE Dof3 gene (Fragment) n=1 (Zea mays) Exp=9e-88; maizesequence.org: Uniprot/SPTREMBL:Q41801; Dof3 gene Fragment | UniGene:Zm.155842; Full-length cDNA clone ZM_BFb0008N02 | GO:0045449; regulation of transcription | GO:0008270; zinc ion binding | GO:0003677; DNA binding
GRMZM2G104017	6:41346513-41352652	56.08	58.4772	0.0603879		0.161655	0.7739	0.999071	no	D1IVV3_VITVI Whole genome shotgun sequence of line PN40024, scaffold_44.assembly12x (Fragment) n=1 (Vitis vinifera) Exp=0; maizesequence.org: Uniprot/SPTREMBL:P93635; Actin Fragment | GO:0005524; ATP binding | GO:0005515; protein binding
GRMZM2G110378	6:41395224-41398185	37.6872	37.492	-0.00749182		-0.0230469	0.967	0.999071	no	D1IVV3_VITVI Whole genome shotgun sequence of line PN40024, scaffold_44.assembly12x (Fragment) n=1 (Vitis vinifera) Exp=0; maizesequence.org: Uniprot/SPTREMBL:P93635; Actin Fragment | Uniprot/SPTREMBL:B4FMG7; Putative uncharacterized protein | Uniprot/SPTREMBL:B4F989; Actin-97Putative uncharacterized protein ; | RefSeq_peptide:NP_001130463; hypothetical protein LOC100191561 | GO:0005524; ATP bind…
GRMZM2G027253	6:56611495-56612170	0.0282798	0.0565147	0.998854		0	1	1	no	C5Z276_SORBI Putative uncharacterized protein Sb10g000780 n=1 (Sorghum bicolor) Exp=9e-62; maizesequence.org: GO:0003677; DNA binding | GO:0006355; regulation of transcription DNA-dependent
GRMZM2G013617	6:56969089-56972582	8.94381	7.6727	-0.221155		-0.506131	0.38085	0.968746	no	B4FS21_MAIZE Putative uncharacterized protein n=1 (Zea mays) Exp=0; maizesequence.org: Uniprot/SPTREMBL:B4FS21; Putative uncharacterized protein | RefSeq_peptide:NP_001140899; hypothetical protein LOC100272976 | RefSeq_dna:NM_001147427; hypothetical protein LOC100272976 (LOC100272976) mRNA | GO:0043565; sequence-specific DNA binding | GO:0030528; transcription regulator activity | GO:0016301; kin…
GRMZM2G380377	6:62712929-62714535	0.0213116	0.0174925	-0.284902		0	1	1	no	C3UZ69_MAIZE DRE-binding protein 4 n=1 (Zea mays) Exp=3e-88; maizesequence.org: RefSeq_dna:NM_001177010; DRE-binding protein 4 (DBP4) mRNA | RefSeq_peptide:NP_001170481; DRE-binding protein 4 | UniGene:Zm.156738; Transcribed locus strongly similar to NP_001170481.1 DRE-binding protein 4 [Zea mays] | UniGene:Zm.9463; DRE-binding protein 4 | Uniprot/SPTREMBL:C3UZ69; DRE-binding protein 4 | GO:00508…
GRMZM2G107756	6:75265111-75267274	0.25	0.0164772	-3.92339		0	1	1	no	14333_ORYSJ 14-3-3-like protein GF14-C n=12 (Poaceae) Exp=3e-124; maizesequence.org: GO:0019904; protein domain specific binding
GRMZM2G051338	6:76400210-76402023	17.6392	26.1996	0.57076		1.28772	0.02445	0.299453	no	Q2PQ56_LOLPR FT3 n=18 (Poaceae) Exp=1e-39; maizesequence.org: Uniprot/SPTREMBL:A8WES6; ZCN15 | RefSeq_peptide:NP_001106252; LOC100127524 | RefSeq_dna:NM_001112781; LOC100127524 (cl846_1) mRNA | GenBank:EU241930; product:ZCN15 | EntrezGene:100127524; LOC100127524
GRMZM2G139073	6:84949623-84954298	0.0427032	0.0435633	0.0287691		0	1	1	no	B6TKZ2_MAIZE MADS-box transcription factor 16 n=4 (Poaceae) Exp=1e-117; maizesequence.org: Uniprot/SPTREMBL:Q9M6N9; MADS-box DNA binding proteinMADS-box transcription factor 16Putative uncharacterized protein ;; | Uniprot/SPTREMBL:B6TKZ2; MADS-box transcription factor 16 | UniGene:Zm.487; Silky1 | RefSeq_peptide:NP_001104951; silky1 | RefSeq_dna:NM_001111481; silky1 (si1) mRNA | MaizeGDB_GenBank:…
GRMZM2G027995	6:87282558-87286379	180.767	180.131	-0.00508484		-0.0135581	0.9813	0.999071	no	IF4A1_ORYSJ Eukaryotic initiation factor 4A-1 n=28 (Magnoliophyta) Exp=0; maizesequence.org: RefSeq_dna:NM_001111926; translational initiation factor eIF-4A (tif-4A3) mRNA | RefSeq_dna:NM_001157592; eukaryotic initiation factor 4A (LOC100284697) mRNA | RefSeq_peptide:NP_001105372; eukaryotic initiation factor 4A | RefSeq_peptide:NP_001105396; translational initiation factor eIF-4A | RefSeq_peptid…
GRMZM2G113244	6:88750796-88757067	27.7627	29.3565	0.0805321		0.249775	0.66595	0.999071	no	ADO1_ORYSJ Adagio-like protein 1 n=4 (Poaceae) Exp=0; maizesequence.org: Uniprot/SPTREMBL:B6T8N3; Putative uncharacterized protein | UniGene:Zm.98955; Transcribed locus strongly similar to XP_002438923.1 hypothetical protein SORBIDRAFT_10g028340 [Sorghum bicolor] | UniGene:Zm.156443; TSA: Zea mays contig63514 mRNA sequence | UniGene:Zm.147406; TSA: Zea mays contig26328 mRNA sequence | RefSeq_pept…
GRMZM2G423833	6:89300615-89308222	2.43605	3.13361	0.363282		0.792875	0.17185	0.775487	no	C0PHI8_MAIZE Putative uncharacterized protein n=1 (Zea mays) Exp=0; maizesequence.org: Uniprot/SPTREMBL:C0PHI8; Putative uncharacterized protein | UniGene:Zm.80801; Hypothetical protein LOC100383604 | RefSeq_peptide:NP_001169723; hypothetical protein LOC100383604 | RefSeq_dna:NM_001176252; hypothetical protein LOC100383604 (LOC100383604) mRNA | GO:0003677; DNA binding | EntrezGene:100383604; hypo…
GRMZM2G093789	6:89403117-89416241	4.77489	6.82657	0.515693		1.33736	0.02085	0.272787	no	B4FXU8_MAIZE Putative uncharacterized protein n=1 (Zea mays) Exp=0; maizesequence.org: EntrezGene:100273858; LOC100273858 | GO:0003677; DNA binding | RefSeq_dna:NM_001148255; LOC100273858 (si687017b11a) mRNA | RefSeq_peptide:NP_001141727; hypothetical protein LOC100273858 | UniGene:Zm.80939; LOC100273858 | Uniprot/SPTREMBL:B4FXU8; Putative uncharacterized protein
GRMZM2G057408	6:93259853-93265695	16.5858	17.306	0.0613237		0.177243	0.7534	0.999071	no	B6TEC6_MAIZE DNA binding protein n=3 (Zea mays) Exp=2e-145; maizesequence.org: Uniprot/SPTREMBL:C0PKZ6; Putative uncharacterized protein | UniGene:Zm.99969; Transcribed locus moderately similar to NP_001149442.1 DNA binding protein [Zea mays] | GO:0030288; outer membrane-bounded periplasmic space | GO:0009428; bacterial-type flagellum basal body distal rod P ring | GO:0005198; structural molecule…
GRMZM2G161666	6:93656695-93658911	0.0124332	0.00673175	-0.885144		0	1	1	no	C5Z7N5_SORBI Putative uncharacterized protein Sb10g026690 n=1 (Sorghum bicolor) Exp=2e-73; maizesequence.org: GO:0043565; sequence-specific DNA binding | GO:0006355; regulation of transcription DNA-dependent | GO:0005634; nucleus | GO:0003700; transcription factor activity
GRMZM2G101499	6:95232271-95235580	0.0166296	0.0125915	-0.401303		0	1	1	no	Q9SM17_MAIZE SBP-domain protein 3 n=1 (Zea mays) Exp=5e-152; maizesequence.org: Uniprot/SPTREMBL:Q9SM17; SBP-domain protein 3 | UniGene:Zm.102139; Transcribed locus | RefSeq_peptide:NP_001105116; SBP-domain protein3 | RefSeq_dna:NM_001111646; SBP-domain protein3 (sbp3) mRNA | GO:0005634; nucleus | GO:0003677; DNA binding | EntrezGene:541995; SBP-domain protein3
GRMZM2G074438	6:98786269-98791819	0.315991	0.185459	-0.768783		-0.833159	0.1464	0.732289	no	B9FU49_ORYSJ Putative uncharacterized protein n=1 (Oryza sativa subsp. japonica) Exp=7e-93; maizesequence.org: UniGene:Zm.130724; Clone 1603585 mRNA sequence | GO:0045449; regulation of transcription | GO:0030528; transcription regulator activity | GO:0015629; actin cytoskeleton | GO:0007155; cell adhesion | GO:0005634; nucleus | GO:0005198; structural molecule activity
GRMZM2G091265	7:105935512-105940065	15.6835	14.6008	-0.1032		-0.290404	0.61415	0.999071	no	B6TEF9_MAIZE DNA binding protein n=3 (Andropogoneae) Exp=6e-112; maizesequence.org: GO:0008270; zinc ion binding | GO:0005515; protein binding | GO:0003677; DNA binding
GRMZM2G021416	7:11575183-11579816	170.666	137.472	-0.312038		-0.812366	0.15905	0.752537	no	C5XB56_SORBI Putative uncharacterized protein Sb02g004750 n=1 (Sorghum bicolor) Exp=0; maizesequence.org: RefSeq_peptide:NP_001169399; hypothetical protein LOC100383268 | UniGene:Zm.144252; TSA: Zea mays contig56642 mRNA sequence | RefSeq_dna:NM_001175928; hypothetical protein LOC100383268 (LOC100383268) mRNA | GO:0050826; response to freezing | GO:0050825; ice binding | GO:0042309; homoiothermy
GRMZM2G141219	7:117877953-117881926	0.853194	0.845358	-0.0133114		-0.0199354	0.97215	0.999071	no	B4FR94_MAIZE Putative uncharacterized protein n=1 (Zea mays) Exp=0; maizesequence.org: Uniprot/SPTREMBL:B4FR94; Putative uncharacterized protein | GO:0006355; regulation of transcription DNA-dependent | GO:0003700; transcription factor activity | GO:0003677; DNA binding
GRMZM2G089850	7:130393750-130395017	3.7834	4.56296	0.270287		0.548209	0.3178	0.930829	no	C4J9K3_MAIZE Putative uncharacterized protein n=1 (Zea mays) Exp=9e-44; maizesequence.org: Uniprot/SPTREMBL:C4J9K3; Putative uncharacterized protein | UniGene:Zm.34711; Full-length cDNA clone ZM_BFb0075C15 | GO:0050826; response to freezing | GO:0050825; ice binding | GO:0045449; regulation of transcription | GO:0042309; homoiothermy | GO:0008270; zinc ion binding | GO:0003677; DNA binding
GRMZM2G078691	7:131218517-131219657	20.3436	20.1886	-0.0110341		-0.0301233	0.9585	0.999071	no	Q0J0W2_ORYSJ Os09g0480700 protein (Fragment) n=2 (Oryza sativa subsp. japonica) Exp=4e-54; maizesequence.org: GO:0050825; ice binding | GO:0050826; response to freezing | RefSeq_dna:NM_001155829; nuclear transcription factor Y subunit C-2 (LOC100282924) mRNA | RefSeq_peptide:NP_001149301; nuclear transcription factor Y subunit C-2 | UniGene:Zm.6990; Nuclear transcription factor Y subunit C-2 | Un…
GRMZM2G097726	7:13356453-13364295	16.2403	17.2771	0.0892828		0.257665	0.6506	0.999071	no	Q0D838_ORYSJ Os07g0186400 protein (Fragment) n=5 (Poaceae) Exp=1e-75; maizesequence.org: UniGene:Zm.141421; TSA: Zea mays contig24412 mRNA sequence | GO:0003677; DNA binding
GRMZM2G097059	7:136296028-136307251	0.0101487	0.25	4.62256		0	1	1	no	B6T736_MAIZE MADS-box transcription factor 8 n=6 (Andropogoneae) Exp=1e-138; maizesequence.org: UniGene:Zm.99961; MADS-domain transcription factor 4 | Uniprot/SPTREMBL:B4FMG3; Putative uncharacterized protein | Uniprot/SPTREMBL:B6T736; MADS-box transcription factor 8 | Uniprot/SPTREMBL:D3YBA1; MADS-domain transcription factor | Uniprot/SPTREMBL:Q9ZR65; Putative MADS-domain transcription factor Fr…
GRMZM2G144275	7:137522633-137525144	35.4673	31.8983	-0.15301		-0.464071	0.42025	0.986833	no	B6U6D0_MAIZE BHLH transcription factor n=3 (Zea mays) Exp=2e-88; maizesequence.org: GO:0005634; nucleus | GO:0030528; transcription regulator activity | GO:0045449; regulation of transcription
GRMZM2G070038	7:140709805-140716607	22.5569	22.8442	0.0182591		0.056555	0.9228	0.999071	no	C5X5E6_SORBI Putative uncharacterized protein Sb02g029880 n=1 (Sorghum bicolor) Exp=0; maizesequence.org: GO:0003676; nucleic acid binding | UniGene:Zm.151663; TSA: Zea mays contig06469 mRNA sequence | UniGene:Zm.83675; TSA: Zea mays contig04354 mRNA sequence | UniGene:Zm.99252; TSA: Zea mays contig06676 mRNA sequence
GRMZM2G116658	7:141712280-141718468	28.7716	34.0994	0.245101		0.735767	0.20315	0.823725	no	Q9LEE8_MAIZE OCL3 protein n=2 (Andropogoneae) Exp=0; maizesequence.org: Uniprot/SPTREMBL:Q9LEE8; OCL3 protein | Uniprot/SPTREMBL:C0PK20; Putative uncharacterized protein | UniGene:Zm.688; Outer cell layer3 | UniGene:Zm.145905; TSA: Zea mays contig43394 mRNA sequence | RefSeq_peptide:NP_001105125; outer cell layer3 | RefSeq_dna:NM_001111655; outer cell layer3 (ocl3) mRNA | GO:0043565; sequence-spe…
GRMZM2G134797	7:149950097-149954818	358.571	367.541	0.0356464		0.0921577	0.8741	0.999071	no	NDK1_ORYSJ Nucleoside diphosphate kinase 1 n=7 (Poaceae) Exp=2e-61; maizesequence.org: Uniprot/SPTREMBL:Q8RUV3; Nucleoside-diphosphate kinase-like protein Fragment | Uniprot/SPTREMBL:Q8RUV2; Nucleoside-diphosphate kinase-like protein Fragment | MaizeGDB_GenBank:AF498549; product:nucleoside-diphosphate kinase-like protein | MaizeGDB_GenBank:AF498536; product:nucleoside-diphosphate kinase-like prot…
GRMZM2G108589	7:1519823-1523155	0.517775	0.373561	-0.470981		-0.669944	0.24415	0.870325	no	B4FIH5_MAIZE Putative uncharacterized protein n=2 (Zea mays) Exp=0; maizesequence.org: Uniprot/SPTREMBL:B6U8H1; Putative uncharacterized protein | Uniprot/SPTREMBL:B4FIH5; Putative uncharacterized protein | UniGene:Zm.118119; Hypothetical protein LOC100194382 | RefSeq_peptide:NP_001132887; hypothetical protein LOC100194382 | RefSeq_dna:NM_001139415; hypothetical protein LOC100194382 (LOC100194382…
GRMZM2G156692	7:15327432-15334148	10.1221	11.172	0.142379		0.414157	0.46905	0.999071	no	C5XCI8_SORBI Putative uncharacterized protein Sb02g005690 n=1 (Sorghum bicolor) Exp=2e-91; maizesequence.org: GO:0015629; actin cytoskeleton | GO:0007155; cell adhesion | GO:0006396; RNA processing | GO:0005199; structural constituent of cell wall | GO:0005198; structural molecule activity
GRMZM2G057281	7:157607232-157609225	346.493	479.873	0.469826		0.936217	0.09555	0.607236	no	CB23_HORVU Chlorophyll a-b binding protein of LHCII type III, chloroplastic n=9 (Poaceae) Exp=2e-142; maizesequence.org: Uniprot/SPTREMBL:B6SUM9; Chlorophyll a-b binding protein of LHCII type III | UniGene:Zm.94444; Chlorophyll a-b binding protein of LHCII type III | UniGene:Zm.155182; TSA: Zea mays contig30485 mRNA sequence | RefSeq_peptide:NP_001150523; chlorophyll a-b binding protein of LHCII …
GRMZM2G106548	7:158386470-158408665	13.7037	16.9117	0.303456		0.521022	0.3663	0.959837	no	B6SU23_MAIZE Nodulation signaling pathway 2 protein n=1 (Zea mays) Exp=0; maizesequence.org: Uniprot/SPTREMBL:Q6ULS4; Scarecrow-like 23 Fragment | Uniprot/SPTREMBL:B6SU23; Nodulation signaling pathway 2 protein | UniGene:Zm.18106; Scarecrow-like 23 | UniGene:Zm.150194; TSA: Zea mays contig13406 mRNA sequence
GRMZM2G305211	7:159951152-159960399	0.867546	0.829005	-0.0655595		-0.0868043	0.87935	0.999071	no	14334_ORYSJ 14-3-3-like protein GF14-D n=11 (Poaceae) Exp=6e-59; maizesequence.org: GO:0019904; protein domain specific binding
GRMZM2G017016	7:162600513-162606044	29.7977	30.0873	0.0139537		0.0407378	0.94735	0.999071	no	B6UHM1_MAIZE Putative uncharacterized protein n=1 (Zea mays) Exp=1e-53; maizesequence.org: Uniprot/SPTREMBL:B6UHM1; Putative uncharacterized protein
GRMZM2G147716	7:164451096-164456819	168.473	154.234	-0.127397		-0.364604	0.5217	0.999071	no	Q84V67_MAIZE MADS-box transcription factor 18 n=2 (Andropogoneae) Exp=2e-121; maizesequence.org: Uniprot/SPTREMBL:Q84V67; MADS-box transcription factor 18Putative MADS-domain transcription factorPutative uncharacterized protein ;; | Uniprot/SPTREMBL:C4JB78; Putative uncharacterized protein | UniGene:Zm.14366; LOC542045 | RefSeq_peptide:NP_001105155; LOC542045 | RefSeq_dna:NM_001111685; LOC542045 …
GRMZM2G384528	7:164733506-164734923	3.12444	3.13633	0.00547973		0.0102809	0.9873	0.999071	no	B6SUG8_MAIZE Nuclear transcription factor Y subunit B-3 n=1 (Zea mays) Exp=7e-77; maizesequence.org: Uniprot/SPTREMBL:B6SUG8; Nuclear transcription factor Y subunit B-3 | UniGene:Zm.67900; Nuclear transcription factor Y subunit B-3 | RefSeq_peptide:NP_001147727; nuclear transcription factor Y subunit B-3 | RefSeq_dna:NM_001154255; nuclear transcription factor Y subunit B-3 (LOC100281337) mRNA | G…
GRMZM2G351482	7:164811282-164814080	13.3233	9.63102	-0.468191		-1.00017	0.08755	0.583815	no	C5XDX8_SORBI Putative uncharacterized protein Sb02g038880 n=1 (Sorghum bicolor) Exp=5e-92; maizesequence.org: GO:0016787; hydrolase activity | GO:0008152; metabolic process
GRMZM2G038303	7:165027075-165035287	4.10544	4.84794	0.239835		0.225436	0.7335	0.999071	no	B6SPD7_MAIZE Nuclear transcription factor Y subunit A-3 n=3 (Zea mays) Exp=1e-149; maizesequence.org: Uniprot/SPTREMBL:C0P2G8; Putative uncharacterized protein | Uniprot/SPTREMBL:B6SPF1; Nuclear transcription factor Y subunit A-3 | Uniprot/SPTREMBL:B6SPD7; Nuclear transcription factor Y subunit A-3 | Uniprot/SPTREMBL:B4FNM1; Putative uncharacterized protein | RefSeq_peptide:NP_001147311; nuclear …
AC211504.4_FG003	7:169626142-169629152	0.0463764	0.010885	-2.09105		0	1	1	no	C5X3Y7_SORBI Putative uncharacterized protein Sb02g041000 n=1 (Sorghum bicolor) Exp=2e-146; maizesequence.org: GO:0016787; hydrolase activity | GO:0008152; metabolic process
GRMZM2G037478	7:169866202-169867375	0.0413324	0.018684	-1.14547		0	1	1	no	Q8H5P9_ORYSJ Os07g0643100 protein n=2 (Oryza sativa) Exp=9e-130; maizesequence.org: GO:0016787; hydrolase activity | GO:0008152; metabolic process
GRMZM2G104141	7:169882371-169883683	0.0066079	0.0196526	1.57246		0	1	1	no	C5X3Y7_SORBI Putative uncharacterized protein Sb02g041000 n=1 (Sorghum bicolor) Exp=9e-143; maizesequence.org: UniGene:Zm.24296; Transcribed locus moderately similar to XP_002461116.1 hypothetical protein SORBIDRAFT_02g041020 [Sorghum bicolor] | GO:0016787; hydrolase activity | GO:0008152; metabolic process
GRMZM2G301932	7:169964251-169967512	8.37755	11.2741	0.428412		1.09545	0.05525	0.470607	no	B6TXN5_MAIZE Gibberellin receptor GID1L2 n=1 (Zea mays) Exp=0; maizesequence.org: Uniprot/SPTREMBL:B6TXN5; Gibberellin receptor GID1L2Putative uncharacterized protein ; | RefSeq_peptide:NP_001151174; gibberellin receptor GID1L2 | RefSeq_dna:NM_001157702; gibberellin receptor GID1L2 (LOC100284807) mRNA | GO:0016787; hydrolase activity | GO:0008152; metabolic process | EntrezGene:100284807; gibbere…
GRMZM2G301934	7:169977937-169979914	3.1175	6.01619	0.948461		2.19777	5e-05	0.00274723	yes	B6TKK2_MAIZE Gibberellin receptor GID1L2 n=2 (Andropogoneae) Exp=0; maizesequence.org: Uniprot/SPTREMBL:B6TKK2; Gibberellin receptor GID1L2Putative uncharacterized protein ; | UniGene:Zm.2710; LOC100283680 | RefSeq_peptide:NP_001150053; LOC100283680 | RefSeq_dna:NM_001156581; LOC100283680 (pco145234) mRNA | GO:0016787; hydrolase activity | GO:0008152; metabolic process | EntrezGene:100283680; LOC…
GRMZM2G091449	7:17005244-17019545	12.048	12.8053	0.0879474		0.2717	0.64005	0.999071	no	Q7X971_ORYSJ Putative uncharacterized protein n=1 (Oryza sativa subsp. japonica) Exp=0; maizesequence.org: GO:0003676; nucleic acid binding | GO:0005634; nucleus | UniGene:Zm.21992; Transcribed locus moderately similar to NP_001059140.1 Os07g0203700 [Oryza sativa Japonica Group] | UniGene:Zm.30850; TSA: Zea mays contig37385 mRNA sequence
GRMZM2G019666	7:170436698-170439815	0.0088714	0.0142534	0.684072		0	1	1	no	C5X426_SORBI Putative uncharacterized protein Sb02g041330 n=1 (Sorghum bicolor) Exp=0; maizesequence.org: UniGene:Zm.24200; Transcribed locus moderately similar to XP_002463290.1 hypothetical protein SORBIDRAFT_02g041330 [Sorghum bicolor] | UniGene:Zm.25986; Transcribed locus weakly similar to NP_001168492.1 hypothetical protein LOC100382270 [Zea mays] | GO:0055114; oxidation reduction | GO:00200…
GRMZM2G009265	7:171227375-171249887	0.332547	0.36021	0.11528		0.0408458	0.9545	0.999071	no	B3F0L3_MAIZE SINA6 n=4 (Andropogoneae) Exp=0; maizesequence.org: Uniprot/SPTREMBL:B6SRI2; Putative uncharacterized proteinUbiquitin ligase SINAT5 ; | Uniprot/SPTREMBL:B3F0L3; SINA6 | UniGene:Zm.86969; SINA6 | RefSeq_peptide:NP_001123597; SINA6 | RefSeq_dna:NM_001130125; SINA6 (LOC100170244) mRNA | GO:0008270; zinc ion binding | GO:0007275; multicellular organismal development | GO:0006511; ubiqui…
GRMZM2G348863	7:172504991-172505370	2.5487	0.976673	-1.38381		-1.45569	0.0176	0.245887	no	C5X4Y0_SORBI Putative uncharacterized protein Sb02g042480 n=1 (Sorghum bicolor) Exp=1e-51
GRMZM2G348863	7:172504991-172505370	2.5487	0.976673	-1.38381		-1.45569	0.0176	0.245887	no	C5X4Y0_SORBI Putative uncharacterized protein Sb02g042480 n=1 (Sorghum bicolor) Exp=1e-51
GRMZM2G067921	7:175583964-175585451	0.0119108	0.0232459	0.964706		0	1	1	no	A1E240_MAIZE Delayed flowering1 n=2 (Zea mays) Exp=4e-71; maizesequence.org: RefSeq_dna:NM_001112492; delayed flowering1 (DLF1) mRNA | RefSeq_peptide:NP_001105962; delayed flowering1 | UniGene:Zm.105296; Transcribed locus | UniGene:Zm.139551; Delayed flowering1 | Uniprot/SPTREMBL:A1E240; Delayed flowering1 | Uniprot/SPTREMBL:A1E241; Delayed flowering1 | GO:0046983; protein dimerization activity |…
GRMZM2G032711	7:175604479-175615856	2.26309	1.37514	-0.718715		-0.630541	0.27665	0.900108	no	Q8LPU3_MAIZE Nucleosome/chromatin assembly factor 104 n=1 (Zea mays) Exp=0; maizesequence.org: Uniprot/SPTREMBL:Q8LPU3; Nucleosome/chromatin assembly factor 104 | Uniprot/SPTREMBL:B4FZY9; Putative uncharacterized proteinWD-40 repeat protein MSI1 ; | UniGene:Zm.10802; Nucleosome/chromatin assembly factor 104 | RefSeq_peptide:NP_001105188; nucleosome/chromatin assembly factor 104 | RefSeq_dna:NM_00…
GRMZM2G019879	7:1975015-1982933	14.187	13.9551	-0.0237771		-0.0728404	0.8985	0.999071	no	C5X7A4_SORBI Putative uncharacterized protein Sb02g001060 n=1 (Sorghum bicolor) Exp=0; maizesequence.org: GO:0001503; ossification | GO:0007155; cell adhesion
GRMZM2G072582	7:2065443-2076981	133.385	105.14	-0.343285		-0.946623	0.0988	0.617961	no	C0PKE1_MAIZE Putative uncharacterized protein n=1 (Zea mays) Exp=3e-18
GRMZM5G845755	7:2136346-2144430	34.8086	38.0748	0.129393		0.176739	0.74875	0.999071	no	No significant hits (1e-5); maizesequence.org: Uniprot/SPTREMBL:C0PN23; Putative uncharacterized protein | UniGene:Zm.118418; Protein kinase CK2 catalytic subunit CK2 alpha-3 | GO:0006468; protein amino acid phosphorylation | GO:0005524; ATP binding | GO:0004674; protein serine/threonine kinase activity | GO:0004672; protein kinase activity
GRMZM2G165098	7:21431247-21433436	13.498	15.7009	0.218102		0.601772	0.29265	0.912769	no	C5XDH2_SORBI Putative uncharacterized protein Sb02g006860 n=1 (Sorghum bicolor) Exp=3e-157; maizesequence.org: GO:0005515; protein binding | UniGene:Zm.23196; TSA: Zea mays contig20300 mRNA sequence
GRMZM2G176175	7:22015364-22026546	0.956732	1.03956	0.119786		0.177118	0.7627	0.999071	no	C0L9Q9_MAIZE Sister of indeterminate spikelet 1 (Fragment) n=2 (Zea mays) Exp=0; maizesequence.org: Uniprot/SPTREMBL:C0L9Q9; Sister of indeterminate spikelet 1 Fragment | Uniprot/SPTREMBL:B6UAC1; Floral homeotic proteinPutative uncharacterized protein ; | GO:0016021; integral to membrane | GO:0007186; G-protein coupled receptor protein signaling pathway | GO:0006355; regulation of transcription D…
GRMZM2G008234	7:3186861-3189788	0.121628	0.123531	0.0223977		0	1	1	no	C4JBR6_MAIZE Putative uncharacterized protein n=1 (Zea mays) Exp=1e-109; maizesequence.org: Uniprot/SPTREMBL:C4JBR6; Putative uncharacterized protein | UniGene:Zm.23283; Full-length cDNA clone ZM_BFc0105N21 | GO:0006355; regulation of transcription DNA-dependent | GO:0003700; transcription factor activity | GO:0003677; DNA binding
GRMZM2G034288	7:38217886-38231107	8.83162	9.13986	0.049494		0.14248	0.80705	0.999071	no	C5X500_SORBI Putative uncharacterized protein Sb02g010210 n=1 (Sorghum bicolor) Exp=0; maizesequence.org: GO:0005634; nucleus | GO:0008270; zinc ion binding | GO:0016568; chromatin modification | GO:0018024; histone-lysine N-methyltransferase activity | UniGene:Zm.59895; Hypothetical protein LOC100277465
GRMZM2G012654	7:68994824-68997112	7.24262	7.33674	0.0186275		0.0445137	0.94255	0.999071	no	B6TCI2_MAIZE DNA polymerase epsilon subunit 3 n=1 (Zea mays) Exp=2e-69; maizesequence.org: GO:0043565; sequence-specific DNA binding | RefSeq_dna:NM_001155803; DNA polymerase epsilon subunit 3 (LOC100282897) mRNA | RefSeq_peptide:NP_001149275; DNA polymerase epsilon subunit 3 | UniGene:Zm.123266; DNA polymerase epsilon subunit 3 | Uniprot/SPTREMBL:B6TCI2; DNA polymerase epsilon subunit 3Putative …
GRMZM2G398996	7:7070208-7071628	0.0531849	0.0722559	0.442099		0	1	1	no	C5XA94_SORBI Putative uncharacterized protein Sb02g003620 n=1 (Sorghum bicolor) Exp=1e-145; maizesequence.org: UniGene:Zm.133662; Clone 452693 mRNA sequence | GO:0016787; hydrolase activity | GO:0008152; metabolic process | GO:0006508; proteolysis | GO:0004252; serine-type endopeptidase activity
GRMZM2G160316	7:71173353-71194892	58.7532	54.5671	-0.106636		-0.32032	0.58095	0.999071	no	B4FTU1_MAIZE ABI3-interacting protein 2 n=2 (Andropogoneae) Exp=7e-76
GRMZM2G320298	7:7123030-7124333	3.85597	3.17279	-0.281342		-0.547014	0.3528	0.953397	no	C5XA95_SORBI Putative uncharacterized protein Sb02g003630 n=1 (Sorghum bicolor) Exp=4e-167; maizesequence.org: GO:0008152; metabolic process | GO:0016787; hydrolase activity
GRMZM2G013794	7:72261133-72305789	8.48854	8.70318	0.0360262		0.10752	0.85105	0.999071	no	Q6K431_ORYSJ Os09g0134500 protein n=2 (Oryza sativa subsp. japonica) Exp=0; maizesequence.org: Uniprot/SPTREMBL:C4J2G2; Putative uncharacterized protein | UniGene:Zm.98874; Transcribed locus moderately similar to XP_002459928.1 hypothetical protein SORBIDRAFT_02g016820 [Sorghum bicolor] | GO:0023034; intracellular signaling pathway | GO:0008270; zinc ion binding | GO:0005634; nucleus | GO:0005515…
GRMZM2G388253	7:76561116-76604526	33.3074	44.7711	0.426725		1.01984	0.0708	0.534016	no	B9G0E7_ORYSJ Putative uncharacterized protein n=1 (Oryza sativa subsp. japonica) Exp=7e-130; maizesequence.org: GO:0005515; protein binding | GO:0008270; zinc ion binding
GRMZM2G470740	7:76561116-76604526	33.3074	44.7711	0.426725		1.01984	0.0708	0.534016	no	C5X873_SORBI Putative uncharacterized protein Sb02g019320 n=1 (Sorghum bicolor) Exp=0; maizesequence.org: UniGene:Zm.138619; Transcribed locus weakly similar to XP_002459962.1 hypothetical protein SORBIDRAFT_02g019320 [Sorghum bicolor] | UniGene:Zm.123256; TSA: Zea mays contig48887 mRNA sequence
GRMZM2G173756	7:79030303-79034786	15.0818	15.0108	-0.00680776		-0.0174262	0.9755	0.999071	no	Q69JN7_ORYSJ Ubiquitin carrier protein n=11 (Spermatophyta) Exp=4e-74; maizesequence.org: Uniprot/SPTREMBL:B4FCQ9; Ubiquitin carrier protein (EC 6.3.2.-) | RefSeq_peptide:NP_001131478; hypothetical protein LOC100192813 | GO:0051246; regulation of protein metabolic process | GO:0043687; post-translational protein modification | GO:0019787; small conjugating protein ligase activity | EntrezGene:100…
GRMZM2G131489	7:81954099-81965889	59.9415	64.5178	0.106142		0.32711	0.5654	0.999071	no	C5X8D1_SORBI Putative uncharacterized protein Sb02g020290 n=1 (Sorghum bicolor) Exp=7e-144; maizesequence.org: Uniprot/SPTREMBL:B4FYZ4; Putative uncharacterized protein | RefSeq_peptide:NP_001141936; hypothetical protein LOC100274085 | EntrezGene:100274085; LOC100274085
GRMZM2G391795	7:84392849-84394590	1.53522	1.50685	-0.0269096		-0.0454551	0.9358	0.999071	no	C4J9M8_MAIZE Putative uncharacterized protein n=1 (Zea mays) Exp=0; maizesequence.org: Uniprot/SPTREMBL:C4J9M8; Putative uncharacterized protein | UniGene:Zm.823; Full-length cDNA clone ZM_BFb0101O22 | GO:0016787; hydrolase activity | GO:0008152; metabolic process
GRMZM2G011742	7:8705525-8709166	57.4332	53.9975	-0.0889923		-0.274097	0.6327	0.999071	no	Q6ZA60_ORYSJ cDNA clone:J013002L11, full insert sequence n=2 (Oryza sativa) Exp=0; maizesequence.org: UniGene:Zm.73544; TSA: Zea mays contig27251 mRNA sequence
GRMZM2G132868	8:100221798-100225370	4.79675	4.74205	-0.0165464		-0.0389193	0.9469	0.999071	no	B6TGZ0_MAIZE G-box-binding factor 4 n=1 (Zea mays) Exp=3e-80; maizesequence.org: Uniprot/SPTREMBL:B6TGZ0; G-box-binding factor 4 | UniGene:Zm.31952; G-box-binding factor 4 | RefSeq_peptide:NP_001149687; G-box-binding factor 4 | RefSeq_dna:NM_001156215; G-box-binding factor 4 (LOC100283313) mRNA | GO:0046983; protein dimerization activity | GO:0043565; sequence-specific DNA binding | GO:0006355; r…
GRMZM2G471600	8:104345278-104346616	2.17383	1.75305	-0.310372		-0.525787	0.36295	0.958099	no	C4J6Z1_MAIZE Putative uncharacterized protein n=1 (Zea mays) Exp=7e-90
GRMZM2G082959	8:104612611-104613898	0.0684308	0.0613954	-0.156515		0	1	1	no	B6U9V9_MAIZE Hsr203J n=2 (Andropogoneae) Exp=4e-138; maizesequence.org: GO:0016787; hydrolase activity | GO:0008152; metabolic process
GRMZM2G016605	8:106153568-106156492	5.21766	5.91952	0.182077		0.454226	0.4421	0.992913	no	B0S4S8_SORBI Putative GID1-like gibberellin receptor n=4 (Andropogoneae) Exp=3e-146; maizesequence.org: Uniprot/SPTREMBL:B4FJG3; Putative uncharacterized protein | RefSeq_peptide:NP_001136607; hypothetical protein LOC100216730 | RefSeq_dna:NM_001143135; hypothetical protein LOC100216730 (LOC100216730) mRNA | EntrezGene:100216730; hypothetical protein LOC100216730
GRMZM2G109354	8:106259013-106278403	24.6245	27.1369	0.140161		0.397647	0.4866	0.999071	no	C5YXS3_SORBI Putative uncharacterized protein Sb09g020110 n=1 (Sorghum bicolor) Exp=0; maizesequence.org: UniGene:Zm.32258; TSA: Zea mays contig52328 mRNA sequence | UniGene:Zm.148443; TSA: Zea mays contig21627 mRNA sequence | UniGene:Zm.146616; TSA: Zea mays contig29806 mRNA sequence | UniGene:Zm.144292; TSA: Zea mays contig56273 mRNA sequence | GO:0005634; nucleus | GO:0003677; DNA binding
GRMZM2G049661	8:10855881-10857679	0.0943445	0.0773004	-0.287463		0	1	1	no	C5XE60_SORBI Putative uncharacterized protein Sb03g007670 n=1 (Sorghum bicolor) Exp=1e-106; maizesequence.org: GO:0016881; acid-amino acid ligase activity | UniGene:Zm.130593; Clone 395240 mRNA sequence
GRMZM2G132759	8:118566245-118570591	525.139	493.408	-0.0899182		-0.240291	0.6773	0.999071	no	B9HDK6_POPTR Ubiquitin carrier protein n=1 (Populus trichocarpa) Exp=3e-81; maizesequence.org: UniGene:Zm.97850; Transcribed locus strongly similar to NP_566331.1 UBC11 (UBIQUITIN-CONJUGATING ENZYME 11); ubiquitin-protein ligase [Arabidopsis thaliana] | Uniprot/SPTREMBL:B6T1C0; Ubiquitin carrier protein (EC 6.3.2.-) | Uniprot/SPTREMBL:B6T1T5; Ubiquitin carrier protein (EC 6.3.2.-) | Uniprot/SPTRE…
GRMZM2G161009	8:119246142-119249647	8.01467	8.2573	0.043027		0.115024	0.8414	0.999071	no	B6TN24_MAIZE BZIP transcription factor n=2 (Andropogoneae) Exp=1e-158; maizesequence.org: Uniprot/SPTREMBL:B6TN24; BZIP transcription factorPutative uncharacterized protein ; | UniGene:Zm.76927; LOC100283911 | RefSeq_peptide:NP_001150281; LOC100283911 | RefSeq_dna:NM_001156809; LOC100283911 (gpm841) mRNA | GO:0046983; protein dimerization activity | GO:0043565; sequence-specific DNA binding | GO:…
GRMZM2G005557	8:119429402-119430831	2.32251	1.68761	-0.460703		-0.698646	0.23335	0.857127	no	C5Z082_SORBI Putative uncharacterized protein Sb09g024030 n=1 (Sorghum bicolor) Exp=4e-58
GRMZM2G166089	8:126398498-126406791	38.6616	41.5648	0.104461		0.315361	0.5853	0.999071	no	Q5ZC88_ORYSJ Os01g0369000 protein n=8 (Poaceae) Exp=1e-116; maizesequence.org: GO:0031625; ubiquitin protein ligase binding | GO:0031461; cullin-RING ubiquitin ligase complex | GO:0006511; ubiquitin-dependent protein catabolic process
GRMZM2G351977	8:141176050-141177936	689.61	682.302	-0.0153702		-0.0267817	0.95675	0.999071	no	CB48_MAIZE Chlorophyll a-b binding protein 48, chloroplastic n=3 (Zea mays) Exp=7e-141; maizesequence.org: Uniprot/SPTREMBL:B4G143; Chlorophyll a-b binding protein 2Putative uncharacterized protein ; | RefSeq_peptide:NP_001142284; hypothetical protein LOC100274453 | EntrezGene:100274453; hypothetical protein LOC100274453
GRMZM2G091276	8:144234755-144239080	9.68234	6.70955	-0.52914		-1.33353	0.0216	0.27802	no	C5XR49_SORBI Putative uncharacterized protein Sb03g028240 n=2 (Andropogoneae) Exp=2e-76
GRMZM2G086088	8:147738063-147741180	160.556	149.233	-0.10551		-0.305567	0.5887	0.999071	no	UBC10_ARATH Ubiquitin-conjugating enzyme E2 10 n=103 (Embryophyta) Exp=3e-80; maizesequence.org: Uniprot/SPTREMBL:B6UG63; Ubiquitin carrier protein (EC 6.3.2.-) | Uniprot/SPTREMBL:B6T650; Ubiquitin carrier protein (EC 6.3.2.-) | Uniprot/SPTREMBL:B6SYI7; Ubiquitin carrier protein (EC 6.3.2.-) | RefSeq_peptide:NP_001152583; LOC100286223 | RefSeq_dna:NM_001159111; LOC100286223 (cl25406_3a) mRNA | GO…
GRMZM2G000489	8:14935733-14937194	8.25859	12.2678	0.570909		1.4533	0.0121	0.194791	no	B6SXT6_MAIZE Gibberellin receptor GID1L2 n=2 (Zea mays) Exp=3e-143; maizesequence.org: RefSeq_peptide:NP_001148081; gibberellin receptor GID1L2 | UniGene:Zm.35179; Gibberellin receptor GID1L2 | Uniprot/SPTREMBL:B4FJV4; Putative uncharacterized protein | Uniprot/SPTREMBL:B6SXT6; Gibberellin receptor GID1L2 | RefSeq_dna:NM_001154609; gibberellin receptor GID1L2 (LOC100281689) mRNA | GO:0016787; hyd…
GRMZM2G014066	8:149461133-149464730	10.7812	10.1826	-0.0824118		-0.226859	0.69405	0.999071	no	B4FDK3_MAIZE Fiber protein Fb2 n=4 (Andropogoneae) Exp=2e-98; maizesequence.org: Uniprot/SPTREMBL:C0P4W3; Putative uncharacterized protein | Uniprot/SPTREMBL:B6T3D5; Fiber protein Fb2 | UniGene:Zm.102804; Fiber protein Fb2 | RefSeq_peptide:NP_001148469; fiber protein Fb2 | RefSeq_dna:NM_001154997; fiber protein Fb2 (LOC100282084) mRNA | EntrezGene:100282084; fiber protein Fb2
GRMZM2G061602	8:155434341-155442104	13.4468	13.7796	0.0352711		0.10459	0.85685	0.999071	no	C5XIF4_SORBI Putative uncharacterized protein Sb03g033340 n=1 (Sorghum bicolor) Exp=0; maizesequence.org: GO:0004674; protein serine/threonine kinase activity | GO:0005524; ATP binding | GO:0006468; protein amino acid phosphorylation
GRMZM2G001139	8:155471126-155475291	0.25	0.00586897	-5.41268		0	1	1	no	B6UCT1_MAIZE MADS-box transcription factor 32 n=3 (Zea mays) Exp=4e-80; maizesequence.org: Uniprot/SPTREMBL:B4FKK2; Putative uncharacterized protein | UniGene:Zm.59094; Transcribed locus | UniGene:Zm.127013; Transcribed locus strongly similar to NP_001146353.1 hypothetical protein LOC100279931 [Zea mays] | UniGene:Zm.103323; Hypothetical protein LOC100216936 | RefSeq_peptide:NP_001136792; hypothe…
GRMZM2G067702	8:156260023-156261399	0.594136	0.190618	-1.64011		-1.90721	0.0018	0.0517514	no	B6SQE7_MAIZE ARR1 protein-like n=1 (Zea mays) Exp=3e-114; maizesequence.org: Uniprot/SPTREMBL:B6SQE7; ARR1 protein-like | UniGene:Zm.15210; ARR1 protein-like | RefSeq_peptide:NP_001147359; ARR1 protein-like | RefSeq_dna:NM_001153887; ARR1 protein-like (LOC100280967) mRNA | EntrezGene:100280967; ARR1 protein-like | Uniprot/SPTREMBL:B8A1T5; Putative uncharacterized protein
GRMZM2G030762	8:162106867-162110024	6.04116	5.23892	-0.205556		-0.504158	0.3807	0.968746	no	C4J948_MAIZE Putative uncharacterized protein n=1 (Zea mays) Exp=1e-26; maizesequence.org: UniGene:Zm.144105; TSA: Zea mays contig57774 mRNA sequence | GO:0045449; regulation of transcription | GO:0030528; transcription regulator activity | GO:0008270; zinc ion binding | GO:0006508; proteolysis | GO:0005634; nucleus | GO:0004181; metallocarboxypeptidase activity
GRMZM2G168079	8:166357553-166362143	0.0307984	0.004366	-2.81847		0	1	1	no	B6UI01_MAIZE ABA response element binding factor n=2 (Zea mays) Exp=7e-138; maizesequence.org: Uniprot/SPTREMBL:B6UI01; ABA response element binding factor | Uniprot/SPTREMBL:B6U1B2; ABA response element binding factor | UniGene:Zm.18160; ABA response element binding factor | RefSeq_peptide:NP_001151515; ABA response element binding factor | RefSeq_dna:NM_001158043; ABA response element binding f…
GRMZM2G081127	8:166700-174330	18.4959	17.436	-0.0851364		-0.232468	0.67855	0.999071	no	SPL1_ORYSJ Squamosa promoter-binding-like protein 1 n=3 (Oryza sativa) Exp=0; maizesequence.org: UniGene:Zm.4901; TSA: Zea mays contig40567 mRNA sequence | GO:0005634; nucleus | GO:0003677; DNA binding
GRMZM2G082490	8:173272808-173273930	0.0821101	0.0407954	-1.00915		0	1	1	no	C5XKS3_SORBI Putative uncharacterized protein Sb03g035080 n=1 (Sorghum bicolor) Exp=1e-38; maizesequence.org: UniGene:Zm.139449; TSA: Zea mays contig30587 mRNA sequence | GO:0045449; regulation of transcription | GO:0008270; zinc ion binding | GO:0003677; DNA binding
GRMZM2G355525	8:174326945-174333920	8.28285	7.12055	-0.218139		-0.561921	0.32965	0.938933	no	C5Z082_SORBI Putative uncharacterized protein Sb09g024030 n=1 (Sorghum bicolor) Exp=1e-44; maizesequence.org: GO:0005509; calcium ion binding
GRMZM2G107101	8:21104079-21112662	46.3336	48.2581	0.0587123		0.156306	0.78635	0.999071	no	GIGAN_ORYSJ Protein GIGANTEA n=7 (Poaceae) Exp=0; maizesequence.org: Uniprot/SPTREMBL:B1NY83; Gigantea1A Fragment
AC187157.4_FG005	8:22645968-22650386	7.0609	7.89493	0.161074		0.454133	0.4323	0.990381	no	C5XLT3_SORBI Putative uncharacterized protein Sb03g002660 n=1 (Sorghum bicolor) Exp=0; maizesequence.org: GO:0003700; transcription factor activity | GO:0006355; regulation of transcription DNA-dependent | GO:0043565; sequence-specific DNA binding | UniGene:Zm.64451; Transcribed locus strongly similar to XP_002454995.1 hypothetical protein SORBIDRAFT_03g002660 [Sorghum bicolor] | Uniprot/SPTREMBL…
AC187157.4_FG001	8:22689605-22691545	0.385365	0.499577	0.374482		0.319948	0.5223	0.999071	no	C5XLT0_SORBI Putative uncharacterized protein Sb03g002630 n=1 (Sorghum bicolor) Exp=6e-64; maizesequence.org: GO:0006355; regulation of transcription DNA-dependent | GO:0003700; transcription factor activity | GO:0003677; DNA binding
GRMZM2G359952	8:22983103-22992125	6.46921	6.93864	0.101063		0.248654	0.66495	0.999071	no	O24009_MAIZE AGAMOUS-like protein n=3 (Zea mays) Exp=3e-145; maizesequence.org: Uniprot/SPTREMBL:Q84V80; Putative MADS-domain transcription factor Fragment | Uniprot/SPTREMBL:Q41899; ZMM2 protein Fragment | Uniprot/SPTREMBL:O24009; AGAMOUS-like protein | Uniprot/SPTREMBL:B4FN46; Putative uncharacterized protein | UniGene:Zm.86224; Putative MADS-domain transcription factor (m2 gene) | UniGene:Zm.6…
GRMZM2G373928	8:25338662-25347940	175.389	160.131	-0.131306		-0.379912	0.51475	0.999071	no	C5XKG5_SORBI Putative uncharacterized protein Sb03g001700 n=1 (Sorghum bicolor) Exp=4e-98; maizesequence.org: EntrezGene:100127523; ZCN14 protein | GenBank:EU241929; product:ZCN14 | RefSeq_dna:NM_001112780; ZCN14 protein (ZCN14) mRNA | RefSeq_peptide:NP_001106251; ZCN14 protein | UniGene:Zm.103245; ZCN14 protein | Uniprot/SPTREMBL:A8WES5; Putative uncharacterized proteinZCN14 ;
GRMZM2G372928	8:25355865-25396510	4.0876	4.71697	0.206606		0.560921	0.3332	0.941991	no	C5XKF7_SORBI Putative uncharacterized protein Sb03g001640 n=1 (Sorghum bicolor) Exp=0; maizesequence.org: GO:0008270; zinc ion binding | GO:0005634; nucleus | GO:0005515; protein binding | GO:0005488; binding
GRMZM2G076705	8:29240263-29244579	50.4474	47.3673	-0.0908885		-0.274727	0.6333	0.999071	no	B6U784_MAIZE Nucleic acid binding protein n=1 (Zea mays) Exp=0; maizesequence.org: Uniprot/SPTREMBL:B6U784; Nucleic acid binding proteinPutative uncharacterized protein ; | UniGene:Zm.5626; Nucleic acid binding protein | RefSeq_peptide:NP_001151982; nucleic acid binding protein | RefSeq_dna:NM_001158510; nucleic acid binding protein (LOC100285619) mRNA | GO:0003723; RNA binding | EntrezGene:10028…
GRMZM2G044963	8:3573238-3577147	14.3398	16.1628	0.172652		0.4649	0.41965	0.986833	no	UPI0000DD8A7A Os01g0267900 n=1 (Oryza sativa subsp. japonica) Exp=1e-80; maizesequence.org: UniGene:Zm.72791; Calmodulin2 | Uniprot/SPTREMBL:B4FBW7; CalmodulinPutative uncharacterized protein ; | Uniprot/SPTREMBL:B4FQS6; Putative uncharacterized protein | Uniprot/SPTREMBL:B6T148; Calmodulin | Uniprot/SPTREMBL:D0F042; Calmodulin Fragment | Uniprot/SPTREMBL:Q43698; Calmodulin | RefSeq_peptide:NP_00…
GRMZM2G038152	8:36690395-36694616	0.160057	0.0844867	-0.92179		0	1	1	no	C4IZJ4_MAIZE Putative uncharacterized protein n=1 (Zea mays) Exp=0; maizesequence.org: Uniprot/SPTREMBL:C4IZJ4; Putative uncharacterized protein | UniGene:Zm.88724; Hypothetical protein LOC100384701 | UniGene:Zm.155635; Transcribed locus strongly similar to NP_001170647.1 hypothetical protein LOC100384701 [Zea mays] | RefSeq_peptide:NP_001170647; hypothetical protein LOC100384701 | RefSeq_dna:NM_…
GRMZM2G012601	8:44558470-44562682	8.2877	9.17009	0.145964		0.401687	0.48815	0.999071	no	B6SKS3_MAIZE SUMO protease n=2 (Zea mays) Exp=3e-173; maizesequence.org: UniGene:Zm.27265; SUMO protease | Uniprot/SPTREMBL:B6SKS3; SUMO protease | Uniprot/SPTREMBL:C0PGU7; Putative uncharacterized protein | RefSeq_peptide:NP_001147104; SUMO protease | RefSeq_dna:NM_001153632; SUMO protease (LOC100280713) mRNA | GO:0006508; proteolysis | EntrezGene:100280713; SUMO protease | GO:0008234; cysteine-…
GRMZM2G051790	8:51262577-51278992	11.7644	10.9612	-0.102022		-0.280396	0.6276	0.999071	no	B4FXL4_MAIZE Putative uncharacterized protein n=1 (Zea mays) Exp=5e-98; maizesequence.org: Uniprot/SPTREMBL:B4FXL4; Putative uncharacterized protein | UniGene:Zm.24219; Hypothetical protein LOC100273813 | RefSeq_peptide:NP_001141686; hypothetical protein LOC100273813 | RefSeq_dna:NM_001148214; hypothetical protein LOC100273813 (LOC100273813) mRNA | EntrezGene:100273813; hypothetical protein LOC10…
GRMZM2G159592	8:64222277-64223655	21.6948	11.8834	-0.868402		-2.41773	5e-05	0.00274723	yes	B4FXX4_MAIZE Putative uncharacterized protein n=1 (Zea mays) Exp=6e-130; maizesequence.org: GO:0006355; regulation of transcription DNA-dependent | GO:0003700; transcription factor activity | GO:0003677; DNA binding
GRMZM2G020291	8:71691763-71699759	11.793	10.884	-0.115722		-0.356369	0.5299	0.999071	no	C5YVZ7_SORBI Putative uncharacterized protein Sb09g029030 n=1 (Sorghum bicolor) Exp=0; maizesequence.org: UniGene:Zm.96314; Transcribed locus strongly similar to XP_002441541.1 hypothetical protein SORBIDRAFT_09g029030 [Sorghum bicolor] | UniGene:Zm.22484; Transcribed locus moderately similar to XP_002441541.1 hypothetical protein SORBIDRAFT_09g029030 [Sorghum bicolor] | UniGene:Zm.19638; Clone E…
GRMZM2G023872	8:72494684-72496501	0.139146	0.192606	0.469053		0	1	1	no	C0PIY6_MAIZE Putative uncharacterized protein n=1 (Zea mays) Exp=0; maizesequence.org: UniGene:Zm.13257; Scarecrow-like1 | UniGene:Zm.65424; Transcribed locus | Uniprot/SPTREMBL:C0PIY6; Putative uncharacterized protein | Uniprot/SPTREMBL:Q9ZTB1; Scl1 protein Fragment
GRMZM2G162413	8:75503581-75511105	13.8839	15.8242	0.18872		0.44687	0.434	0.99089	no	C5YWK7_SORBI Putative uncharacterized protein Sb09g030050 n=1 (Sorghum bicolor) Exp=0; maizesequence.org: Uniprot/SPTREMBL:B8A3F1; Putative uncharacterized protein | UniGene:Zm.81358; LOC100280367 | RefSeq_peptide:NP_001146765; hypothetical protein LOC100280367 | RefSeq_dna:NM_001153293; LOC100280367 (pco121700) mRNA | EntrezGene:100280367; LOC100280367
GRMZM2G002010	8:78348912-78349935	0.25	0.012719	-4.29687		0	1	1	no	B6SGL8_MAIZE Fb2 n=3 (Zea mays) Exp=2e-72
GRMZM2G125893	8:78588185-78592861	54.3385	65.0281	0.259089		0.439842	0.43715	0.992215	no	B6TKC5_MAIZE Nucleoside diphosphate kinase n=3 (Zea mays) Exp=4e-72; maizesequence.org: GO:0006241; CTP biosynthetic process | GO:0006228; UTP biosynthetic process | GO:0006183; GTP biosynthetic process | GO:0005524; ATP binding | GO:0004550; nucleoside diphosphate kinase activity
GRMZM2G035341	8:8102746-8115642	43.8816	44.1445	0.00861757		0.0256904	0.9659	0.999071	no	Q0JRD5_ORYSJ Os01g0106800 protein n=6 (Poaceae) Exp=4e-36
GRMZM2G055116	8:82372320-82380594	16.4946	14.7953	-0.156855		-0.448169	0.4393	0.992864	no	C0HGU1_MAIZE Putative uncharacterized protein n=1 (Zea mays) Exp=3e-167; maizesequence.org: Uniprot/SPTREMBL:C0HGU1; Putative uncharacterized protein | UniGene:Zm.8939; Hypothetical protein LOC100381535 | RefSeq_peptide:NP_001167835; hypothetical protein LOC100381535 | RefSeq_dna:NM_001174364; hypothetical protein LOC100381535 (LOC100381535) mRNA | EntrezGene:100381535; hypothetical protein LOC10…
GRMZM2G128809	8:84305482-84310669	2.3944	2.13308	-0.166726		-0.334991	0.55655	0.999071	no	C5YX95_SORBI Putative uncharacterized protein Sb09g018610 n=1 (Sorghum bicolor) Exp=5e-109; maizesequence.org: GO:0003676; nucleic acid binding | GO:0003723; RNA binding
GRMZM2G387528	8:935666-938714	18.2507	15.6063	-0.225823		-0.693459	0.22505	0.851147	no	C4J1T2_MAIZE Putative uncharacterized protein n=1 (Zea mays) Exp=0; maizesequence.org: RefSeq_dna:NM_001152939; hypothetical protein LOC100279991 (LOC100279991) mRNA | UniGene:Zm.153920; TSA: Zea mays contig35929 mRNA sequence
GRMZM2G074645	8:95285619-95290526	4.65269	4.12102	-0.175064		-0.433676	0.44685	0.995949	no	C0P859_MAIZE Putative uncharacterized protein n=1 (Zea mays) Exp=0; maizesequence.org: Uniprot/SPTREMBL:C0P859; Putative uncharacterized protein | UniGene:Zm.53149; Transcribed locus | UniGene:Zm.17496; Hypothetical protein LOC100382470 | RefSeq_peptide:NP_001168681; hypothetical protein LOC100382470 | RefSeq_dna:NM_001175210; hypothetical protein LOC100382470 (LOC100382470) mRNA | GO:0043565; se…
GRMZM2G360523	9:101990934-101999695	0.0269055	0.0348901	0.374917		0	1	1	no	C5Y5J4_SORBI Putative uncharacterized protein Sb05g004150 n=1 (Sorghum bicolor) Exp=0; maizesequence.org: GO:0000156; two-component response regulator activity | GO:0000160; two-component signal transduction system (phosphorelay) | GO:0006355; regulation of transcription DNA-dependent
GRMZM2G378653	9:102204170-102210509	0.750559	0.392759	-0.934321		-1.32857	0.02115	0.275545	no	B9FU49_ORYSJ Putative uncharacterized protein n=1 (Oryza sativa subsp. japonica) Exp=2e-101; maizesequence.org: Uniprot/SPTREMBL:B4FUE1; Putative uncharacterized protein | RefSeq_peptide:NP_001141213; hypothetical protein LOC100273300 | RefSeq_dna:NM_001147741; hypothetical protein LOC100273300 (LOC100273300) mRNA | GO:0045449; regulation of transcription | GO:0030528; transcription regulator act…
GRMZM2G010884	9:103446559-103448428	2441.17	2391.97	-0.0293735		-0.0335501	0.9512	0.999071	no	B6SUC4_MAIZE Chlorophyll a-b binding protein 8 n=1 (Zea mays) Exp=4e-146; maizesequence.org: Uniprot/SPTREMBL:B6T4Y7; Chlorophyll a-b binding protein 8 | Uniprot/SPTREMBL:B6SUC4; Chlorophyll a-b binding protein 8Putative uncharacterized protein ; | RefSeq_peptide:NP_001148598; chlorophyll a-b binding protein 8 | RefSeq_dna:NM_001155126; chlorophyll a-b binding protein 8 (LOC100282214) mRNA | GO:0…
GRMZM2G038783	9:108447973-108449794	846.799	636.761	-0.411268		-0.803432	0.1676	0.766762	no	B6SZG1_MAIZE CONSTANS-like protein CO6 n=2 (Andropogoneae) Exp=4e-153; maizesequence.org: Uniprot/SPTREMBL:B6SZG1; CONSTANS-like protein CO6 | UniGene:Zm.15291; CONSTANS-like protein CO6 | RefSeq_peptide:NP_001148229; CONSTANS-like protein CO6 | RefSeq_dna:NM_001154757; CONSTANS-like protein CO6 (LOC100281837) mRNA | GO:0008270; zinc ion binding | GO:0005622; intracellular | EntrezGene:100281837;…
GRMZM2G103897	9:109136463-109145498	48.8859	52.8223	0.111729		0.292531	0.6105	0.999071	no	C5Z7B4_SORBI Putative uncharacterized protein Sb10g026420 n=2 (Andropogoneae) Exp=0; maizesequence.org: Uniprot/SPTREMBL:B8A343; Putative uncharacterized protein | UniGene:Zm.41408; Hypothetical protein LOC100280309 | RefSeq_peptide:NP_001146707; hypothetical protein LOC100280309 | RefSeq_dna:NM_001153235; hypothetical protein LOC100280309 (LOC100280309) mRNA | GO:0006281; DNA repair | GO:0003913…
GRMZM2G124421	9:110475999-110480388	11.5823	12.3679	0.0946788		0.255685	0.6601	0.999071	no	B6TGA9_MAIZE Nuclear transcription factor Y subunit C-2 n=4 (Andropogoneae) Exp=4e-73; maizesequence.org: Uniprot/SPTREMBL:B4FLF9; Nuclear transcription factor Y subunit C-2Putative uncharacterized protein ; | UniGene:Zm.81008; Hypothetical protein LOC100217109 | RefSeq_peptide:NP_001136950; hypothetical protein LOC100217109 | RefSeq_dna:NM_001143478; hypothetical protein LOC100217109 (LOC1002171…
GRMZM2G170148	9:110859049-110870308	14.8327	16.4914	0.152933		0.366527	0.5284	0.999071	no	B4FU12_MAIZE DNA binding protein n=1 (Zea mays) Exp=5e-119; maizesequence.org: Uniprot/SPTREMBL:B4FU12; DNA binding proteinPutative uncharacterized protein ; | UniGene:Zm.119242; DNA binding protein | RefSeq_peptide:NP_001149370; DNA binding protein | RefSeq_dna:NM_001155898; DNA binding protein (LOC100282994) mRNA | GO:0003677; DNA binding | EntrezGene:100282994; DNA binding protein
GRMZM2G148216	9:114308517-114328529	12.2646	13.2301	0.109324		0.291451	0.62255	0.999071	no	B4FZQ7_MAIZE Putative uncharacterized protein n=1 (Zea mays) Exp=3e-117; maizesequence.org: GO:0005956; protein kinase CK2 complex | GO:0019887; protein kinase regulator activity | UniGene:Zm.145079; TSA: Zea mays contig50079 mRNA sequence
GRMZM2G119146	9:115351179-115354729	32.7132	29.0387	-0.171896		-0.535125	0.3505	0.95185	no	B6TJ76_MAIZE Nucleic acid binding protein n=4 (Andropogoneae) Exp=0; maizesequence.org: Uniprot/SPTREMBL:B6T6U2; Nucleic acid binding protein | UniGene:Zm.67810; Nucleic acid binding protein | UniGene:Zm.121837; Nucleic acid binding protein | RefSeq_peptide:NP_001148766; nucleic acid binding protein | RefSeq_dna:NM_001155294; nucleic acid binding protein (LOC100282383) mRNA | GO:0003723; RNA bind…
GRMZM2G126120	9:119190369-119195585	24.9356	23.9924	-0.0556294		-0.166361	0.7754	0.999071	no	C4J9J4_MAIZE Putative uncharacterized protein n=1 (Zea mays) Exp=0; maizesequence.org: GO:0003723; RNA binding | UniGene:Zm.122856; TSA: Zea mays contig52039 mRNA sequence | UniGene:Zm.125965; TSA: Zea mays contig24387 mRNA sequence | UniGene:Zm.98035; Hypothetical protein LOC100381617
GRMZM2G142999	9:125822460-125823598	0.225131	0.245807	0.126761		0.124655	0.81815	0.999071	no	C5WUE4_SORBI Putative uncharacterized protein Sb01g030520 n=1 (Sorghum bicolor) Exp=3e-107; maizesequence.org: UniGene:Zm.133432; Clone 400942 mRNA sequence | GO:0006355; regulation of transcription DNA-dependent | GO:0003677; DNA binding
GRMZM2G043955	9:130769034-130772972	10.8841	10.4505	-0.0586501		-0.15084	0.79115	0.999071	no	B6U742_MAIZE Photolyase/blue-light receptor PHR2 n=3 (Andropogoneae) Exp=0; maizesequence.org: GO:0003913; DNA photolyase activity | GO:0006281; DNA repair
GRMZM2G029107	9:134490908-134494910	40.6	40.4199	-0.00641397		-0.0197175	0.97215	0.999071	no	UPI0000DD8A7A Os01g0267900 n=1 (Oryza sativa subsp. japonica) Exp=1e-80; maizesequence.org: Uniprot/SPTREMBL:Q43698; Calmodulin | Uniprot/SPTREMBL:D0F042; Calmodulin Fragment | Uniprot/SPTREMBL:B6T148; Calmodulin | Uniprot/SPTREMBL:B4FQS6; Putative uncharacterized protein | Uniprot/SPTREMBL:B4FBW7; CalmodulinPutative uncharacterized protein ; | RefSeq_peptide:NP_001167666; calmodulin | RefSeq_pep…
GRMZM2G409974	9:13465292-13469635	3.23189	2.30289	-0.488933		-1.15394	0.0419	0.407167	no	C5Z5H6_SORBI Putative uncharacterized protein Sb10g005580 n=1 (Sorghum bicolor) Exp=0; maizesequence.org: Uniprot/SPTREMBL:B4FGJ3; Putative uncharacterized protein | Uniprot/SPTREMBL:B4F8Q7; Putative uncharacterized protein | UniGene:Zm.28823; Hypothetical protein LOC100191412 | RefSeq_peptide:NP_001130318; hypothetical protein LOC100191412 | RefSeq_dna:NM_001136846; hypothetical protein LOC10019…
GRMZM2G031447	9:141795428-141797022	1.52964	1.19536	-0.355747		-0.586939	0.3076	0.924229	no	B6THR7_MAIZE prMC3 n=3 (Andropogoneae) Exp=0; maizesequence.org: Uniprot/SPTREMBL:B6THR7; prMC3 | Uniprot/SPTREMBL:B4G0A2; Putative uncharacterized protein | UniGene:Zm.18594; LOC100283375 | RefSeq_peptide:NP_001149748; LOC100283375 | RefSeq_dna:NM_001156276; LOC100283375 (umc1794) mRNA | GO:0016787; hydrolase activity | GO:0008152; metabolic process | EntrezGene:100283375; LOC100283375
GRMZM2G156388	9:143459797-143464054	0.0259904	0.0261125	0.00676175		0	1	1	no	B6TV03_MAIZE RAB, member of RAS oncogene family-like 3 n=3 (Andropogoneae) Exp=2e-157; maizesequence.org: GO:0017111; nucleoside-triphosphatase activity | RefSeq_dna:NM_001157444; RAB member of RAS oncogene family-like 3 (LOC100284549) mRNA | RefSeq_peptide:NP_001150916; RAB member of RAS oncogene family-like 3 | UniGene:Zm.19329; RAB member of RAS oncogene family-like 3 | Uniprot/SPTREMBL:B4FJG7…
GRMZM2G407119	9:145064264-145067533	0.25	0.0081247	-4.94347		0	1	1	no	C5WRR7_SORBI Putative uncharacterized protein Sb01g042070 n=1 (Sorghum bicolor) Exp=2e-80; maizesequence.org: UniGene:Zm.125620; Clone 366523 mRNA sequence | GO:0045449; regulation of transcription | GO:0030528; transcription regulator activity | GO:0005634; nucleus
GRMZM2G021573	9:145136033-145140341	0.0164594	0.0104586	-0.654222		0	1	1	no	C5WRR9_SORBI Putative uncharacterized protein Sb01g042090 n=1 (Sorghum bicolor) Exp=0; maizesequence.org: Uniprot/SPTREMBL:C0PNW0; Putative uncharacterized protein | UniGene:Zm.33321; Transcribed locus moderately similar to XP_002468226.1 hypothetical protein SORBIDRAFT_01g042090 [Sorghum bicolor] | RefSeq_peptide:NP_001170394; hypothetical protein LOC100384380 | GO:0006355; regulation of transcr…
GRMZM2G126834	9:146136870-146143251	12.3293	12.0973	-0.0274058		-0.0818883	0.8886	0.999071	no	Q948L2_MAIZE Response regulator 10 n=4 (Andropogoneae) Exp=0; maizesequence.org: Uniprot/SPTREMBL:Q948L2; Response regulator 10 | Uniprot/SPTREMBL:C0HE02; Putative uncharacterized protein | UniGene:Zm.122773; Response regulator 10 | RefSeq_peptide:NP_001104864; response regulator 10 | RefSeq_dna:NM_001111394; response regulator 10 (RR10) mRNA | GO:0006355; regulation of transcription DNA-dependen…
GRMZM2G102161	9:146936741-146945281	3.29931	2.83581	-0.218403		-0.446644	0.4443	0.994414	no	C0PNL1_MAIZE Putative uncharacterized protein n=1 (Zea mays) Exp=2e-78; maizesequence.org: Uniprot/SPTREMBL:Q9ZR64; Putative MADS-domain transcription factor Fragment | Uniprot/SPTREMBL:D3YBA2; MADS-domain transcription factor | UniGene:Zm.13250; Zea mays MADS14 | UniGene:Zm.1104; Zea mays MADS8 | MaizeGDB_GenBank:Y09303; product:putative MADS-domain transcription factor | GO:0043565; sequence-sp…
AC149818.2_FG008	9:152726607-152728503	2.21061	2.86929	0.376249		0.767076	0.16945	0.770409	no	C5WXX2_SORBI Putative uncharacterized protein Sb01g047010 n=1 (Sorghum bicolor) Exp=0; maizesequence.org: GO:0005622; intracellular | GO:0008270; zinc ion binding
AC149475.2_FG005	9:152790981-152802457	6.37021	7.55598	0.246278		0.744766	0.2024	0.823243	no	C0HGZ4_MAIZE Putative uncharacterized protein n=1 (Zea mays) Exp=0; maizesequence.org: Uniprot/SPTREMBL:C0HGZ4; Putative uncharacterized protein | RefSeq_peptide:NP_001167851; hypothetical protein LOC100381553 | RefSeq_dna:NM_001174380; hypothetical protein LOC100381553 (LOC100381553) mRNA | GO:0008270; zinc ion binding | GO:0005622; intracellular | EntrezGene:100381553; hypothetical protein LOC1…
GRMZM2G109987	9:154910677-154920527	20.4675	21.533	0.0732144		0.193067	0.7436	0.999071	no	HOX10_ORYSJ Homeobox-leucine zipper protein HOX10 n=7 (Poaceae) Exp=0; maizesequence.org: Uniprot/SPTREMBL:B4FK18; Putative uncharacterized protein | GO:0043565; sequence-specific DNA binding | GO:0006355; regulation of transcription DNA-dependent | GO:0003700; transcription factor activity
GRMZM2G073982	9:20121732-20123748	0.25	0.0107024	-4.54592		0	1	1	no	C5Z3X0_SORBI Putative uncharacterized protein Sb10g003160 n=1 (Sorghum bicolor) Exp=4e-123; maizesequence.org: GO:0050826; response to freezing | GO:0050825; ice binding | GO:0042309; homoiothermy | GO:0006355; regulation of transcription DNA-dependent | GO:0003700; transcription factor activity | GO:0003677; DNA binding
GRMZM2G026833	9:2710391-2714128	59.2062	51.3994	-0.203997		-0.619519	0.28905	0.908555	no	Q52PH1_MAIZE Golden2-like transcription factor n=3 (Zea mays) Exp=0; maizesequence.org: Uniprot/SPTREMBL:B8A0X8; Putative uncharacterized protein
GRMZM2G172152	9:47500112-47508268	11.02	11.1595	0.0181482		0.0535556	0.9266	0.999071	no	C5Z2C5_SORBI Putative uncharacterized protein Sb10g013750 n=1 (Sorghum bicolor) Exp=0; maizesequence.org: Uniprot/SPTREMBL:C0PIW5; Putative uncharacterized protein | GO:0006281; DNA repair | GO:0003913; DNA photolyase activity
GRMZM2G140355	9:85129490-85133887	5.49702	10.7834	0.97209		1.52368	0.01015	0.174947	no	C5Z5L3_SORBI Putative uncharacterized protein Sb10g023420 n=1 (Sorghum bicolor) Exp=3e-40; maizesequence.org: GO:0050826; response to freezing | GO:0050825; ice binding | GO:0046983; protein dimerization activity | GO:0043565; sequence-specific DNA binding | GO:0042309; homoiothermy | GO:0006355; regulation of transcription DNA-dependent | GO:0005634; nucleus | GO:0003700; transcription factor ac…
GRMZM2G114672	9:87302708-87309214	20.8686	18.4405	-0.178456		-0.51516	0.3778	0.966904	no	B6U8G5_MAIZE Acyl-CoA binding protein n=3 (Andropogoneae) Exp=7e-58; maizesequence.org: UniGene:Zm.118941; Hypothetical protein LOC100273668 | RefSeq_peptide:NP_001141553; hypothetical protein LOC100273668 | RefSeq_dna:NM_001148081; hypothetical protein LOC100273668 (LOC100273668) mRNA
GRMZM2G416652	9:91044352-91053527	0.0102799	0.0170528	0.730182		0	1	1	no	B4FXU8_MAIZE Putative uncharacterized protein n=1 (Zea mays) Exp=4e-50; maizesequence.org: GO:0003677; DNA binding
GRMZM2G004090	9:91131736-91138554	0.9463	0.80231	-0.238138		-0.377623	0.5093	0.999071	no	C5Z5P1_SORBI Putative uncharacterized protein Sb10g023665 (Fragment) n=1 (Sorghum bicolor) Exp=1e-47; maizesequence.org: UniGene:Zm.124751; Clone 388684 mRNA sequence | GO:0003677; DNA binding
GRMZM2G042231	9:94358243-94388364	33.8628	35.1151	0.0523903		0.106347	0.83615	0.999071	no	C5Z6R1_SORBI Putative uncharacterized protein Sb10g025390 n=1 (Sorghum bicolor) Exp=0; maizesequence.org: UniGene:Zm.13552; TSA: Zea mays contig16407 mRNA sequence | UniGene:Zm.147343; TSA: Zea mays contig26619 mRNA sequence | UniGene:Zm.17986; Clone 394948 mRNA sequence
GRMZM2G009189	10:103379778-103380665	9.355	5.74478	-0.703486		-1.43926	0.0123	0.196984	no	B6SXE5_MAIZE Flowering promoting factor-like 1 n=2 (Andropogoneae) Exp=2e-38; maizesequence.org: UniGene:Zm.32249; Hypothetical protein LOC100381844 | RefSeq_peptide:NP_001168106; hypothetical protein LOC100381844 | RefSeq_dna:NM_001174635; hypothetical protein LOC100381844 (LOC100381844) mRNA
GRMZM2G175549	10:116635220-116638488	13.8377	14.174	0.0346428		0.0877466	0.8796	0.999071	no	B6SQ52_MAIZE COP9 signalosome complex subunit 8 n=3 (Andropogoneae) Exp=2e-110; maizesequence.org: Uniprot/SPTREMBL:B6SQ52; COP9 signalosome complex subunit 8 | UniGene:Zm.118346; COP9 signalosome complex subunit 8 | RefSeq_peptide:NP_001147342; COP9 signalosome complex subunit 8 | RefSeq_dna:NM_001153870; COP9 signalosome complex subunit 8 (LOC100280950) mRNA | EntrezGene:100280950; COP9 signalo…
GRMZM2G078641	10:123126088-123136710	231.718	183.204	-0.338919		-0.884894	0.1211	0.67702	no	14332_ORYSJ 14-3-3-like protein GF14-B n=10 (Poaceae) Exp=7e-139; maizesequence.org: Uniprot/SWISSPROT:Q01526; 14-3-3-like protein GF14-12 | Uniprot/SPTREMBL:Q9S9H1; FUSICOCCIN receptor 30 kDa protein Fragments | UniGene:Zm.93597; General regulatory factor2 | UniGene:Zm.141585; TSA: Zea mays contig60727 mRNA sequence | RefSeq_peptide:NP_001160169; 14-3-3-like protein GF14-12 | RefSeq_dna:NM_00116…
GRMZM2G025054	10:125323531-125327383	11.6818	12.0982	0.0505298		0.145461	0.80415	0.999071	no	B6U0E3_MAIZE Transglutaminase n=3 (Zea mays) Exp=2e-107; maizesequence.org: Uniprot/SPTREMBL:C0P655; Putative uncharacterized protein | Uniprot/SPTREMBL:C0HGH1; Putative uncharacterized protein | Uniprot/SPTREMBL:B6U0E3; Transglutaminase | RefSeq_peptide:NP_001151424; transglutaminase | RefSeq_dna:NM_001157952; transglutaminase (LOC100285057) mRNA | GO:0050826; response to freezing | GO:0050825; …
GRMZM2G058573	10:125923936-125956137	32.8508	33.4628	0.0266297		0.0727172	0.8993	0.999071	no	Q94F80_MAIZE Putative uncharacterized protein n=1 (Zea mays) Exp=8e-151; maizesequence.org: GO:0070403; NAD binding | GO:0045449; regulation of transcription | GO:0016811; hydrolase activity acting on carbon-nitrogen (but not peptide) bonds in linear amides | GO:0008270; zinc ion binding | GO:0006476; protein amino acid deacetylation | GO:0006342; chromatin silencing
GRMZM2G062052	10:126937359-126941217	0.0108336	0.0130702	0.270768		0	1	1	no	Q7XUF1_ORYSJ Os04g0488400 protein n=5 (Poaceae) Exp=1e-92; maizesequence.org: Uniprot/SPTREMBL:A8WET0; ZCN19 | UniGene:Zm.103275; ZCN19 protein | RefSeq_peptide:NP_001106256; ZCN19 protein | RefSeq_dna:NM_001112785; ZCN19 protein (ZCN19) mRNA | GenBank:EU241934; product:ZCN19 | EntrezGene:100127528; ZCN19 protein
GRMZM2G013619	10:128886847-128890226	81.2821	71.8046	-0.178861		-0.543049	0.3375	0.944521	no	B6U4M0_MAIZE Polyadenylate-binding protein 2 n=2 (Andropogoneae) Exp=0; maizesequence.org: GO:0003676; nucleic acid binding | GO:0003723; RNA binding
GRMZM2G061499	10:130721053-130722834	0.25	0.00908099	-4.78293		0	1	1	no	C5YC33_SORBI Putative uncharacterized protein Sb06g022610 n=2 (Andropogoneae) Exp=2e-65; maizesequence.org: EntrezGene:100192901; hypothetical protein LOC100192901 | RefSeq_peptide:NP_001131560; hypothetical protein LOC100192901 | Uniprot/SPTREMBL:B4FD19; Putative uncharacterized protein
GRMZM2G181030	10:134853485-134857714	1.11226	0.914718	-0.282095		-0.256732	0.65325	0.999071	no	B4FVU9_MAIZE Putative uncharacterized protein n=1 (Zea mays) Exp=0; maizesequence.org: Uniprot/SPTREMBL:B4FVU9; Putative uncharacterized protein | UniGene:Zm.80399; Hypothetical protein LOC100273483 | RefSeq_peptide:NP_001141392; hypothetical protein LOC100273483 | RefSeq_dna:NM_001147920; hypothetical protein LOC100273483 (LOC100273483) mRNA | GO:0003677; DNA binding | EntrezGene:100273483; hypo…
AC235534.1_FG007	10:136957426-136964001	0.00259191	0.0223182	3.10613		0	1	1	no	Q9LEE9_MAIZE OCL2 protein (Fragment) n=1 (Zea mays) Exp=0; maizesequence.org: GO:0043565; sequence-specific DNA binding | GO:0030528; transcription regulator activity | GO:0006355; regulation of transcription DNA-dependent | GO:0005634; nucleus | GO:0003700; transcription factor activity
AC235534.1_FG007	10:136957426-136964001	0.00259191	0.0223182	3.10613		0	1	1	no	Q9LEE9_MAIZE OCL2 protein (Fragment) n=1 (Zea mays) Exp=0; maizesequence.org: GO:0043565; sequence-specific DNA binding | GO:0030528; transcription regulator activity | GO:0006355; regulation of transcription DNA-dependent | GO:0005634; nucleus | GO:0003700; transcription factor activity
GRMZM2G010290	10:137229761-137232301	2.29148	2.53818	0.147515		0.272415	0.63175	0.999071	no	B6TKH8_MAIZE Dof zinc finger protein n=2 (Andropogoneae) Exp=5e-94; maizesequence.org: GO:0050826; response to freezing | GO:0050825; ice binding | GO:0045449; regulation of transcription | GO:0042309; homoiothermy | GO:0008270; zinc ion binding | GO:0005737; cytoplasm | GO:0005525; GTP binding | GO:0003677; DNA binding
GRMZM2G037792	10:138720418-138723128	14.4265	13.6662	-0.0781092		-0.233882	0.6839	0.999071	no	C5YDJ7_SORBI Putative uncharacterized protein Sb06g024820 n=3 (Andropogoneae) Exp=0; maizesequence.org: EntrezGene:100381701; hypothetical protein LOC100381701 | RefSeq_dna:NM_001174511; hypothetical protein LOC100381701 (LOC100381701) mRNA | RefSeq_peptide:NP_001167982; hypothetical protein LOC100381701 | UniGene:Zm.79493; Hypothetical protein LOC100381701 | Uniprot/SPTREMBL:C0HI72; Putative unc…
GRMZM2G148467	10:139106685-139109641	0.00489058	0.0100829	1.04383		0	1	1	no	C5YDH8_SORBI Putative uncharacterized protein Sb06g024630 n=1 (Sorghum bicolor) Exp=2e-93; maizesequence.org: UniGene:Zm.34902; Hypothetical protein LOC100304183 | UniGene:Zm.155857; Clone 280651 mRNA sequence | RefSeq_peptide:NP_001159110; hypothetical protein LOC100304183 | RefSeq_dna:NM_001165638; hypothetical protein LOC100304183 (LOC100304183) mRNA | GO:0005634; nucleus | GO:0003677; DNA bin…
GRMZM2G311059	10:139262187-139263199	0.0102179	0.107775	3.39885		0	1	1	no	C5YDG5_SORBI Putative uncharacterized protein Sb06g024510 n=1 (Sorghum bicolor) Exp=2e-61; maizesequence.org: Uniprot/SPTREMBL:Q9SQA8; R2R3MYB-domain protein Fragment | UniGene:Zm.13880; R2R3MYB-domain protein | GO:0003677; DNA binding
GRMZM2G098813	10:140276802-140279827	0.0361181	0.0311224	-0.214769		0	1	1	no	C5YF44_SORBI Putative uncharacterized protein Sb06g027340 n=1 (Sorghum bicolor) Exp=1e-102; maizesequence.org: Uniprot/SPTREMBL:Q84QG8; Floricaula/leafy-like 1 | Uniprot/SPTREMBL:Q84QG7; Floricaula/leafy-like 1 Fragment | Uniprot/SPTREMBL:Q58WN8; FL1 Fragment | Uniprot/SPTREMBL:Q2L9Y2; LEAFY-like | RefSeq_peptide:NP_001105201; zea floricaula/leafy1 | GO:0045449; regulation of transcription | GO:0…
GRMZM2G042920	10:142141639-142143666	0.142281	0.111498	-0.351725		0	1	1	no	B6SK98_MAIZE Protein SPATULA n=2 (Zea mays) Exp=3e-77; maizesequence.org: UniGene:Zm.137576; Hypothetical protein LOC100272925 | RefSeq_dna:NM_001147377; hypothetical protein LOC100272925 (LOC100272925) mRNA | GO:0045449; regulation of transcription | GO:0030528; transcription regulator activity | GO:0005634; nucleus
GRMZM2G396856	10:142484990-142490265	4.44593	4.71402	0.0844726		0.218388	0.69965	0.999071	no	Q7X809_ORYSJ Os04g0623300 protein n=5 (Poaceae) Exp=0; maizesequence.org: UniGene:Zm.125074; TSA: Zea mays contig42655 mRNA sequence | GO:0055114; oxidation reduction | GO:0016491; oxidoreductase activity | GO:0009055; electron carrier activity
GRMZM2G122897	10:142812772-142821644	7.89877	7.24083	-0.125473		-0.365481	0.528	0.999071	no	Q9LEE6_MAIZE OCL5 protein n=4 (Andropogoneae) Exp=0; maizesequence.org: Uniprot/SPTREMBL:C0PG40; Putative uncharacterized protein | UniGene:Zm.37420; Hypothetical protein LOC100383453 | RefSeq_peptide:NP_001169573; hypothetical protein LOC100383453 | RefSeq_dna:NM_001176102; hypothetical protein LOC100383453 (LOC100383453) mRNA | GO:0043565; sequence-specific DNA binding | GO:0030528; transcripti…
GRMZM2G058588	10:145726894-145730461	0.104936	0.0845323	-0.311935		0	1	1	no	C5Y9I5_SORBI Putative uncharacterized protein Sb06g031290 n=1 (Sorghum bicolor) Exp=1e-143; maizesequence.org: GO:0005634; nucleus | GO:0003677; DNA binding
GRMZM2G092427	10:147325723-147327040	384.639	410.413	0.0935714		0.211674	0.71545	0.999071	no	Q7XV11_ORYSJ Os04g0457000 protein n=5 (Poaceae) Exp=2e-116; maizesequence.org: Uniprot/SPTREMBL:B4F9J6; Putative uncharacterized protein | Uniprot/SPTREMBL:B6TRW9; Putative uncharacterized protein
GRMZM2G137510	10:17785900-17791457	0.0054466	0.00518334	-0.0714739		0	1	1	no	B6UCV2_MAIZE MADS-box transcription factor 14 n=2 (Zea mays) Exp=2e-111; maizesequence.org: Uniprot/SPTREMBL:B6UCV2; MADS-box transcription factor 14 | RefSeq_peptide:NP_001152356; MADS-box transcription factor 14 | RefSeq_dna:NM_001158884; MADS-box transcription factor 14 (LOC100285996) mRNA | GO:0043565; sequence-specific DNA binding | GO:0006355; regulation of transcription DNA-dependent | GO:…
AC198366.3_FG004	10:1890880-1892401	0.715038	0.542799	-0.397602		-0.567382	0.322	0.93379	no	C5YQJ1_SORBI Putative uncharacterized protein Sb08g001190 n=1 (Sorghum bicolor) Exp=0
GRMZM2G431157	10:19854630-19862480	3.03575	3.8612	0.346996		0.93151	0.10655	0.642326	no	Q2QTX9_ORYSJ Os12g0279100 protein n=3 (Oryza sativa) Exp=0; maizesequence.org: GO:0005622; intracellular | GO:0008270; zinc ion binding | UniGene:Zm.22238; Clone 322288 mRNA sequence
GRMZM2G103909	10:22133368-22140730	7.0509	7.35776	0.0614592		0.155419	0.78555	0.999071	no	C0P4E3_MAIZE Putative uncharacterized protein n=1 (Zea mays) Exp=4e-107; maizesequence.org: Uniprot/SPTREMBL:C0P4E3; Putative uncharacterized protein | Uniprot/SPTREMBL:B6TQ58; Fiber protein Fb2 | UniGene:Zm.85270; Fiber protein Fb2 | RefSeq_peptide:NP_001150479; fiber protein Fb2 | RefSeq_dna:NM_001157007; fiber protein Fb2 (LOC100284110) mRNA | EntrezGene:100284110; fiber protein Fb2
GRMZM2G013478	10:23254224-23259866	18.2283	18.2275	-6.33181e-05		-0.000167455	0.9988	0.999733	no	C5YPK6_SORBI Nucleoside diphosphate kinase n=3 (Andropogoneae) Exp=1e-91; maizesequence.org: Uniprot/SPTREMBL:C4P9N2; Nucleoside diphosphate kinase II Fragment | Uniprot/SPTREMBL:B6TLW2; Nucleoside diphosphate kinase (EC 2.7.4.6) | Uniprot/SPTREMBL:B4G0R1; Nucleoside diphosphate kinase (EC 2.7.4.6) | UniGene:Zm.35855; Transcribed locus moderately similar to XP_002442297.1 hypothetical protein SOR…
GRMZM2G174830	10:24971563-24977247	1.52396	1.76143	0.208922		0.437637	0.4475	0.995949	no	B8A0C5_MAIZE Putative uncharacterized protein n=1 (Zea mays) Exp=0; maizesequence.org: GO:0005515; protein binding
GRMZM2G130724	10:26353477-26366269	8.99266	8.63186	-0.0590765		-0.170725	0.76655	0.999071	no	C5YPA1_SORBI Putative uncharacterized protein Sb08g016860 n=3 (Andropogoneae) Exp=0; maizesequence.org: EntrezGene:100280056; hypothetical protein LOC100280056 | RefSeq_dna:NM_001152996; hypothetical protein LOC100280056 (LOC100280056) mRNA | RefSeq_peptide:NP_001146468; hypothetical protein LOC100280056 | Uniprot/SPTREMBL:B8A1M9; Putative uncharacterized protein
GRMZM2G088487	10:39599953-39603665	10.6079	10.938	0.0442099		0.122463	0.8297	0.999071	no	B6TWX2_MAIZE Actin-like protein arp6 n=2 (Andropogoneae) Exp=2e-126; maizesequence.org: GO:0005515; protein binding
GRMZM2G473138	10:4018762-4022973	10.6697	10.4663	-0.0277681		-0.0823209	0.8892	0.999071	no	C5YRA3_SORBI Putative uncharacterized protein Sb08g002530 n=1 (Sorghum bicolor) Exp=0; maizesequence.org: UniGene:Zm.151871; TSA: Zea mays contig05508 mRNA sequence | UniGene:Zm.132945; Clone 619125 mRNA sequence | UniGene:Zm.110765; Transcribed locus
GRMZM2G405170	10:44129683-44130359	0.122202	0.134549	0.138864		0	1	1	no	C5Z276_SORBI Putative uncharacterized protein Sb10g000780 n=1 (Sorghum bicolor) Exp=3e-55; maizesequence.org: GO:0006355; regulation of transcription DNA-dependent | GO:0003677; DNA binding
GRMZM2G338454	10:5465314-5465881	0.0721577	0.0419735	-0.781675		0	1	1	no	Q53Q71_ORYSJ CEN-like protein 2, putative, expressed n=13 (Poaceae) Exp=2e-53
GRMZM2G118063	10:58000725-58009266	3.06894	2.88529	-0.0890241		-0.222859	0.6988	0.999071	no	Q9LEE6_MAIZE OCL5 protein n=4 (Andropogoneae) Exp=0; maizesequence.org: Uniprot/SPTREMBL:B7ZX75; Putative uncharacterized protein | Uniprot/SPTREMBL:B6UAR0; Putative uncharacterized protein | Uniprot/SPTREMBL:B4FYA9; Putative uncharacterized protein | UniGene:Zm.28644; Hypothetical protein LOC100279257 | UniGene:Zm.155230; TSA: Zea mays contig30266 mRNA sequence | RefSeq_peptide:NP_001145750; hyp…
GRMZM2G012761	10:58193755-58208233	4.95812	5.57384	0.168878		0.448474	0.44205	0.992913	no	C5YI06_SORBI Putative uncharacterized protein Sb07g005190 n=1 (Sorghum bicolor) Exp=0; maizesequence.org: UniGene:Zm.142389; Clone 406785 mRNA sequence
GRMZM2G143568	10:61390269-61396404	22.2626	24.2018	0.120492		0.375546	0.51835	0.999071	no	C5YIF0_SORBI Putative uncharacterized protein Sb07g005630 n=1 (Sorghum bicolor) Exp=0; maizesequence.org: Uniprot/SPTREMBL:C4IY65; Putative uncharacterized protein | UniGene:Zm.84039; Hypothetical protein LOC100384498 | UniGene:Zm.150234; TSA: Zea mays contig13253 mRNA sequence | UniGene:Zm.123344; TSA: Zea mays contig63373 mRNA sequence | RefSeq_peptide:NP_001170496; hypothetical protein LOC1003…
GRMZM2G034152	10:62260919-62265303	22.5876	15.1389	-0.577271		-1.55953	0.005	0.108011	no	PAO_MAIZE Polyamine oxidase n=3 (Zea mays) Exp=0; maizesequence.org: UniGene:Zm.136604; Clone 1538519 mRNA sequence | UniGene:Zm.154876; TSA: Zea mays contig31775 mRNA sequence | UniGene:Zm.300; Polyamine oxidase1 | Uniprot/SPTREMBL:Q546R6; Flavin containing polyamine oxidasePolyamine oxidase Precursor ; | Uniprot/SPTREMBL:Q9FXZ9; Polyamine oxidase Precursor | Uniprot/SWISSPROT:O64411; Polyamine …
GRMZM2G046861	10:65004377-65013655	1.2204	1.07354	-0.184978		-0.350919	0.54285	0.999071	no	C0HEQ7_MAIZE Putative uncharacterized protein n=2 (Zea mays) Exp=0; maizesequence.org: Uniprot/SPTREMBL:C0HEQ7; Putative uncharacterized protein | Uniprot/SPTREMBL:B6SH64; Putative uncharacterized protein | UniGene:Zm.6615; LOC100274676 | RefSeq_peptide:NP_001142468; hypothetical protein LOC100274676 | RefSeq_dna:NM_001148996; LOC100274676 (IDP48) mRNA | MaizeGDB_GenBank:AY112415; | EntrezGene:10…
GRMZM2G121096	10:67944843-67951869	28.434	29.5351	0.0548134		0.169608	0.7653	0.999071	no	C5YJ28_SORBI Putative uncharacterized protein Sb07g006910 n=1 (Sorghum bicolor) Exp=0; maizesequence.org: GO:0005515; protein binding | UniGene:Zm.140307; Transcribed locus moderately similar to XP_002445255.1 hypothetical protein SORBIDRAFT_07g006910 [Sorghum bicolor] | UniGene:Zm.39630; TSA: Zea mays contig20956 mRNA sequence
GRMZM2G027750	10:72990116-72998734	5.46274	5.87853	0.105831		0.184486	0.7441	0.999071	no	C5YHJ0_SORBI Putative uncharacterized protein Sb07g004560 n=1 (Sorghum bicolor) Exp=0; maizesequence.org: Uniprot/SPTREMBL:C0PMD5; Putative uncharacterized protein | UniGene:Zm.143254; TSA: Zea mays contig64023 mRNA sequence | RefSeq_peptide:NP_001170242; hypothetical protein LOC100384196 | GO:0031625; ubiquitin protein ligase binding | GO:0031461; cullin-RING ubiquitin ligase complex | GO:000651…
GRMZM2G022359	10:73140438-73143884	14.9303	14.2499	-0.0672914		-0.186007	0.74295	0.999071	no	Q2TQ33_ORYSJ Transcription factor AP2D9 n=3 (Oryza sativa) Exp=4e-99; maizesequence.org: GO:0003677; DNA binding | GO:0003700; transcription factor activity | GO:0006355; regulation of transcription DNA-dependent
GRMZM2G474769	10:78331110-78392690	797.42	941.413	0.239488		0.260238	0.55545	0.999071	no	B6SPA3_MAIZE LHY protein n=1 (Zea mays) Exp=0; maizesequence.org: Uniprot/SPTREMBL:B6SPA3; LHY protein | Uniprot/SPTREMBL:B4FCX6; Putative uncharacterized protein | UniGene:Zm.118069; LHY protein | RefSeq_peptide:NP_001131529; LHY protein | RefSeq_dna:NM_001138057; LHY protein (LOC100192868) mRNA | EntrezGene:100192868; LHY protein
GRMZM2G149786	10:82218459-82222873	0.541333	0.56844	0.0704917		0.110784	0.84645	0.999071	no	C5YN37_SORBI Putative uncharacterized protein Sb07g003130 n=1 (Sorghum bicolor) Exp=0; maizesequence.org: UniGene:Zm.28937; TSA: Zea mays contig32431 mRNA sequence | UniGene:Zm.153529; TSA: Zea mays contig37971 mRNA sequence | UniGene:Zm.126562; Transcribed locus moderately similar to NP_001060976.1 Os08g0143400 [Oryza sativa Japonica Group] | GO:0055114; oxidation reduction | GO:0016491; oxidore…
GRMZM2G005126	10:84252044-84259713	16.7165	19.2319	0.202228		0.507358	0.36135	0.957333	no	C5YMZ5_SORBI Putative uncharacterized protein Sb07g002750 n=1 (Sorghum bicolor) Exp=0; maizesequence.org: GO:0003676; nucleic acid binding | GO:0008270; zinc ion binding | UniGene:Zm.126982; Transcribed locus moderately similar to XP_002443818.1 hypothetical protein SORBIDRAFT_07g002750 [Sorghum bicolor]
GRMZM2G339820	10:89509359-89514252	9.00008	8.47803	-0.0862088		-0.24818	0.6712	0.999071	no	C5Z008_SORBI Putative uncharacterized protein Sb09g003500 n=1 (Sorghum bicolor) Exp=0; maizesequence.org: UniGene:Zm.26880; TSA: Zea mays contig09947 mRNA sequence
GRMZM2G166694	10:90490571-90506850	52.3484	55.7903	0.0918689		0.255624	0.65885	0.999071	no	Q5ZC88_ORYSJ Os01g0369000 protein n=8 (Poaceae) Exp=0; maizesequence.org: UniGene:Zm.74901; Full-length cDNA clone ZM_BFb0168K04 | GO:0031625; ubiquitin protein ligase binding | GO:0031461; cullin-RING ubiquitin ligase complex | GO:0006511; ubiquitin-dependent protein catabolic process
GRMZM2G043484										EZ3_MAIZE Histone-lysine N-methyltransferase EZ3 n=3 (Andropogoneae) Exp=0; maizesequence.org: Uniprot/SWISSPROT:Q8S4P4; Histone-lysine N-methyltransferase EZ3 (EC 2.1.1.43)(Enhancer of zeste protein 3) | Uniprot/SPTREMBL:C0HHT4; Putative uncharacterized protein | UniGene:Zm.10341; Enhancer of zeste3 | RefSeq_peptide:NP_001105079; histone-lysine N-methyltransferase EZ3 | RefSeq_dna:NM_001111609; …
GRMZM2G106099										C0PK64_MAIZE Nucleoside diphosphate kinase n=2 (Poaceae) Exp=4e-70; maizesequence.org: GO:0006355; regulation of transcription DNA-dependent | GO:0006241; CTP biosynthetic process | GO:0006228; UTP biosynthetic process | GO:0006183; GTP biosynthetic process | GO:0005634; nucleus | GO:0005524; ATP binding | GO:0004879; ligand-dependent nuclear receptor activity | GO:0004550; nucleoside diphosphate…
GRMZM2G056186										C5XL80_SORBI Putative uncharacterized protein Sb03g002500 n=1 (Sorghum bicolor) Exp=7e-34
GRMZM2G061515										C5XLS5_SORBI Putative uncharacterized protein Sb03g036680 n=1 (Sorghum bicolor) Exp=0; maizesequence.org: UniGene:Zm.125732; Clone 1549965 mRNA sequence
GRMZM2G004703										UPI0000DD8A7A Os01g0267900 n=1 (Oryza sativa subsp. japonica) Exp=3e-80; maizesequence.org: RefSeq_peptide:NP_001105490; calmodulin | UniGene:Zm.156222; Transcribed locus strongly similar to XP_002488928.1 hypothetical protein SORBIDRAFT_1599s002010 [Sorghum bicolor] | UniGene:Zm.352; Calmodulin | Uniprot/SPTREMBL:D0F042; Calmodulin Fragment | Uniprot/SPTREMBL:O22641; Calmodulin | Uniprot/SPTREMB…
GRMZM2G366873										C5Z0F7_SORBI Putative uncharacterized protein Sb09g024710 n=2 (Andropogoneae) Exp=0; maizesequence.org: Uniprot/SPTREMBL:B8A314; Putative uncharacterized protein | Uniprot/SPTREMBL:B7ZX80; Putative uncharacterized protein | UniGene:Zm.33970; Hypothetical protein LOC100280297 | RefSeq_peptide:NP_001146696; hypothetical protein LOC100280297 | RefSeq_dna:NM_001153224; hypothetical protein LOC1002802…
vgt1
GRMZM2G065538										B6TX04_MAIZE DNA-binding protein RAV1 n=1 (Zea mays) Exp=2e-79; maizesequence.org: GO:0006355; regulation of transcription DNA-dependent | GO:0005634; nucleus | GO:0004879; ligand-dependent nuclear receptor activity | GO:0003677; DNA binding
GRMZM2G052499										C5YS68_SORBI Putative uncharacterized protein Sb08g003700 n=1 (Sorghum bicolor) Exp=2e-154; maizesequence.org: GO:0003677; DNA binding
AC201832.3_FG006										B6TRK1_MAIZE Dr1-associated corepressor n=2 (Zea mays) Exp=6e-31; maizesequence.org: GO:0003677; DNA binding
AC201832.3_FG006										B6TRK1_MAIZE Dr1-associated corepressor n=2 (Zea mays) Exp=6e-31; maizesequence.org: GO:0003677; DNA binding
GRMZM2G479610										B6SZS1_MAIZE Nuclear transcription factor Y subunit C-9 n=1 (Zea mays) Exp=2e-46; maizesequence.org: GO:0043565; sequence-specific DNA binding | GO:0005622; intracellular | GO:0003677; DNA binding
GRMZM2G124663										Q94EJ7_MAIZE Leafy cotyledon1 n=2 (Zea mays) Exp=5e-78; maizesequence.org: UniGene:Zm.19658; Clone EL01N0439A08.c mRNA sequence | GO:0043565; sequence-specific DNA binding | GO:0006355; regulation of transcription DNA-dependent | GO:0006334; nucleosome assembly | GO:0005634; nucleus | GO:0005622; intracellular | GO:0003677; DNA binding | GO:0000786; nucleosome
GRMZM2G028151										C5WZ80_SORBI Putative uncharacterized protein Sb01g006830 n=1 (Sorghum bicolor) Exp=1e-178; maizesequence.org: Uniprot/SPTREMBL:B4FLJ5; Putative uncharacterized protein | RefSeq_peptide:NP_001136969; hypothetical protein LOC100217129 | GO:0006355; regulation of transcription DNA-dependent | GO:0003700; transcription factor activity | GO:0003677; DNA binding | EntrezGene:100217129; hypothetical pr…
GRMZM2G118205										FIE1_MAIZE Polycomb group protein FIE1 n=3 (Zea mays) Exp=0; maizesequence.org: EntrezGene:542075; fertilization independent endosperm1 | Uniprot/SWISSPROT:Q8VZY7; Polycomb group protein FIE1 (Protein FERTILIZATION-INDEPENDENT ENDOSPERM 1) | Uniprot/SPTREMBL:Q6XZP5; Fertilization-independent type 2 | Uniprot/SPTREMBL:Q6J9W1; FIE1Putative uncharacterized protein ; | UniGene:Zm.4373; Fertilization …
GRMZM2G091656										C5Y560_SORBI Putative uncharacterized protein Sb05g003820 n=1 (Sorghum bicolor) Exp=0; maizesequence.org: UniGene:Zm.132894; Clone 367514 mRNA sequence
GRMZM2G102499										14332_ORYSJ 14-3-3-like protein GF14-B n=10 (Poaceae) Exp=4e-139; maizesequence.org: GO:0019904; protein domain specific binding | Uniprot/SPTREMBL:Q9S9H1; FUSICOCCIN receptor 30 kDa protein Fragments
GRMZM2G137387										B6TW19_MAIZE MADS-box transcription factor 31 n=3 (Andropogoneae) Exp=4e-81; maizesequence.org: GO:0003700; transcription factor activity | GO:0005634; nucleus | GO:0006355; regulation of transcription DNA-dependent | GO:0043565; sequence-specific DNA binding
GRMZM2G018589										Q84V73_MAIZE M25 protein (Fragment) n=3 (Andropogoneae) Exp=9e-107; maizesequence.org: Uniprot/SPTREMBL:Q84V73; M25 protein Fragment | Uniprot/SPTREMBL:C0HIF4; Putative uncharacterized protein | UniGene:Zm.14825; M25 protein | GO:0043565; sequence-specific DNA binding | GO:0016021; integral to membrane | GO:0006816; calcium ion transport | GO:0006355; regulation of transcription DNA-dependent | G…
GRMZM2G046443										C5YIL5_SORBI Putative uncharacterized protein Sb07g027160 n=1 (Sorghum bicolor) Exp=1e-60; maizesequence.org: GO:0003677; DNA binding
GRMZM2G059358										A8WES1_MAIZE ZCN9 n=6 (Andropogoneae) Exp=2e-73; maizesequence.org: Uniprot/SPTREMBL:B6SNN5; MFT2-Corn MFT-like protein | Uniprot/SPTREMBL:A8WES2; MFT2-Corn MFT-like proteinZCN10 ; | UniGene:Zm.136615; MFT2 - Corn MFT-like protein | UniGene:Zm.103232; ZCN10 protein | RefSeq_peptide:NP_001147266; MFT2 - Corn MFT-like protein | RefSeq_peptide:NP_001106249; ZCN10 protein | RefSeq_dna:NM_001153794; M…
GRMZM2G152689										A8WES1_MAIZE ZCN9 n=6 (Andropogoneae) Exp=2e-73; maizesequence.org: Uniprot/SPTREMBL:B6SNN5; MFT2-Corn MFT-like protein | Uniprot/SPTREMBL:A8WES2; MFT2-Corn MFT-like proteinZCN10 ; | UniGene:Zm.136615; MFT2 - Corn MFT-like protein | UniGene:Zm.103232; ZCN10 protein | RefSeq_peptide:NP_001147266; MFT2 - Corn MFT-like protein | RefSeq_peptide:NP_001106249; ZCN10 protein | RefSeq_dna:NM_001153794; M…
GRMZM2G400167										A8WET3_MAIZE ZCN26 n=2 (Andropogoneae) Exp=5e-96; maizesequence.org: Uniprot/SPTREMBL:A8WET3; ZCN26 | UniGene:Zm.103216; LOC100127539 | RefSeq_peptide:NP_001106265; LOC100127539 | RefSeq_dna:NM_001112794; LOC100127539 (gpm849) mRNA | GenBank:EU241937; product:ZCN26 | EntrezGene:100127539; LOC100127539
GRMZM2G381691										C5YBK2_SORBI Putative uncharacterized protein Sb06g000570 n=1 (Sorghum bicolor) Exp=7e-62
GRMZM2G107395										B6TJV4_MAIZE 14-3-3-like protein A n=1 (Zea mays) Exp=3e-53; maizesequence.org: GO:0019904; protein domain specific binding
GRMZM2G440543										B6SU06_MAIZE F-box protein GID2 n=1 (Zea mays) Exp=1e-20; maizesequence.org: Uniprot/SPTREMBL:B6SU06; F-box protein GID2 | Uniprot/SPTREMBL:B6SQT1; F-box protein GID2 | UniGene:Zm.64757; F-box protein GID2 | RefSeq_peptide:NP_001147675; F-box protein GID2 | RefSeq_dna:NM_001154203; F-box protein GID2 (LOC100281285) mRNA | GO:0050826; response to freezing | GO:0050825; ice binding | GO:0042309; ho…
GRMZM2G071343										Q93WC0_HORVU Flavin containing polyamine oxidase n=1 (Hordeum vulgare) Exp=0; maizesequence.org: UniGene:Zm.154941; TSA: Zea mays contig31545 mRNA sequence | UniGene:Zm.142312; TSA: Zea mays contig28791 mRNA sequence | UniGene:Zm.127532; Clone 245505 mRNA sequence | GO:0055114; oxidation reduction | GO:0016491; oxidoreductase activity
GRMZM2G071217										Q0J291_ORYSJ Os09g0368200 protein n=1 (Oryza sativa subsp. japonica) Exp=8e-135; maizesequence.org: UniGene:Zm.131883; Transcribed locus moderately similar to NP_001049247.2 Os03g0193400 [Oryza sativa Japonica Group] | GO:0055114; oxidation reduction | GO:0016491; oxidoreductase activity
GRMZM2G153799										Q93WC0_HORVU Flavin containing polyamine oxidase n=1 (Hordeum vulgare) Exp=8e-158; maizesequence.org: UniGene:Zm.131883; Transcribed locus moderately similar to NP_001049247.2 Os03g0193400 [Oryza sativa Japonica Group] | GO:0055114; oxidation reduction | GO:0016491; oxidoreductase activity
GRMZM2G169890										P93801_MAIZE Superoxide dismutase [Cu-Zn] n=1 (Zea mays) Exp=1e-82; maizesequence.org: Uniprot/SWISSPROT:P23345; Superoxide dismutase [Cu-Zn] 4A (EC 1.15.1.1) | Uniprot/SPTREMBL:P93800; Superoxide dismutase 4 Fragment | Uniprot/SPTREMBL:C4J9A9; Superoxide dismutase [Cu-Zn] (EC 1.15.1.1) | Uniprot/SPTREMBL:B4FIC7; Superoxide dismutase [Cu-Zn] (EC 1.15.1.1) | RefSeq_peptide:NP_001105704; superoxide…
GRMZM2G131897										C1KLB9_SORBI Dof-type zinc finger protein n=2 (Sorghum bicolor) Exp=2e-30; maizesequence.org: GO:0045449; regulation of transcription | GO:0008270; zinc ion binding | GO:0003677; DNA binding
GRMZM2G165090										C5YRB1_SORBI Putative uncharacterized protein Sb08g020300 n=1 (Sorghum bicolor) Exp=2e-68; maizesequence.org: GO:0005634; nucleus | GO:0030528; transcription regulator activity | GO:0045449; regulation of transcription
GRMZM2G148220										B6TW19_MAIZE MADS-box transcription factor 31 n=3 (Andropogoneae) Exp=6e-75; maizesequence.org: GO:0043565; sequence-specific DNA binding | GO:0006355; regulation of transcription DNA-dependent | GO:0005634; nucleus | GO:0003700; transcription factor activity
GRMZM2G052045										C5YL68_SORBI Putative uncharacterized protein Sb07g021110 n=1 (Sorghum bicolor) Exp=5e-26; maizesequence.org: GO:0043565; sequence-specific DNA binding | GO:0006355; regulation of transcription DNA-dependent | GO:0005634; nucleus | GO:0003700; transcription factor activity
GRMZM2G081515										B4FSV1_MAIZE Putative uncharacterized protein n=1 (Zea mays) Exp=5e-78; maizesequence.org: Uniprot/SPTREMBL:B4FSV1; Putative uncharacterized protein | UniGene:Zm.139533; Hypothetical protein LOC100304411 | RefSeq_peptide:NP_001159319; hypothetical protein LOC100304411 | RefSeq_dna:NM_001165847; hypothetical protein LOC100304411 (LOC100304411) mRNA | EntrezGene:100304411; hypothetical protein LOC1…
GRMZM2G163761										Q8RXA9_MAIZE Knotted1-interacting protein n=1 (Zea mays) Exp=9e-41; maizesequence.org: Uniprot/SPTREMBL:Q8RXA9; Knotted1-interacting protein | UniGene:Zm.135378; Clone 277285 mRNA sequence | UniGene:Zm.10313; Knotted interacting protein1 | RefSeq_peptide:NP_001105184; knotted interacting protein1 | RefSeq_dna:NM_001111714; knotted interacting protein1 (kip1) mRNA | MaizeGDB_GenBank:AY082396; prod…
GRMZM2G144744										DWRF8_MAIZE DELLA protein DWARF8 n=6 (Andropogoneae) Exp=0; maizesequence.org: Uniprot/SPTREMBL:C0PNB6; Putative uncharacterized protein | Uniprot/SPTREMBL:Q6R4G7; Gibberelin response modulator dwarf 8 Fragment | Uniprot/SPTREMBL:Q6R4G9; Gibberelin response modulator dwarf 8 Fragment | Uniprot/SPTREMBL:Q6R4H0; Gibberelin response modulator dwarf 8 Fragment | Uniprot/SWISSPROT:Q9ST48; DELLA protei…
GRMZM2G017087										KN1_MAIZE Homeotic protein knotted-1 n=7 (Panicoideae) Exp=9e-57; maizesequence.org: GO:0030528; transcription regulator activity | GO:0043565; sequence-specific DNA binding | Uniprot/SPTREMBL:Q4TV03; Knotted 1 Fragment | GO:0006355; regulation of transcription DNA-dependent | GO:0005634; nucleus | GO:0003700; transcription factor activity | GO:0003677; DNA binding
GRMZM2G174083										B6SVD1_MAIZE Two-component response regulator-like PRR1 n=2 (Andropogoneae) Exp=4e-157; maizesequence.org: GO:0016459; myosin complex | GO:0005524; ATP binding | GO:0003774; motor activity
GRMZM2G480621										C5YW10_SORBI Putative uncharacterized protein Sb09g029140 n=1 (Sorghum bicolor) Exp=4e-42; maizesequence.org: GO:0043565; sequence-specific DNA binding | GO:0006355; regulation of transcription DNA-dependent | GO:0005634; nucleus | GO:0005622; intracellular | GO:0003677; DNA binding
GRMZM2G028969										C5YDG8_SORBI Putative uncharacterized protein Sb06g024540 n=1 (Sorghum bicolor) Exp=4e-66; maizesequence.org: GO:0050826; response to freezing | GO:0050825; ice binding | GO:0042309; homoiothermy | GO:0006355; regulation of transcription DNA-dependent | GO:0003700; transcription factor activity | GO:0003677; DNA binding
GRMZM2G105137										C5YDG5_SORBI Putative uncharacterized protein Sb06g024510 n=1 (Sorghum bicolor) Exp=7e-73; maizesequence.org: GO:0003677; DNA binding | UniGene:Zm.92942; R2R3MYB-domain protein | Uniprot/SPTREMBL:Q9SQA3; R2R3MYB-domain protein Fragment
GRMZM2G147241										C5YC33_SORBI Putative uncharacterized protein Sb06g022610 n=2 (Andropogoneae) Exp=2e-75; maizesequence.org: RefSeq_dna:NM_001149369; hypothetical protein LOC100275232 (LOC100275232) mRNA | RefSeq_peptide:NP_001142841; hypothetical protein LOC100275232 | UniGene:Zm.17382; Hypothetical protein LOC100275232
AC197575.3_FG008										B6TJV4_MAIZE 14-3-3-like protein A n=1 (Zea mays) Exp=1e-17; maizesequence.org: GO:0019904; protein domain specific binding
GRMZM2G373828										B6UHC3_MAIZE Calmodulin n=1 (Zea mays) Exp=3e-60; maizesequence.org: GO:0005509; calcium ion binding
GRMZM2G019993										A9LLZ5_MAIZE ZCN21 n=2 (Andropogoneae) Exp=2e-107; maizesequence.org: Uniprot/SPTREMBL:A9LLZ5; ZCN21
GRMZM2G438260										C5YCC4_SORBI Putative uncharacterized protein Sb06g001940 n=1 (Sorghum bicolor) Exp=0; maizesequence.org: GO:0043565; sequence-specific DNA binding | GO:0030528; transcription regulator activity | GO:0006355; regulation of transcription DNA-dependent | GO:0005634; nucleus | GO:0003700; transcription factor activity
GRMZM2G060444										C5YDD8_SORBI Putative uncharacterized protein Sb06g004510 n=1 (Sorghum bicolor) Exp=0; maizesequence.org: GO:0043565; sequence-specific DNA binding | GO:0006418; tRNA aminoacylation for protein translation | GO:0006412; translation | GO:0006355; regulation of transcription DNA-dependent | GO:0005737; cytoplasm | GO:0005524; ATP binding | GO:0004812; aminoacyl-tRNA ligase activity | GO:0003700; tr…
GRMZM2G075215										A8WES8_MAIZE ZCN17 n=3 (Andropogoneae) Exp=5e-102; maizesequence.org: Uniprot/SPTREMBL:A9LLZ1; ZCN17 | Uniprot/SPTREMBL:A8WES8; ZCN17 | UniGene:Zm.103285; ZCN17 protein | RefSeq_peptide:NP_001106254; ZCN17 protein | RefSeq_dna:NM_001112783; ZCN17 protein (ZCN17) mRNA | GenBank:EU241932; product:ZCN17 | EntrezGene:100127526; ZCN17 protein
GRMZM2G473891										B6SUZ9_MAIZE Importin alpha-2 subunit n=3 (Andropogoneae) Exp=2e-37; maizesequence.org: GO:0005515; protein binding | GO:0005488; binding | GO:0003676; nucleic acid binding
GRMZM2G416524										C5Y628_SORBI Putative uncharacterized protein Sb05g004800 n=1 (Sorghum bicolor) Exp=1e-43
GRMZM2G066638										B6SVD1_MAIZE Two-component response regulator-like PRR1 n=2 (Andropogoneae) Exp=4e-157; maizesequence.org: GO:0016459; myosin complex | GO:0005524; ATP binding | GO:0003774; motor activity
GRMZM2G124037										Q8GZQ2_MAIZE CBF3-like protein n=1 (Zea mays) Exp=6e-84; maizesequence.org: Uniprot/SPTREMBL:Q8GZQ2; CBF3-like proteinCRT/DRE binding factorDREB-like protein ;; | UniGene:Zm.13245; CBF3-like protein | RefSeq_peptide:NP_001105651; CBF3-like protein | RefSeq_dna:NM_001112181; CBF3-like protein (CBF3) mRNA | MaizeGDB_GenBank:AF450481; product:DREB-like protein | GO:0006355; regulation of transcripti…
GRMZM2G179452										B6TJV4_MAIZE 14-3-3-like protein A n=1 (Zea mays) Exp=1e-61; maizesequence.org: GO:0019904; protein domain specific binding
GRMZM2G143602										CSK2A_MAIZE Casein kinase II subunit alpha n=20 (Magnoliophyta) Exp=0; maizesequence.org: Uniprot/SWISSPROT:P28523; Casein kinase II subunit alpha (EC 2.7.11.1)(CK2-alpha)(CK II) | Uniprot/SPTREMBL:Q9ST47; Protein kinase CK2 alpha subunit | Uniprot/SPTREMBL:B4FFS6; Putative uncharacterized protein | UniGene:Zm.95201; Transcribed locus strongly similar to NP_001105632.1 casein kinase II subunit al…
GRMZM2G133168										C5XLT0_SORBI Putative uncharacterized protein Sb03g002630 n=1 (Sorghum bicolor) Exp=2e-18; maizesequence.org: GO:0003677; DNA binding | UniGene:Zm.134152; Clone 1489920 mRNA sequence | GO:0050826; response to freezing | GO:0050825; ice binding | GO:0042309; homoiothermy | GO:0006355; regulation of transcription DNA-dependent | GO:0003700; transcription factor activity
GRMZM2G478501										C5YW10_SORBI Putative uncharacterized protein Sb09g029140 n=1 (Sorghum bicolor) Exp=9e-46; maizesequence.org: GO:0003677; DNA binding | GO:0005622; intracellular | GO:0005634; nucleus | GO:0006355; regulation of transcription DNA-dependent | GO:0043565; sequence-specific DNA binding
GRMZM2G416913										C5YQN8_SORBI Putative uncharacterized protein Sb08g001570 n=1 (Sorghum bicolor) Exp=0; maizesequence.org: GO:0018024; histone-lysine N-methyltransferase activity | GO:0016568; chromatin modification | GO:0008270; zinc ion binding | GO:0005634; nucleus
GRMZM2G160687										Q43353_MAIZE MADS-box transcription factor 13 n=8 (Andropogoneae) Exp=2e-143; maizesequence.org: RefSeq_peptide:NP_001105378; Zea AGAMOUS homolog2 | Uniprot/SPTREMBL:B4FPE5; Putative uncharacterized protein | Uniprot/SPTREMBL:C0P2L8; Putative uncharacterized protein | Uniprot/SPTREMBL:Q43353; MADS box proteinMADS-box transcription factor 13ZAG2 protein ;; | Uniprot/SPTREMBL:Q7DN00; ZAG2 protein F…
GRMZM2G097182										C5XJC4_SORBI Putative uncharacterized protein Sb03g047170 n=1 (Sorghum bicolor) Exp=3e-76; maizesequence.org: GO:0003677; DNA binding | GO:0003700; transcription factor activity | GO:0006355; regulation of transcription DNA-dependent
GRMZM2G169884										C5XH49_SORBI Putative uncharacterized protein Sb03g045130 n=1 (Sorghum bicolor) Exp=1e-70; maizesequence.org: GO:0003677; DNA binding | GO:0005622; intracellular | GO:0043565; sequence-specific DNA binding
GRMZM2G141638										C5XFE5_SORBI Putative uncharacterized protein Sb03g042810 n=1 (Sorghum bicolor) Exp=0; maizesequence.org: GO:0006355; regulation of transcription DNA-dependent | GO:0003700; transcription factor activity | GO:0003677; DNA binding
GRMZM2G145058										B6SVD1_MAIZE Two-component response regulator-like PRR1 n=2 (Andropogoneae) Exp=4e-157
GRMZM2G145058										B6SVD1_MAIZE Two-component response regulator-like PRR1 n=2 (Andropogoneae) Exp=4e-157
GRMZM2G078798										B6U889_MAIZE Gibberellin 2-oxidase n=1 (Zea mays) Exp=2e-47
GRMZM2G120619										CB48_MAIZE Chlorophyll a-b binding protein 48, chloroplastic n=3 (Zea mays) Exp=4e-139; maizesequence.org: UniGene:Zm.104246; Transcribed locus moderately similar to NP_001043493.1 Os01g0600900 [Oryza sativa Japonica Group] | Uniprot/SWISSPROT:Q00827; Chlorophyll a-b binding protein 48 chloroplastic Precursor (LHCII type I CAB-48)(LHCP)
GRMZM2G078592										Q6YXY3_ORYSJ Putative splicing factor 3b, subunit 3, 130kDa n=4 (Poaceae) Exp=0
GRMZM2G156079										Q7XVG4_ORYSJ Os04g0411400 protein n=7 (Poaceae) Exp=2e-86; maizesequence.org: Uniprot/SPTREMBL:A8WER4; ZCN2 | UniGene:Zm.103292; ZCN2 protein | RefSeq_peptide:NP_001106241; ZCN2 protein | RefSeq_dna:NM_001112770; ZCN2 protein (ZCN2) mRNA | GenBank:EU241918; product:ZCN2 | EntrezGene:100127513; ZCN2 protein
GRMZM2G139740										C5XUW5_SORBI Putative uncharacterized protein Sb04g022943 (Fragment) n=1 (Sorghum bicolor) Exp=2e-58; maizesequence.org: GO:0003677; DNA binding | GO:0003700; transcription factor activity | GO:0006355; regulation of transcription DNA-dependent
GRMZM2G459645										C5XXT0_SORBI Putative uncharacterized protein Sb04g026450 n=3 (Andropogoneae) Exp=6e-66; maizesequence.org: Uniprot/SPTREMBL:B6SJ52; Putative uncharacterized protein | UniGene:Zm.129633; Hypothetical protein LOC100274783 | UniGene:Zm.114696; Transcribed locus | RefSeq_peptide:NP_001142538; hypothetical protein LOC100274783 | RefSeq_dna:NM_001149066; hypothetical protein LOC100274783 (LOC100274783…
GRMZM2G131516										SCR_MAIZE Protein SCARECROW n=1 (Zea mays) Exp=0
GRMZM2G140085										C4J338_MAIZE Putative uncharacterized protein n=1 (Zea mays) Exp=1e-93; maizesequence.org: UniGene:Zm.140390; Full-length cDNA clone ZM_BFb0338F06 | Uniprot/SPTREMBL:C4J338; Putative uncharacterized protein
GRMZM2G168229										B4FG20_MAIZE Putative uncharacterized protein n=2 (Zea mays) Exp=0; maizesequence.org: Uniprot/SPTREMBL:B6T5K3; Putative uncharacterized protein | Uniprot/SPTREMBL:B4FG20; Putative uncharacterized protein | UniGene:Zm.34753; Hypothetical protein LOC100193719 | RefSeq_peptide:NP_001132280; hypothetical protein LOC100193719 | RefSeq_dna:NM_001138808; hypothetical protein LOC100193719 (LOC100193719)…
GRMZM2G181028										PHYA_SORBI Phytochrome a n=19 (Andropogoneae) Exp=0; maizesequence.org: GO:0017006; protein-tetrapyrrole linkage | GO:0018298; protein-chromophore linkage | GO:0042803; protein homodimerization activity | GO:0045449; regulation of transcription | UniGene:Zm.122215; TSA: Zea mays contig22121 mRNA sequence | UniGene:Zm.144271; TSA: Zea mays contig56499 mRNA sequence | Uniprot/SPTREMBL:Q53ZT7; Phyto…
GRMZM2G105518										CB23_ORYSJ Chlorophyll a-b binding protein, chloroplastic n=16 (Spermatophyta) Exp=2e-63
GRMZM2G582893										B6TY54_MAIZE Nuclear transcription factor Y subunit A-7 n=3 (Andropogoneae) Exp=2e-30; maizesequence.org: GO:0016602; CCAAT-binding factor complex | GO:0006355; regulation of transcription DNA-dependent | GO:0005634; nucleus | GO:0003700; transcription factor activity | GO:0003677; DNA binding
AC215811.3_FG003										C5XS62_SORBI Putative uncharacterized protein Sb04g000820 n=1 (Sorghum bicolor) Exp=2e-41
AC192244.3_FG001										B6TNX7_MAIZE Proteasome subunit alpha type n=3 (Zea mays) Exp=6e-55; maizesequence.org: UniGene:Zm.67239; Proteasome subunit alpha type 1 | RefSeq_peptide:NP_001149085; proteasome subunit alpha type 1 | RefSeq_dna:NM_001155613; proteasome subunit alpha type 1 (LOC100282706) mRNA | GO:0019773; proteasome core complex alpha-subunit complex | GO:0006511; ubiquitin-dependent protein catabolic process…
GRMZM2G130382										M17_MAIZE MADS-box protein ZMM17 n=4 (Andropogoneae) Exp=7e-29; maizesequence.org: GO:0043565; sequence-specific DNA binding | GO:0006355; regulation of transcription DNA-dependent | GO:0005634; nucleus | GO:0003700; transcription factor activity
GRMZM2G143433										Q6H7L7_ORYSJ Putative uncharacterized protein OJ1524_D08.25 n=2 (Oryza sativa) Exp=7e-129; maizesequence.org: GO:0042309; homoiothermy | GO:0050825; ice binding | GO:0050826; response to freezing
AC210949.4_FG003										B6TGZ0_MAIZE G-box-binding factor 4 n=1 (Zea mays) Exp=3e-52; maizesequence.org: GO:0003700; transcription factor activity | GO:0006355; regulation of transcription DNA-dependent | GO:0043565; sequence-specific DNA binding
AC210949.4_FG003										B6TGZ0_MAIZE G-box-binding factor 4 n=1 (Zea mays) Exp=3e-52; maizesequence.org: GO:0003700; transcription factor activity | GO:0006355; regulation of transcription DNA-dependent | GO:0043565; sequence-specific DNA binding
GRMZM2G156621										C5XW64_SORBI Putative uncharacterized protein Sb04g004940 n=3 (Andropogoneae) Exp=7e-153; maizesequence.org: Uniprot/SPTREMBL:B4F8H7; Putative uncharacterized protein | UniGene:Zm.98911; Hypothetical protein LOC100191346 | RefSeq_peptide:NP_001130252; hypothetical protein LOC100191346 | RefSeq_dna:NM_001136780; hypothetical protein LOC100191346 (LOC100191346) mRNA | GO:0005634; nucleus | GO:00036…
GRMZM2G005301										Q6ETB0_ORYSJ Putative AP2 domain-containing protein n=1 (Oryza sativa subsp. japonica) Exp=6e-23; maizesequence.org: UniGene:Zm.135211; Transcribed locus | UniGene:Zm.127277; Transcribed locus weakly similar to XP_002453568.1 hypothetical protein SORBIDRAFT_04g008230 [Sorghum bicolor] | GO:0006355; regulation of transcription DNA-dependent | GO:0003700; transcription factor activity | GO:0003677;…
GRMZM2G047918										Q6ETB0_ORYSJ Putative AP2 domain-containing protein n=1 (Oryza sativa subsp. japonica) Exp=5e-42; maizesequence.org: GO:0006355; regulation of transcription DNA-dependent | GO:0003700; transcription factor activity | GO:0003677; DNA binding
GRMZM2G088736										C0PG57_MAIZE Putative uncharacterized protein n=1 (Zea mays) Exp=2e-30; maizesequence.org: GO:0006511; ubiquitin-dependent protein catabolic process | GO:0031461; cullin-RING ubiquitin ligase complex | GO:0031625; ubiquitin protein ligase binding
GRMZM2G011789										Q94EJ7_MAIZE Leafy cotyledon1 n=2 (Zea mays) Exp=1e-92; maizesequence.org: MaizeGDB_GenBank:AF410176; product:leafy cotyledon1 | RefSeq_dna:NM_001112048; leafy cotyledon (lec1) mRNA | RefSeq_dna:NM_001159156; nuclear transcription factor Y subunit B-6 (LOC100286269) mRNA | RefSeq_peptide:NP_001105518; leafy cotyledon | RefSeq_peptide:NP_001152628; nuclear transcription factor Y subunit B-6 | UniG…
GRMZM2G000703										B6TGZ0_MAIZE G-box-binding factor 4 n=1 (Zea mays) Exp=5e-41
GRMZM2G000703										B6TGZ0_MAIZE G-box-binding factor 4 n=1 (Zea mays) Exp=5e-41
GRMZM2G343068										C5Z7V2_SORBI Putative uncharacterized protein Sb10g027280 n=1 (Sorghum bicolor) Exp=3e-121; maizesequence.org: GO:0003677; DNA binding
GRMZM2G401835										C5Y5J4_SORBI Putative uncharacterized protein Sb05g004150 n=1 (Sorghum bicolor) Exp=2e-86
GRMZM2G401821										C5Y5J4_SORBI Putative uncharacterized protein Sb05g004150 n=1 (Sorghum bicolor) Exp=8e-27; maizesequence.org: GO:0000156; two-component response regulator activity | GO:0000160; two-component signal transduction system (phosphorelay) | GO:0006355; regulation of transcription DNA-dependent
GRMZM2G376684										C0PHI8_MAIZE Putative uncharacterized protein n=1 (Zea mays) Exp=5e-88; maizesequence.org: GO:0003677; DNA binding
GRMZM2G075064										B4FXU8_MAIZE Putative uncharacterized protein n=1 (Zea mays) Exp=6e-152; maizesequence.org: GO:0003677; DNA binding
GRMZM2G004334										C5Z6D6_SORBI Putative uncharacterized protein Sb10g006820 n=1 (Sorghum bicolor) Exp=0; maizesequence.org: GO:0030528; transcription regulator activity | GO:0006355; regulation of transcription DNA-dependent | GO:0005634; nucleus | GO:0003700; transcription factor activity | GO:0043565; sequence-specific DNA binding
GRMZM2G435475										B6SQJ6_MAIZE Putative uncharacterized protein n=1 (Zea mays) Exp=2e-65; maizesequence.org: Uniprot/SPTREMBL:B6SQJ6; Putative uncharacterized protein | UniGene:Zm.134517; Hypothetical protein LOC100275252 | RefSeq_peptide:NP_001142858; hypothetical protein LOC100275252 | RefSeq_dna:NM_001149386; hypothetical protein LOC100275252 (LOC100275252) mRNA | GO:0045449; regulation of transcription | GO:00…
GRMZM2G152822										C5Z3S0_SORBI Putative uncharacterized protein Sb10g002710 n=1 (Sorghum bicolor) Exp=7e-63; maizesequence.org: GO:0043565; sequence-specific DNA binding | GO:0005622; intracellular | GO:0003677; DNA binding
GRMZM2G109252										C5X4D5_SORBI Putative uncharacterized protein Sb02g009860 n=1 (Sorghum bicolor) Exp=0; maizesequence.org: Uniprot/SPTREMBL:C0PJX0; Putative uncharacterized protein | UniGene:Zm.93141; Transcribed locus weakly similar to XP_002461888.1 hypothetical protein SORBIDRAFT_02g009860 [Sorghum bicolor] | UniGene:Zm.31359; Hypothetical protein LOC100383907 | RefSeq_peptide:NP_001170002; hypothetical protei…
AC207722.2_FG009										CB2A_SPIOL Chlorophyll a-b binding protein, chloroplastic n=32 (Magnoliophyta) Exp=1e-136; maizesequence.org: Uniprot/SWISSPROT:P12329; Chlorophyll a-b binding protein 1 chloroplastic Precursor (LHCII type I CAB-1)(LHCP) | Uniprot/SPTREMBL:C0PAQ4; Putative uncharacterized protein | Uniprot/SPTREMBL:B6STN4; Chlorophyll a-b binding protein 2 | Uniprot/SPTREMBL:B4FNR1; Chlorophyll a-b binding protei…
GRMZM2G418899										C0PMC8_MAIZE Putative uncharacterized protein n=1 (Zea mays) Exp=3e-143
GRMZM2G025992										SODC2_MAIZE Superoxide dismutase [Cu-Zn] 2 n=4 (Poaceae) Exp=4e-85; maizesequence.org: Uniprot/SWISSPROT:P11428; Superoxide dismutase [Cu-Zn] 2 (EC 1.15.1.1) | Uniprot/SPTREMBL:C4J094; Superoxide dismutase [Cu-Zn] (EC 1.15.1.1) | Uniprot/SPTREMBL:B6T056; Superoxide dismutase [Cu-Zn] (EC 1.15.1.1) | UniGene:Zm.25; SOD2 protein | RefSeq_peptide:NP_001105335; superoxide dismutase | GO:0055114; oxida…
GRMZM2G021614										A8WES1_MAIZE ZCN9 n=6 (Andropogoneae) Exp=3e-95; maizesequence.org: Uniprot/SPTREMBL:B6UIB1; MFT2-Corn MFT-like protein | Uniprot/SPTREMBL:A9LLY3; ZCN9 | Uniprot/SPTREMBL:A8WES1; ZCN9 | UniGene:Zm.136433; MFT2 - Corn MFT-like protein | UniGene:Zm.103287; ZCN9 protein | RefSeq_peptide:NP_001152713; MFT2 - Corn MFT-like protein | RefSeq_peptide:NP_001106248; ZCN9 protein | RefSeq_dna:NM_001159241; …
GRMZM2G000483										Q93VD4_ORYSJ Os01g0155000 protein n=2 (Oryza sativa) Exp=7e-108; maizesequence.org: GO:0008152; metabolic process | GO:0016787; hydrolase activity
GRMZM2G155216										CB21_ORYSJ Chlorophyll a-b binding protein 1, chloroplastic n=37 (Magnoliophyta) Exp=1e-129; maizesequence.org: Uniprot/SPTREMBL:B4FQ80; Chlorophyll a-b binding protein 2Putative uncharacterized protein ; | Uniprot/SPTREMBL:B4FUA1; Chlorophyll a-b binding protein 1Putative uncharacterized protein ; | Uniprot/SPTREMBL:Q41787; Light harvesting chlorophyll a /b binding protein Precursor | Uniprot/SW…
GRMZM2G098443										C5X0X2_SORBI Putative uncharacterized protein Sb01g049150 n=1 (Sorghum bicolor) Exp=5e-75; maizesequence.org: GO:0003677; DNA binding | GO:0006355; regulation of transcription DNA-dependent
GRMZM2G126010										D1IVV3_VITVI Whole genome shotgun sequence of line PN40024, scaffold_44.assembly12x (Fragment) n=1 (Vitis vinifera) Exp=0; maizesequence.org: Uniprot/SWISSPROT:P02582; Actin-1 | Uniprot/SPTREMBL:B6T5K6; Actin-1 | Uniprot/SPTREMBL:B4FPG2; Putative uncharacterized protein | UniGene:Zm.81059; Actin1 | UniGene:Zm.144468; TSA: Zea mays contig55041 mRNA sequence | RefSeq_peptide:NP_001148651; actin1 | …
GRMZM2G170412										C5XF98_SORBI Putative uncharacterized protein Sb03g029850 n=1 (Sorghum bicolor) Exp=0; maizesequence.org: GO:0005515; protein binding | GO:0008270; zinc ion binding | UniGene:Zm.129600; Transcribed locus moderately similar to XP_002456070.1 hypothetical protein SORBIDRAFT_03g029850 [Sorghum bicolor]
GRMZM2G078798										B6U889_MAIZE Gibberellin 2-oxidase n=1 (Zea mays) Exp=2e-47
GRMZM2G167216										Q5VRH5_ORYSJ Putative uncharacterized protein OSJNBa0075G19.22 n=2 (Oryza sativa) Exp=4e-18; maizesequence.org: GO:0005622; intracellular | GO:0008270; zinc ion binding
GRMZM2G167576										C0HF68_MAIZE Putative uncharacterized protein n=1 (Zea mays) Exp=6e-111; maizesequence.org: Uniprot/SPTREMBL:C0HF68; Putative uncharacterized protein | UniGene:Zm.13848; Hypothetical protein LOC100304371 | RefSeq_peptide:NP_001159281; hypothetical protein LOC100304371 | RefSeq_dna:NM_001165809; hypothetical protein LOC100304371 (LOC100304371) mRNA | GO:0043565; sequence-specific DNA binding | GO:…
GRMZM2G073047										C5Z4J8_SORBI Putative uncharacterized protein Sb10g021870 n=1 (Sorghum bicolor) Exp=1e-21; maizesequence.org: UniGene:Zm.129424; Clone 453357 mRNA sequence | GO:0006355; regulation of transcription DNA-dependent | GO:0003700; transcription factor activity | GO:0003677; DNA binding
GRMZM2G047684										B6SWV0_MAIZE Cytochrome P450 CYP734A7 n=2 (Zea mays) Exp=0; maizesequence.org: Uniprot/SPTREMBL:B6SWV0; Cytochrome P450 CYP734A7 | UniGene:Zm.4576; Cytochrome P450 CYP734A7 | RefSeq_peptide:NP_001153094; cytochrome P450 CYP734A7 | RefSeq_dna:NM_001159622; cytochrome P450 CYP734A7 (CYP734A7) mRNA | GO:0055114; oxidation reduction | GO:0020037; heme binding | GO:0009055; electron carrier activity |…
GRMZM2G310362										C5Z568_SORBI Putative uncharacterized protein Sb10g022900 n=1 (Sorghum bicolor) Exp=0; maizesequence.org: RefSeq_dna:NM_001176190; hypothetical protein LOC100383542 (LOC100383542) mRNA | RefSeq_peptide:NP_001169661; hypothetical protein LOC100383542 | UniGene:Zm.36059; Transcribed locus strongly similar to NP_001169661.1 hypothetical protein LOC100383542 [Zea mays] | Uniprot/SPTREMBL:C0PGV4; Puta…
GRMZM2G167088										C0PHI8_MAIZE Putative uncharacterized protein n=1 (Zea mays) Exp=3e-98; maizesequence.org: GO:0003677; DNA binding
GRMZM2G160730										B4FTA8_MAIZE Putative uncharacterized protein n=1 (Zea mays) Exp=4e-98; maizesequence.org: Uniprot/SPTREMBL:C1JY49; Glossy15 Fragment | Uniprot/SPTREMBL:C1JY37; Glossy15 Fragment | Uniprot/SPTREMBL:C1JY36; Glossy15 Fragment | Uniprot/SPTREMBL:C1JY34; Glossy15 Fragment | Uniprot/SPTREMBL:C1JY33; Glossy15 Fragment | Uniprot/SPTREMBL:C1JY24; Glossy15 Fragment | Uniprot/SPTREMBL:C1JY23; Glossy15 Frag…
GRMZM2G160730										B4FTA8_MAIZE Putative uncharacterized protein n=1 (Zea mays) Exp=4e-98; maizesequence.org: Uniprot/SPTREMBL:C1JY49; Glossy15 Fragment | Uniprot/SPTREMBL:C1JY37; Glossy15 Fragment | Uniprot/SPTREMBL:C1JY36; Glossy15 Fragment | Uniprot/SPTREMBL:C1JY34; Glossy15 Fragment | Uniprot/SPTREMBL:C1JY33; Glossy15 Fragment | Uniprot/SPTREMBL:C1JY24; Glossy15 Fragment | Uniprot/SPTREMBL:C1JY23; Glossy15 Frag…
GRMZM2G114680										C5Z5S1_SORBI Putative uncharacterized protein Sb10g023950 n=1 (Sorghum bicolor) Exp=3e-150; maizesequence.org: UniGene:Zm.99857; Transcribed locus strongly similar to XP_002437271.1 hypothetical protein SORBIDRAFT_10g023950 [Sorghum bicolor] | UniGene:Zm.21676; Transcribed locus strongly similar to XP_002437271.1 hypothetical protein SORBIDRAFT_10g023950 [Sorghum bicolor]
GRMZM2G139082										Q41832_MAIZE Orf protein n=1 (Zea mays) Exp=0; maizesequence.org: Uniprot/SPTREMBL:Q41832; Orf protein | UniGene:Zm.123; Heat shock complementing factor1 | RefSeq_peptide:NP_001106068; heat shock complementing factor1 | RefSeq_dna:NM_001112598; heat shock complementing factor1 (hscf1) mRNA | MaizeGDB_GenBank:AY109146; | GO:0006355; regulation of transcription DNA-dependent | GO:0003700; transcrip…
GRMZM2G058522										P93801_MAIZE Superoxide dismutase [Cu-Zn] n=1 (Zea mays) Exp=1e-83; maizesequence.org: UniGene:Zm.157581; TSA: Zea mays cultivar W22 CL633Contig1.betc mRNA sequence | Uniprot/SPTREMBL:B6SK54; Superoxide dismutase [Cu-Zn] (EC 1.15.1.1) | Uniprot/SPTREMBL:C4J9A9; Superoxide dismutase [Cu-Zn] (EC 1.15.1.1) | Uniprot/SPTREMBL:P93801; Superoxide dismutase [Cu-Zn] (EC 1.15.1.1) | Uniprot/SWISSPROT:P233…
GRMZM2G128953										B6TW19_MAIZE MADS-box transcription factor 31 n=3 (Andropogoneae) Exp=1e-75; maizesequence.org: GO:0043565; sequence-specific DNA binding | GO:0006355; regulation of transcription DNA-dependent | GO:0005634; nucleus | GO:0003700; transcription factor activity
GRMZM2G412075										C5WPD4_SORBI Putative uncharacterized protein Sb01g039310 n=1 (Sorghum bicolor) Exp=0; maizesequence.org: UniGene:Zm.13073; Transcribed locus moderately similar to XP_002468087.1 hypothetical protein SORBIDRAFT_01g039310 [Sorghum bicolor] | GO:0006412; translation | GO:0005840; ribosome | GO:0005622; intracellular | GO:0003735; structural constituent of ribosome | GO:0003723; RNA binding | GO:000…
GRMZM2G317287										C5YQJ1_SORBI Putative uncharacterized protein Sb08g001190 n=1 (Sorghum bicolor) Exp=4e-116; maizesequence.org: GO:0006631; fatty acid metabolic process | GO:0016491; oxidoreductase activity | GO:0045300; acyl-[acyl-carrier-protein] desaturase activity | GO:0046914; transition metal ion binding | GO:0055114; oxidation reduction
GRMZM2G423393										C5YJ24_SORBI Putative uncharacterized protein Sb07g006880 n=1 (Sorghum bicolor) Exp=2e-101; maizesequence.org: GO:0003677; DNA binding | GO:0006355; regulation of transcription DNA-dependent
GRMZM2G180168										C5YHA5_SORBI Putative uncharacterized protein Sb07g003880 n=1 (Sorghum bicolor) Exp=2e-84; maizesequence.org: UniGene:Zm.32888; Transcribed locus moderately similar to XP_002443891.1 hypothetical protein SORBIDRAFT_07g003880 [Sorghum bicolor] | GO:0006355; regulation of transcription DNA-dependent | GO:0003677; DNA binding
GRMZM2G148924										FIE2_MAIZE Polycomb group protein FIE2 n=6 (Andropogoneae) Exp=0; maizesequence.org: Uniprot/SWISSPROT:Q8VZY6; Polycomb group protein FIE2 (Protein FERTILIZATION-INDEPENDENT ENDOSPERM 2) | Uniprot/SPTREMBL:Q84YB6; Fertilization-independent endosperm protein 2 Fragment | Uniprot/SPTREMBL:Q84YB4; Fertilization-independent endosperm protein 2 | Uniprot/SPTREMBL:Q6XZP7; Fertilization-independent type…
GRMZM2G424348										B6SZJ5_MAIZE Dehydration-responsive element-binding protein 1D n=3 (Zea mays) Exp=3e-84; maizesequence.org: Uniprot/SPTREMBL:B6SZJ5; Dehydration-responsive element-binding protein 1D | Uniprot/SPTREMBL:B6SZH0; Dehydration-responsive element-binding protein 1D | Uniprot/SPTREMBL:B4FXQ5; Putative uncharacterized protein | UniGene:Zm.119892; Dehydration-responsive element-binding protein 1D | RefSeq…
GRMZM2G074773										B6SZS1_MAIZE Nuclear transcription factor Y subunit C-9 n=1 (Zea mays) Exp=5e-45; maizesequence.org: GO:0043565; sequence-specific DNA binding | GO:0005622; intracellular | GO:0003677; DNA binding
* published data from Li et al., 2016.
